# Supplementary material for: Prediction of acute toxicity of emerging contaminants on the water flea Daphnia magna by Ant Colony Optimization–Support Vector Machine QSTR models
Source: Royal Society of Chemistry journal article supplement (doi:10.1039/c6em00679e), 2017-01-01
Supplement: c6em00679e2.xlsx [file c6em00679e2.xlsx]

## Sheet: Table S1
Table S1. The experimental and prediction results for the τraining and test set
Group	Mol. ID	CAS	optimized_Inchi	LC50(ug/L)	Exp. pLC50	Pred. pLC50 by ACO-MLR	Pred. pLC50 by ACO-SVM
Training	M1	50-00-0	InChI=1S/CH2O/c1-2/h1H2	2743.33	4.03922	2.60514	3.27755
Test	M2	50-28-2	InChI=1S/C18H24O2/c1-18-9-8-14-13-5-3-12(19)10-11(13)2-4-15(14)16(18)6-7-17(18)20/h3,5,10,14-17,19-20H,2,4,6-9H2,1H3/t14-,15+,16-,17+,18-/m1/s1	2585	5.02272	4.741	4.88867
Training	M3	50-29-3	InChI=1S/C14H9Cl5/c15-11-5-1-9(2-6-11)13(14(17,18)19)10-3-7-12(16)8-4-10/h1-8,13H	5	7.85063	6.92145	7.75063
Training	M4	50-32-8	InChI=1S/C20H12/c1-2-7-17-15(4-1)12-16-9-8-13-5-3-6-14-10-11-18(17)20(16)19(13)14/h1-12H	250	6.00399	6.89735	6.95107
Training	M5	50-48-6	InChI=1S/C20H23N/c1-21(2)15-7-12-20-18-10-5-3-8-16(18)13-14-17-9-4-6-11-19(17)20/h3-6,8-12H,7,13-15H2,1-2H3	1150	5.38241	6.18292	5.48241
Training	M6	50-65-7	InChI=1S/C13H8Cl2N2O4/c14-7-1-4-12(18)9(5-7)13(19)16-11-3-2-8(17(20)21)6-10(11)15/h1-6,18H,(H,16,19)	236.667	6.14057	4.61133	5.63645
Test	M7	50-78-2	InChI=1S/C9H8O4/c1-6(10)13-8-5-3-2-4-7(8)9(11)12/h2-5H,1H3,(H,11,12)	167548	3.03151	3.48077	3.16277
Training	M8	51-03-6	InChI=1S/C19H30O5/c1-3-5-7-20-8-9-21-10-11-22-14-17-13-19-18(23-15-24-19)12-16(17)6-4-2/h12-13H,3-11,14-15H2,1-2H3	1807.5	5.2724	5.11486	5.1724
Training	M9	51-21-8	InChI=1S/C4H3FN2O2/c5-2-1-6-4(9)7-3(2)8/h1H,(H2,6,7,8,9)	28800	3.65481	2.52067	3.32866
Training	M10	51-28-5	InChI=1S/C6H4N2O5/c9-6-2-1-4(7(10)11)3-5(6)8(12)13/h1-3,9H	4099.99	4.65229	3.78927	4.55229
Test	M11	52-24-4	InChI=1S/C6H12N3PS/c11-10(7-1-2-7,8-3-4-8)9-5-6-9/h1-6H2	546000	2.53977	3.91921	3.94353
Test	M12	52-51-7	InChI=1S/C3H6BrNO4/c4-3(1-6,2-7)5(8)9/h6-7H,1-2H2	1400	5.15488	2.76492	3.11263
Training	M13	52-68-6	InChI=1S/C4H8Cl3O4P/c1-10-12(9,11-2)3(8)4(5,6)7/h3,8H,1-2H3/t3-/m0/s1	45.78	6.75	4.9587	5.38091
Training	M14	53-70-3	InChI=1S/C22H14/c1-3-7-19-15(5-1)9-11-17-14-22-18(13-21(17)19)12-10-16-6-2-4-8-20(16)22/h1-14H	20.1179	7.141	7.38056	7.23687
Training	M15	54-11-5	InChI=1S/C10H14N2/c1-12-7-3-5-10(12)9-4-2-6-11-8-9/h2,4,6,8,10H,3,5,7H2,1H3/t10-/m0/s1	4136.65	4.59349	3.54685	3.96824
Training	M16	54-85-3	InChI=1S/C6H7N3O/c7-9-6(10)5-1-3-8-4-2-5/h1-4H,7H2,(H,9,10)	104706	3.11719	1.87978	3.01719
Training	M17	55-38-9	InChI=1S/C10H15O3PS2/c1-8-7-9(5-6-10(8)16-4)13-14(15,11-2)12-3/h5-7H,1-4H3	5.7	7.68868	6.82924	7.78868
Test	M18	55-63-0	InChI=1S/C3H5N3O9/c7-4(8)13-1-3(15-6(11)12)2-14-5(9)10/h3H,1-2H2	32000.1	3.85104	3.44852	3.19028
Training	M19	56-23-5	InChI=1S/CCl4/c2-1(3,4)5	29000	3.72462	4.64022	3.82462
Training	M20	56-36-0	InChI=1S/3C4H9.C2H4O2.Sn/c3*1-3-4-2;1-2(3)4;/h3*1,3-4H2,2H3;1H3,(H,3,4);/q;;;;+1/p-1	3.29989	8.02444	7.44134	6.49412
Training	M21	56-38-2	InChI=1S/C10H14NO5PS/c1-3-14-17(18,15-4-2)16-10-7-5-9(6-8-10)11(12)13/h5-8H,3-4H2,1-2H3	0.600181	8.686	6.85814	8.586
Training	M22	56-55-3	InChI=1S/C18H12/c1-2-7-15-12-18-16(11-14(15)6-1)10-9-13-5-3-4-8-17(13)18/h1-12H	28.4275	6.90474	6.56815	6.80474
Training	M23	56-72-4	InChI=1S/C14H16ClO5PS/c1-4-17-21(22,18-5-2)20-10-6-7-11-9(3)13(15)14(16)19-12(11)8-10/h6-8H,4-5H2,1-3H3	1	8.55963	7.56423	8.5766
Training	M24	56-75-7	InChI=1S/C11H12Cl2N2O5/c12-10(13)11(18)14-8(5-16)9(17)6-1-3-7(4-2-6)15(19)20/h1-4,8-10,16-17H,5H2,(H,14,18)/t8-,9+/m1/s1	542858	2.77469	3.50731	2.87469
Test	M25	56-81-5	InChI=1S/C3H8O3/c4-1-3(6)2-5/h3-6H,1-2H2	1e+07	0.96423	1.3206	1.8248
Test	M26	57-13-6	InChI=1S/CH4N2O/c2-1(3)4/h(H4,2,3,4)	3.91e+06	1.18637	1.79678	2.38015
Training	M27	57-55-6	InChI=1S/C3H8O2/c1-3(5)2-4/h3-5H,2H2,1H3/t3-/m0/s1	1.4e+07	0.735225	1.90816	1.18497
Training	M28	57-62-5	InChI=1S/C22H23ClN2O8/c1-21(32)7-6-8-15(25(2)3)17(28)13(20(24)31)19(30)22(8,33)18(29)11(7)16(27)12-10(26)5-4-9(23)14(12)21/h4-5,7-8,15,26,28-29,32-33H,6H2,1-3H3,(H2,24,31)/t7-,8?,15-,21-,22+/m0/s1	108000	3.6468	3.39869	3.5468
Training	M29	57-63-6	InChI=1S/C20H24O2/c1-3-20(22)11-9-18-17-6-4-13-12-14(21)5-7-15(13)16(17)8-10-19(18,20)2/h1,5,7,12,16-18,21-22H,4,6,8-11H2,2H3/t16-,17+,18-,19-,20-/m1/s1	6399.99	4.6657	5.02938	4.7657
Test	M30	57-68-1	InChI=1S/C12H14N4O2S/c1-8-7-9(2)15-12(14-8)16-19(17,18)11-5-3-10(13)4-6-11/h3-7H,13H2,1-2H3,(H,14,15,16)	174400	3.20301	3.97118	3.20868
Training	M31	58-08-2	InChI=1S/C8H10N4O2/c1-10-4-9-6-5(10)7(13)12(3)8(14)11(6)2/h4H,1-3H3	342308	2.75381	3.23331	2.85381
Training	M32	58-14-0	InChI=1S/C12H13ClN4/c1-2-9-10(11(14)17-12(15)16-9)7-3-5-8(13)6-4-7/h3-6H,2H2,1H3,(H4,14,15,16,17)	5800	4.63227	4.3333	4.53227
Test	M33	58-27-5	InChI=1S/C11H8O2/c1-7-6-10(12)8-4-2-3-5-9(8)11(7)13/h2-6H,1H3	491.3	5.54464	4.11195	3.61216
Training	M34	58-55-9	InChI=1S/C7H8N4O2/c1-10-5-4(8-3-9-5)6(12)11(2)7(10)13/h3H,1-2H3,(H,8,9)	270504	2.82349	2.90713	2.92349
Training	M35	58-89-9	InChI=1S/C6H6Cl6/c7-1-2(8)4(10)6(12)5(11)3(1)9/h1-6H/t1-,2-,3-,4+,5-,6-	1600	5.25952	6.08567	5.35952
Training	M36	58-90-2	InChI=1S/C6H2Cl4O/c7-2-1-3(8)6(11)5(10)4(2)9/h1,11H	289.924	5.903	4.86609	5.803
Training	M37	59-06-3	InChI=1S/C12H15NO4/c1-4-17-11-7-9(13-8(2)14)5-6-10(11)12(15)16-3/h5-7H,4H2,1-3H3,(H,13,14)	200000	3.07418	3.9998	3.31133
Training	M38	59-50-7	InChI=1S/C7H7ClO/c1-5-4-6(9)2-3-7(5)8/h2-4,9H,1H3	2000	4.85304	3.95391	4.75304
Training	M39	59-67-6	InChI=1S/C6H5NO2/c8-6(9)5-2-1-3-7-4-5/h1-4H,(H,8,9)	76999.7	3.2038	2.52719	3.1038
Training	M40	59-87-0	InChI=1S/C6H6N4O4/c7-6(11)9-8-3-4-1-2-5(14-4)10(12)13/h1-3H,(H3,7,9,11)/b8-3-	28670	3.83954	2.9481	3.15419
Training	M41	60-00-4	InChI=1S/C10H16N2O8/c13-7(14)3-11(4-8(15)16)1-2-12(5-9(17)18)6-10(19)20/h1-6H2,(H,13,14)(H,15,16)(H,17,18)(H,19,20)	174000	3.22519	1.9696	3.12519
Training	M42	60-51-5	InChI=1S/C5H12NO3PS2/c1-6-5(7)4-12-10(11,8-2)9-3/h4H2,1-3H3,(H,6,7)	2000	5.05929	5.55238	5.15929
Training	M43	60-57-1	InChI=1S/C12H8Cl6O/c13-8-9(14)11(16)5-3-1-2(6-7(3)19-6)4(5)10(8,15)12(11,17)18/h2-7H,1H2/t2-,3+,4-,5-,6+,7-,10-,11+/m0/s1	164.75	6.364	5.7968	6.264
Training	M44	61-82-5	InChI=1S/C2H4N4/c3-2-4-1-5-6-2/h1H,(H3,3,4,5,6)	36968.2	3.35686	2.23902	3.25686
Training	M45	62-53-3	InChI=1S/C6H7N/c7-6-4-2-1-3-5-6/h1-5H,7H2	385	5.38361	3.73136	4.15239
Test	M46	62-55-5	InChI=1S/C2H5NS/c1-2(3)4/h1H3,(H2,3,4)	17400	3.63528	3.57038	4.29926
Test	M47	62-56-6	InChI=1S/CH4N2S/c2-1(3)4/h(H4,2,3,4)	8999.99	3.92726	3.36314	3.78679
Training	M48	62-73-7	InChI=1S/C4H7Cl2O4P/c1-8-11(7,9-2)10-3-4(5)6/h3H,1-2H3	10.0079	7.344	5.39939	7.244
Test	M49	63-25-2	InChI=1S/C12H11NO2/c1-13-12(14)15-11-8-4-6-9-5-2-3-7-10(9)11/h2-8H,1H3,(H,13,14)	999.248	5.304	4.5127	3.9034
Training	M50	64-17-5	InChI=1S/C2H6O/c1-2-3/h3H,2H2,1H3	1.15297e+07	0.601586	2.29158	1.91323
Test	M51	64-18-6	InChI=1S/CH2O2/c2-1-3/h1H,(H,2,3)	151200	2.48345	2.16797	1.87887
Training	M52	64-19-7	InChI=1S/C2H4O2/c1-2(3)4/h1H3,(H,3,4)	60000	3.00038	2.39042	2.79461
Test	M53	65-85-0	InChI=1S/C7H6O2/c8-7(9)6-4-2-1-3-5-6/h1-5H,(H,8,9)	299999	2.60967	3.33161	3.25031
Training	M54	66-25-1	InChI=1S/C6H12O/c1-2-3-4-5-6-7/h6H,2-5H2,1H3	10300	3.98785	3.88904	3.96936
Test	M55	67-45-8	InChI=1S/C8H7N3O5/c12-8-10(3-4-15-8)9-5-6-1-2-7(16-6)11(13)14/h1-2,5H,3-4H2/b9-5+	59999.9	3.57434	3.57097	3.24778
Training	M56	67-56-1	InChI=1S/CH4O/c1-2/h2H,1H3	3.289e+06	0.988654	1.97216	1.3278
Training	M57	67-63-0	InChI=1S/C3H8O/c1-3(2)4/h3-4H,1-2H3	1.4e+06	1.63271	2.48852	1.73271
Training	M58	67-64-1	InChI=1S/C3H6O/c1-3(2)4/h1-2H3	6.90271e+06	0.925	3.05717	2.17131
Training	M59	67-66-3	InChI=1S/CHCl3/c2-1(3)4/h1H	263933	2.65543	4.37356	3.00202
Test	M60	67-72-1	InChI=1S/C2Cl6/c3-1(4,5)2(6,7)8	3671.11	4.80947	5.33394	5.37948
Training	M61	68-12-2	InChI=1S/C3H7NO/c1-4(2)3-5/h3H,1-2H3	1.3e+07	0.749937	2.74979	2.3473
Training	M62	68-22-4	InChI=1S/C20H26O2/c1-3-20(22)11-9-18-17-6-4-13-12-14(21)5-7-15(13)16(17)8-10-19(18,20)2/h1,12,15-18,22H,4-11H2,2H3/t15-,16+,17+,18+,19-,20+/m1/s1	4600	4.81207	4.72413	4.81979
Training	M63	68-35-9	InChI=1S/C10H10N4O2S/c11-8-2-4-9(5-3-8)17(15,16)14-10-12-6-1-7-13-10/h1-7H,11H2,(H,12,13,14)	154500	3.20949	3.28708	3.10949
Test	M64	69-72-7	InChI=1S/C7H6O3/c8-6-4-2-1-3-5(6)7(9)10/h1-4,8H,(H,9,10)	75300.2	3.26346	3.04346	3.3788
Training	M65	70-30-4	InChI=1S/C13H6Cl6O2/c14-6-2-8(16)12(20)4(10(6)18)1-5-11(19)7(15)3-9(17)13(5)21/h2-3,20-21H,1H2	198.165	6.31246	6.47954	6.21246
Test	M66	70-55-3	InChI=1S/C7H9NO2S/c1-6-2-4-7(5-3-6)11(8,9)10/h2-5H,1H3,(H2,8,9,10)	150000	3.05746	3.34952	3.47238
Training	M67	71-23-8	InChI=1S/C3H8O/c1-2-3-4/h4H,2-3H2,1H3	6.3e+06	0.979498	2.39991	1.44416
Test	M68	71-36-3	InChI=1S/C4H10O/c1-2-3-4-5/h5H,2-4H2,1H3	500000	2.17097	2.62639	1.71892
Training	M69	71-41-0	InChI=1S/C5H12O/c1-2-3-4-5-6/h6H,2-5H2,1H3	713595	2.09176	2.85059	2.19176
Training	M70	71-43-2	InChI=1S/C6H6/c1-2-4-6-5-3-1/h1-6H	31200	3.39856	4.13615	3.49856
Test	M71	71-55-6	InChI=1S/C2H3Cl3/c1-2(3,4)5/h1H3	481090	2.44294	4.87198	3.88532
Training	M72	72-14-0	InChI=1S/C9H9N3O2S2/c10-7-1-3-8(4-2-7)16(13,14)12-9-11-5-6-15-9/h1-6H,10H2,(H,11,12)	149300	3.23302	3.9044	3.33302
Training	M73	72-20-8	InChI=1S/C12H8Cl6O/c13-8-9(14)11(16)5-3-1-2(6-7(3)19-6)4(5)10(8,15)12(11,17)18/h2-7H,1H2/t2-,3+,4-,5?,6-,7+,10+,11-/m1/s1	83.2889	6.66023	5.7968	6.264
Training	M74	72-43-5	InChI=1S/C16H15Cl3O2/c1-20-13-7-3-11(4-8-13)15(16(17,18)19)12-5-9-14(21-2)10-6-12/h3-10,15H,1-2H3	34.39	7.0022	6.3572	7.05947
Training	M75	72-48-0	InChI=1S/C14H8O4/c15-10-6-5-9-11(14(10)18)13(17)8-4-2-1-3-7(8)12(9)16/h1-6,15,18H	50944.6	3.67349	3.58212	3.90428
Training	M76	72-54-8	InChI=1S/C14H10Cl4/c15-11-5-1-9(2-6-11)13(14(17)18)10-3-7-12(16)8-4-10/h1-8,13-14H	9	7.55096	6.46208	7.45096
Training	M77	74-83-9	InChI=1S/CH3Br/c1-2/h1H3	2599.99	4.56247	4.70266	4.61371
Test	M78	74-87-3	InChI=1S/CH3Cl/c1-2/h1H3	199998	2.40216	3.70798	4.00988
Training	M79	74-89-5	InChI=1S/CH5N/c1-2/h2H2,1H3	163000	2.27997	2.33832	2.38415
Test	M80	75-05-8	InChI=1S/C2H3N/c1-2-3/h1H3	100000	2.61333	2.94044	2.40351
Training	M81	75-07-0	InChI=1S/C2H4O/c1-2-3/h2H,1H3	48000	2.96273	2.9924	2.72179
Training	M82	75-08-1	InChI=1S/C2H6S/c1-2-3/h3H,2H2,1H3	170	5.56288	4.17051	5.306
Training	M83	75-09-2	InChI=1S/CH2Cl2/c2-1-3/h1H2	134999	2.79874	4.15522	3.11677
Training	M84	75-15-0	InChI=1S/CS2/c2-1-3	2099.99	4.5594	3.83598	4.4594
Training	M85	75-21-8	InChI=1S/C2H4O/c1-2-3-1/h1-2H2	137000	2.50725	2.71431	2.60725
Training	M86	75-25-2	InChI=1S/CHBr3/c2-1(3)4/h1H	46000	3.7399	5.97434	3.8399
Training	M87	75-31-0	InChI=1S/C3H9N/c1-3(2)4/h3H,4H2,1-2H3	91600	2.80977	2.90757	2.90977
Test	M88	75-34-3	InChI=1S/C2H4Cl2/c1-2(3)4/h2H,1H3	92000.2	3.03167	4.39309	3.3888
Training	M89	75-35-4	InChI=1S/C2H2Cl2/c1-2(3)4/h1H2	45300.1	3.33042	4.42409	3.43042
Training	M90	75-56-9	InChI=1S/C3H6O/c1-3-2-4-3/h3H,2H2,1H3/t3-/m1/s1	350000	2.21995	2.98485	2.52954
Training	M91	75-68-3	InChI=1S/C2H3ClF2/c1-2(3,4)5/h1H3	190000	2.72339	4.39263	2.82339
Test	M92	75-87-6	InChI=1S/C2HCl3O/c3-2(4,5)1-6/h1H	112000	3.11924	4.3368	4.02312
Test	M93	76-01-7	InChI=1S/C2HCl5/c3-1(4)2(5,6)7/h1H	26100	3.88934	5.20786	4.87259
Training	M94	76-03-9	InChI=1S/C2HCl3O2/c3-2(4,5)1(6)7/h(H,6,7)	1.5365e+06	2.02668	3.77122	2.87559
Training	M95	76-06-2	InChI=1S/CCl3NO2/c2-1(3,4)5(6)7	530	5.49156	4.73408	5.39156
Test	M96	76-44-8	InChI=1S/C10H5Cl7/c11-4-2-1-3-5(4)9(15)7(13)6(12)8(3,14)10(9,16)17/h1-5H/t3-,4-,5-,8-,9+/m0/s1	89.8175	6.61872	6.26258	6.72497
Test	M97	77-06-5	InChI=1S/C19H22O6/c1-9-7-17-8-18(9,24)5-3-10(17)19-6-4-11(20)16(2,15(23)25-19)13(19)12(17)14(21)22/h4,6,10-13,20,24H,1,3,5,7-8H2,2H3,(H,21,22)/t10-,11-,12+,13-,16+,17-,18-,19+/m0/s1	22500	4.18736	3.18737	3.02226
Training	M98	77-47-4	InChI=1S/C5Cl6/c6-1-2(7)4(9)5(10,11)3(1)8	45.6	6.77683	5.47488	6.42942
Training	M99	77-73-6	InChI=1S/C10H12/c1-2-9-7-4-5-8(6-7)10(9)3-1/h1-2,4-5,7-10H,3,6H2/t7-,8+,9-,10+/m1/s1	10500	4.10005	4.52401	4.20005
Test	M100	77-78-1	InChI=1S/C2H6O4S/c1-5-7(3,4)6-2/h1-2H3	17000	3.87038	2.97155	3.48178
Test	M101	77-99-6	InChI=1S/C6H14O3/c1-2-6(3-7,4-8)5-9/h7-9H,2-5H2,1H3	1.3e+07	1.01372	1.98629	2.0186
Training	M102	78-34-2	InChI=1S/C12H26O6P2S4/c1-5-15-19(21,16-6-2)23-11-12(14-10-9-13-11)24-20(22,17-7-3)18-8-4/h11-12H,5-10H2,1-4H3/t11-,12+	0.35	9.11541	9.18573	8.20584
Training	M103	78-48-8	InChI=1S/C12H27OPS3/c1-4-7-10-15-14(13,16-11-8-5-2)17-12-9-6-3/h4-12H2,1-3H3	120	6.41845	7.91683	6.31845
Training	M104	78-59-1	InChI=1S/C9H14O/c1-7-4-8(10)6-9(2,3)5-7/h4H,5-6H2,1-3H3	120000	3.06135	4.60044	3.62956
Training	M105	78-67-1	InChI=1S/C8H12N4/c1-7(2,5-9)11-12-8(3,4)6-10/h1-4H3/b12-11+	10000	4.21539	4.31015	4.11539
Training	M106	78-70-6	InChI=1S/C10H18O/c1-5-10(4,11)8-6-7-9(2)3/h5,7,11H,1,6,8H2,2-4H3/t10-/m0/s1	20000	3.88719	4.35438	3.98719
Training	M107	78-83-1	InChI=1S/C4H10O/c1-4(2)3-5/h4-5H,3H2,1-2H3	1.03e+06	1.85711	2.7385	2.26087
Test	M108	78-87-5	InChI=1S/C3H6Cl2/c1-3(5)2-4/h3H,2H2,1H3/t3-/m0/s1	49500	3.35842	4.41119	3.17636
Training	M109	78-92-2	InChI=1S/C4H10O/c1-3-4(2)5/h4-5H,3H2,1-2H3/t4-/m0/s1	4.227e+06	1.24391	2.64548	1.60031
Test	M110	78-93-3	InChI=1S/C4H8O/c1-3-4(2)5/h3H2,1-2H3	5.091e+06	1.15117	3.26705	2.74867
Training	M111	78-99-9	InChI=1S/C3H6Cl2/c1-2-3(4)5/h3H,2H2,1H3	23000	3.6913	4.4233	3.5913
Training	M112	79-00-5	InChI=1S/C2H3Cl3/c3-1-2(4)5/h2H,1H2	18000	3.8699	4.67666	3.7699
Training	M113	79-01-6	InChI=1S/C2HCl3/c3-1-2(4)5/h1H	18000	3.86328	4.62093	3.96328
Test	M114	79-06-1	InChI=1S/C3H5NO/c1-2-3(4)5/h2H,1H2,(H2,4,5)	160000	2.64761	2.70444	2.45633
Training	M115	79-09-4	InChI=1S/C3H6O2/c1-2-3(4)5/h2H2,1H3,(H,4,5)	40333.3	3.26403	2.60043	3.15893
Training	M116	79-10-7	InChI=1S/C3H4O2/c1-2-3(4)5/h2H,1H2,(H,4,5)	47000	3.18561	2.68554	3.08561
Training	M117	79-11-8	InChI=1S/C2H3ClO2/c3-1-2(4)5/h1H2,(H,4,5)	76333.2	3.0927	2.86154	3.10666
Training	M118	79-20-9	InChI=1S/C3H6O2/c1-3(4)5-2/h1-2H3	1.027e+06	1.85812	2.98668	2.4396
Test	M119	79-31-2	InChI=1S/C4H8O2/c1-3(2)4(5)6/h3H,1-2H3,(H,5,6)	51250	3.23531	2.90244	2.90751
Training	M120	79-34-5	InChI=1S/C2H2Cl4/c3-1(4)2(5)6/h1-2H	39316.7	3.63034	4.96418	3.76145
Training	M121	79-39-0	InChI=1S/C4H7NO/c1-3(2)4(5)6/h1H2,2H3,(H2,5,6)	1e+06	1.92995	2.99394	2.21772
Test	M122	79-41-4	InChI=1S/C4H6O2/c1-3(2)4(5)6/h1H2,2H3,(H,5,6)	150000	2.75886	2.95568	2.79946
Test	M123	79-57-2	InChI=1S/C22H24N2O9/c1-21(32)7-5-4-6-8(25)9(7)15(26)10-12(21)17(28)13-14(24(2)3)16(27)11(20(23)31)19(30)22(13,33)18(10)29/h4-6,12-14,17,25-26,28,31-33H,23H2,1-3H3/b20-11-/t12-,13-,14+,17+,21-,22+/m1/s1	102000	3.65457	3.1398	2.71996
Training	M124	79-92-5	InChI=1S/C10H16/c1-7-8-4-5-9(6-8)10(7,2)3/h8-9H,1,4-6H2,2-3H3/t8-,9-/m1/s1	13000	4.02034	5.05821	4.18509
Test	M125	80-05-7	InChI=1S/C15H16O2/c1-15(2,11-3-7-13(16)8-4-11)12-5-9-14(17)10-6-12/h3-10,16-17H,1-2H3	7049.99	4.51029	5.01792	4.46938
Training	M126	80-06-8	InChI=1S/C14H12Cl2O/c1-14(17,10-2-6-12(15)7-3-10)11-4-8-13(16)9-5-11/h2-9,17H,1H3	270	5.99539	4.82563	5.89539
Training	M127	80-62-6	InChI=1S/C5H8O2/c1-4(2)5(6)7-3/h1H2,2-3H3	69000.1	3.16165	3.55754	3.26165
Training	M128	81-11-8	InChI=1S/C14H14N2O6S2/c15-11-5-3-9(13(7-11)23(17,18)19)1-2-10-4-6-12(16)8-14(10)24(20,21)22/h1-8H,15-16H2,(H,17,18,19)(H,20,21,22)/b2-1-	210000	3.24645	3.6374	3.14645
Training	M129	81-14-1	InChI=1S/C14H18N2O5/c1-7-10(9(3)17)8(2)13(16(20)21)11(14(4,5)6)12(7)15(18)19/h1-6H3	460	5.80604	5.66007	5.90604
Training	M130	81-15-2	InChI=1S/C12H15N3O6/c1-6-9(13(16)17)7(2)11(15(20)21)8(12(3,4)5)10(6)14(18)19/h1-5H3	150	6.29705	5.73235	6.19705
Training	M131	81-54-9	InChI=1S/C14H8O5/c15-8-5-9(16)14(19)11-10(8)12(17)6-3-1-2-4-7(6)13(11)18/h1-5,15-16,19H	767.66	5.52343	3.3694	5.42343
Training	M132	81-61-8	InChI=1S/C14H8O6/c15-6-3-4-7(16)11-10(6)12(18)5-1-2-8(17)13(19)9(5)14(11)20/h1-4,15-17,19H	2517.05	5.03401	2.86884	4.93401
Training	M133	81-64-1	InChI=1S/C14H8O4/c15-9-5-6-10(16)12-11(9)13(17)7-3-1-2-4-8(7)14(12)18/h1-6,15-16H	510.865	5.67229	3.34224	5.20589
Test	M134	81-81-2	InChI=1S/C19H16O4/c1-12(20)11-15(13-7-3-2-4-8-13)17-18(21)14-9-5-6-10-16(14)23-19(17)22/h2-10,15,21H,11H2,1H3/t15-/m1/s1	88801.9	3.54059	4.93347	4.24076
Test	M135	82-66-6	InChI=1S/C23H16O3/c24-21-17-13-7-8-14-18(17)22(25)20(21)23(26)19(15-9-3-1-4-10-15)16-11-5-2-6-12-16/h1-14,19-20H	1800	5.27668	5.73241	4.79261
Test	M136	82-68-8	InChI=1S/C6Cl5NO2/c7-1-2(8)4(10)6(12(13)14)5(11)3(1)9	770	5.58382	5.97328	6.59258
Training	M137	83-32-9	InChI=1S/C12H10/c1-3-9-4-2-6-11-8-7-10(5-1)12(9)11/h1-6H,7-8H2	7910.84	4.28988	4.97944	4.38988
Training	M138	83-41-0	InChI=1S/C8H9NO2/c1-6-4-3-5-8(7(6)2)9(10)11/h3-5H,1-2H3	4200.01	4.5562	4.36897	4.27868
Training	M139	83-42-1	InChI=1S/C7H6ClNO2/c1-5-6(8)3-2-4-7(5)9(10)11/h2-4H,1H3	4200	4.61122	4.57414	4.42086
Training	M140	84-11-7	InChI=1S/C14H8O2/c15-13-11-7-3-1-5-9(11)10-6-2-4-8-12(10)14(13)16/h1-8H	8263.04	4.40137	4.68436	4.3675
Test	M141	84-65-1	InChI=1S/C14H8O2/c15-13-9-5-1-2-6-10(9)14(16)12-8-4-3-7-11(12)13/h1-8H	8441.48	4.39209	4.45955	4.03532
Training	M142	84-66-2	InChI=1S/C12H14O4/c1-3-15-11(13)9-7-5-6-8-10(9)12(14)16-4-2/h5-8H,3-4H2,1-2H3	54235	3.61254	4.50531	3.71254
Test	M143	84-74-2	InChI=1S/C16H22O4/c1-3-5-11-19-15(17)13-9-7-8-10-14(13)16(18)20-12-6-4-2/h7-10H,3-6,11-12H2,1-2H3	3399.99	4.9131	5.14309	4.98295
Training	M144	84-75-3	InChI=1S/C20H30O4/c1-3-5-7-11-15-23-19(21)17-13-9-10-14-18(17)20(22)24-16-12-8-6-4-2/h9-10,13-14H,3-8,11-12,15-16H2,1-2H3	180	6.26906	6.02778	6.36906
Test	M145	85-01-8	InChI=1S/C14H10/c1-3-7-13-11(5-1)9-10-12-6-2-4-8-14(12)13/h1-10H	212	5.92464	5.757	5.46002
Training	M146	85-34-7	InChI=1S/C8H5Cl3O2/c9-5-1-2-6(10)8(11)4(5)3-7(12)13/h1-2H,3H2,(H,12,13)	4500	4.72606	4.31001	4.62606
Test	M147	85-41-6	InChI=1S/C8H5NO2/c10-7-5-3-1-2-4-6(5)8(11)9-7/h1-4H,(H,9,10,11)	39000.1	3.57664	3.22812	2.97123
Test	M148	85-68-7	InChI=1S/C19H20O4/c1-2-3-13-22-18(20)16-11-7-8-12-17(16)19(21)23-14-15-9-5-4-6-10-15/h4-12H,2-3,13-14H2,1H3	1800	5.23938	5.48706	5.34463
Training	M149	86-30-6	InChI=1S/C12H10N2O/c15-13-14(11-7-3-1-4-8-11)12-9-5-2-6-10-12/h1-10H	7800.02	4.40505	4.84821	4.50505
Test	M150	86-50-0	InChI=1S/C10H12N3O3PS2/c1-15-17(18,16-2)19-7-13-10(14)8-5-3-4-6-9(8)11-12-13/h3-6H,7H2,1-2H3	1.62857	8.2897	6.566	7.26394
Training	M151	86-73-7	InChI=1S/C13H10/c1-3-7-12-10(5-1)9-11-6-2-4-8-13(11)12/h1-8H,9H2	429.999	5.58721	5.28614	5.28626
Training	M152	86-74-8	InChI=1S/C12H9N/c1-3-7-11-9(5-1)10-6-2-4-8-12(10)13-11/h1-8,13H	3370.33	4.69558	4.70277	4.59558
Training	M153	86-81-7	InChI=1S/C10H12O4/c1-12-8-4-7(6-11)5-9(13-2)10(8)14-3/h4-6H,1-3H3	120698	3.211	3.67112	3.311
Test	M154	86-87-3	InChI=1S/C12H10O2/c13-12(14)8-10-6-3-5-9-4-1-2-7-11(9)10/h1-7H,8H2,(H,13,14)	360001	2.71369	4.26881	3.85353
Training	M155	87-56-9	InChI=1S/C4H2Cl2O3/c5-2(1-7)3(6)4(8)9/h1H,(H,8,9)/b3-2-	13000	4.11385	3.50503	3.52998
Training	M156	87-61-6	InChI=1S/C6H3Cl3/c7-4-2-1-3-5(8)6(4)9/h1-3H	1440	5.10039	5.1437	5.0677
Training	M157	87-65-0	InChI=1S/C6H4Cl2O/c7-4-2-1-3-5(8)6(4)9/h1-3,9H	3400	4.68071	4.15664	4.78071
Test	M158	87-68-3	InChI=1S/C4Cl6/c5-1(3(7)8)2(6)4(9)10	500	5.71727	5.77211	6.4051
Training	M159	87-86-5	InChI=1S/C6HCl5O/c7-1-2(8)4(10)6(12)5(11)3(1)9/h12H	450	5.77222	5.15576	5.71368
Test	M160	88-04-0	InChI=1S/C8H9ClO/c1-5-3-7(10)4-6(2)8(5)9/h3-4,10H,1-2H3	6700	4.36874	3.98427	4.23776
Test	M161	88-06-2	InChI=1S/C6H3Cl3O/c7-3-1-4(8)6(10)5(9)2-3/h1-2,10H	3345.4	4.771	4.50941	5.49812
Training	M162	88-12-0	InChI=1S/C6H9NO/c1-2-7-5-3-4-6(7)8/h2H,1,3-5H2	45000.1	3.39266	3.28535	3.45431
Test	M163	88-19-7	InChI=1S/C7H9NO2S/c1-6-4-2-3-5-7(6)11(8,9)10/h2-5H,1H3,(H2,8,9,10)	210000	2.91133	3.30148	3.33177
Training	M164	88-44-8	InChI=1S/C7H9NO3S/c1-5-2-3-6(8)7(4-5)12(9,10)11/h2-4H,8H2,1H3,(H,9,10,11)	10000	4.27234	3.5543	4.17234
Test	M165	88-60-8	InChI=1S/C11H16O/c1-8-5-6-9(10(12)7-8)11(2,3)4/h5-7,12H,1-4H3	2770	4.77301	4.69437	4.70866
Test	M166	88-72-2	InChI=1S/C7H7NO2/c1-6-4-2-3-5-7(6)8(9)10/h2-5H,1H3	8800	4.19267	4.14849	4.16209
Training	M167	88-73-3	InChI=1S/C6H4ClNO2/c7-5-3-1-2-4-6(5)8(9)10/h1-4H	23800	3.82085	4.43907	4.07265
Training	M168	88-74-4	InChI=1S/C6H6N2O2/c7-5-3-1-2-4-6(5)8(9)10/h1-4H,7H2	10000	4.14027	3.71021	4.04027
Training	M169	88-75-5	InChI=1S/C6H5NO3/c8-6-4-2-1-3-5(6)7(9)10/h1-4,8H	15085	3.96481	3.57697	3.95324
Training	M170	88-85-7	InChI=1S/C10H12N2O5/c1-3-6(2)8-4-7(11(14)15)5-9(10(8)13)12(16)17/h4-6,13H,3H2,1-2H3/t6-/m0/s1	240	6.00038	4.67144	5.90038
Training	M171	88-89-1	InChI=1S/C6H3N3O7/c10-6-4(8(13)14)1-3(7(11)12)2-5(6)9(15)16/h1-2,10H	85000	3.43061	4.11005	3.94689
Training	M172	89-59-8	InChI=1S/C7H6ClNO2/c1-5-2-3-6(8)4-7(5)9(10)11/h2-4H,1H3	9200	4.27068	4.57414	4.42086
Training	M173	89-61-2	InChI=1S/C6H3Cl2NO2/c7-4-1-2-5(8)6(3-4)9(10)11/h1-3H	11000	4.24191	4.86537	4.63404
Training	M174	89-63-4	InChI=1S/C6H5ClN2O2/c7-4-1-2-5(8)6(3-4)9(10)11/h1-3H,8H2	3200	4.73181	4.17992	4.63181
Training	M175	90-02-8	InChI=1S/C7H6O2/c8-5-6-3-1-2-4-7(6)9/h1-5,9H	4357.49	4.44755	3.10489	4.1172
Training	M176	90-04-0	InChI=1S/C7H9NO/c1-9-7-5-3-2-4-6(7)8/h2-5H,8H2,1H3	12000	4.01126	3.55506	4.11126
Test	M177	90-05-1	InChI=1S/C7H8O2/c1-9-7-5-3-2-4-6(7)8/h2-5,8H,1H3	25950	3.67976	3.26997	4.37641
Training	M178	90-12-0	InChI=1S/C11H10/c1-9-5-4-7-10-6-2-3-8-11(9)10/h2-8H,1H3	1848	4.88619	5.16827	4.92829
Training	M179	90-13-1	InChI=1S/C10H7Cl/c11-10-7-3-5-8-4-1-2-6-9(8)10/h1-7H	1600	5.00704	5.04122	4.90704
Training	M180	90-43-7	InChI=1S/C12H10O/c13-12-9-5-4-8-11(12)10-6-2-1-3-7-10/h1-9,13H	2700	4.79961	4.56734	4.88747
Training	M181	91-15-6	InChI=1S/C8H4N2/c9-5-7-3-1-2-4-8(7)6-10/h1-4H	211000	2.78337	3.56901	2.88337
Test	M182	91-20-3	InChI=1S/C10H8/c1-2-6-10-8-4-3-7-9(10)5-1/h1-8H	10255.2	4.09685	4.94725	4.64434
Training	M183	91-22-5	InChI=1S/C9H7N/c1-2-6-9-8(4-1)5-3-7-10-9/h1-7H	34500.1	3.5733	3.88577	3.6733
Test	M184	91-53-2	InChI=1S/C14H19NO/c1-5-16-11-6-7-13-12(8-11)10(2)9-14(3,4)15-13/h6-9,15H,5H2,1-4H3	2000	5.03604	5.33567	4.93355
Training	M185	91-64-5	InChI=1S/C9H6O2/c10-9-6-5-7-3-1-2-4-8(7)11-9/h1-6H	13500	4.03444	4.08811	4.12248
Test	M186	91-76-9	InChI=1S/C9H9N5/c10-8-12-7(13-9(11)14-8)6-4-2-1-3-5-6/h1-5H,(H4,10,11,12,13,14)	51999.9	3.55631	3.42314	3.2755
Test	M187	91-94-1	InChI=1S/C12H10Cl2N2/c13-9-5-7(1-3-11(9)15)8-2-4-12(16)10(14)6-8/h1-6H,15-16H2	1050	5.38215	5.17559	5.17008
Training	M188	92-24-0	InChI=1S/C18H12/c1-2-6-14-10-18-12-16-8-4-3-7-15(16)11-17(18)9-13(14)5-1/h1-12H	66.0973	6.5383	6.56815	6.80474
Training	M189	92-52-4	InChI=1S/C12H10/c1-3-7-11(8-4-1)12-9-5-2-6-10-12/h1-10H	2147.78	4.85612	5.41281	5.0157
Training	M190	92-69-3	InChI=1S/C12H10O/c13-12-8-6-11(7-9-12)10-4-2-1-3-5-10/h1-9,13H	3660	4.6675	4.65511	4.6487
Training	M191	92-70-6	InChI=1S/C11H8O3/c12-10-6-8-4-2-1-3-7(8)5-9(10)11(13)14/h1-6,12H,(H,13,14)	106000	3.24927	3.85335	3.6689
Training	M192	92-87-5	InChI=1S/C12H12N2/c13-11-5-1-9(2-6-11)10-3-7-12(14)8-4-10/h1-8H,13-14H2	600	5.48723	4.328	5.20988
Test	M193	92-88-6	InChI=1S/C12H10O2/c13-11-5-1-9(2-6-11)10-3-7-12(14)8-4-10/h1-8,13-14H	4975.01	4.5732	4.27221	3.49849
Training	M194	93-02-7	InChI=1S/C9H10O3/c1-11-8-3-4-9(12-2)7(5-8)6-10/h3-6H,1-2H3	22992.1	3.85898	3.79597	3.75898
Training	M195	93-65-2	InChI=1S/C10H11ClO3/c1-6-5-8(11)3-4-9(6)14-7(2)10(12)13/h3-5,7H,1-2H3,(H,12,13)/t7-/m0/s1	100000	3.33172	4.22088	3.43172
Training	M196	93-72-1	InChI=1S/C9H7Cl3O3/c1-4(9(13)14)15-8-3-6(11)5(10)2-7(8)12/h2-4H,1H3,(H,13,14)/t4-/m1/s1	140000	3.28445	4.90481	4.29337
Training	M197	93-76-5	InChI=1S/C8H5Cl3O3/c9-4-1-6(11)7(2-5(4)10)14-3-8(12)13/h1-2H,3H2,(H,12,13)	5000	4.70839	4.6854	4.60839
Test	M198	94-36-0	InChI=1S/C14H10O4/c15-13(11-7-3-1-4-8-11)17-18-14(16)12-9-5-2-6-10-12/h1-10H	1490	5.21104	4.9173	4.12992
Training	M199	94-74-6	InChI=1S/C9H9ClO3/c1-6-4-7(10)2-3-8(6)13-5-9(11)12/h2-4H,5H2,1H3,(H,11,12)	100000	3.30237	3.94184	3.40237
Test	M200	94-75-7	InChI=1S/C8H6Cl2O3/c9-5-1-2-7(6(10)3-5)13-4-8(11)12/h1-3H,4H2,(H,11,12)	82909.3	3.42586	4.25734	3.73183
Training	M201	94-81-5	InChI=1S/C11H13ClO3/c1-8-7-9(12)4-5-10(8)15-6-2-3-11(13)14/h4-5,7H,2-3,6H2,1H3,(H,13,14)	55000	3.61885	4.23083	3.54128
Training	M202	94-82-6	InChI=1S/C10H10Cl2O3/c11-7-3-4-9(8(12)6-7)15-5-1-2-10(13)14/h3-4,6H,1-2,5H2,(H,13,14)	25000	3.99842	4.54567	4.09842
Training	M203	95-15-8	InChI=1S/C8H6S/c1-2-4-8-7(3-1)5-6-9-8/h1-6H	2900	4.66535	4.48896	4.3538
Training	M204	95-25-0	InChI=1S/C7H4ClNO2/c8-4-1-2-6-5(3-4)9-7(10)11-6/h1-3H,(H,9,10)	6600	4.40979	3.82534	3.95837
Training	M205	95-31-8	InChI=1S/C11H14N2S2/c1-11(2,3)13-15-10-12-8-6-4-5-7-9(8)14-10/h4-7,13H,1-3H3	345	5.83944	5.26064	5.73944
Test	M206	95-47-6	InChI=1S/C8H10/c1-7-5-3-4-6-8(7)2/h3-6H,1-2H3	14080	3.87738	4.56391	3.67882
Training	M207	95-48-7	InChI=1S/C7H8O/c1-6-4-2-3-5-7(6)8/h2-5,8H,1H3	5000.01	4.33501	3.54539	4.23501
Training	M208	95-49-8	InChI=1S/C7H7Cl/c1-6-4-2-3-5-7(6)8/h2-5H,1H3	20000	3.80135	4.48244	4.29502
Training	M209	95-50-1	InChI=1S/C6H4Cl2/c7-5-3-1-2-4-6(5)8/h1-4H	2200	4.8249	4.7437	4.87553
Training	M210	95-51-2	InChI=1S/C6H6ClN/c7-5-3-1-2-4-6(5)8/h1-4H,8H2	816.667	5.19371	4.2053	5.11415
Test	M211	95-53-4	InChI=1S/C7H9N/c1-6-4-2-3-5-7(6)8/h2-5H,8H2,1H3	520	5.314	3.9013	4.07763
Training	M212	95-56-7	InChI=1S/C6H5BrO/c7-5-3-1-2-4-6(5)8/h1-4,8H	900	5.28382	4.18021	5.11778
Training	M213	95-57-8	InChI=1S/C6H5ClO/c7-5-3-1-2-4-6(5)8/h1-4,8H	2600	4.69412	3.77647	4.61389
Test	M214	95-68-1	InChI=1S/C8H11N/c1-6-3-4-8(9)7(2)5-6/h3-5H,9H2,1-2H3	9900.03	4.08779	4.11784	4.15696
Training	M215	95-73-8	InChI=1S/C7H6Cl2/c1-5-2-3-6(8)4-7(5)9/h2-4H,1H3	600	5.42875	4.87632	5.05163
Training	M216	95-74-9	InChI=1S/C7H8ClN/c1-5-2-3-6(9)4-7(5)8/h2-4H,9H2,1H3	620	5.35867	4.31644	4.96501
Training	M217	95-76-1	InChI=1S/C6H5Cl2N/c7-5-2-1-4(9)3-6(5)8/h1-3H,9H2	3727.96	4.63809	4.63889	4.89475
Training	M218	95-82-9	InChI=1S/C6H5Cl2N/c7-4-1-2-5(8)6(9)3-4/h1-3H,9H2	2920	4.74418	4.63889	4.89475
Training	M219	95-87-4	InChI=1S/C8H10O/c1-6-3-4-7(2)8(9)5-6/h3-5,9H,1-2H3	9999.97	4.08694	3.75054	4.05487
Training	M220	95-95-4	InChI=1S/C6H3Cl3O/c7-3-1-5(9)6(10)2-4(3)8/h1-2,10H	900	5.34121	4.58279	5.44121
Training	M221	96-09-3	InChI=1S/C8H8O/c1-2-4-7(5-3-1)8-6-9-8/h1-5,8H,6H2/t8-/m1/s1	11600	4.01526	3.82842	3.84628
Training	M222	96-13-9	InChI=1S/C3H6Br2O/c4-1-3(5)2-6/h3,6H,1-2H2/t3-/m1/s1	338000	2.80931	4.3952	2.90931
Training	M223	96-14-0	InChI=1S/C6H14/c1-4-6(3)5-2/h6H,4-5H2,1-3H3	1203	4.85512	4.38189	4.75512
Training	M224	96-18-4	InChI=1S/C3H5Cl3/c4-1-3(6)2-5/h3H,1-2H2	33800	3.63967	4.79287	3.73967
Test	M225	96-29-7	InChI=1S/C4H9NO/c1-3-4(2)5-6/h6H,3H2,1-2H3/b5-4-	100000	2.94012	3.10513	3.31918
Training	M226	96-31-1	InChI=1S/C3H8N2O/c1-4-3(6)5-2/h1-2H3,(H2,4,5,6)	500000	2.24605	2.46023	2.34605
Training	M227	96-33-3	InChI=1S/C4H6O2/c1-3-4(5)6-2/h3H,1H2,2H3	2600	4.51998	3.27543	3.81049
Test	M228	96-45-7	InChI=1S/C3H6N2S/c6-3-4-1-2-5-3/h1-2H2,(H2,4,5,6)	24666.7	3.61716	3.565	3.77689
Test	M229	97-00-7	InChI=1S/C6H3ClN2O4/c7-5-2-1-4(8(10)11)3-6(5)9(12)13/h1-3H	800	5.40345	4.5449	4.79461
Test	M230	97-02-9	InChI=1S/C6H5N3O4/c7-5-2-1-4(8(10)11)3-6(5)9(12)13/h1-3H,7H2	9600.02	4.28047	3.82561	4.33264
Test	M231	97-18-7	InChI=1S/C12H6Cl4O2S/c13-5-1-7(15)11(17)9(3-5)19-10-4-6(14)2-8(16)12(10)18/h1-4,17-18H	300	6.07439	5.94703	6.14845
Training	M232	97-23-4	InChI=1S/C13H10Cl2O2/c14-10-1-3-12(16)8(6-10)5-9-7-11(15)2-4-13(9)17/h1-4,6-7,16-17H,5H2	6200	4.63756	4.80689	4.73756
Test	M233	97-50-7	InChI=1S/C8H10ClNO2/c1-11-7-4-8(12-2)6(10)3-5(7)9/h3-4H,10H2,1-2H3	1620.01	5.06377	4.06465	4.43026
Training	M234	97-74-5	InChI=1S/C6H12N2S3/c1-7(2)5(9)11-6(10)8(3)4/h1-4H3	2900	4.85643	5.52582	4.95643
Test	M235	97-77-8	InChI=1S/C10H20N2S4/c1-5-11(6-2)9(13)15-16-10(14)12(7-3)8-4/h5-8H2,1-4H3	120	6.3929	7.09219	7.54022
Training	M236	97-86-9	InChI=1S/C8H14O2/c1-6(2)5-10-8(9)7(3)4/h6H,3,5H2,1-2,4H3	32000.1	3.64774	4.28898	3.74774
Test	M237	98-01-1	InChI=1S/C5H4O2/c6-4-5-2-1-3-7-5/h1-4H	20400	3.67302	3.2515	2.82826
Training	M238	98-07-7	InChI=1S/C7H5Cl3/c8-7(9,10)6-4-2-1-3-5-6/h1-5H	100000	3.29109	5.19856	4.33376
Test	M239	98-16-8	InChI=1S/C7H6F3N/c8-7(9,10)5-2-1-3-6(11)4-5/h1-4H,11H2	2699.99	4.7758	3.96333	3.8829
Training	M240	98-54-4	InChI=1S/C10H14O/c1-10(2,3)8-4-6-9(11)7-5-8/h4-7,11H,1-3H3	3400.01	4.64524	4.57495	4.54524
Training	M241	98-59-9	InChI=1S/C7H7ClO2S/c1-6-2-4-7(5-3-6)11(8,9)10/h2-5H,1H3	70000	3.43513	4.58356	3.53513
Training	M242	98-82-8	InChI=1S/C9H12/c1-8(2)9-6-4-3-5-7-9/h3-8H,1-2H3	600.002	5.30172	4.94019	4.60433
Training	M243	98-83-9	InChI=1S/C9H10/c1-8(2)9-6-4-3-5-7-9/h3-7H,1H2,2H3	3651.01	4.51012	4.95839	4.43669
Training	M244	98-92-0	InChI=1S/C6H6N2O/c7-6(9)5-2-1-3-8-4-5/h1-4H,(H2,7,9)	1e+06	2.0868	2.59424	2.43864
Training	M245	98-95-3	InChI=1S/C6H5NO2/c8-7(9)6-4-2-1-3-5-6/h1-5H	7199.98	4.23296	3.97241	4.16603
Training	M246	99-02-5	InChI=1S/C8H7ClO/c1-6(10)7-3-2-4-8(9)5-7/h2-5H,1H3	52000	3.47319	4.32199	3.57319
Training	M247	99-04-7	InChI=1S/C8H8O2/c1-6-3-2-4-7(5-6)8(9)10/h2-5H,1H3,(H,9,10)	75000.1	3.25895	3.54371	3.35895
Training	M248	99-08-1	InChI=1S/C7H7NO2/c1-6-4-2-3-5-7(6)8(9)10/h2-5H,1H3	7500	4.26209	4.14849	4.16209
Training	M249	99-09-2	InChI=1S/C6H6N2O2/c7-5-2-1-3-6(4-5)8(9)10/h1-4H,7H2	980	5.14904	3.49875	4.22299
Training	M250	99-30-9	InChI=1S/C6H4Cl2N2O2/c7-4-1-3(10(11)12)2-5(8)6(4)9/h1-2H,9H2	2070	5.00003	4.46775	5.0622
Training	M251	99-35-4	InChI=1S/C6H3N3O6/c10-7(11)4-1-5(8(12)13)3-6(2-4)9(14)15/h1-3H	2840.01	4.87527	4.16836	4.79227
Training	M252	99-51-4	InChI=1S/C8H9NO2/c1-6-3-4-8(9(10)11)5-7(6)2/h3-5H,1-2H3	16000	3.97532	4.41701	4.07532
Training	M253	99-54-7	InChI=1S/C6H3Cl2NO2/c7-5-2-1-4(9(10)11)3-6(5)8/h1-3H	3000	4.80618	4.86537	4.63404
Training	M254	99-55-8	InChI=1S/C7H8N2O2/c1-5-2-3-6(9(10)11)4-7(5)8/h2-4H,8H2,1H3	22500.1	3.83009	3.98896	4.06961
Training	M255	99-65-0	InChI=1S/C6H4N2O4/c9-7(10)5-2-1-3-6(4-5)8(11)12/h1-4H	43011.6	3.592	4.04361	4.78512
Test	M256	99-86-5	InChI=1S/C10H16/c1-8(2)10-6-4-9(3)5-7-10/h4,6,8H,5,7H2,1-3H3	1850	4.86711	5.06318	4.76636
Training	M257	99-87-6	InChI=1S/C10H14/c1-8(2)10-6-4-9(3)5-7-10/h4-8H,1-3H3	6499.99	4.3149	5.15355	4.55768
Training	M258	99-91-2	InChI=1S/C8H7ClO/c1-6(10)7-2-4-8(9)5-3-7/h2-5H,1H3	52000	3.47319	4.32199	3.57319
Training	M259	99-92-3	InChI=1S/C8H9NO/c1-6(10)7-2-4-8(9)5-3-7/h2-5H,9H2,1H3	4999.99	4.43189	3.42957	3.76332
Test	M260	99-93-4	InChI=1S/C8H8O2/c1-6(9)7-2-4-8(10)5-3-7/h2-5,10H,1H3	27798.3	3.68999	3.28458	3.32859
Training	M261	99-96-7	InChI=1S/C7H6O3/c8-6-3-1-5(2-4-6)7(9)10/h1-4,8H,(H,9,10)	135700	3.00768	3.06936	2.90768
Training	M262	99-99-0	InChI=1S/C7H7NO2/c1-6-2-4-7(5-3-6)8(9)10/h2-5H,1H3	13516.7	4.00628	4.19653	4.09864
Training	M263	100-00-5	InChI=1S/C6H4ClNO2/c7-5-1-3-6(4-2-5)8(9)10/h1-4H	7500	4.32237	4.39572	4.22237
Test	M264	100-02-7	InChI=1S/C6H5NO3/c8-6-3-1-5(2-4-6)7(9)10/h1-4,8H	13330	4.01852	3.35288	3.63253
Training	M265	100-21-0	InChI=1S/C8H6O4/c9-7(10)5-1-2-6(4-3-5)8(11)12/h1-4H,(H,9,10)(H,11,12)	491001	2.52937	2.98268	2.62937
Training	M266	100-25-4	InChI=1S/C6H4N2O4/c9-7(10)5-1-2-6(4-3-5)8(11)12/h1-4H	1300	5.11164	4.03742	4.82091
Training	M267	100-37-8	InChI=1S/C6H15NO/c1-3-7(4-2)5-6-8/h8H,3-6H2,1-2H3	164999	2.8514	2.90696	2.7514
Training	M268	100-41-4	InChI=1S/C8H10/c1-2-8-6-4-3-5-7-8/h3-7H,2H2,1H3	2100	4.70376	4.56808	4.51505
Training	M269	100-42-5	InChI=1S/C8H8/c1-2-8-6-4-3-5-7-8/h2-7H,1H2	4700	4.34556	4.64075	4.24556
Training	M270	100-44-7	InChI=1S/C7H7Cl/c8-6-7-4-2-1-3-5-7/h1-5H,6H2	2250	4.75019	4.37662	4.36698
Training	M271	100-52-7	InChI=1S/C7H6O/c8-6-7-4-2-1-3-5-7/h1-6H	24333.4	3.6396	3.86005	3.7396
Training	M272	100-61-8	InChI=1S/C7H9N/c1-8-7-5-3-2-4-6-7/h2-6,8H,1H3	175	5.78697	4.03101	4.79019
Training	M273	100-66-3	InChI=1S/C7H8O/c1-8-7-5-3-2-4-6-7/h2-6H,1H3	11062.7	3.99012	4.02953	4.09012
Training	M274	100-68-5	InChI=1S/C7H8S/c1-8-7-5-3-2-4-6-7/h2-6H,1H3	2906.28	4.63079	4.50517	4.50968
Training	M275	100-83-4	InChI=1S/C7H6O2/c8-5-6-2-1-3-7(9)4-6/h1-5,9H	30958.9	3.596	3.13513	3.45598
Training	M276	101-05-3	InChI=1S/C9H5Cl3N4/c10-5-3-1-2-4-6(5)13-9-15-7(11)14-8(12)16-9/h1-4H,(H,13,14,15,16)	560	5.69197	5.45847	5.41468
Training	M277	101-20-2	InChI=1S/C13H9Cl3N2O/c14-8-1-3-9(4-2-8)17-13(19)18-10-5-6-11(15)12(16)7-10/h1-7H,(H2,17,18,19)	10.75	7.4677	5.99835	6.51559
Training	M278	101-21-3	InChI=1S/C10H12ClNO2/c1-7(2)14-10(13)12-9-5-3-4-8(11)6-9/h3-7H,1-2H3,(H,12,13)	2600	4.91475	4.50032	4.59859
Training	M279	101-27-9	InChI=1S/C11H9Cl2NO2/c12-6-1-2-7-16-11(15)14-10-5-3-4-9(13)8-10/h3-5,8H,6-7H2,(H,14,15)	300	5.93467	4.79497	5.16588
Test	M280	101-42-8	InChI=1S/C9H12N2O/c1-11(2)9(12)10-8-6-4-3-5-7-8/h3-7H,1-2H3,(H,10,12)	999.998	5.21538	3.89594	3.54879
Test	M281	101-55-3	InChI=1S/C12H9BrO/c13-10-6-8-12(9-7-10)14-11-4-2-1-3-5-11/h1-9H	240	6.01617	5.67094	5.82068
Training	M282	101-72-4	InChI=1S/C15H18N2/c1-12(2)16-14-8-10-15(11-9-14)17-13-6-4-3-5-7-13/h3-12,16-17H,1-2H3	1100	5.31332	5.86428	5.41332
Training	M283	101-77-9	InChI=1S/C13H14N2/c14-12-5-1-10(2-6-12)9-11-3-7-13(15)8-4-11/h1-8H,9,14-15H2	2300	4.93552	4.0468	4.51461
Training	M284	101-84-8	InChI=1S/C12H10O/c1-3-7-11(8-4-1)13-12-9-5-2-6-10-12/h1-10H	669.999	5.4049	5.0156	5.3049
Training	M285	102-06-7	InChI=1S/C13H13N3/c14-13(15-11-7-3-1-4-8-11)16-12-9-5-2-6-10-12/h1-10H,(H3,14,15,16)	17000	4.09437	5.45177	4.64839
Training	M286	102-08-9	InChI=1S/C13H12N2S/c16-13(14-11-7-3-1-4-8-11)15-12-9-5-2-6-10-12/h1-10H,(H2,14,15,16)	67000	3.53246	5.7618	4.71163
Training	M287	102-76-1	InChI=1S/C9H14O6/c1-6(10)13-4-9(15-8(3)12)5-14-7(2)11/h9H,4-5H2,1-3H3	380000	2.75908	3.33048	2.85908
Training	M288	103-11-7	InChI=1S/C11H20O2/c1-4-7-8-10(5-2)9-13-11(12)6-3/h6,10H,3-5,7-9H2,1-2H3/t10-/m0/s1	1300	5.15152	4.85155	5.05152
Training	M289	103-23-1	InChI=1S/C22H42O4/c1-5-9-13-19(7-3)17-25-21(23)15-11-12-16-22(24)26-18-20(8-4)14-10-6-2/h19-20H,5-18H2,1-4H3/t19-,20+	659.999	5.74932	6.56783	5.84932
Training	M290	103-33-3	InChI=1S/C12H10N2/c1-3-7-11(8-4-1)13-14-12-9-5-2-6-10-12/h1-10H/b14-13-	4999.99	4.56163	5.18198	4.66163
Training	M291	103-65-1	InChI=1S/C9H12/c1-2-6-9-7-4-3-5-8-9/h3-5,7-8H,2,6H2,1H3	2187.65	4.7399	4.74572	4.6399
Training	M292	103-69-5	InChI=1S/C8H11N/c1-2-9-8-6-4-3-5-7-8/h3-7,9H,2H2,1H3	420.001	5.46018	4.32057	5.17524
Test	M293	103-72-0	InChI=1S/C7H5NS/c9-6-8-7-4-2-1-3-5-7/h1-5H	100	6.13093	4.7826	4.82864
Training	M294	103-84-4	InChI=1S/C8H9NO/c1-7(10)9-8-5-3-2-4-6-8/h2-6H,1H3,(H,9,10)	99999.9	3.13086	3.91273	3.67586
Training	M295	103-85-5	InChI=1S/C7H8N2S/c8-7(10)9-6-4-2-1-3-5-6/h1-5H,(H3,8,9,10)	59000	3.41161	4.46348	3.51161
Training	M296	103-90-2	InChI=1S/C8H9NO2/c1-6(10)9-7-2-4-8(11)5-3-7/h2-5,11H,1H3,(H,9,10)	22060.7	3.83583	3.28519	3.93583
Training	M297	104-51-8	InChI=1S/C10H14/c1-2-3-7-10-8-5-4-6-9-10/h4-6,8-9H,2-3,7H2,1H3	411.559	5.51338	4.96391	5.34551
Training	M298	104-90-5	InChI=1S/C8H11N/c1-3-8-5-4-7(2)9-6-8/h4-6H,3H2,1-2H3	39600.1	3.48573	3.66877	3.90295
Training	M299	104-94-9	InChI=1S/C7H9NO/c1-9-7-4-2-6(8)3-5-7/h2-5H,8H2,1H3	329.999	5.57193	3.54493	4.14431
Training	M300	105-05-5	InChI=1S/C10H14/c1-3-9-5-7-10(4-2)8-6-9/h5-8H,3-4H2,1-2H3	32000	3.62266	4.99866	4.0323
Training	M301	105-37-3	InChI=1S/C5H10O2/c1-3-5(6)7-4-2/h3-4H2,1-2H3	120000	2.92998	3.50042	3.02669
Training	M302	105-39-5	InChI=1S/C4H7ClO2/c1-2-7-4(6)3-5/h2-3H2,1H3	1600	4.88419	3.6795	4.17266
Training	M303	105-55-5	InChI=1S/C5H12N2S/c1-3-6-5(8)7-4-2/h3-4H2,1-2H3,(H2,6,7,8)	193000	2.83576	4.17555	2.93576
Training	M304	105-60-2	InChI=1S/C6H11NO/c8-6-4-2-1-3-5-7-6/h1-5H2,(H,7,8)	500002	2.35471	3.06725	2.49041
Test	M305	105-67-9	InChI=1S/C8H10O/c1-6-3-4-8(9)7(2)5-6/h3-5,9H,1-2H3	4799.98	4.4057	3.75351	4.03308
Training	M306	105-76-0	InChI=1S/C12H20O4/c1-3-5-9-15-11(13)7-8-12(14)16-10-6-4-2/h7-8H,3-6,9-10H2,1-2H3/b8-7-	21000	4.03626	4.39921	4.13626
Training	M307	105-99-7	InChI=1S/C14H26O4/c1-3-5-11-17-13(15)9-7-8-10-14(16)18-12-6-4-2/h3-12H2,1-2H3	9300.01	4.44373	4.65389	4.54373
Test	M308	106-37-6	InChI=1S/C6H4Br2/c7-5-1-2-6(8)4-3-5/h1-4H	1029.78	5.35999	5.45851	4.51033
Training	M309	106-38-7	InChI=1S/C7H7Br/c1-6-2-4-7(8)5-3-6/h2-5H,1H3	4700	4.56098	4.91443	4.46098
Training	M310	106-41-2	InChI=1S/C6H5BrO/c7-5-1-3-6(8)4-2-5/h1-4,8H	5950	4.46355	4.22033	4.56355
Training	M311	106-42-3	InChI=1S/C8H10/c1-7-3-5-8(2)6-4-7/h3-6H,1-2H3	28000	3.57882	4.56391	3.67882
Training	M312	106-43-4	InChI=1S/C7H7Cl/c1-6-2-4-7(8)5-3-6/h2-5H,1H3	3569.84	4.54973	4.54593	4.44973
Training	M313	106-44-5	InChI=1S/C7H8O/c1-6-2-4-7(8)5-3-6/h2-5,8H,1H3	1400	4.88785	3.60201	4.2612
Test	M314	106-46-7	InChI=1S/C6H4Cl2/c7-5-1-2-6(8)4-3-5/h1-4H	2200	4.8249	4.70036	4.81546
Training	M315	106-47-8	InChI=1S/C6H6ClN/c7-5-1-3-6(8)4-2-5/h1-4H,8H2	180	5.85048	4.16195	5.38084
Test	M316	106-48-9	InChI=1S/C6H5ClO/c7-5-1-3-6(8)4-2-5/h1-4,8H	4100	4.49631	3.81608	4.36294
Training	M317	106-63-8	InChI=1S/C7H12O2/c1-4-7(8)9-5-6(2)3/h4,6H,1,5H2,2-3H3	9700	4.12101	4.00982	4.02101
Training	M318	106-88-7	InChI=1S/C4H8O/c1-2-4-3-5-4/h4H,2-3H2,1H3/t4-/m0/s1	69800	3.01411	3.15047	2.91411
Test	M319	106-89-8	InChI=1S/C3H5ClO/c4-1-3-2-5-3/h3H,1-2H2/t3-/m1/s1	24100.1	3.58424	3.48602	4.04046
Training	M320	106-91-2	InChI=1S/C7H10O3/c1-5(2)7(8)10-4-6-3-9-6/h6H,1,3-4H2,2H3/t6-/m1/s1	24899.9	3.75656	3.51843	3.65656
Training	M321	106-93-4	InChI=1S/C2H4Br2/c3-1-2-4/h1-2H2	119000	3.19829	5.53011	3.45266
Training	M322	106-99-0	InChI=1S/C4H6/c1-3-4-2/h3-4H,1-2H2	500	5.03415	3.9453	3.96649
Training	M323	107-01-7	InChI=1S/C4H8/c1-3-4-2/h3-4H,1-2H3/b4-3-	63000	2.94967	4.07699	3.16594
Training	M324	107-02-8	InChI=1S/C3H4O/c1-2-3-4/h2-3H,1H2	16708	3.52575	3.19208	3.42575
Training	M325	107-03-9	InChI=1S/C3H8S/c1-2-3-4/h4H,2-3H2,1H3	59.9997	6.10358	4.12919	4.57528
Test	M326	107-06-2	InChI=1S/C2H4Cl2/c3-1-2-4/h1-2H2	130400	2.88018	4.27154	3.49471
Training	M327	107-07-3	InChI=1S/C2H5ClO/c3-1-2-4/h4H,1-2H2	195375	2.615	2.77562	2.715
Training	M328	107-11-9	InChI=1S/C3H7N/c1-2-3-4/h2H,1,3-4H2	40166.7	3.15273	2.91471	3.05273
Training	M329	107-13-1	InChI=1S/C3H3N/c1-2-3-4/h2H,1H2	8800	3.78031	3.21534	3.68031
Training	M330	107-15-3	InChI=1S/C2H8N2/c3-1-2-4/h1-4H2	26500	3.35562	2.03254	3.25562
Training	M331	107-21-1	InChI=1S/C2H6O2/c3-1-2-4/h3-4H,1-2H2	3.444e+07	0.255803	1.63432	0.956619
Training	M332	107-22-2	InChI=1S/C2H2O2/c3-1-2-4/h1-2H	404000	2.15732	2.88511	2.25732
Training	M333	107-41-5	InChI=1S/C6H14O2/c1-5(7)4-6(2,3)8/h5,7-8H,4H2,1-3H3/t5-/m1/s1	1.95289e+07	0.781844	2.8093	1.99767
Training	M334	107-66-4	InChI=1S/C8H19O4P/c1-3-5-7-11-13(9,10)12-8-6-4-2/h3-8H2,1-2H3,(H,9,10)	64000.1	3.51647	4.20028	3.61647
Test	M335	107-83-5	InChI=1S/C6H14/c1-4-5-6(2)3/h6H,4-5H2,1-3H3	1557	4.74309	4.57596	4.47731
Training	M336	107-86-8	InChI=1S/C5H8O/c1-5(2)3-4-6/h3-4H,1-2H3	13500	3.79455	3.76307	3.69455
Training	M337	107-92-6	InChI=1S/C4H8O2/c1-2-3-4(5)6/h2-3H2,1H3,(H,5,6)	61000	3.15967	2.82515	3.05967
Training	M338	107-98-2	InChI=1S/C4H10O2/c1-4(5)3-6-2/h4-5H,3H2,1-2H3/t4-/m1/s1	500000	2.25586	2.2748	2.15586
Test	M339	108-10-1	InChI=1S/C6H12O/c1-5(2)4-6(3)7/h5H,4H2,1-3H3	170000	2.77024	3.83153	3.57943
Training	M340	108-18-9	InChI=1S/C6H15N/c1-5(2)7-6(3)4/h5-7H,1-4H3	448000	2.35386	3.74721	2.98191
Test	M341	108-37-2	InChI=1S/C6H4BrCl/c7-5-2-1-3-6(8)4-5/h1-4H	1667.55	5.05998	5.0948	4.61251
Training	M342	108-38-3	InChI=1S/C8H10/c1-7-4-3-5-8(2)6-7/h3-6H,1-2H3	23600	3.65307	4.56391	3.67882
Test	M343	108-39-4	InChI=1S/C7H8O/c1-6-3-2-4-7(8)5-6/h2-5,8H,1H3	18800	3.75982	3.59903	4.26102
Training	M344	108-42-9	InChI=1S/C6H6ClN/c7-5-2-1-3-6(8)4-5/h1-4H,8H2	100	6.10576	4.16814	5.37828
Training	M345	108-44-1	InChI=1S/C7H9N/c1-6-3-2-4-7(8)5-6/h2-5H,8H2,1H3	729.999	5.16668	3.94934	4.57285
Test	M346	108-62-3	InChI=1S/C8H16O4/c1-5-9-6(2)11-8(4)12-7(3)10-5/h5-8H,1-4H3/t5-,6-,7-,8+	89999.9	3.29179	4.55909	3.23089
Test	M347	108-65-6	InChI=1S/C6H12O3/c1-5(4-8-3)9-6(2)7/h5H,4H2,1-3H3/t5-/m0/s1	373001	2.54938	3.2291	3.02116
Training	M348	108-70-3	InChI=1S/C6H3Cl3/c7-4-1-5(8)3-6(9)2-4/h1-3H	1511.48	5.07935	5.06939	4.9926
Training	M349	108-78-1	InChI=1S/C3H6N6/c4-1-7-2(5)9-3(6)8-1/h(H6,4,5,6,7,8,9)	2e+06	1.79975	1.94792	1.89975
Training	M350	108-83-8	InChI=1S/C9H18O/c1-7(2)5-9(10)6-8(3)4/h7-8H,5-6H2,1-4H3	250001	2.75508	4.72783	4.32395
Training	M351	108-85-0	InChI=1S/C6H11Br/c7-6-4-2-1-3-5-6/h6H,1-5H2	21000	3.89012	4.55807	3.99012
Test	M352	108-86-1	InChI=1S/C6H5Br/c7-6-4-2-1-3-5-6/h1-5H	5793.67	4.43297	4.75215	4.25618
Test	M353	108-88-3	InChI=1S/C7H8/c1-7-5-3-2-4-6-7/h2-6H,1H3	19600	3.67218	4.35079	3.7109
Training	M354	108-90-7	InChI=1S/C6H5Cl/c7-6-4-2-1-3-5-6/h1-5H	8600	4.11687	4.33197	4.21687
Training	M355	108-94-1	InChI=1S/C6H10O/c7-6-4-2-1-3-5-6/h1-5H2	800000	2.08877	3.33144	2.69055
Test	M356	108-95-2	InChI=1S/C6H6O/c7-6-4-2-1-3-5-6/h1-5,7H	7340.61	4.10791	3.39277	3.72698
Test	M357	109-46-6	InChI=1S/C9H20N2S/c1-3-5-7-10-9(12)11-8-6-4-2/h3-8H2,1-2H3,(H2,10,11,12)	10699.9	4.24554	4.72957	4.27944
Test	M358	109-52-4	InChI=1S/C5H10O2/c1-2-3-4-5(6)7/h2-4H2,1H3,(H,6,7)	45000.1	3.35595	3.04821	3.01623
Training	M359	109-55-7	InChI=1S/C5H14N2/c1-7(2)5-3-4-6/h3-6H2,1-2H3	59499.9	3.23484	2.92146	3.13484
Training	M360	109-60-4	InChI=1S/C5H10O2/c1-3-4-7-5(2)6/h3-4H2,1-2H3	250001	2.61122	3.39581	2.71122
Training	M361	109-66-0	InChI=1S/C5H12/c1-3-5-4-2/h3-5H2,1-2H3	6220.12	4.06443	4.05745	4.03324
Training	M362	109-69-3	InChI=1S/C4H9Cl/c1-2-3-4-5/h2-4H2,1H3	190001	2.6877	4.10387	3.14282
Training	M363	109-89-7	InChI=1S/C4H11N/c1-3-5-4-2/h5H,3-4H2,1-2H3	56000	3.11595	3.33684	3.16332
Training	M364	110-02-1	InChI=1S/C4H4S/c1-2-4-5-3-1/h1-4H	317998	2.42258	4.25462	3.48639
Test	M365	110-15-6	InChI=1S/C4H6O4/c5-3(6)1-2-4(7)8/h1-2H2,(H,5,6)(H,7,8)	374200	2.4991	2.29822	2.5274
Training	M366	110-16-7	InChI=1S/C4H4O4/c5-3(6)1-2-4(7)8/h1-2H,(H,5,6)(H,7,8)/b2-1-	87999.8	3.12025	2.37651	2.95811
Training	M367	110-17-8	InChI=1S/C4H4O4/c5-3(6)1-2-4(7)8/h1-2H,(H,5,6)(H,7,8)/b2-1+	212000	2.73839	2.31045	2.78567
Training	M368	110-54-3	InChI=1S/C6H14/c1-3-5-6-4-2/h3-6H2,1-2H3	3849.52	4.34998	4.28307	4.44998
Training	M369	110-65-6	InChI=1S/C4H6O2/c5-3-1-2-4-6/h5-6H,3-4H2	26800	3.50681	1.9813	2.76204
Training	M370	110-80-5	InChI=1S/C4H10O2/c1-2-6-4-3-5/h5H,2-4H2,1H3	7.67e+06	1.07003	2.32709	2.02145
Training	M371	110-83-8	InChI=1S/C6H10/c1-2-4-6-5-3-1/h1-2H,3-6H2	9400	3.94145	4.22172	3.84145
Training	M372	110-85-0	InChI=1S/C4H10N2/c1-2-6-4-3-5-1/h5-6H,1-4H2	21000	3.61296	2.56196	3.51296
Training	M373	110-86-1	InChI=1S/C5H5N/c1-2-4-6-5-3-1/h1-5H	944000	1.9232	3.11079	2.21832
Training	M374	110-93-0	InChI=1S/C8H14O/c1-7(2)5-4-6-8(3)9/h5H,4,6H2,1-3H3	82999.9	3.18197	4.43651	3.61572
Test	M375	110-96-3	InChI=1S/C8H19N/c1-7(2)5-9-6-8(3)4/h7-9H,5-6H2,1-4H3	34999.9	3.56734	4.23664	4.26353
Training	M376	111-27-3	InChI=1S/C6H14O/c1-2-3-4-5-6-7/h7H,2-6H2,1H3	40974.3	3.39683	3.07369	3.29683
Training	M377	111-30-8	InChI=1S/C5H8O2/c6-4-2-1-3-5-7/h4-5H,1-3H2	22500	3.64832	3.26638	3.54832
Training	M378	111-40-0	InChI=1S/C4H13N3/c5-1-3-7-4-2-6/h7H,1-6H2	16000	3.80942	2.0523	3.70942
Training	M379	111-42-2	InChI=1S/C4H11NO2/c6-3-1-5-2-4-7/h5-7H,1-4H2	102948	3.00913	1.62151	2.42818
Test	M380	111-44-4	InChI=1S/C4H8Cl2O/c5-1-3-7-4-2-6/h1-4H2	240000	2.77516	4.15985	3.90146
Training	M381	111-65-9	InChI=1S/C8H18/c1-3-5-7-8-6-4-2/h3-8H2,1-2H3	378.103	5.48017	4.73121	5.38017
Test	M382	111-70-6	InChI=1S/C7H16O/c1-2-3-4-5-6-7-8/h8H,2-7H2,1H3	62999.8	3.26587	3.29621	3.48985
Training	M383	111-76-2	InChI=1S/C6H14O2/c1-2-3-5-8-6-4-7/h7H,2-6H2,1H3	1.815e+06	1.81365	2.65847	1.91365
Training	M384	111-87-5	InChI=1S/C8H18O/c1-2-3-4-5-6-7-8-9/h9H,2-8H2,1H3	23441.4	3.74472	3.51839	3.64472
Training	M385	111-90-0	InChI=1S/C6H14O3/c1-2-8-5-6-9-4-3-7/h7H,2-6H2,1H3	1.98201e+06	1.83056	2.36455	1.93056
Training	M386	111-91-1	InChI=1S/C5H10Cl2O2/c6-1-3-8-5-9-4-2-7/h1-5H2	201000	2.93495	4.17248	3.61671
Training	M387	111-92-2	InChI=1S/C8H19N/c1-3-5-7-9-8-6-4-2/h9H,3-8H2,1-2H3	4199.99	4.48816	4.00426	4.38816
Test	M388	112-12-9	InChI=1S/C11H22O/c1-3-4-5-6-7-8-9-10-11(2)12/h3-10H2,1-2H3	230	5.86947	4.76653	4.41285
Training	M389	112-18-5	InChI=1S/C14H31N/c1-4-5-6-7-8-9-10-11-12-13-14-15(2)3/h4-14H2,1-3H3	83.0002	6.41012	5.52874	6.2818
Training	M390	112-24-3	InChI=1S/C6H18N4/c7-1-3-9-5-6-10-4-2-8/h9-10H,1-8H2	32500	3.65316	2.05418	3.71465
Training	M391	112-27-6	InChI=1S/C6H14O4/c7-1-3-9-5-6-10-4-2-8/h7-8H,1-6H2	3.5e+07	0.632524	1.72559	1.51715
Test	M392	112-30-1	InChI=1S/C10H22O/c1-2-3-4-5-6-7-8-9-10-11/h11H,2-10H2,1H3	1800	4.94416	3.96218	3.93375
Training	M393	112-31-2	InChI=1S/C10H20O/c1-2-3-4-5-6-7-8-9-10-11/h10H,2-9H2,1H3	8799.99	4.24938	4.78138	4.34938
Test	M394	112-35-6	InChI=1S/C7H16O4/c1-9-4-5-11-7-6-10-3-2-8/h8H,2-7H2,1H3	1e+07	1.21537	2.10755	1.88583
Training	M395	112-50-5	InChI=1S/C8H18O4/c1-2-10-5-6-12-8-7-11-4-3-9/h9H,2-8H2,1H3	9.99999e+06	1.25097	2.40267	1.69454
Training	M396	112-57-2	InChI=1S/C8H23N5/c9-1-3-11-5-7-13-8-6-12-4-2-10/h11-13H,1-10H2	14600	4.1128	2.05049	4.0128
Training	M397	113-48-4	InChI=1S/C17H25NO2/c1-3-5-6-11(4-2)10-18-16(19)14-12-7-8-13(9-12)15(14)17(18)20/h7-8,11-15H,3-6,9-10H2,1-2H3/t11-,12-,13+,14-,15+/m0/s1	2300	5.07821	4.59507	4.97821
Training	M398	114-07-8	InChI=1S/C37H67NO13/c1-14-25-37(10,45)30(41)20(4)27(39)18(2)16-35(8,44)32(51-34-28(40)24(38(11)12)15-19(3)47-34)21(5)29(22(6)33(43)49-25)50-26-17-36(9,46-13)31(42)23(7)48-26/h18-26,28-32,34,40-42,44-45H,14-17H2,1-13H3/t18-,19+,20-,21+,22+,23+,24-,25+,26+,28+,29+,30+,31-,32+,34+,35-,36-,37-/m1/s1	30500	4.38135	4.99897	4.28135
Test	M399	114-26-1	InChI=1S/C11H15NO3/c1-8(2)14-9-6-4-5-7-10(9)15-11(13)12-3/h4-8H,1-3H3,(H,12,13)	150	6.14456	4.2564	5.0754
Training	M400	115-18-4	InChI=1S/C5H10O/c1-4-5(2,3)6/h4,6H,1H2,2-3H3	500000	2.2362	3.04091	2.63475
Test	M401	115-20-8	InChI=1S/C2H3Cl3O/c3-2(4,5)1-6/h6H,1H2	148000	3.0041	3.7908	3.33397
Training	M402	115-29-7	InChI=1S/C9H6Cl6O3S/c10-5-6(11)8(13)4-2-18-19(16)17-1-3(4)7(5,12)9(8,14)15/h3-4H,1-2H2/t3-,4+,7-,8+,19+	440	5.96606	5.66826	5.76262
Training	M403	115-31-1	InChI=1S/C13H19NO2S/c1-12(2)9-4-5-13(12,3)10(6-9)16-11(15)7-17-8-14/h9-10H,4-7H2,1-3H3/t9-,10-,13+/m0/s1	90	6.4495	5.56362	5.786
Training	M404	115-32-2	InChI=1S/C14H9Cl5O/c15-11-5-1-9(2-6-11)13(20,14(17,18)19)10-3-7-12(16)8-4-10/h1-8,20H	140	6.42264	5.88156	6.32264
Test	M405	115-77-5	InChI=1S/C5H12O4/c6-1-5(2-7,3-8)4-9/h6-9H,1-4H2	999997	2.13401	1.06986	2.07561
Training	M406	115-86-6	InChI=1S/C18H15O4P/c19-23(20-16-10-4-1-5-11-16,21-17-12-6-2-7-13-17)22-18-14-8-3-9-15-18/h1-15H	1000	5.51359	7.0867	5.65724
Test	M407	115-95-7	InChI=1S/C12H20O2/c1-6-12(5,14-11(4)13)9-7-8-10(2)3/h6,8H,1,7,9H2,2-5H3/t12-/m0/s1	6200	4.5005	5.40651	5.04257
Test	M408	116-06-3	InChI=1S/C7H14N2O2S/c1-7(2,12-4)5-9-11-6(10)8-3/h5H,1-4H3,(H,8,10)/b9-5+	420	5.65611	4.37849	3.95692
Training	M409	116-29-0	InChI=1S/C12H6Cl4O2S/c13-7-1-3-8(4-2-7)19(17,18)12-6-10(15)9(14)5-11(12)16/h1-6H	2000	5.25048	6.12801	5.57243
Training	M410	117-10-2	InChI=1S/C14H8O4/c15-9-5-1-3-7-11(9)14(18)12-8(13(7)17)4-2-6-10(12)16/h1-6,15-16H	3335.49	4.85743	3.24137	4.75901
Training	M411	117-18-0	InChI=1S/C6HCl4NO2/c7-2-1-3(8)5(10)6(4(2)9)11(12)13/h1H	390	5.82539	5.46886	5.72539
Training	M412	118-69-4	InChI=1S/C7H6Cl2/c1-5-6(8)3-2-4-7(5)9/h2-4H,1H3	1800	4.95163	4.87632	5.05163
Training	M413	118-74-1	InChI=1S/C6Cl6/c7-1-2(8)4(10)6(12)5(11)3(1)9	5.6956	7.69897	5.91093	7.55865
Training	M414	118-79-6	InChI=1S/C6H3Br3O/c7-3-1-4(8)6(10)5(9)2-3/h1-2,10H	2200	5.17714	5.51105	5.07714
Training	M415	118-96-7	InChI=1S/C7H5N3O6/c1-4-6(9(13)14)2-5(8(11)12)3-7(4)10(15)16/h2-3H,1H3	6600	4.53673	4.36702	4.73662
Training	M416	119-32-4	InChI=1S/C7H8N2O2/c1-5-2-3-6(8)4-7(5)9(10)11/h2-4H,8H2,1H3	14200	4.02999	3.67592	3.92999
Training	M417	119-61-9	InChI=1S/C13H10O/c14-13(11-7-3-1-4-8-11)12-9-5-2-6-10-12/h1-10H	7653.24	4.37675	4.88649	4.29201
Training	M418	119-64-2	InChI=1S/C10H12/c1-2-6-10-8-4-3-7-9(10)5-1/h1-2,5-6H,3-4,7-8H2	2351.06	4.74997	4.60575	4.64997
Training	M419	119-65-3	InChI=1S/C9H7N/c1-2-4-9-7-10-6-5-8(9)3-1/h1-7H	25100.1	3.71145	3.87244	4.04431
Training	M420	120-12-7	InChI=1S/C14H10/c1-2-6-12-10-14-8-4-3-7-13(14)9-11(12)5-1/h1-10H	490.864	5.56002	5.757	5.46002
Test	M421	120-14-9	InChI=1S/C9H10O3/c1-11-8-4-3-7(6-10)5-9(8)12-2/h3-6H,1-2H3	117376	3.15098	3.71771	3.48898
Training	M422	120-25-2	InChI=1S/C10H12O3/c1-3-13-9-5-4-8(7-11)6-10(9)12-2/h4-7H,3H2,1-2H3	115021	3.19498	4.00758	3.79265
Training	M423	120-61-6	InChI=1S/C10H10O4/c1-13-9(11)7-3-5-8(6-4-7)10(12)14-2/h3-6H,1-2H3	30400	3.80534	3.79757	3.70534
Training	M424	120-72-9	InChI=1S/C8H7N/c1-2-4-8-7(3-1)5-6-9-8/h1-6,9H	1005.76	5.06624	3.99075	4.75007
Training	M425	120-80-9	InChI=1S/C6H6O2/c7-5-3-1-2-4-6(5)8/h1-4,7-8H	1700.01	4.81138	3.23272	4.0816
Test	M426	120-82-1	InChI=1S/C6H3Cl3/c7-4-1-2-5(8)6(9)3-4/h1-3H	1680	5.03344	5.10035	5.03681
Training	M427	120-83-2	InChI=1S/C6H4Cl2O/c7-4-1-2-6(9)5(8)3-4/h1-3,9H	2261.58	4.85778	4.19625	4.79938
Training	M428	120-93-4	InChI=1S/C3H6N2O/c6-3-4-1-2-5-3/h1-2H2,(H2,4,5,6)	985000	1.94153	2.36412	2.44327
Training	M429	121-14-2	InChI=1S/C7H6N2O4/c1-5-2-3-6(8(10)11)4-7(5)9(12)13/h2-4H,1H3	35000.1	3.71632	4.23885	4.63248
Training	M430	121-20-0	InChI=1S/C21H28O5/c1-7-8-9-14-13(3)17(11-16(14)22)26-20(24)18-15(21(18,4)5)10-12(2)19(23)25-6/h7-8,10,15,17-18H,9,11H2,1-6H3/b8-7+,12-10?/t15-,17-,18-/m0/s1	12	7.47766	5.84605	6.89176
Training	M431	121-29-9	InChI=1S/C22H28O5/c1-7-8-9-10-15-14(3)18(12-17(15)23)27-21(25)19-16(22(19,4)5)11-13(2)20(24)26-6/h7-9,11,16,18-19H,1,10,12H2,2-6H3/b9-8+,13-11-/t16-,18+,19-/m0/s1	15	7.39498	6.062	7.29498
Training	M432	121-32-4	InChI=1S/C9H10O3/c1-2-12-9-5-7(6-10)3-4-8(9)11/h3-6,11H,2H2,1H3	41455.2	3.60298	3.33105	3.70298
Training	M433	121-33-5	InChI=1S/C8H8O3/c1-11-8-4-6(5-9)2-3-7(8)10/h2-5,10H,1H3	48224.9	3.49899	3.04733	3.59899
Training	M434	121-69-7	InChI=1S/C8H11N/c1-9(2)8-6-4-3-5-7-8/h3-7H,1-2H3	13700	3.94671	4.24924	4.04671
Training	M435	121-73-3	InChI=1S/C6H4ClNO2/c7-5-2-1-3-6(4-5)8(9)10/h1-4H	19830	3.90011	4.40191	4.16688
Training	M436	121-75-5	InChI=1S/C10H19O6PS2/c1-5-15-9(11)7-8(10(12)16-6-2)19-17(18,13-3)14-4/h8H,5-7H2,1-4H3/t8-/m1/s1	16.1533	7.31072	6.15095	7.21072
Test	M437	121-86-8	InChI=1S/C7H6ClNO2/c1-5-2-3-6(9(10)11)4-7(5)8/h2-4H,1H3	4000.08	4.6324	4.55868	4.39285
Training	M438	121-87-9	InChI=1S/C6H5ClN2O2/c7-5-3-4(9(10)11)1-2-6(5)8/h1-3H,8H2	5600	4.48877	4.00562	4.55169
Training	M439	121-91-5	InChI=1S/C8H6O4/c9-7(10)5-2-1-3-6(4-5)8(11)12/h1-4H,(H,9,10)(H,11,12)	876001	2.27795	3.04452	2.58115
Test	M440	122-11-2	InChI=1S/C12H14N4O4S/c1-19-11-7-10(14-12(15-11)20-2)16-21(17,18)9-5-3-8(13)4-6-9/h3-7H,13H2,1-2H3,(H,14,15,16)	248000	3.09737	4.00357	3.06899
Training	M441	122-14-5	InChI=1S/C9H12NO5PS/c1-7-6-8(4-5-9(7)10(11)12)15-16(17,13-2)14-3/h4-6H,1-3H3	8.6	7.50835	6.50338	7.60835
Training	M442	122-34-9	InChI=1S/C7H12ClN5/c1-3-9-6-11-5(8)12-7(13-6)10-4-2/h3-4H2,1-2H3,(H2,9,10,11,12,13)	32033.3	3.79901	4.10601	3.69901
Training	M443	122-39-4	InChI=1S/C12H11N/c1-3-7-11(8-4-1)13-12-9-5-2-6-10-12/h1-10,13H	1200	5.14928	5.23367	5.04928
Test	M444	122-42-9	InChI=1S/C10H13NO2/c1-8(2)13-10(12)11-9-6-4-3-5-7-9/h3-8H,1-2H3,(H,11,12)	23000	3.89165	4.31855	4.72022
Test	M445	122-52-1	InChI=1S/C6H15O3P/c1-4-7-10(8-5-2)9-6-3/h4-6H2,1-3H3	94099.8	3.24692	4.72296	5.34454
Test	M446	122-66-7	InChI=1S/C12H12N2/c1-3-7-11(8-4-1)13-14-12-9-5-2-6-10-12/h1-10,13-14H	4100	4.65259	5.35994	4.85093
Training	M447	122-88-3	InChI=1S/C8H7ClO3/c9-6-1-3-7(4-2-6)12-5-8(10)11/h1-4H,5H2,(H,10,11)	40000	3.66883	3.78253	3.56883
Training	M448	122-99-6	InChI=1S/C8H10O2/c9-6-7-10-8-4-2-1-3-5-8/h1-5,9H,6-7H2	488001	2.45197	3.23381	2.86658
Training	M449	123-01-3	InChI=1S/C18H30/c1-2-3-4-5-6-7-8-9-10-12-15-18-16-13-11-14-17-18/h11,13-14,16-17H,2-10,12,15H2,1H3	9.00001	7.43745	6.72001	6.58164
Training	M450	123-07-9	InChI=1S/C8H10O/c1-2-7-3-5-8(9)6-4-7/h3-6,9H,2H2,1H3	5699.98	4.33107	3.81582	4.23107
Training	M451	123-08-0	InChI=1S/C7H6O2/c8-5-6-1-3-7(9)4-2-6/h1-5,9H	39791.1	3.487	3.13771	3.387
Training	M452	123-30-8	InChI=1S/C6H7NO/c7-5-1-3-6(8)4-2-5/h1-4,8H,7H2	240	5.65772	2.90102	4.20657
Training	M453	123-42-2	InChI=1S/C6H12O2/c1-5(7)4-6(2,3)8/h8H,4H2,1-3H3	999997	2.06505	2.85414	2.69136
Training	M454	123-54-6	InChI=1S/C5H8O2/c1-4(6)3-5(2)7/h3H2,1-2H3	47600.1	3.3229	3.21527	3.27784
Training	M455	123-86-4	InChI=1S/C6H12O2/c1-3-4-5-8-6(2)7/h3-5H2,1-2H3	7799.98	4.17296	3.62316	3.83483
Training	M456	124-04-9	InChI=1S/C6H10O4/c7-5(8)3-1-2-4-6(9)10/h1-4H2,(H,7,8)(H,9,10)	85599.9	3.2323	2.62106	3.1323
Training	M457	124-40-3	InChI=1S/C2H7N/c1-3-2/h3H,1-2H3	49000	2.96382	2.71293	2.86382
Training	M458	126-22-7	InChI=1S/C8H14Cl3O5P/c1-4-5-6(12)16-7(8(9,10)11)17(13,14-2)15-3/h7H,4-5H2,1-3H3/t7-/m1/s1	6	7.7371	6.15578	7.6371
Training	M459	126-30-7	InChI=1S/C5H12O2/c1-5(2,3-6)4-7/h6-7H,3-4H2,1-2H3	1e+06	2.01765	2.47987	2.11765
Test	M460	126-73-8	InChI=1S/C12H27O4P/c1-4-7-10-14-17(13,15-11-8-5-2)16-12-9-6-3/h4-12H2,1-3H3	2900	4.963	5.55432	5.38803
Training	M461	126-98-7	InChI=1S/C4H5N/c1-4(2)3-5/h1H2,2H3	200000	2.52562	3.52461	2.89952
Training	M462	127-18-4	InChI=1S/C2Cl4/c3-1(4)2(5)6	7490	4.34519	4.62766	4.24519
Training	M463	127-19-5	InChI=1S/C4H9NO/c1-4(6)5(2)3/h1-3H3	500000	2.24115	2.96081	2.51014
Test	M464	128-37-0	InChI=1S/C15H24O/c1-10-8-11(14(2,3)4)13(16)12(9-10)15(5,6)7/h8-9,16H,1-7H3	170	6.11267	5.79506	5.69575
Training	M465	128-39-2	InChI=1S/C14H22O/c1-13(2,3)10-8-7-9-11(12(10)15)14(4,5)6/h7-9,15H,1-6H3	450	5.66134	5.58615	5.76134
Training	M466	129-00-0	InChI=1S/C16H10/c1-3-11-7-9-13-5-2-6-14-10-8-12(4-1)15(11)16(13)14/h1-10H	112.317	6.25544	6.08489	6.15544
Training	M467	131-11-3	InChI=1S/C10H10O4/c1-13-9(11)7-5-3-4-6-8(7)10(12)14-2/h3-6H,1-2H3	33000	3.7697	3.92455	3.73351
Test	M468	132-64-9	InChI=1S/C12H8O/c1-3-7-11-9(5-1)10-6-2-4-8-12(10)13-11/h1-8H	3615.99	4.66758	4.65594	4.53805
Training	M469	132-65-0	InChI=1S/C12H8S/c1-3-7-11-9(5-1)10-6-2-4-8-12(10)13-11/h1-8H	443	5.61902	4.99441	5.51902
Training	M470	132-66-1	InChI=1S/C18H13NO3/c20-17(14-9-3-4-10-15(14)18(21)22)19-16-11-5-7-12-6-1-2-8-13(12)16/h1-11H,(H,19,20)(H,21,22)	118500	3.39062	4.88409	3.49062
Training	M471	133-06-2	InChI=1S/C9H8Cl3NO2S/c10-9(11,12)16-13-7(14)5-3-1-2-4-6(5)8(13)15/h1-2,5-6H,3-4H2/t5-,6-/m1/s1	7100	4.62671	5.34998	4.72671
Training	M472	133-07-3	InChI=1S/C9H4Cl3NO2S/c10-9(11,12)16-13-7(14)5-3-1-2-4-6(5)8(13)15/h1-4H	680	5.6396	5.52911	5.5396
Training	M473	133-90-4	InChI=1S/C7H5Cl2NO2/c8-3-1-4(7(11)12)6(9)5(10)2-3/h1-2H,10H2,(H,11,12)	1e+06	2.31392	3.52579	3.18106
Training	M474	134-62-3	InChI=1S/C12H17NO/c1-4-13(5-2)12(14)11-8-6-7-10(3)9-11/h6-9H,4-5H2,1-3H3	74999.8	3.40658	4.71654	3.50658
Test	M475	135-19-3	InChI=1S/C10H8O/c11-10-6-5-8-3-1-2-4-9(8)7-10/h1-7,11H	3540	4.60987	4.18743	4.11086
Training	M476	137-26-8	InChI=1S/C6H12N2S4/c1-7(2)5(9)11-12-6(10)8(3)4/h1-4H3	240.433	6	6.14907	6.1
Training	M477	138-86-3	InChI=1S/C10H16/c1-8(2)10-6-4-9(3)5-7-10/h4,10H,1,5-7H2,2-3H3/t10-/m1/s1	31	6.64292	5.1726	5.27311
Training	M478	139-13-9	InChI=1S/C6H9NO6/c8-4(9)1-7(2-5(10)11)3-6(12)13/h1-3H2,(H,8,9)(H,10,11)(H,12,13)	351000	2.73604	1.91245	2.63604
Training	M479	139-40-2	InChI=1S/C9H16ClN5/c1-5(2)11-8-13-7(10)14-9(15-8)12-6(3)4/h5-6H,1-4H3,(H2,11,12,13,14,15)	11000	4.31979	4.55349	4.41979
Training	M480	139-85-5	InChI=1S/C7H6O3/c8-4-5-1-2-6(9)7(10)3-5/h1-4,9-10H	29665.9	3.668	3.04494	3.29269
Training	M481	140-38-5	InChI=1S/C7H7ClN2O/c8-5-1-3-6(4-2-5)10-7(9)11/h1-4H,(H3,9,10,11)	116000	3.16751	3.56223	3.26751
Test	M482	140-57-8	InChI=1S/C15H23ClO4S/c1-12(20-21(17)19-10-9-16)11-18-14-7-5-13(6-8-14)15(2,3)4/h5-8,12H,9-11H2,1-4H3/t12-,21-/m0/s1	114.5	6.46606	6.10424	5.62516
Training	M483	140-66-9	InChI=1S/C14H22O/c1-13(2,3)10-14(4,5)11-6-8-12(15)9-7-11/h6-9,15H,10H2,1-5H3	90	6.36031	5.94843	6.19769
Training	M484	140-88-5	InChI=1S/C5H8O2/c1-3-5(6)7-4-2/h3H,1,4H2,2H3	6150.01	4.21163	3.56957	3.88751
Training	M485	141-10-6	InChI=1S/C13H20O/c1-11(2)7-5-8-12(3)9-6-10-13(4)14/h6-7,9-10H,5,8H2,1-4H3/b10-6+,12-9-	3699.99	4.71577	5.66649	4.93408
Test	M486	141-32-2	InChI=1S/C7H12O2/c1-3-5-6-9-7(8)4-2/h4H,2-3,5-6H2,1H3	8200	4.19397	3.89364	3.8512
Training	M487	141-66-2	InChI=1S/C8H16NO5P/c1-7(6-8(10)9(2)3)14-15(11,12-4)13-5/h6H,1-5H3/b7-6+	13	7.26115	4.36949	6.77291
Test	M488	141-78-6	InChI=1S/C4H8O2/c1-3-6-4(2)5/h3H2,1-2H3	560000	2.19681	3.28969	3.09282
Training	M489	141-82-2	InChI=1S/C3H4O4/c4-2(5)1-3(6)7/h1H2,(H,4,5)(H,6,7)	274999	2.57796	2.29728	2.47796
Training	M490	141-97-9	InChI=1S/C6H10O3/c1-3-9-6(8)4-5(2)7/h3-4H2,1-2H3	800001	2.21133	3.44945	2.89887
Training	M491	142-28-9	InChI=1S/C3H6Cl2/c4-2-1-3-5/h1-3H2	280000	2.60587	4.35479	2.70587
Training	M492	142-96-1	InChI=1S/C8H18O/c1-3-5-7-9-8-6-4-2/h3-8H2,1-2H3	26000	3.69973	4.06145	3.79973
Test	M493	143-50-0	InChI=1S/C10Cl10O/c11-2-1(21)3(12)6(15)4(2,13)8(17)5(2,14)7(3,16)9(6,18)10(8,19)20/t2-,3+,4-,5+,6+,7-,8+,9-	233.333	6.32278	6.3052	7.02903
Training	M494	144-62-7	InChI=1S/C2H2O4/c3-1(4)2(5)6/h(H,3,4)(H,5,6)	136900	2.81801	1.97198	2.33493
Training	M495	145-73-3	InChI=1S/C8H10O5/c9-7(10)5-3-1-2-4(13-3)6(5)8(11)12/h3-6H,1-2H2,(H,9,10)(H,11,12)/t3-,4+,5+,6-	32500	3.75801	2.1673	3.22727
Training	M496	148-01-6	InChI=1S/C8H7N3O5/c1-4-6(8(9)12)2-5(10(13)14)3-7(4)11(15)16/h2-3H,1H3,(H2,9,12)	165000	3.135	3.68622	3.26478
Test	M497	148-24-3	InChI=1S/C9H7NO/c11-8-5-1-3-7-4-2-6-10-9(7)8/h1-6,11H	4450	4.51348	3.28895	4.4037
Training	M498	148-79-8	InChI=1S/C10H7N3S/c1-2-4-8-7(3-1)12-10(13-8)9-5-14-6-11-9/h1-6H,(H,12,13)	814.078	5.39307	4.7295	4.87843
Test	M499	149-30-4	InChI=1S/C7H5NS2/c9-7-8-5-3-1-2-4-6(5)10-7/h1-4H,(H,8,9)	4100	4.61058	4.95796	5.01832
Test	M500	149-31-5	InChI=1S/C6H14O2/c1-3-6(8)5(2)4-7/h5-8H,3-4H2,1-2H3/t5-,6-/m1/s1	5.40999e+06	1.33933	2.49019	2.01703
Training	M501	150-19-6	InChI=1S/C7H8O2/c1-9-7-4-2-3-6(8)5-7/h2-5,8H,1H3	41099.9	3.48006	3.40529	3.39203
Training	M502	156-60-5	InChI=1S/C2H2Cl2/c3-1-2-4/h1-2H/b2-1+	220001	2.64409	4.39211	2.82944
Training	M503	189-55-9	InChI=1S/C24H14/c1-3-7-19-15(5-1)13-17-9-10-18-14-16-6-2-4-8-20(16)22-12-11-21(19)23(17)24(18)22/h1-14H	56.8821	6.72556	7.71091	6.82556
Test	M504	191-24-2	InChI=1S/C22H12/c1-3-13-7-9-15-11-12-16-10-8-14-4-2-6-18-17(5-1)19(13)21(15)22(16)20(14)18/h1-12H	13.6426	7.30653	7.16539	7.05369
Training	M505	192-97-2	InChI=1S/C20H12/c1-2-8-16-15(7-1)17-9-3-5-13-11-12-14-6-4-10-18(16)20(14)19(13)17/h1-12H	22.4318	7.05107	6.89735	6.95107
Training	M506	243-42-5	InChI=1S/C16H10O/c1-2-6-12-10-16-14(9-11(12)5-1)13-7-3-4-8-15(13)17-16/h1-10H	4000	4.73689	5.46855	5.21137
Test	M507	205-43-6	InChI=1S/C16H10S/c1-2-6-12-11(5-1)9-10-15-16(12)13-7-3-4-8-14(13)17-15/h1-10H	218.68	6.02999	5.76167	6.06346
Training	M508	206-44-0	InChI=1S/C16H10/c1-2-8-13-12(7-1)14-9-3-5-11-6-4-10-15(13)16(11)14/h1-10H	216.716	5.97	6.05755	6.01822
Training	M509	260-94-6	InChI=1S/C13H9N/c1-3-7-12-10(5-1)9-11-6-2-4-8-13(11)14-12/h1-9H	2050	4.94163	4.80529	4.99015
Training	M510	279-23-2	InChI=1S/C7H12/c1-2-7-4-3-6(1)5-7/h6-7H,1-5H2/t6-,7+	5164.63	4.27	4.46413	4.23585
Training	M511	288-32-4	InChI=1S/C3H4N2/c1-2-5-3-4-1/h1-3H,(H,4,5)	341000	2.30025	2.4905	2.40025
Training	M512	297-78-9	InChI=1S/C9H4Cl8O/c10-3-4(11)8(15)2-1(5(12)18-6(2)13)7(3,14)9(8,16)17/h1-2,5-6H/t1-,2+,5-,6+,7-,8+	8	7.71154	6.37122	7.21757
Training	M513	298-00-0	InChI=1S/C8H10NO5PS/c1-12-15(16,13-2)14-8-5-3-7(4-6-8)9(10)11/h3-6H,1-2H3	7.3	7.55697	6.37195	7.45697
Test	M514	298-02-2	InChI=1S/C7H17O2PS3/c1-4-8-10(11,9-5-2)13-7-12-6-3/h4-7H2,1-3H3	4	7.81354	7.37864	8.07379
Training	M515	298-04-4	InChI=1S/C8H19O2PS3/c1-4-9-11(12,10-5-2)14-8-7-13-6-3/h4-8H2,1-3H3	13	7.32445	7.43287	7.75912
Training	M516	298-46-4	InChI=1S/C15H12N2O/c16-15(18)17-13-7-3-1-5-11(13)9-10-12-6-2-4-8-14(12)17/h1-10H,(H2,16,18)	77700.1	3.48298	4.52793	3.94845
Training	M517	300-76-5	InChI=1S/C4H7Br2Cl2O4P/c1-10-13(9,11-2)12-3(5)4(6,7)8/h3H,1-2H3/t3-/m0/s1	0.35	9.03661	6.80172	8.3898
Training	M518	301-12-2	InChI=1S/C6H15O4PS2/c1-4-13(8)6-5-12-11(7,9-2)10-3/h4-6H2,1-3H3/t13-/m1/s1	150	6.21535	5.42846	6.11535
Training	M519	302-17-0	InChI=1S/C2H3Cl3O2/c3-2(4,5)1(6)7/h1,6-7H	500000	2.51957	3.52485	2.61957
Training	M520	309-00-2	InChI=1S/C12H8Cl6/c13-8-9(14)11(16)7-5-2-1-4(3-5)6(7)10(8,15)12(11,17)18/h1-2,4-7H,3H2/t4-,5+,6+,7-,10-,11+	28	7.11503	6.30228	7.01503
Training	M521	314-40-9	InChI=1S/C9H13BrN2O2/c1-4-5(2)12-8(13)7(10)6(3)11-9(12)14/h5H,4H2,1-3H3,(H,11,14)/t5-/m1/s1	119000	3.34129	4.37954	3.44129
Test	M522	319-84-6	InChI=1S/C6H6Cl6/c7-1-2(8)4(10)6(12)5(11)3(1)9/h1-6H/t1-,2-,3-,4+,5-,6-	723.333	5.6043	6.08567	5.35952
Training	M523	330-54-1	InChI=1S/C9H10Cl2N2O/c1-13(2)9(14)12-6-3-4-7(10)8(11)5-6/h3-5H,1-2H3,(H,12,14)	6026.69	4.58745	4.7832	4.48745
Test	M524	330-55-2	InChI=1S/C9H10Cl2N2O2/c1-13(15-2)9(14)12-6-3-4-7(10)8(11)5-6/h3-5H,1-2H3,(H,12,14)	530	5.67209	4.44662	4.76735
Training	M525	333-41-5	InChI=1S/C12H21N2O3PS/c1-6-15-18(19,16-7-2)17-11-8-10(5)13-12(14-11)9(3)4/h8-9H,6-7H2,1-5H3	1	8.48337	7.00975	8.56048
Training	M526	385-00-2	InChI=1S/C7H4F2O2/c8-4-2-1-3-5(9)6(4)7(10)11/h1-3H,(H,10,11)	59999.9	3.42079	3.25338	3.32079
Training	M527	420-04-2	InChI=1S/CH2N2/c2-1-3/h2H2	3200	4.11851	2.48423	2.9473
Test	M528	431-35-6	InChI=1S/C3H2BrF3O/c4-1-2(8)3(5,6)7/h1H2	200	5.97988	4.62227	4.65558
Training	M529	439-14-5	InChI=1S/C16H13ClN2O/c1-19-14-8-7-12(17)9-13(14)16(18-10-15(19)20)11-5-3-2-4-6-11/h2-9H,10H2,1H3	7541.33	4.577	5.10291	4.677
Training	M530	445-03-4	InChI=1S/C7H5ClF3N/c8-4-1-2-6(12)5(3-4)7(9,10)11/h1-3H,12H2	1640	5.07646	4.78573	4.97646
Training	M531	462-06-6	InChI=1S/C6H5F/c7-6-4-2-1-3-5-6/h1-5H	7294.75	4.11972	3.78981	4.01972
Training	M532	467-69-6	InChI=1S/C14H10O3/c15-13(16)14(17)11-7-3-1-5-9(11)10-6-2-4-8-12(10)14/h1-8,17H,(H,15,16)	86699.8	3.41653	3.71463	3.39081
Training	M533	470-90-6	InChI=1S/C12H14Cl3O4P/c1-3-17-20(16,18-4-2)19-12(8-13)10-6-5-9(14)7-11(10)15/h5-8H,3-4H2,1-2H3/b12-8+	0.25	9.15784	7.02082	8.07431
Training	M534	482-89-3	InChI=1S/C16H10N2O2/c19-15-9-5-1-3-7-11(9)17-13(15)14-16(20)10-6-2-4-8-12(10)18-14/h1-8,17-18H	78000.1	3.52664	5.15638	4.10208
Training	M535	500-99-2	InChI=1S/C8H10O3/c1-10-7-3-6(9)4-8(5-7)11-2/h3-5,9H,1-2H3	2700	4.75662	3.42753	4.59269
Test	M536	503-87-7	InChI=1S/C3H4N2OS/c6-2-1-4-3(7)5-2/h1H2,(H2,4,5,6,7)	19800	3.76832	3.39884	3.78644
Test	M537	504-24-5	InChI=1S/C5H6N2/c6-5-1-3-7-4-2-5/h1-4H,(H2,6,7)	3200	4.46851	2.71284	2.77826
Test	M538	504-60-9	InChI=1S/C5H8/c1-3-5-4-2/h3-5H,1H2,2H3/b5-4-	221500	2.48788	4.24839	3.54342
Training	M539	504-63-2	InChI=1S/C3H8O2/c4-2-1-3-5/h4-5H,1-3H2	7.417e+06	1.01112	1.80936	1.11112
Training	M540	525-66-6	InChI=1S/C16H21NO2/c1-12(2)17-10-14(18)11-19-16-9-5-7-13-6-3-4-8-15(13)16/h3-9,12,14,17-18H,10-11H2,1-2H3/t14-/m0/s1	4549.99	4.75586	4.41337	4.4244
Test	M541	527-60-6	InChI=1S/C9H12O/c1-6-4-7(2)9(10)8(3)5-6/h4-5,10H,1-3H3	3300	4.61563	3.88939	3.86605
Test	M542	532-27-4	InChI=1S/C8H7ClO/c9-6-8(10)7-4-2-1-3-5-7/h1-5H,6H2	52000	3.47319	4.32382	4.00787
Training	M543	532-55-8	InChI=1S/C8H5NOS/c10-8(9-6-11)7-4-2-1-3-5-7/h1-5H	1900	4.93396	4.558	4.83396
Training	M544	533-74-4	InChI=1S/C5H10N2S2/c1-6-3-7(2)5(8)9-4-6/h3-4H2,1-2H3	6616.67	4.38962	4.83076	4.48962
Training	M545	534-07-6	InChI=1S/C3H4Cl2O/c4-1-3(6)2-5/h1-2H2	552000	2.36176	3.84472	3.56645
Training	M546	534-13-4	InChI=1S/C3H8N2S/c1-4-3(6)5-2/h1-2H3,(H2,4,5,6)	16500	3.80028	3.68919	3.70028
Training	M547	534-52-1	InChI=1S/C7H6N2O5/c1-4-2-5(8(11)12)3-6(7(4)10)9(13)14/h2-3,10H,1H3	3200	4.79181	3.95557	4.69181
Training	M548	536-90-3	InChI=1S/C7H9NO/c1-9-7-4-2-3-6(8)5-7/h2-5H,8H2,1H3	279.999	5.64329	3.72271	4.51661
Training	M549	541-73-1	InChI=1S/C6H4Cl2/c7-5-2-1-3-6(8)4-5/h1-4H	1700	4.93687	4.70655	4.83687
Test	M550	542-75-6	InChI=1S/C3H4Cl2/c4-2-1-3-5/h1-2H,3H2	3438	4.5089	4.45127	3.15477
Test	M551	542-85-8	InChI=1S/C3H5NS/c1-2-4-3-5/h2H2,1H3	429.998	5.30677	4.11797	5.05891
Training	M552	554-00-7	InChI=1S/C6H5Cl2N/c7-4-1-2-6(9)5(8)3-4/h1-3H,9H2	1300	5.09562	4.63889	4.89475
Training	M553	555-60-2	InChI=1S/C9H5ClN4/c10-7-2-1-3-8(4-7)13-14-9(5-11)6-12/h1-4,13H	159000	3.10954	4.5219	3.28519
Training	M554	556-61-6	InChI=1S/C2H3NS/c1-3-2-4/h1H3	144	5.70566	4.00153	5.60566
Training	M555	556-82-1	InChI=1S/C5H10O/c1-5(2)3-4-6/h3,6H,4H2,1-2H3	144000	2.7768	3.07914	2.74902
Training	M556	563-12-2	InChI=1S/C9H22O4P2S4/c1-5-10-14(16,11-6-2)18-9-19-15(17,12-7-3)13-8-4/h5-9H2,1-4H3	2.84865e+06	2.13023	2.06596	2.05764
Test	M557	576-24-9	InChI=1S/C6H4Cl2O/c7-4-2-1-3-5(9)6(4)8/h1-3,9H	0.0237415	9.83668	9.30927	8.00631
Training	M558	576-26-1	InChI=1S/C8H10O/c1-6-4-3-5-7(2)8(6)9/h3-5,9H,1-2H3	2323.35	4.72083	4.2362	4.81494
Test	M559	578-46-1	InChI=1S/C7H8N2O2/c1-5-2-3-7(9(10)11)6(8)4-5/h2-4H,8H2,1H3	13949.2	4.03773	3.68144	4.08603
Training	M560	578-54-1	InChI=1S/C8H11N/c1-2-7-5-3-4-6-8(7)9/h3-6H,2,9H2,1H3	4619.4	4.41885	3.92192	4.31885
Training	M561	583-91-5	InChI=1S/C5H10O3S/c1-9-3-2-4(6)5(7)8/h4,6H,2-3H2,1H3,(H,7,8)/t4-/m0/s1	9977.57	4.17763	4.10656	4.75096
Training	M562	584-02-1	InChI=1S/C5H12O/c1-3-5(6)4-2/h5-6H,3-4H2,1-2H3	130289	2.83031	3.04291	2.93031
Training	M563	584-79-2	InChI=1S/C19H26O3/c1-7-8-13-12(4)16(10-15(13)20)22-18(21)17-14(9-11(2)3)19(17,5)6/h7,9,14,16-17H,1,8,10H2,2-6H3/t14-,16-,17-/m1/s1	1.78074e+06	2.22999	2.79698	2.32999
Training	M564	585-34-2	InChI=1S/C10H14O/c1-10(2,3)8-5-4-6-9(11)7-8/h4-7,11H,1-3H3	10.4315	7.15837	6.13132	7.05837
Training	M565	586-62-9	InChI=1S/C10H16/c1-8(2)10-6-4-9(3)5-7-10/h4H,5-7H2,1-3H3	4715.94	4.46072	4.56683	4.56072
Training	M566	589-16-2	InChI=1S/C8H11N/c1-2-7-3-5-8(9)6-4-7/h3-6H,2,9H2,1H3	2268.22	4.72775	5.19955	4.82775
Training	M567	590-86-3	InChI=1S/C5H10O/c1-5(2)3-4-6/h4-5H,3H2,1-2H3	63.9704	6.12919	4.17005	5.15738
Training	M568	591-27-5	InChI=1S/C6H7NO/c7-5-2-1-3-6(8)4-5/h1-4,8H,7H2	224252	2.68719	3.84405	3.22813
Training	M569	592-82-5	InChI=1S/C5H9NS/c1-2-3-4-6-5-7/h2-4H2,1H3	5697.36	4.30577	2.90553	4.20577
Test	M570	598-16-3	InChI=1S/C2HBr3/c3-1-2(4)5/h1H	988.208	5.42797	4.2801	4.18644
Test	M571	598-52-7	InChI=1S/C2H6N2S/c1-4-2(3)5/h1H3,(H3,3,4,5)	4222.34	4.3294	5.928	4.4549
Training	M572	602-01-7	InChI=1S/C7H6N2O4/c1-5-3-2-4-6(8(10)11)7(5)9(12)13/h2-4H,1H3	19193.9	3.97723	3.49881	3.87723
Training	M573	603-83-8	InChI=1S/C7H8N2O2/c1-5-6(8)3-2-4-7(5)9(10)11/h2-4H,8H2,1H3	551.352	5.44085	4.26251	4.94419
Training	M574	606-20-2	InChI=1S/C7H6N2O4/c1-5-6(8(10)11)3-2-4-7(5)9(12)13/h2-4H,1H3	15801.2	4.0617	3.97546	4.0845
Test	M575	608-31-1	InChI=1S/C6H5Cl2N/c7-4-2-1-3-5(8)6(4)9/h1-3H,9H2	19303.3	3.92393	4.22535	4.68541
Test	M576	608-93-5	InChI=1S/C6HCl5/c7-2-1-3(8)5(10)6(11)4(2)9/h1H	2163.18	5.06343	4.68224	4.95301
Training	M577	609-19-8	InChI=1S/C6H3Cl3O/c7-4-1-3(10)2-5(8)6(4)9/h1-2,10H	3379.51	4.76659	5.70564	5.70195
Training	M578	610-39-9	InChI=1S/C7H6N2O4/c1-5-2-3-6(8(10)11)7(4-5)9(12)13/h2-4H,1H3	627.266	5.46294	4.66854	5.36294
Training	M579	611-06-3	InChI=1S/C6H3Cl2NO2/c7-4-1-2-6(9(10)11)5(8)3-4/h1-3H	3267.93	4.76903	4.31055	4.85279
Training	M580	611-19-8	InChI=1S/C7H6Cl2/c8-5-6-3-1-2-4-7(6)9/h1-4H,5H2	3522.51	4.66005	4.86537	4.63404
Test	M581	613-37-6	InChI=1S/C13H12O/c1-14-13-9-7-12(8-10-13)11-5-3-2-4-6-11/h2-10H,1H3	434.76	5.62712	4.72671	4.68947
Test	M582	615-36-1	InChI=1S/C6H6BrN/c7-5-3-1-2-4-6(5)8/h1-4H,8H2	233.43	5.86743	5.31984	5.04732
Training	M583	616-72-8	InChI=1S/C8H8N2O4/c1-5-3-6(2)8(10(13)14)4-7(5)9(11)12/h3-4H,1-2H3	3420.94	4.75847	4.5929	4.65847
Training	M584	616-73-9	InChI=1S/C7H6N2O5/c1-4-2-7(10)6(9(13)14)3-5(4)8(11)12/h2-3,10H,1H3	24544.4	3.907	4.41607	4.007
Training	M585	618-62-2	InChI=1S/C6H3Cl2NO2/c7-4-1-5(8)3-6(2-4)9(10)11/h1-3H	3391.66	4.75289	3.96117	4.65289
Training	M586	618-85-9	InChI=1S/C7H6N2O4/c1-5-2-6(8(10)11)4-7(3-5)9(12)13/h2-4H,1H3	7019.75	4.41407	4.8344	4.51407
Test	M587	618-87-1	InChI=1S/C6H5N3O4/c7-4-1-5(8(10)11)3-6(2-4)9(12)13/h1-3H,7H2	44952.7	3.60998	4.25989	4.72825
Training	M588	619-15-8	InChI=1S/C7H6N2O4/c1-5-4-6(8(10)11)2-3-7(5)9(12)13/h2-4H,1H3	3739.72	4.68755	3.91988	4.62576
Training	M589	619-24-9	InChI=1S/C7H4N2O2/c8-5-6-2-1-3-7(4-6)9(10)11/h1-4H	2765.03	4.72891	4.23266	4.62891
Training	M590	619-72-7	InChI=1S/C7H4N2O2/c8-5-6-1-3-7(4-2-6)9(10)11/h1-4H	48100	3.48847	3.77683	3.57688
Training	M591	622-78-6	InChI=1S/C8H7NS/c10-7-9-6-8-4-2-1-3-5-8/h1-5H,6H2	49764.9	3.47688	3.77683	3.57688
Test	M592	625-40-1	InChI=1S/C3H3ClO2/c4-2-1-3(5)6/h1-2H,(H,5,6)/b2-1+	3464.11	4.48779	3.75374	3.58434
Training	M593	625-53-6	InChI=1S/C3H8N2S/c1-2-5-3(4)6/h2H2,1H3,(H3,4,5,6)	53794.7	3.28702	3.16749	3.38702
Training	M594	626-43-7	InChI=1S/C6H5Cl2N/c7-4-1-5(8)3-6(9)2-4/h1-3H,9H2	21773.6	3.87163	3.70683	3.77163
Training	M595	629-11-8	InChI=1S/C6H14O2/c7-5-3-1-2-4-6-8/h7-8H,1-6H2	816.92	5.16034	4.60793	5.06034
Training	M596	630-20-6	InChI=1S/C2H2Cl4/c3-1-2(4,5)6/h1H2	710176	2.37355	2.30237	2.31258
Test	M597	632-22-4	InChI=1S/C5H12N2O/c1-6(2)5(8)7(3)4/h1-4H3	16609.5	3.84471	5.03795	3.94674
Training	M598	634-66-2	InChI=1S/C6H2Cl4/c7-3-1-2-4(8)6(10)5(3)9/h1-2H	5.38979e+06	1.60266	2.94889	2.44932
Training	M599	634-67-3	InChI=1S/C6H4Cl3N/c7-3-1-2-4(10)6(9)5(3)8/h1-2H,10H2	738.69	5.42482	5.46228	5.52482
Training	M600	634-83-3	InChI=1S/C6H3Cl4N/c7-2-1-3(11)5(9)6(10)4(2)8/h1H,11H2	857.988	5.42996	5.09249	5.32996
Training	M601	634-90-2	InChI=1S/C6H2Cl4/c7-3-1-4(8)6(10)5(9)2-3/h1-2H	598.383	5.55726	5.44225	5.45726
Test	M602	635-12-1	InChI=1S/C14H8O2/c15-13-5-6-14(16)12-8-10-4-2-1-3-9(10)7-11(12)13/h1-8H	250.751	5.91926	5.42513	5.48135
Training	M603	636-30-6	InChI=1S/C6H4Cl3N/c7-3-1-5(9)6(10)2-4(3)8/h1-2H,10H2	609.634	5.50821	4.63997	4.88825
Training	M604	657-24-9	InChI=1S/C4H11N5/c1-9(2)4(7)8-3(5)6/h1-2H3,(H5,5,6,7,8)	1255.73	5.01225	5.04914	5.11225
Training	M605	680-31-9	InChI=1S/C6H18N3OP/c1-7(2)11(10,8(3)4)9(5)6/h1-6H3	86018	3.31875	3.5359	3.41875
Test	M606	693-21-0	InChI=1S/C4H8N2O7/c7-5(8)12-3-1-11-2-4-13-6(9)10/h1-4H2	7.29961e+06	1.42921	2.15575	2.66234
Training	M607	700-38-9	InChI=1S/C7H7NO3/c1-5-2-3-6(8(10)11)7(9)4-5/h2-4,9H,1H3	70353.8	3.33779	3.21868	3.23779
Training	M608	701-82-6	InChI=1S/C7H8N2O2/c8-7(11)9-5-2-1-3-6(10)4-5/h1-4,10H,(H3,8,9,11)	21163.1	3.8567	3.77824	3.7567
Test	M609	709-98-8	InChI=1S/C9H9Cl2NO/c1-2-9(13)12-6-3-4-7(10)8(11)5-6/h3-5H,2H2,1H3,(H,12,13)	133298	3.21379	2.74782	3.03463
Test	M610	723-46-6	InChI=1S/C10H11N3O3S/c1-7-6-10(12-16-7)13-17(14,15)9-4-2-8(11)3-5-9/h2-6H,11H2,1H3,(H,12,13)	2775.74	4.96022	4.93695	5.11159
Training	M611	731-27-1	InChI=1S/C10H13Cl2FN2O2S2/c1-8-4-6-9(7-5-8)15(18-10(11,12)13)19(16,17)14(2)3/h4-7H,1-3H3	171381	3.30669	3.75136	3.40669
Training	M612	732-11-6	InChI=1S/C11H12NO4PS2/c1-15-17(18,16-2)19-7-12-10(13)8-5-3-4-6-9(8)11(12)14/h3-6H,7H2,1-2H3	347.241	5.96087	6.29459	5.9087
Test	M613	738-70-5	InChI=1S/C14H18N4O3/c1-19-10-5-8(6-11(20-2)12(10)21-3)4-9-7-17-14(16)18-13(9)15/h5-7H,4H2,1-3H3,(H4,15,16,17,18)	297.534	5.98934	6.19842	7.19052
Training	M614	741-58-2	InChI=1S/C14H24NO4PS3/c1-12(2)18-20(21,19-13(3)4)22-11-10-15-23(16,17)14-8-6-5-7-9-14/h5-9,12-13,15H,10-11H2,1-4H3	168416	3.37297	3.48546	3.33125
Training	M615	760-23-6	InChI=1S/C4H6Cl2/c1-2-4(6)3-5/h2,4H,1,3H2/t4-/m0/s1	6173.28	4.30638	4.76229	4.40638
Training	M616	767-00-0	InChI=1S/C7H5NO/c8-5-6-1-3-7(9)4-2-6/h1-4,9H	9529.98	4.0969	4.55412	4.02752
Test	M617	770-35-4	InChI=1S/C9H12O2/c1-8(10)7-11-9-5-3-2-4-6-9/h2-6,8,10H,7H2,1H3/t8-/m0/s1	19164.2	3.8999	3.07739	3.15345
Training	M618	786-19-6	InChI=1S/C11H16ClO2PS3/c1-3-13-15(16,14-4-2)18-9-17-11-7-5-10(12)6-8-11/h5-8H,3-4,9H2,1-2H3	833561	2.61419	3.46353	3.17207
Training	M619	793-24-8	InChI=1S/C18H24N2/c1-14(2)13-15(3)19-17-9-11-18(12-10-17)20-16-7-5-4-6-8-16/h4-12,14-15,19-20H,13H2,1-3H3/t15-/m0/s1	62.6245	6.63203	7.92841	8.20171
Training	M620	818-61-1	InChI=1S/C5H8O3/c1-2-5(7)8-4-3-6/h2,6H,1,3-4H2	220.639	5.72121	6.75789	5.70656
Training	M621	822-06-0	InChI=1S/C8H12N2O2/c11-7-9-5-3-1-2-4-6-10-8-12/h1-6H2	11588	4.1618	2.49744	2.8774
Training	M622	825-44-5	InChI=1S/C8H6O2S/c9-11(10)6-5-7-3-1-2-4-8(7)11/h1-6H	88042.6	3.27593	4.10565	3.37593
Test	M623	834-12-8	InChI=1S/C9H17N5S/c1-5-10-7-12-8(11-6(2)3)14-9(13-7)15-4/h6H,5H2,1-4H3,(H2,10,11,12,13,14)	19149.7	4.0745	4.04784	3.91107
Training	M624	836-30-6	InChI=1S/C12H10N2O2/c15-14(16)12-8-6-11(7-9-12)13-10-4-2-1-3-5-10/h1-9,13H	26385.3	3.9095	4.78089	4.0095
Test	M625	839-90-7	InChI=1S/C9H15N3O6/c13-4-1-10-7(16)11(2-5-14)9(18)12(3-6-15)8(10)17/h13-15H,1-6H2	1219.46	5.33086	5.32844	5.25937
Training	M626	841-06-5	InChI=1S/C11H21N5OS/c1-8(2)13-10-14-9(12-6-5-7-17-3)15-11(16-10)18-4/h8H,5-7H2,1-4H3,(H2,12,13,14,15,16)	1.03885e+06	2.41703	1.23403	2.32631
Training	M627	867-27-6	InChI=1S/C6H15O4PS/c1-4-12-6-5-10-11(7,8-2)9-3/h4-6H2,1-3H3	33153.4	3.81033	4.66161	3.87811
Training	M628	868-77-9	InChI=1S/C6H10O3/c1-5(2)6(8)9-4-3-7/h7H,1,3-4H2,2H3	8.20146	7.20053	5.08156	6.93872
Training	M629	868-85-9	InChI=1S/C2H7O3P/c1-4-6(3)5-2/h6H,1-2H3	321331	2.53463	2.77591	2.63463
Training	M630	872-50-4	InChI=1S/C5H9NO/c1-6-4-2-3-5(6)7/h2-4H2,1H3	22339.6	3.64713	4.26251	3.98905
Training	M631	877-43-0	InChI=1S/C11H11N/c1-8-3-6-11-10(7-8)5-4-9(2)12-11/h3-7H,1-2H3	1950.66	4.9063	2.97405	3.21248
Training	M632	882-09-7	InChI=1S/C10H11ClO3/c1-10(2,9(12)13)14-8-5-3-7(11)4-6-8/h3-6H,1-2H3,(H,12,13)	51882.6	3.6167	4.50801	3.7167
Training	M633	886-50-0	InChI=1S/C10H19N5S/c1-6-11-7-12-8(15-10(2,3)4)14-9(13-7)16-5/h6H2,1-5H3,(H2,11,12,13,14,15)	80959.5	3.47439	4.28501	3.57439
Training	M634	900-95-8	InChI=1S/3C6H5.C2H4O2.Sn/c3*1-2-4-6-5-3-1;1-2(3)4;/h3*1-5H;1H3,(H,3,4);/q;;;;+1/p-1	7016.59	4.76566	5.23028	4.83159
Training	M635	919-30-2	InChI=1S/C9H23NO3Si/c1-4-11-14(12-5-2,13-6-3)9-7-8-10/h4-10H2,1-3H3	66.0871	6.525	7.085	6.425
Training	M636	935-95-5	InChI=1S/C6H2Cl4O/c7-2-1-3(8)5(10)6(11)4(2)9/h1,11H	23.1604	7.00054	5.99084	6.90054
Training	M637	944-22-9	InChI=1S/C10H15OPS2/c1-3-11-12(13,4-2)14-10-8-6-5-7-9-10/h5-9H,3-4H2,1-2H3/t12-/m1/s1	605.489	5.60941	4.8627	5.70941
Training	M638	947-04-6	InChI=1S/C12H23NO/c14-12-10-8-6-4-2-1-3-5-7-9-11-13-12/h1-11H2,(H,13,14)	5.47371	7.55688	6.95668	7.65688
Training	M639	950-37-8	InChI=1S/C6H11N2O4PS3/c1-10-5-7-8(6(9)16-5)4-15-13(14,11-2)12-3/h4H2,1-3H3	90400.3	3.52431	4.40875	3.62431
Training	M640	957-51-7	InChI=1S/C16H17NO/c1-17(2)16(18)15(13-9-5-3-6-10-13)14-11-7-4-8-12-14/h3-12,15H,1-2H3	5.06596	7.6743	6.67013	7.5743
Training	M641	959-98-8	InChI=1S/C9H6Cl6O3S/c10-5-6(11)8(13)4-2-18-19(16)17-1-3(4)7(5,12)9(8,14)15/h3-4H,1-2H2/t3-,4-,7-,8+,19?/m1/s1	49360.7	3.91613	5.15335	4.21928
Training	M642	1013-23-6	InChI=1S/C12H8OS/c13-14-11-7-3-1-5-9(11)10-6-2-4-8-12(10)14/h1-8H	274.767	5.86262	5.66826	5.76262
Training	M643	1014-69-3	InChI=1S/C8H15N5S/c1-5(2)10-7-11-6(9-3)12-8(13-7)14-4/h5H,1-4H3,(H2,9,10,11,12,13)	21303	4.00056	4.43433	4.10056
Test	M644	1014-70-6	InChI=1S/C8H15N5S/c1-4-9-6-11-7(10-5-2)13-8(12-6)14-3/h4-5H2,1-3H3,(H2,9,10,11,12,13)	26000	3.91402	4.50219	3.69292
Training	M645	1021-19-8	InChI=1S/C9H6Cl6O2/c10-4-5(11)8(13)3-2(1-17-6(3)16)7(4,12)9(8,14)15/h2-3,6,16H,1H2/t2-,3-,6+,7-,8+/m0/s1	84120	3.63003	4.59612	3.73003
Test	M646	1024-57-3	InChI=1S/C10H5Cl7O/c11-3-1-2(4-5(3)18-4)9(15)7(13)6(12)8(1,14)10(9,16)17/h1-5H/t1-,2-,3+,4+,5-,8-,9+/m1/s1	596.678	5.81456	4.78762	5.30531
Training	M647	1031-07-8	InChI=1S/C9H6Cl6O4S/c10-5-6(11)8(13)4-2-19-20(16,17)18-1-3(4)7(5,12)9(8,14)15/h3-4H,1-2H2/t3-,4-,7-,8+/m0/s1	260.718	6.21009	5.90739	6.11009
Training	M648	1071-83-6	InChI=1S/C3H8NO5P/c5-3(6)1-4-2-10(7,8)9/h4H,1-2H2,(H,5,6)(H2,7,8,9)	303.826	5.74545	5.5456	5.64545
Training	M649	1085-98-9	InChI=1S/C9H11Cl2FN2O2S2/c1-13(2)18(15,16)14(17-9(10,11)12)8-6-4-3-5-7-8/h3-7H,1-2H3	78836.9	3.62601	2.82134	3.52601
Training	M650	1113-02-6	InChI=1S/C5H12NO4PS/c1-6-5(7)4-12-11(8,9-2)10-3/h4H2,1-3H3,(H,6,7)	710.15	5.47742	6.10624	5.57742
Training	M651	1114-71-2	InChI=1S/C10H21NOS/c1-4-7-8-11(6-3)10(12)13-9-5-2/h4-9H2,1-3H3	20.9839	6.98635	4.43756	6.61092
Training	M652	1126-79-0	InChI=1S/C10H14O/c1-2-3-9-11-10-7-5-4-6-8-10/h4-8H,2-3,9H2,1H3	4358.53	4.53738	5.13021	4.63738
Test	M653	1134-23-2	InChI=1S/C11H21NOS/c1-3-12(11(13)14-4-2)10-8-6-5-7-9-10/h10H,3-9H2,1-2H3	4587.16	4.67161	4.63216	4.71001
Training	M654	1138-52-9	InChI=1S/C14H22O/c1-13(2,3)10-7-11(14(4,5)6)9-12(15)8-10/h7-9,15H,1-6H3	14179.3	4.1629	4.91268	4.2629
Test	M655	1190-28-9	InChI=1S/C6H11O6PS2/c1-11-13(14,12-2)15-4(6(9)10)3-5(7)8/h4H,3H2,1-2H3,(H,7,8)(H,9,10)/t4-/m1/s1	2259.69	5.0841	5.74159	5.86484
Training	M656	1190-29-0	InChI=1S/C8H15O6PS2/c1-4-14-7(9)5-6(8(10)11)17-15(16,12-2)13-3/h6H,4-5H2,1-3H3,(H,10,11)/t6-/m0/s1	78262.5	3.58689	5.04327	3.68689
Training	M657	1194-65-6	InChI=1S/C7H3Cl2N/c8-6-2-1-3-7(9)5(6)4-10/h1-3H	1991.49	4.93638	5.35635	4.83638
Training	M658	1194-98-5	InChI=1S/C7H6O3/c8-4-5-3-6(9)1-2-7(5)10/h1-4,9-10H	4978.46	4.44316	4.32305	4.34842
Test	M659	1241-94-7	InChI=1S/C20H27O4P/c1-3-5-12-18(4-2)17-22-25(21,23-19-13-8-6-9-14-19)24-20-15-10-7-11-16-20/h6-11,13-16,18H,3-5,12,17H2,1-2H3/t18-/m0/s1	54725	3.821	2.94846	3.06152
Training	M660	1320-18-9	InChI=1S/C15H18Cl2O5/c1-3-4-14(18)22-10(2)8-21-15(19)9-20-13-6-5-11(16)7-12(13)17/h5-7,10H,3-4,8-9H2,1-2H3/t10-/m0/s1	144.539	6.3831	7.54479	6.2831
Test	M661	1401-69-0	InChI=1S/C46H77NO17/c1-13-33-30(22-58-45-42(57-12)41(56-11)37(52)26(5)60-45)18-23(2)14-15-31(49)24(3)19-29(16-17-48)39(25(4)32(50)20-34(51)62-33)64-44-38(53)36(47(9)10)40(27(6)61-44)63-35-21-46(8,55)43(54)28(7)59-35/h14-15,17-18,24-30,32-33,35-45,50,52-55H,13,16,19-22H2,1-12H3/b15-14-,23-18-/t24-,25+,26+,27-,28-,29-,30-,32-,33+,35+,36-,37+,38+,39-,40-,41-,42+,43+,44-,45-,46+/m1/s1	3148.06	5.4639	5.45086	4.95172
Training	M662	1420-07-1	InChI=1S/C10H12N2O5/c1-10(2,3)7-4-6(11(14)15)5-8(9(7)13)12(16)17/h4-5,13H,1-3H3	178305	3.12943	5.4889	3.02943
Training	M663	1445-75-6	InChI=1S/C7H17O3P/c1-6(2)9-11(5,8)10-7(3)4/h6-7H,1-5H3	352.544	5.7085	4.9121	5.6085
Training	M664	1477-55-0	InChI=1S/C8H12N2/c9-5-7-2-1-3-8(4-7)6-10/h1-4H,5-6,9-10H2	2388.97	4.75595	4.77314	4.68203
Training	M665	1490-04-6	InChI=1S/C10H20O/c1-7(2)9-5-4-8(3)6-10(9)11/h7-11H,4-6H2,1-3H3/t8-,9-,10+/m0/s1	17440	3.95232	2.85005	3.26435
Training	M666	1516-32-1	InChI=1S/C5H12N2S/c1-2-3-4-7-5(6)8/h2-4H2,1H3,(H3,6,7,8)	37485.4	3.54746	4.13386	3.64746
Training	M667	1563-38-8	InChI=1S/C10H12O2/c1-10(2)6-7-4-3-5-8(11)9(7)12-10/h3-5,11H,6H2,1-2H3	23221.9	3.84948	3.93293	3.74948
Training	M668	1563-66-2	InChI=1S/C12H15NO3/c1-12(2)7-8-5-4-6-9(10(8)16-12)15-11(14)13-3/h4-6H,7H2,1-3H3,(H,13,14)	33686.1	3.81744	3.87102	3.91744
Training	M669	1570-64-5	InChI=1S/C7H7ClO/c1-5-4-6(8)2-3-7(5)9/h2-4,9H,1H3	38.8273	6.56493	4.28306	4.77596
Test	M670	1570-65-6	InChI=1S/C7H6Cl2O/c1-4-2-5(8)3-6(9)7(4)10/h2-3,10H,1H3	653.898	5.43253	3.96376	4.74166
Training	M671	1582-09-8	InChI=1S/C13H16F3N3O4/c1-3-5-17(6-4-2)12-10(18(20)21)7-9(13(14,15)16)8-11(12)19(22)23/h7-8H,3-6H2,1-2H3	814.391	5.61457	4.35508	5.51457
Test	M672	1593-77-7	InChI=1S/C18H35NO/c1-16-14-19(15-17(2)20-16)18-12-10-8-6-4-3-5-7-9-11-13-18/h16-18H,3-15H2,1-2H3/t16-,17+	205.685	6.13624	5.91768	5.85422
Training	M673	1596-84-5	InChI=1S/C6H12N2O3/c1-8(2)7-5(9)3-4-6(10)11/h3-4H2,1-2H3,(H,7,9)(H,10,11)	1900.59	4.9257	5.63166	5.0257
Training	M674	1610-18-0	InChI=1S/C10H19N5O/c1-6(2)11-8-13-9(12-7(3)4)15-10(14-8)16-5/h6-7H,1-5H3,(H2,11,12,13,14,15)	106196	3.32664	1.81329	2.66063
Training	M675	1634-04-4	InChI=1S/C5H12O/c1-5(2,3)6-4/h1-4H3	7825.28	4.05171	4.27693	3.95171
Training	M676	1646-87-3	InChI=1S/C7H14N2O3S/c1-7(2,13(4)11)5-9-12-6(10)8-3/h5H,1-4H3,(H,8,10)/b9-5+	318234	2.81167	3.77276	3.39991
Training	M677	1646-88-4	InChI=1S/C7H14N2O4S/c1-7(2,14(4,11)12)5-9-13-6(10)8-3/h5H,1-4H3,(H,8,10)/b9-5+	90.5155	6.39014	3.94577	4.74447
Test	M678	1689-83-4	InChI=1S/C7H3I2NO/c8-5-1-4(3-10)2-6(9)7(5)11/h1-2,11H	467.268	5.89971	4.09577	4.2097
Training	M679	1689-84-5	InChI=1S/C7H3Br2NO/c8-5-1-4(3-10)2-6(9)7(5)11/h1-2,11H	2911.62	4.97821	7.49859	3.86886
Test	M680	1689-99-2	InChI=1S/C15H17Br2NO2/c1-2-3-4-5-6-7-14(19)20-15-12(16)8-11(10-18)9-13(15)17/h8-9H,2-7H2,1H3	12150.9	4.52081	4.63177	5.33927
Test	M681	1698-60-8	InChI=1S/C10H8ClN3O/c11-9-8(12)6-13-14(10(9)15)7-4-2-1-3-5-7/h1-6H,12H2	25.2924	6.94266	6.59803	6.82292
Test	M682	1702-17-6	InChI=1S/C6H3Cl2NO2/c7-3-1-2-4(8)9-5(3)6(10)11/h1-2H,(H,10,11)	81428.2	3.37253	4.10419	3.89083
Training	M683	1715-40-8	InChI=1S/C8H5BrCl6/c9-2-3-1-6(12)4(10)5(11)7(3,13)8(6,14)15/h3H,1-2H2/t3-,6+,7-/m1/s1	461422	2.93112	3.87783	3.03112
Training	M684	1717-00-6	InChI=1S/C2H3Cl2F/c1-2(3,4)5/h1H3	207.913	5.75012	6.60277	5.85012
Training	M685	1740-19-8	InChI=1S/C20H28O2/c1-13(2)14-6-8-16-15(12-14)7-9-17-19(16,3)10-5-11-20(17,4)18(21)22/h6,8,12-13,17H,5,7,9-11H2,1-4H3,(H,21,22)/t17-,19+,20-/m0/s1	80150.3	3.57385	4.70416	3.554
Training	M686	1745-81-9	InChI=1S/C9H10O/c1-2-5-8-6-3-4-7-9(8)10/h2-4,6-7,10H,1,5H2	1103.11	5.08505	5.94929	5.18505
Test	M687	1746-81-2	InChI=1S/C9H11ClN2O2/c1-12(14-2)9(13)11-8-5-3-7(10)4-6-8/h3-6H,1-2H3,(H,11,13)	15757.7	4.13424	4.04794	4.20679
Training	M688	1757-42-2	InChI=1S/C6H10O/c1-5-2-3-6(7)4-5/h5H,2-4H2,1H3/t5-/m1/s1	14859.8	3.81985	3.96532	3.91985
Training	M689	1758-73-2	InChI=1S/CH4N2O2S/c2-1(3)6(4)5/h(H3,2,3)(H,4,5)	248975	2.63775	3.54349	2.84059
Training	M690	1759-28-0	InChI=1S/C6H7NS/c1-3-6-5(2)7-4-8-6/h3-4H,1H2,2H3	451577	2.44284	2.71254	2.54284
Training	M691	1761-61-1	InChI=1S/C7H5BrO2/c8-6-1-2-7(10)5(3-6)4-9/h1-4,10H	159672	3.1	4.46181	3.45978
Training	M692	1825-21-4	InChI=1S/C7H3Cl5O/c1-13-7-5(11)3(9)2(8)4(10)6(7)12/h1H3	3742.67	4.87454	3.87867	4.77454
Training	M693	1836-75-5	InChI=1S/C12H7Cl2NO3/c13-8-1-6-12(11(14)7-8)18-10-4-2-9(3-5-10)15(16)17/h1-7H	27.5621	7.01315	6.13894	6.91315
Test	M694	1836-77-7	InChI=1S/C12H6Cl3NO3/c13-7-5-10(14)12(11(15)6-7)19-9-3-1-8(2-4-9)16(17)18/h1-6H	243.31	6.117	5.95131	5.94151
Training	M695	1861-32-1	InChI=1S/C10H6Cl4O4/c1-17-9(15)3-5(11)7(13)4(10(16)18-2)8(14)6(3)12/h1-2H3	441.868	5.8758	6.1919	5.9758
Training	M696	1861-40-1	InChI=1S/C13H16F3N3O4/c1-3-5-6-17(4-2)12-10(18(20)21)7-9(13(14,15)16)8-11(12)19(22)23/h7-8H,3-6H2,1-2H3	4645.94	4.85833	5.63259	4.95833
Training	M697	1879-09-0	InChI=1S/C12H18O/c1-8-6-9(2)11(13)10(7-8)12(3,4)5/h6-7,13H,1-5H3	1159.13	5.18695	6.04153	5.61812
Training	M698	1886-81-3	InChI=1S/C18H30O3S/c1-2-3-4-5-6-7-8-9-10-14-17-21-22(19,20)18-15-12-11-13-16-18/h11-13,15-16H,2-10,14,17H2,1H3	6410.08	4.70701	4.83371	4.80701
Training	M699	1897-45-6	InChI=1S/C8Cl4N2/c9-5-3(1-13)6(10)8(12)7(11)4(5)2-14	9121.77	4.46466	6.00461	4.94975
Training	M700	1912-24-9	InChI=1S/C8H14ClN5/c1-4-10-7-12-6(9)13-8(14-7)11-5(2)3/h5H,4H2,1-3H3,(H2,10,11,12,13,14)	98.3471	6.34105	4.98275	5.78388
Training	M701	1912-26-1	InChI=1S/C9H16ClN5/c1-4-11-8-12-7(10)13-9(14-8)15(5-2)6-3/h4-6H2,1-3H3,(H,11,12,13,14)	38447.8	3.77631	4.30242	3.87631
Training	M702	1918-00-9	InChI=1S/C8H6Cl2O3/c1-13-7-5(10)3-2-4(9)6(7)8(11)12/h2-3H,1H3,(H,11,12)	12990.3	4.23085	4.54527	4.13085
Test	M703	1918-02-1	InChI=1S/C6H3Cl3N2O2/c7-1-3(10)2(8)5(9)11-4(1)6(12)13/h(H2,10,11)(H,12,13)	120163	3.30307	4.29682	4.04154
Training	M704	1918-16-7	InChI=1S/C11H14ClNO/c1-9(2)13(11(14)8-12)10-6-4-3-5-7-10/h3-7,9H,8H2,1-2H3	38750.3	3.73742	3.6799	3.63742
Test	M705	1929-73-3	InChI=1S/C14H18Cl2O4/c1-2-3-6-18-7-8-19-14(17)10-20-13-5-4-11(15)9-12(13)16/h4-5,9H,2-3,6-8,10H2,1H3	11835	4.4336	4.63462	4.82866
Test	M706	1929-77-7	InChI=1S/C10H21NOS/c1-4-7-11(8-5-2)10(12)13-9-6-3/h4-9H2,1-3H3	3545.29	4.75858	5.41928	4.83748
Test	M707	1929-82-4	InChI=1S/C6H3Cl4N/c7-5-3-1-2-4(11-5)6(8,9)10/h1-3H	2043.98	5.05296	4.84624	4.42155
Training	M708	1982-47-4	InChI=1S/C15H15ClN2O2/c1-18(2)15(19)17-12-5-9-14(10-6-12)20-13-7-3-11(16)4-8-13/h3-10H,1-2H3,(H,17,19)	3903.34	4.87208	5.29237	4.97208
Training	M709	1982-49-6	InChI=1S/C14H20N2O/c1-11-7-5-6-10-13(11)16-14(17)15-12-8-3-2-4-9-12/h2-4,8-9,11,13H,5-7,10H2,1H3,(H2,15,16,17)/t11-,13-/m1/s1	2357.21	4.99369	5.52545	5.09369
Training	M710	2008-58-4	InChI=1S/C7H5Cl2NO/c8-4-2-1-3-5(9)6(4)7(10)11/h1-3H,(H2,10,11)	14723.1	4.11082	4.86546	4.35093
Training	M711	2032-59-9	InChI=1S/C11H16N2O2/c1-8-7-9(15-11(14)12-2)5-6-10(8)13(3)4/h5-7H,1-4H3,(H,12,14)	197268	3.02354	4.1799	3.17689
Training	M712	2032-65-7	InChI=1S/C11H15NO2S/c1-7-5-9(14-11(13)12-3)6-8(2)10(7)15-4/h5-6H,1-4H3,(H,12,13)	61.6815	6.56262	4.38611	4.81519
Training	M713	2050-68-2	InChI=1S/C12H8Cl2/c13-11-5-1-9(2-6-11)10-3-7-12(14)8-4-10/h1-8H	6145.03	4.55997	4.784	4.65997
Training	M714	2051-60-7	InChI=1S/C12H9Cl/c13-12-9-5-4-8-11(12)10-6-2-1-3-7-10/h1-9H	84.5606	6.3485	5.5312	5.95905
Training	M715	2051-61-8	InChI=1S/C12H9Cl/c13-12-8-4-7-11(9-12)10-5-2-1-3-6-10/h1-9H	710	5.42441	5.33088	5.32441
Training	M716	2051-62-9	InChI=1S/C12H9Cl/c13-12-8-6-11(7-9-12)10-4-2-1-3-5-10/h1-9H	430	5.6422	5.39437	5.5422
Training	M717	2136-79-0	InChI=1S/C8H2Cl4O4/c9-3-1(7(13)14)4(10)6(12)2(5(3)11)8(15)16/h(H,13,14)(H,15,16)	676.6	5.65241	5.39437	5.5422
Training	M718	2142-68-9	InChI=1S/C8H7ClO/c1-6(10)7-4-2-3-5-8(7)9/h2-5H,1H3	2339.94	4.81999	4.74569	4.71999
Test	M719	2157-19-9	InChI=1S/C9H8Cl6O2/c10-5-6(11)8(13)4(2-17)3(1-16)7(5,12)9(8,14)15/h3-4,16-17H,1-2H2/t3-,4-,7-,8+/m0/s1	121386	3.47319	4.38549	3.90333
Training	M720	2164-08-1	InChI=1S/C13H18N2O2/c16-12-10-7-4-8-11(10)14-13(17)15(12)9-5-2-1-3-6-9/h9H,1-8H2,(H,14,17)	357.079	5.817	4.48563	5.4433
Training	M721	2164-17-2	InChI=1S/C10H11F3N2O/c1-15(2)9(16)14-8-5-3-4-7(6-8)10(11,12)13/h3-6H,1-2H3,(H,14,16)	8324.99	4.44548	3.72093	4.34548
Test	M722	2176-62-7	InChI=1S/C5Cl5N/c6-1-2(7)4(9)11-5(10)3(1)8	34635.3	3.86072	4.42839	3.98866
Training	M723	2207-01-4	InChI=1S/C8H16/c1-7-5-3-4-6-8(7)2/h7-8H,3-6H2,1-2H3/t7-,8-/m0/s1	803.674	5.14496	5.46325	5.31341
Training	M724	2212-67-1	InChI=1S/C9H17NOS/c1-2-12-9(11)10-7-5-3-4-6-8-10/h2-8H2,1H3	5402.2	4.53997	4.85046	4.63997
Test	M725	2257-09-2	InChI=1S/C9H9NS/c11-8-10-7-6-9-4-2-1-3-5-9/h1-5H,6-7H2	12985.8	4.09936	4.5654	4.02207
Training	M726	2274-67-1	InChI=1S/C10H10Cl3O4P/c1-15-18(14,16-2)17-10(6-11)8-4-3-7(12)5-9(8)13/h3-6H,1-2H3/b10-6+	264.013	6.09888	4.87728	5.48526
Training	M727	2274-74-0	InChI=1S/C12H6Cl4N2S/c13-7-1-3-8(4-2-7)19-18-17-12-6-10(15)9(14)5-11(12)16/h1-6H/b18-17+	2.12397	8.21948	6.33166	7.63295
Training	M728	2275-14-1	InChI=1S/C11H15Cl2O2PS3/c1-3-14-16(17,15-4-2)19-8-18-11-7-9(12)5-6-10(11)13/h5-7H,3-4,8H2,1-2H3	289.36	6.11526	7.29886	7.60263
Training	M729	2275-23-2	InChI=1S/C8H18NO4PS2/c1-7(8(10)9-2)15-5-6-16-14(11,12-3)13-4/h7H,5-6H2,1-4H3,(H,9,10)/t7-/m1/s1	0.990003	8.46275	8.35463	8.36275
Training	M730	2303-17-5	InChI=1S/C10H16Cl3NOS/c1-6(2)14(7(3)4)10(15)16-5-8(11)9(12)13/h6-7H,5H2,1-4H3	201.457	6.17964	5.36224	6.08346
Test	M731	2310-17-0	InChI=1S/C12H15ClNO4PS2/c1-3-16-19(20,17-4-2)21-8-14-10-6-5-9(13)7-11(10)18-12(14)15/h5-7H,3-4,8H2,1-2H3	198.594	6.26766	6.47329	5.8132
Training	M732	2312-35-8	InChI=1S/C19H26O4S/c1-5-14-21-24(20)23-18-9-7-6-8-17(18)22-16-12-10-15(11-13-16)19(2,3)4/h1,10-13,17-18H,6-9,14H2,2-4H3/t17-,18-,24-/m1/s1	0.705119	8.69639	7.55031	8.1287
Training	M733	2367-76-2	InChI=1S/C6H2BrF3/c7-6-4(9)1-3(8)2-5(6)10/h1-2H	39.3297	6.72952	5.89113	5.74861
Test	M734	2385-85-5	InChI=1S/C10Cl12/c11-1-2(12)7(17)4(14)3(13,5(1,15)9(7,19)20)6(1,16)10(21,22)8(2,4)18/t1-,2+,3+,4-,5+,6-,7-,8+	14683.5	4.57	4.76152	3.92922
Training	M735	2402-79-1	InChI=1S/C5HCl4N/c6-2-1-3(7)5(9)10-4(2)8/h1H	39.7549	6.73683	7.59071	6.83683
Training	M736	2403-88-5	InChI=1S/C9H19NO/c1-8(2)5-7(11)6-9(3,4)10-8/h7,10-11H,5-6H2,1-4H3	1544.4	5.00784	5.21084	4.90784
Training	M737	2425-06-1	InChI=1S/C10H9Cl4NO2S/c11-9(12)10(13,14)18-15-7(16)5-3-1-2-4-6(5)8(15)17/h1-2,5-6,9H,3-4H2/t5-,6+	222196	3.19617	3.6115	3.29617
Test	M738	2431-50-7	InChI=1S/C4H5Cl3/c1-3(6)4(7)2-5/h4H,1-2H2/t4-/m0/s1	1525.46	5.0192	5.22615	5.00587
Training	M739	2432-99-7	InChI=1S/C11H23NO2/c12-10-8-6-4-2-1-3-5-7-9-11(13)14/h1-10,12H2,(H,13,14)	63128.3	3.50363	4.90614	3.94213
Training	M740	2437-79-8	InChI=1S/C12H6Cl4/c13-7-1-3-9(11(15)5-7)10-4-2-8(14)6-12(10)16/h1-6H	514917	2.75363	3.61479	2.85363
Training	M741	2439-01-2	InChI=1S/C10H6N2OS2/c1-5-2-3-6-7(4-5)12-9-8(11-6)14-10(13)15-9/h2-4H,1H3	24.0726	6.98824	6.22383	6.88824
Training	M742	2439-35-2	InChI=1S/C7H13NO2/c1-4-7(9)10-6-5-8(2)3/h4H,1,5-6H2,2-3H3	73.3346	6.29059	5.28486	5.91095
Training	M743	2464-37-1	InChI=1S/C14H9ClO3/c15-8-5-6-10-9-3-1-2-4-11(9)14(18,13(16)17)12(10)7-8/h1-7,18H,(H,16,17)/t14-/m1/s1	18059.8	4.15938	3.59858	3.99314
Training	M744	2489-77-2	InChI=1S/C4H10N2S/c1-5-4(7)6(2)3/h1-3H3,(H,5,7)	2312.58	4.70852	3.91921	3.95669
Training	M745	2498-66-0	InChI=1S/C18H10O2/c19-17-13-7-3-4-8-14(13)18(20)16-12-6-2-1-5-11(12)9-10-15(16)17/h1-10H	1.68246e+06	2.18613	3.98931	2.85511
Training	M746	2536-31-4	InChI=1S/C15H11ClO3/c1-19-14(17)15(18)12-5-3-2-4-10(12)11-7-6-9(16)8-13(11)15/h2-8,18H,1H3/t15-/m0/s1	60.7412	6.65537	5.27433	4.95719
Training	M747	2539-17-5	InChI=1S/C7H4Cl4O2/c1-13-7-5(11)3(9)2(8)4(10)6(7)12/h12H,1H3	4862.69	4.73129	4.0248	4.63129
Training	M748	2540-82-1	InChI=1S/C6H12NO4PS2/c1-7(5-8)6(9)4-14-12(13,10-2)11-3/h5H,4H2,1-3H3	212.821	6.08237	4.94255	5.98237
Training	M749	2556-42-5	InChI=1S/C14H28N2S4/c1-5-9-15(10-6-2)13(17)19-20-14(18)16(11-7-3)12-8-4/h5-12H2,1-4H3	22068.8	4.20356	5.52678	4.78935
Training	M750	2581-34-2	InChI=1S/C7H7NO3/c1-5-4-6(9)2-3-7(5)8(10)11/h2-4,9H,1H3	99.8765	6.18561	7.35945	6.28561
Training	M751	2593-15-9	InChI=1S/C5H5Cl3N2OS/c1-2-11-4-9-3(10-12-4)5(6,7)8/h2H2,1H3	24246.2	4.00898	3.51961	3.92856
Training	M752	2631-40-5	InChI=1S/C11H15NO2/c1-8(2)9-6-4-5-7-10(9)14-11(13)12-3/h4-8H,1-3H3,(H,12,13)	3122.72	4.79157	5.64153	4.89157
Training	M753	2635-10-1	InChI=1S/C11H15NO3S/c1-7-5-9(15-11(13)12-3)6-8(2)10(7)16(4)14/h5-6H,1-4H3,(H,12,13)/t16-/m1/s1	7022.81	4.53606	3.66935	4.43606
Training	M754	2636-26-2	InChI=1S/C9H10NO3PS/c1-11-14(15,12-2)13-9-5-3-8(7-10)4-6-9/h3-6H,1-2H3	56.4437	6.63438	4.00877	4.93158
Training	M755	2642-71-9	InChI=1S/C12H16N3O3PS2/c1-3-17-19(20,18-4-2)21-9-15-12(16)10-7-5-6-8-11(10)13-14-15/h5-8H,3-4,9H2,1-2H3	137.743	6.39923	6.11016	6.49923
Training	M756	2668-24-8	InChI=1S/C7H5Cl3O2/c1-12-4-2-3(8)5(9)6(10)7(4)11/h2,11H,1H3	0.790341	8.45911	7.06708	8.35911
Training	M757	2675-77-6	InChI=1S/C8H8Cl2O2/c1-11-7-3-6(10)8(12-2)4-5(7)9/h3-4H,1-2H3	873.83	5.37466	4.5501	5.47466
Test	M758	2687-94-7	InChI=1S/C12H23NO/c1-2-3-4-5-6-7-10-13-11-8-9-12(13)14/h2-11H2,1H3	5527.25	4.55266	4.66631	4.60846
Training	M759	2691-41-0	InChI=1S/C4H8N8O8/c13-9(14)5-1-6(10(15)16)3-8(12(19)20)4-7(2-5)11(17)18/h1-4H2	18311.1	4.2088	4.42029	4.3088
Test	M760	2699-79-8	InChI=1S/F2O2S/c1-5(2,3)4	11027.8	3.96637	3.14683	3.28551
Training	M761	2703-37-9	InChI=1S/C6H15O3PS3/c1-4-13(7)6-5-12-10(11,8-2)9-3/h4-6H2,1-3H3/t13-/m1/s1	1593.72	5.21647	4.32212	5.11647
Training	M762	2741-06-2	InChI=1S/C9H12N2S/c1-2-10-9(12)11-8-6-4-3-5-7-8/h3-7H,2H2,1H3,(H2,10,11,12)	1552.93	5.06477	6.44068	6.18915
Test	M763	2764-72-9	InChI=1S/C12H12N2/c1-3-7-13-9-10-14-8-4-2-6-12(14)11(13)5-1/h1-8H,9-10H2	81964.9	3.35175	4.97688	3.87752
Training	M764	2782-91-4	InChI=1S/C5H12N2S/c1-6(2)5(8)7(3)4/h1-4H3	861.24	5.1862	4.78624	5.0862
Training	M765	2797-51-5	InChI=1S/C10H6ClNO2/c11-7-8(12)10(14)6-4-2-1-3-5(6)9(7)13/h1-4H,12H2	1.209e+06	2.23483	4.30504	2.71702
Training	M766	2809-21-4	InChI=1S/C2H8O7P2/c1-2(3,10(4,5)6)11(7,8)9/h3H,1H3,(H2,4,5,6)(H2,7,8,9)	2133.59	4.98482	4.09469	4.12935
Training	M767	2837-89-0	InChI=1S/C2HClF4/c3-1(4)2(5,6)7/h1H/t1-/m1/s1	349092	2.59212	3.88692	2.65556
Test	M768	2855-13-2	InChI=1S/C10H22N2/c1-9(2)4-8(12)5-10(3,6-9)7-11/h8H,4-7,11-12H2,1-3H3/t8-,10-/m0/s1	237082	2.8563	4.70938	3.43683
Training	M769	2867-47-2	InChI=1S/C8H15NO2/c1-7(2)8(10)11-6-5-9(3)4/h1,5-6H2,2-4H3	21232.7	3.86947	4.18955	3.76947
Training	M770	2921-88-2	InChI=1S/C9H11Cl3NO3PS/c1-3-14-17(18,15-4-2)16-9-7(11)5-6(10)8(12)13-9/h5H,3-4H2,1-2H3	73591.5	3.67797	3.88029	3.69577
Training	M771	2973-78-6	InChI=1S/C7H5BrO2/c8-6-3-5(4-9)1-2-7(6)10/h1-4,10H	0.0573374	9.54479	7.98864	9.19078
Test	M772	3060-89-7	InChI=1S/C9H11BrN2O2/c1-12(14-2)9(13)11-8-5-3-7(10)4-6-8/h3-6H,1-2H3,(H,11,13)	135355	3.28199	3.72792	3.61708
Training	M773	3064-70-8	InChI=1S/C2Cl6O2S/c3-1(4,5)11(9,10)2(6,7)8	51081.9	3.77001	4.23536	3.87001
Test	M774	3090-36-6	InChI=1S/C12H24O2.3C4H9.Sn/c1-2-3-4-5-6-7-8-9-10-11-12(13)14;3*1-3-4-2;/h2-11H2,1H3,(H,13,14);3*1,3-4H2,2H3;/q;;;;+1/p-1	281.441	6.24024	6.51622	5.65322
Test	M775	3268-49-3	InChI=1S/C4H8OS/c1-6-4-2-3-5/h3H,2,4H2,1H3	2278.74	4.66005	4.90872	4.75801
Test	M776	3347-22-6	InChI=1S/C14H4N2O2S2/c15-5-9-10(6-16)20-14-12(18)8-4-2-1-3-7(8)11(17)13(14)19-9/h1-4H	12800.7	4.36453	4.12691	4.30051
Training	M777	3369-52-6	InChI=1S/C9H6Cl6O/c10-5-6(11)8(13)4-2-16-1-3(4)7(5,12)9(8,14)15/h3-4H,1-2H2/t3-,4+,7+,8-	300.832	6.05679	4.91963	4.95142
Training	M778	3380-34-5	InChI=1S/C12H7Cl3O2/c13-7-1-3-11(9(15)5-7)17-12-4-2-8(14)6-10(12)16/h1-6,16H	464.468	5.79476	5.56789	5.54171
Training	M779	3383-96-8	InChI=1S/C16H20O6P2S3/c1-17-23(25,18-2)21-13-5-9-15(10-6-13)27-16-11-7-14(8-12-16)22-24(26,19-3)20-4/h5-12H,1-4H3	628.313	5.87065	5.46791	5.77065
Training	M780	3401-80-7	InChI=1S/C7H4Cl2O3/c8-3-1-2-4(9)6(10)5(3)7(11)12/h1-2,10H,(H,11,12)	0.00443783	10.6688	9.1671	8.98828
Test	M781	3452-97-9	InChI=1S/C9H20O/c1-8(5-6-10)7-9(2,3)4/h8,10H,5-7H2,1-4H3/t8-/m0/s1	62019	3.3666	3.68551	4.21209
Test	M782	3478-94-2	InChI=1S/C16H21Cl2NO2/c1-12-5-2-3-8-19(12)9-4-10-21-16(20)13-6-7-14(17)15(18)11-13/h6-7,11-12H,2-5,8-10H2,1H3/t12-/m0/s1	15498.9	4.32854	4.43155	3.78176
Test	M783	3483-12-3	InChI=1S/C4H10O2S2/c5-3(1-7)4(6)2-8/h3-8H,1-2H2/t3-,4-/m0/s1	882.771	5.24238	5.59326	4.8977
Training	M784	3547-04-4	InChI=1S/C14H12Cl2/c1-10(11-2-6-13(15)7-3-11)12-4-8-14(16)9-5-12/h2-10H,1H3	43961.3	3.75686	3.23451	3.65686
Test	M785	3547-33-9	InChI=1S/C10H22OS/c1-2-3-4-5-6-7-9-12-10-8-11/h11H,2-10H2,1H3	26.5263	6.85587	5.90645	5.98656
Training	M786	3689-24-5	InChI=1S/C8H20O5P2S2/c1-5-9-14(16,10-6-2)13-15(17,11-7-3)12-8-4/h5-8H2,1-4H3	643.466	5.69976	4.41042	5.343
Training	M787	3691-35-8	InChI=1S/C23H15ClO3/c24-16-12-10-15(11-13-16)19(14-6-2-1-3-7-14)23(27)20-21(25)17-8-4-5-9-18(17)22(20)26/h1-13,19-20H/t19-/m1/s1	2.32575	8.20726	8.21735	8.10726
Training	M788	3739-38-6	InChI=1S/C13H10O3/c14-13(15)10-5-4-8-12(9-10)16-11-6-2-1-3-7-11/h1-9H,(H,14,15)	240.041	5.95057	5.87525	5.85057
Training	M789	3766-81-2	InChI=1S/C12H17NO2/c1-4-9(2)10-7-5-6-8-11(10)15-12(14)13-3/h5-9H,4H2,1-3H3,(H,13,14)/t9-/m0/s1	2025.96	5.0099	5.24649	4.98241
Training	M790	3778-73-2	InChI=1S/C7H15Cl2N2O2P/c8-2-4-10-14(12)11(6-3-9)5-1-7-13-14/h1-7H2,(H,10,12)/t14-/m1/s1	125.965	6.31653	4.63737	5.07701
Test	M791	3813-05-6	InChI=1S/C9H6ClNO3S/c10-5-2-1-3-6-8(5)11(4-7(12)13)9(14)15-6/h1-3H,4H2,(H,12,13)	151192	3.20727	3.81234	4.57216
Training	M792	3868-61-9	InChI=1S/C9H4Cl6O2/c10-4-5(11)8(13)3-2(1-17-6(3)16)7(4,12)9(8,14)15/h2-3H,1H2/t2-,3+,7+,8-/m0/s1	175444	3.30834	3.99411	3.40834
Training	M793	3878-19-1	InChI=1S/C11H8N2O/c1-2-5-9-8(4-1)12-11(13-9)10-6-3-7-14-10/h1-7H,(H,12,13)	28389.6	3.81212	5.40355	4.30606
Training	M794	4044-65-9	InChI=1S/C8H4N2S2/c11-5-9-7-1-2-8(4-3-7)10-6-12/h1-4H	4932.83	4.59079	4.30134	4.69079
Training	M795	4104-75-0	InChI=1S/C8H10N2S/c1-10(8(9)11)7-5-3-2-4-6-7/h2-6H,1H3,(H2,9,11)	66.5799	6.3974	5.51191	6.2974
Training	M796	4151-50-2	InChI=1S/C10H6F17NO2S/c1-2-28-31(29,30)10(26,27)8(21,22)6(17,18)4(13,14)3(11,12)5(15,16)7(19,20)9(23,24)25/h28H,2H2,1H3	305708	3.23667	4.56531	3.35426
Training	M797	4169-04-4	InChI=1S/C9H12O2/c1-8(7-10)11-9-5-3-2-4-6-9/h2-6,8,10H,7H2,1H3/t8-/m1/s1	106.811	6.15377	7.33491	6.25377
Training	M798	4180-23-8	InChI=1S/C10H12O/c1-3-4-9-5-7-10(11-2)8-6-9/h3-8H,1-2H3/b4-3+	360304	2.61419	3.475	2.93867
Training	M799	4454-05-1	InChI=1S/C6H10O2/c1-7-6-4-2-3-5-8-6/h3,5-6H,2,4H2,1H3/t6-/m0/s1	93091.7	3.08853	3.06097	3.02885
Training	M800	4457-71-0	InChI=1S/C6H14O2/c1-6(2-4-7)3-5-8/h6-8H,2-5H2,1H3	103532	3.05745	3.60733	3.07343
Training	M801	4658-28-0	InChI=1S/C7H11N7S/c1-4(2)9-5-10-6(13-14-8)12-7(11-5)15-3/h4H,1-3H3,(H,9,10,11,12)	1.90629e+06	2.07252	2.46054	2.00164
Training	M802	4710-17-2	InChI=1S/C8H12N2O2S/c1-10(2)13(11,12)9-8-6-4-3-5-7-8/h3-7,9H,1-2H3	23112.8	3.93774	3.806	3.83774
Training	M803	4920-77-8	InChI=1S/C7H7NO3/c1-5-3-2-4-6(9)7(5)8(10)11/h2-4,9H,1H3	73104.2	3.32113	3.62744	3.42113
Test	M804	4979-32-2	InChI=1S/C19H26N2S2/c1-3-9-15(10-4-1)21(16-11-5-2-6-12-16)23-19-20-17-13-7-8-14-18(17)22-19/h7-8,13-16H,1-6,9-12H2	42545.3	3.91092	3.7437	3.87074
Training	M805	5103-71-9	InChI=1S/C10H6Cl8/c11-3-1-2-4(5(3)12)9(16)7(14)6(13)8(2,15)10(9,17)18/h2-5H,1H2/t2-,3+,4-,5+,8-,9+/m0/s1	37.1287	7.04284	5.88799	6.94284
Training	M806	5234-68-4	InChI=1S/C12H13NO2S/c1-9-11(16-8-7-15-9)12(14)13-10-5-3-2-4-6-10/h2-6H,7-8H2,1H3,(H,13,14)	338.788	5.8417	6.73811	6.96848
Training	M807	5259-88-1	InChI=1S/C12H13NO4S/c1-9-11(18(15,16)8-7-17-9)12(14)13-10-5-3-2-4-6-10/h2-6H,7-8H2,1H3,(H,13,14)	95877.7	3.44528	4.93341	4.20681
Training	M808	5267-27-6	InChI=1S/C7H7N3O4/c1-4-2-5(8)7(10(13)14)3-6(4)9(11)12/h2-3H,8H2,1H3	50964.7	3.58752	4.3775	3.68752
Training	M809	5392-40-5	InChI=1S/C10H16O/c1-9(2)5-4-6-10(3)7-8-11/h5,7-8H,4,6H2,1-3H3/b10-7-	2393.74	4.80343	4.00724	4.70343
Training	M810	5436-43-1	InChI=1S/C12H6Br4O/c13-7-1-3-11(9(15)5-7)17-12-4-2-8(14)6-10(12)16/h1-6H	22337.7	4.33741	5.05585	4.43741
Training	M811	5598-13-0	InChI=1S/C7H7Cl3NO3PS/c1-12-15(16,13-2)14-7-5(9)3-4(8)6(10)11-7/h3H,1-2H3	61.0819	6.72266	7.37042	6.62266
Training	M812	5836-29-3	InChI=1S/C19H16O3/c20-18-15-9-3-4-11-16(15)22-19(21)17(18)14-10-5-7-12-6-1-2-8-13(12)14/h1-4,6,8-9,11,14,20H,5,7,10H2/t14-/m1/s1	0.544342	8.73	7.50257	8.7829
Training	M813	5902-51-2	InChI=1S/C9H13ClN2O2/c1-5-6(10)7(13)12(8(14)11-5)9(2,3)4/h1-4H3,(H,11,14)	10376.4	4.31974	5.25436	4.41974
Training	M814	5915-41-3	InChI=1S/C9H16ClN5/c1-5-11-7-12-6(10)13-8(14-7)15-9(2,3)4/h5H2,1-4H3,(H2,11,12,13,14,15)	68913.5	3.52288	4.4032	3.62288
Training	M815	5989-27-5	InChI=1S/C10H16/c1-8(2)10-6-4-9(3)5-7-10/h4,10H,1,5-7H2,2-3H3/t10-/m1/s1	12573.1	4.03484	4.76138	4.00077
Training	M816	6165-51-1	InChI=1S/C16H18/c1-12-9-10-13(2)16(11-12)14(3)15-7-5-4-6-8-15/h4-11,14H,1-3H3/t14-/m1/s1	890.755	5.37311	5.1726	5.27311
Test	M817	6317-18-6	InChI=1S/C3H2N2S2/c4-1-6-3-7-2-5/h3H2	154.758	5.92493	6.21144	5.57993
Training	M818	6358-85-6	InChI=1S/C32H26Cl2N6O4/c1-19(41)29(31(43)35-23-9-5-3-6-10-23)39-37-27-15-13-21(17-25(27)33)22-14-16-28(26(34)18-22)38-40-30(20(2)42)32(44)36-24-11-7-4-8-12-24/h3-18,29-30H,1-2H3,(H,35,43)(H,36,44)/b39-37+,40-38+/t29-,30+	352.966	6.25126	4.66116	6.15126
Training	M819	6382-06-5	InChI=1S/C8H16O3/c1-3-4-5-6-11-8(10)7(2)9/h7,9H,3-6H2,1-2H3/t7-/m0/s1	5.09016	7.49796	8.70871	6.75365
Test	M820	6393-42-6	InChI=1S/C7H7N3O4/c1-4-2-5(9(11)12)7(8)6(3-4)10(13)14/h2-3H,8H2,1H3	291602	2.83	3.06835	3.07932
Training	M821	6422-86-2	InChI=1S/C24H38O4/c1-5-9-11-19(7-3)17-27-23(25)21-13-15-22(16-14-21)24(26)28-18-20(8-4)12-10-6-2/h13-16,19-20H,5-12,17-18H2,1-4H3/t19-,20+	25951.5	4.17752	4.25943	4.27752
Training	M822	6485-55-8	InChI=1S/C6H13NO/c1-5-3-7-4-6(2)8-5/h5-7H,3-4H2,1-2H3/t5-,6-/m1/s1	0.117959	8.98962	6.92091	7.37425
Training	M823	6515-38-4	InChI=1S/C5H2Cl3NO/c6-2-1-3(7)5(10)9-4(2)8/h1H,(H,9,10)	322874	2.78858	3.22037	2.88858
Training	M824	6864-37-5	InChI=1S/C15H30N2/c1-10-7-12(3-5-14(10)16)9-13-4-6-15(17)11(2)8-13/h10-15H,3-9,16-17H2,1-2H3/t10-,11+,12+,13-,14-,15-/m1/s1	12495.3	4.28058	4.3895	4.24662
Training	M825	6923-22-4	InChI=1S/C7H14NO5P/c1-6(5-7(9)8-2)13-14(10,11-3)12-4/h5H,1-4H3,(H,8,9)/b6-5+	14227.9	4.19548	4.63643	4.29548
Training	M826	6972-05-0	InChI=1S/C3H8N2S/c1-5(2)3(4)6/h1-2H3,(H2,4,6)	10.7365	6.9869	4.17408	6.66645
Training	M827	7159-96-8	InChI=1S/C9H11NO3/c1-2-13-9(12)10-7-4-3-5-8(11)6-7/h3-6,11H,2H2,1H3,(H,10,12)	73050.3	3.39451	3.77157	3.49451
Training	M828	7205-94-9	InChI=1S/C7H7ClOS/c8-6-10(9)7-4-2-1-3-5-7/h1-5H,6H2	11566.8	4.17895	3.49168	4.07895
Training	M829	7287-19-6	InChI=1S/C10H19N5S/c1-6(2)11-8-13-9(12-7(3)4)15-10(14-8)16-5/h6-7H,1-5H3,(H2,11,12,13,14,15)	3331.68	4.86	4.3509	4.76
Test	M830	7696-12-0	InChI=1S/C19H25NO4/c1-11(2)9-14-15(19(14,3)4)18(23)24-10-20-16(21)12-7-5-6-8-13(12)17(20)22/h9,14-15H,5-8,10H2,1-4H3/t14-,15+/m1/s1	17383.5	4.28022	4.63772	4.44438
Training	M831	8001-35-2	InChI=1S/C10H10Cl8/c11-2-8(7(15)16)4-1-10(17,18)9(8,3-12)6(14)5(4)13/h4-7H,1-3H2/t4?,5-,6+,8-,9-/m0/s1	56.1892	6.86715	5.27067	5.1896
Training	M832	8003-34-7	InChI=1S/C21H28O3/c1-7-8-9-10-15-12-17(14(4)19(15)22)24-20(23)18-16(11-13(2)3)21(18,5)6/h7-9,11-12,14,16-18H,1,10H2,2-6H3/b9-8-/t14-,16-,17+,18-/m1/s1	11.1913	7.46758	7.32245	7.36758
Test	M833	9002-92-0	InChI=1S/C22H46O6/c1-2-3-4-5-6-7-8-9-10-11-13-24-15-17-26-19-21-28-22-20-27-18-16-25-14-12-23/h23H,2-22H2,1H3	14.8553	7.43728	6.65546	7.30265
Training	M834	9002-93-1	InChI=1S/C16H26O2/c1-15(2,3)12-16(4,5)13-6-8-14(9-7-13)18-11-10-17/h6-9,17H,10-12H2,1-5H3	3977.97	4.79893	4.58891	4.69893
Training	M835	9016-45-9	InChI=1S/C25H44O6/c1-2-3-4-5-6-7-8-9-24-10-12-25(13-11-24)31-23-22-30-21-20-29-19-18-28-17-16-27-15-14-26/h10-13,26H,2-9,14-23H2,1H3	19709.8	4.34938	5.67181	4.44938
Training	M836	10004-44-1	InChI=1S/C4H5NO2/c1-3-2-4(6)5-7-3/h2H,1H3,(H,5,6)	2743.62	4.5577	5.16166	4.6577
Training	M837	10061-01-5	InChI=1S/C3H4Cl2/c4-2-1-3-5/h1-2H,3H2/b2-1+	31357.6	3.54886	2.87435	2.78676
Test	M838	10202-92-3	InChI=1S/C7H7N3O4/c1-4-6(9(11)12)3-2-5(8)7(4)10(13)14/h2-3H,8H2,1H3	11014.8	4.25281	4.45127	3.15477
Test	M839	10222-01-2	InChI=1S/C3H2Br2N2O/c4-3(5,1-6)2(7)8/h(H2,7,8)	5766.14	4.62269	4.32028	4.83224
Training	M840	10265-92-6	InChI=1S/C2H8NO2PS/c1-5-6(3,4)7-2/h1-2H3,(H2,3,4)/t6-/m0/s1	525.144	5.42934	4.38696	5.52807
Training	M841	10453-86-8	InChI=1S/C22H26O3/c1-15(2)10-19-20(22(19,3)4)21(23)25-14-17-12-18(24-13-17)11-16-8-6-5-7-9-16/h5-10,12-13,19-20H,11,14H2,1-4H3/t19-,20-/m0/s1	647.484	5.71825	4.1237	5.06197
Training	M842	10552-74-6	InChI=1S/C14H17NO6/c1-8(2)20-13(16)10-5-11(14(17)21-9(3)4)7-12(6-10)15(18)19/h5-9H,1-4H3	3.22824	7.96128	6.39748	7.86128
Training	M843	10605-21-7	InChI=1S/C9H9N3O2/c1-14-9(13)12-8-10-6-4-2-3-5-7(6)11-8/h2-5H,1H3,(H2,10,11,12,13)	1838.79	5.01693	4.95799	5.01609
Training	M844	11070-44-3	InChI=1S/C9H10O3/c1-5-3-2-4-6-7(5)9(11)12-8(6)10/h6H,2-4H2,1H3/t6-/m1/s1	162.309	6.01022	4.04044	4.60056
Training	M845	12427-38-2	InChI=1S/C4H8N2S4/c7-3(8)5-1-2-6-4(9)10/h1-2H2,(H2,5,7,8)(H2,6,9,10)	166148	3.10662	3.69704	3.20662
Test	M846	12771-68-5	InChI=1S/C15H16N2O2/c1-19-14-6-4-12(5-7-14)15(18,11-2-3-11)13-8-16-10-17-9-13/h4-11,18H,2-3H2,1H3/t15-/m1/s1	604.667	5.62723	5.35078	5.19141
Training	M847	12789-03-6	InChI=1S/C10H6Cl8/c11-3-1-2-4(5(3)12)9(16)7(14)6(13)8(2,15)10(9,17)18/h2-5H,1H2/t2-,3-,4+,5+,8-,9+/m1/s1	159883	3.40875	2.94731	3.30875
Training	M848	13071-79-9	InChI=1S/C9H21O2PS3/c1-6-10-12(13,11-7-2)15-8-14-9(3,4)5/h6-8H2,1-5H3	24.6354	7.06848	6.73811	6.96848
Training	M849	13121-70-5	InChI=1S/3C6H11.H2O.Sn/c3*1-2-4-6-5-3-1;;/h3*1H,2-6H2;1H2;/q;;;;+1/p-1	0.413966	8.96868	7.84929	8.86868
Training	M850	13194-48-4	InChI=1S/C8H19O2PS2/c1-4-7-12-11(9,10-6-3)13-8-5-2/h4-8H2,1-3H3	6.4691	7.57358	5.37678	6.75603
Training	M851	13457-18-6	InChI=1S/C14H20N3O5PS/c1-5-19-14(18)11-9-17-12(15-10(11)4)8-13(16-17)22-23(24,20-6-2)21-7-3/h8-9H,5-7H2,1-4H3	308.134	6.08339	6.43422	6.99349
Training	M852	13593-03-8	InChI=1S/C12H15N2O3PS/c1-3-15-18(19,16-4-2)17-12-9-13-10-7-5-6-8-11(10)14-12/h5-9H,3-4H2,1-2H3	0.287621	9.01583	7.05268	8.91583
Training	M853	13674-84-5	InChI=1S/C9H18Cl3O4P/c1-7(4-10)14-17(13,15-8(2)5-11)16-9(3)6-12/h7-9H,4-6H2,1-3H3/t7-,8-,9-/m1/s1	0.724766	8.65511	6.4394	8.0826
Test	M854	13684-63-4	InChI=1S/C16H16N2O4/c1-11-5-3-6-12(9-11)18-16(20)22-14-8-4-7-13(10-14)17-15(19)21-2/h3-10H,1-2H3,(H,17,19)(H,18,20)	1165	5.41124	5.20529	5.43179
Training	M855	13826-35-2	InChI=1S/C13H12O2/c14-10-11-5-4-8-13(9-11)15-12-6-2-1-3-7-12/h1-9,14H,10H2	273.37	5.86478	4.99067	5.76478
Training	M856	14062-34-1	InChI=1S/C7H9N3O/c8-6-3-1-2-5(4-6)7(11)10-9/h1-4H,8-9H2,(H,10,11)	83502.5	3.25775	3.0822	3.15775
Training	M857	14315-14-1	InChI=1S/C9H8S/c1-7-2-3-9-8(6-7)4-5-10-9/h2-6H,1H3	2255.25	4.81773	2.1276	3.45025
Training	M858	14433-76-2	InChI=1S/C12H25NO/c1-4-5-6-7-8-9-10-11-12(14)13(2)3/h4-11H2,1-3H3	18827.2	4.02479	4.68343	4.12479
Test	M859	14698-29-4	InChI=1S/C13H11NO5/c1-2-14-5-8(13(16)17)12(15)7-3-10-11(4-9(7)14)19-6-18-10/h3-5H,2,6H2,1H3,(H,16,17)	6552.6	4.60061	4.68462	4.51896
Training	M860	14816-18-3	InChI=1S/C12H15N2O3PS/c1-3-15-18(19,16-4-2)17-14-12(10-13)11-8-6-5-7-9-11/h5-9H,3-4H2,1-2H3/b14-12-	5252.73	4.75427	4.05099	4.6536
Training	M861	14938-35-3	InChI=1S/C11H16O/c1-2-3-4-5-10-6-8-11(12)9-7-10/h6-9,12H,2-5H2,1H3	0.445989	8.56617	6.96572	8.46617
Training	M862	15165-67-0	InChI=1S/C9H8Cl2O3/c1-5(9(12)13)14-8-3-2-6(10)4-7(8)11/h2-5H,1H3,(H,12,13)/t5-/m1/s1	1903.48	5.09164	4.4247	4.99164
Test	M863	15245-44-0	InChI=1S/C6H3N3O8/c10-5-2(7(12)13)1-3(8(14)15)6(11)4(5)9(16)17/h1,10-11H	104271	3.37119	4.32951	3.83079
Training	M864	15263-53-3	InChI=1S/C7H15N3O2S2/c1-10(2)5(3-13-6(8)11)4-14-7(9)12/h5H,3-4H2,1-2H3,(H2,8,11)(H2,9,12)	1.54934e+06	2.18523	4.30297	3.28909
Training	M865	15307-86-5	InChI=1S/C14H11Cl2NO2/c15-10-5-3-6-11(16)14(10)17-12-7-2-1-4-9(12)8-13(18)19/h1-7,17H,8H2,(H,18,19)	15606.7	4.2782	5.53487	4.3782
Training	M866	15545-48-9	InChI=1S/C10H13ClN2O/c1-7-4-5-8(6-9(7)11)12-10(14)13(2)3/h4-6H,1-3H3,(H,12,14)	24416.7	3.94003	5.44309	3.84003
Training	M867	15687-27-1	InChI=1S/C13H18O2/c1-9(2)8-11-4-6-12(7-5-11)10(3)13(14)15/h4-7,9-10H,8H2,1-3H3,(H,14,15)/t10-/m0/s1	64985.4	3.50164	4.57285	3.60164
Test	M868	15862-07-4	InChI=1S/C12H7Cl3/c13-10-7-12(15)11(14)6-9(10)8-4-2-1-3-5-8/h1-7H	11311.5	4.35733	4.80992	4.53606
Training	M869	15972-60-8	InChI=1S/C14H20ClNO2/c1-4-11-7-6-8-12(5-2)14(11)16(10-18-3)13(17)9-15/h6-8H,4-5,9-10H2,1-3H3	618.004	5.64	6.1313	5.74
Training	M870	16118-49-3	InChI=1S/C12H16N2O3/c1-3-13-11(15)9(2)17-12(16)14-10-7-5-4-6-8-10/h4-9H,3H2,1-2H3,(H,13,15)(H,14,16)/t9-/m0/s1	8758.19	4.43099	4.79309	4.59104
Training	M871	16219-75-3	InChI=1S/C9H12/c1-2-8-5-7-3-4-9(8)6-7/h2-4,7,9H,5-6H2,1H3/b8-2+	41205.7	3.46492	4.177	3.56492
Test	M872	16606-64-7	InChI=1S/C3H10NO3P/c1-2-3(4)8(5,6)7/h3H,2,4H2,1H3,(H2,5,6,7)/t3-/m1/s1	3865.17	4.55613	4.62649	4.43487
Training	M873	16672-87-0	InChI=1S/C2H6ClO3P/c3-1-2-7(4,5)6/h1-2H2,(H2,4,5,6)	103885	3.1433	3.19862	3.2433
Training	M874	16752-77-5	InChI=1S/C5H10N2O2S/c1-4(10-3)7-9-5(8)6-2/h1-3H3,(H,6,8)/b7-4+	35586.6	3.65879	4.04224	3.55879
Test	M875	17606-31-4	InChI=1S/C17H21NO4S4/c1-18(2)15(13-23-25(19,20)16-9-5-3-6-10-16)14-24-26(21,22)17-11-7-4-8-12-17/h3-12,15H,13-14H2,1-2H3	4957.67	4.93982	5.52487	6.11257
Training	M876	17804-35-2	InChI=1S/C14H18N4O3/c1-3-4-9-15-13(19)18-11-8-6-5-7-10(11)16-12(18)17-14(20)21-2/h5-8H,3-4,9H2,1-2H3,(H,15,19)(H,16,17,20)	13452.7	4.33406	6.47206	5.48087
Training	M877	18181-70-9	InChI=1S/C8H8Cl2IO3PS/c1-12-15(16,13-2)14-8-4-5(9)7(11)3-6(8)10/h3-4H,1-2H3	1763.99	5.36945	4.71699	5.15241
Training	M878	18181-80-1	InChI=1S/C17H16Br2O3/c1-11(2)22-16(20)17(21,12-3-7-14(18)8-4-12)13-5-9-15(19)10-6-13/h3-11,21H,1-2H3	1.65857	8.41183	8.40239	8.31183
Training	M879	18292-97-2	InChI=1S/C7H5N3O6/c1-4-5(8(11)12)2-3-6(9(13)14)7(4)10(15)16/h2-3H,1H3	90.1914	6.40111	5.33222	6.30111
Training	M880	18467-77-1	InChI=1S/C12H18O7/c1-10(2)15-5-6-7(17-10)8-12(16-6,9(13)14)19-11(3,4)18-8/h6-8H,5H2,1-4H3,(H,13,14)/t6-,7+,8-,12-/m0/s1	833.194	5.51743	4.38448	4.98623
Training	M881	18691-97-9	InChI=1S/C10H11N3OS/c1-11-9(14)13(2)10-12-7-5-3-4-6-8(7)15-10/h3-6H,1-2H3,(H,11,14)	8.06801e+06	1.43817	3.38043	2.1521
Training	M882	18962-05-5	InChI=1S/C10H12O2/c1-8(2)12-10-5-3-9(7-11)4-6-10/h3-8H,1-2H3	22706.9	3.85922	4.48934	3.93311
Training	M883	19044-88-3	InChI=1S/C12H18N4O6S/c1-3-5-14(6-4-2)12-10(15(17)18)7-9(23(13,21)22)8-11(12)16(19)20/h7-8H,3-6H2,1-2H3,(H2,13,21,22)	46190.4	3.87498	4.3812	4.63322
Training	M884	19406-51-0	InChI=1S/C7H7N3O4/c1-4-6(9(11)12)2-5(8)3-7(4)10(13)14/h2-3H,8H2,1H3	688.732	5.45674	4.33271	5.35674
Test	M885	19666-30-9	InChI=1S/C15H18Cl2N2O3/c1-8(2)21-12-7-11(9(16)6-10(12)17)19-14(20)22-13(18-19)15(3,4)5/h6-8H,1-5H3	9105.58	4.57879	3.80198	4.44483
Training	M886	19937-59-8	InChI=1S/C10H13ClN2O2/c1-13(2)10(14)12-7-4-5-9(15-3)8(11)6-7/h4-6H,1-3H3,(H,12,14)	1589.35	5.158	6.71985	6.71719
Training	M887	20354-26-1	InChI=1S/C9H6Cl2N2O3/c1-12-8(14)13(16-9(12)15)5-2-3-6(10)7(11)4-5/h2-4H,1H3	214398	3.08552	4.46115	3.64866
Training	M888	20830-75-5	InChI=1S/C41H64O14/c1-19-36(47)28(42)15-34(50-19)54-38-21(3)52-35(17-30(38)44)55-37-20(2)51-33(16-29(37)43)53-24-8-10-39(4)23(13-24)6-7-26-27(39)14-31(45)40(5)25(9-11-41(26,40)48)22-12-32(46)49-18-22/h12,19-21,23-31,33-38,42-45,47-48H,6-11,13-18H2,1-5H3/t19-,20-,21-,23+,24+,25+,26-,27-,28+,29+,30-,31-,33+,34+,35-,36-,37+,38+,39+,40+,41-/m0/s1	3888.81	5.3028	4.18704	4.23329
Test	M889	21087-64-9	InChI=1S/C8H14N4OS/c1-8(2,3)5-6(13)12(9)7(14-4)11-10-5/h9H2,1-4H3	6643.11	4.50863	5.0186	3.10605
Training	M890	21725-46-2	InChI=1S/C9H13ClN6/c1-4-12-7-13-6(10)14-8(15-7)16-9(2,3)5-11/h4H2,1-3H3,(H2,12,13,14,15,16)	26114.9	3.96457	4.57095	3.86457
Training	M891	22071-15-4	InChI=1S/C16H14O3/c1-11(16(18)19)13-8-5-9-14(10-13)15(17)12-6-3-2-4-7-12/h2-11H,1H3,(H,18,19)/t11-/m0/s1	51766.2	3.69127	4.38154	3.59127
Test	M892	22204-53-1	InChI=1S/C14H14O3/c1-9(14(15)16)10-3-4-12-8-13(17-2)6-5-11(12)7-10/h3-9H,1-2H3,(H,15,16)/t9-/m0/s1	57954	3.59913	4.436	3.62386
Training	M893	22224-92-6	InChI=1S/C13H22NO3PS/c1-6-16-18(15,14-10(2)3)17-12-7-8-13(19-5)11(4)9-12/h7-10H,6H2,1-5H3,(H,14,15)/t18-/m1/s1	229238	3.12167	4.3991	3.27462
Training	M894	22259-30-9	InChI=1S/C11H15N3O2/c1-12-11(15)16-10-6-4-5-9(7-10)13-8-14(2)3/h4-8H,1-3H3,(H,12,15)/b13-8+	1.20917	8.26241	6.76785	8.16241
Training	M895	22781-23-3	InChI=1S/C11H13NO4/c1-11(2)15-8-6-4-5-7(9(8)16-11)14-10(13)12-3/h4-6H,1-3H3,(H,12,13)	1.53113	8.16373	6.42387	7.06328
Training	M896	22936-75-0	InChI=1S/C11H21N5S/c1-6-12-9-14-10(13-8(4)7(2)3)16-11(15-9)17-5/h7-8H,6H2,1-5H3,(H2,12,13,14,15,16)/t8-/m0/s1	108.686	6.37102	4.2517	4.95308
Training	M897	23031-36-9	InChI=1S/C19H24O3/c1-7-8-13-12(4)16(10-15(13)20)22-18(21)17-14(9-11(2)3)19(17,5)6/h1,9,14,16-17H,8,10H2,2-6H3/t14-,16-,17-/m1/s1	1082.14	5.4434	5.25923	5.3434
Training	M898	23103-98-2	InChI=1S/C11H18N4O2/c1-7-8(2)12-10(14(3)4)13-9(7)17-11(16)15(5)6/h1-6H3	4.91815	7.6853	5.76481	6.99156
Training	M899	23184-66-9	InChI=1S/C17H26ClNO2/c1-4-7-11-21-13-19(16(20)12-18)17-14(5-2)9-8-10-15(17)6-3/h8-10H,4-7,11-13H2,1-3H3	501.585	5.7936	3.85339	4.07763
Test	M900	23560-59-0	InChI=1S/C9H12ClO4P/c1-12-15(11,13-2)14-9-7-5-3-4-6(7)8(9)10/h3-4,6-7H,5H2,1-2H3/t6-,7+/m1/s1	1928.76	5.11373	5.54286	5.44085
Training	M901	23564-05-8	InChI=1S/C12H14N4O4S2/c1-19-11(17)15-9(21)13-7-5-3-4-6-8(7)14-10(22)16-12(18)20-2/h3-6H,1-2H3,(H2,13,15,17,21)(H2,14,16,18,22)	3.00566	8.05659	5.03952	7.19828
Training	M902	23947-60-6	InChI=1S/C11H19N3O/c1-4-6-7-9-8(3)13-11(12-5-2)14-10(9)15/h4-7H2,1-3H3,(H2,12,13,14,15)	6540.36	4.50514	5.32955	4.40514
Training	M903	23950-58-5	InChI=1S/C12H11Cl2NO/c1-4-12(2,3)15-11(16)8-5-9(13)7-10(14)6-8/h1,5-7H,2-3H3,(H,15,16)	61190.3	3.62177	4.05978	3.72177
Test	M904	24017-47-8	InChI=1S/C12H16N3O3PS/c1-3-16-19(20,17-4-2)18-12-13-10-15(14-12)11-8-6-5-7-9-11/h5-10H,3-4H2,1-2H3	6850.3	4.66027	5.26901	4.5275
Training	M905	24151-93-7	InChI=1S/C14H28NO3PS2/c1-4-10-17-19(20,18-11-5-2)21-12-14(16)15-9-7-6-8-13(15)3/h13H,4-12H2,1-3H3/t13-/m0/s1	2.93333	8.08101	6.8934	8.52427
Training	M906	24579-73-5	InChI=1S/C9H20N2O2/c1-4-8-13-9(12)10-6-5-7-11(2)3/h4-8H2,1-3H3,(H,10,12)	1.75761	8.02985	6.80523	7.92985
Training	M907	24800-44-0	InChI=1S/C9H20O4/c1-7(11)5-12-9(3)6-13-8(2)4-10/h7-11H,4-6H2,1-3H3/t7-,8+,9+/m0/s1	108244	3.24947	3.66325	3.34947
Training	M908	25057-89-0	InChI=1S/C10H12N2O3S/c1-7(2)12-10(13)8-5-3-4-6-9(8)11-16(12,14)15/h3-7,11H,1-2H3	1.24981e+06	2.28387	2.49493	2.38387
Training	M909	25059-80-7	InChI=1S/C11H10ClNO3S/c1-2-16-9(14)6-13-10-7(12)4-3-5-8(10)17-11(13)15/h3-5H,2,6H2,1H3	141357	3.28381	3.70486	3.38381
Training	M910	25154-52-3	InChI=1S/C15H24O/c1-2-3-4-5-6-7-8-9-14-10-12-15(16)13-11-14/h10-13,16H,2-9H2,1H3	5027.86	4.64173	4.52255	4.0434
Training	M911	25167-83-3	InChI=1S/C6H2Cl4O/c7-2-1-3(8)6(11)5(10)4(2)9/h1,11H	109.447	6.32608	5.29862	6.22608
Training	M912	25265-77-4	InChI=1S/C12H24O3/c1-8(2)10(13)12(5,6)7-15-11(14)9(3)4/h8-10,13H,7H2,1-6H3/t10-/m1/s1	378.733	5.75676	4.58963	5.65676
Test	M913	25311-71-1	InChI=1S/C15H24NO4PS/c1-6-18-21(22,16-11(2)3)20-14-10-8-7-9-13(14)15(17)19-12(4)5/h7-12H,6H2,1-5H3,(H,16,22)/t21-/m1/s1	151687	3.35737	4.24397	3.85453
Training	M914	25319-90-8	InChI=1S/C11H13ClO2S/c1-3-15-11(13)7-14-10-5-4-9(12)6-8(10)2/h4-6H,3,7H2,1-2H3	3.5665	7.83646	6.83319	7.73646
Test	M915	25321-09-9	InChI=1S/C12H18/c1-9(2)11-7-5-6-8-12(11)10(3)4/h5-10H,1-4H3	384.563	5.62527	5.31647	4.80549
Test	M916	25875-51-8	InChI=1S/C15H13Cl2N5/c16-13-5-1-11(2-6-13)9-19-21-15(18)22-20-10-12-3-7-14(17)8-4-12/h1-10H,(H3,18,21,22)/b19-9-,20-10+	803.218	5.61918	5.74459	5.42683
Training	M917	26002-80-2	InChI=1S/C23H26O3/c1-16(2)13-20-21(23(20,3)4)22(24)25-15-17-9-8-12-19(14-17)26-18-10-6-5-7-11-18/h5-14,20-21H,15H2,1-4H3/t20-,21+/m0/s1	78.6463	6.64895	5.69929	6.53928
Training	M918	26087-47-8	InChI=1S/C13H21O3PS/c1-11(2)15-17(14,16-12(3)4)18-10-13-8-6-5-7-9-13/h5-9,11-12H,10H2,1-4H3	3.53794	7.91116	6.86488	8.04263
Test	M919	26225-79-6	InChI=1S/C13H18O5S/c1-5-16-12-13(2,3)10-8-9(18-19(4,14)15)6-7-11(10)17-12/h6-8,12H,5H2,1-4H3/t12-/m0/s1	198.613	6.15888	6.4844	7.91655
Training	M920	26444-49-5	InChI=1S/C19H17O4P/c1-16-10-8-9-15-19(16)23-24(20,21-17-11-4-2-5-12-17)22-18-13-6-3-7-14-18/h2-15H,1H3	19617.6	4.23923	5.01479	4.33923
Training	M921	26471-62-5	InChI=1S/C9H6N2O2/c1-7-2-3-8(10-5-12)4-9(7)11-6-13/h2-4H,1H3	665.285	5.41793	7.24072	5.61394
Training	M922	26530-20-1	InChI=1S/C11H19NOS/c1-2-3-4-5-6-7-9-12-11(13)8-10-14-12/h8,10H,2-7,9H2,1H3	15312.4	4.14403	4.54287	4.04403
Training	M923	26644-46-2	InChI=1S/C10H14Cl6N4O2/c11-9(12,13)7(17-5-21)19-1-2-20(4-3-19)8(18-6-22)10(14,15)16/h5-8H,1-4H2,(H,17,21)(H,18,22)/t7-,8+	366.988	6.0738	4.50514	5.57469
Training	M924	27203-92-5	InChI=1S/C16H25NO2/c1-17(2)12-14-7-4-5-10-16(14,18)13-8-6-9-15(11-13)19-3/h6,8-9,11,14,18H,4-5,7,10,12H2,1-3H3/t14-,16+/m0/s1	42991.4	3.78719	5.85195	4.62545
Test	M925	27304-13-8	InChI=1S/C10H4Cl8O/c11-3-1-2(6-9(3,16)19-6)8(15)5(13)4(12)7(1,14)10(8,17)18/h1-3,6H/t1-,2-,3+,6+,7-,8+,9-/m1/s1	117455	3.55725	3.93031	3.90073
Training	M926	27314-13-2	InChI=1S/C12H9ClF3N3O/c1-17-9-6-18-19(11(20)10(9)13)8-4-2-3-7(5-8)12(14,15)16/h2-6,17H,1H3	931.58	5.51318	6.29474	6.7039
Training	M927	27355-22-2	InChI=1S/C8H2Cl4O2/c9-4-2-1-14-8(13)3(2)5(10)7(12)6(4)11/h1H2	13431.4	4.30631	5.14466	4.40631
Training	M928	28108-99-8	InChI=1S/C21H21O4P/c1-17(2)18-10-9-15-21(16-18)25-26(22,23-19-11-5-3-6-12-19)24-20-13-7-4-8-14-20/h3-17H,1-2H3	54188.6	3.83237	5.30555	4.47623
Training	M929	28159-98-0	InChI=1S/C11H19N5S/c1-11(2,3)16-9-13-8(12-7-5-6-7)14-10(15-9)17-4/h7H,5-6H2,1-4H3,(H2,12,13,14,15,16)	171.955	6.16834	7.85952	6.26834
Training	M930	28249-77-6	InChI=1S/C12H16ClNOS/c1-3-14(4-2)12(15)16-9-10-5-7-11(13)8-6-10/h5-8H,3-4,9H2,1-2H3	5392.31	4.67947	5.05247	4.77458
Training	M931	28434-01-7	InChI=1S/C22H26O3/c1-15(2)10-19-20(22(19,3)4)21(23)25-14-17-12-18(24-13-17)11-16-8-6-5-7-9-16/h5-10,12-13,19-20H,11,14H2,1-4H3/t19-,20-/m0/s1	4332.58	4.89274	5.6146	4.81768
Training	M932	28772-56-7	InChI=1S/C30H23BrO4/c31-23-16-14-20(15-17-23)19-10-12-22(13-11-19)26(32)18-25(21-6-2-1-3-7-21)28-29(33)24-8-4-5-9-27(24)35-30(28)34/h1-17,25-26,32-33H,18H2/t25-,26-/m0/s1	1.24667	8.62639	6.39748	7.86128
Training	M933	29091-21-2	InChI=1S/C13H17F3N4O4/c1-3-5-18(6-4-2)11-9(19(21)22)7-8(13(14,15)16)10(17)12(11)20(23)24/h7H,3-6,17H2,1-2H3	1328.37	5.42111	7.22636	5.32111
Test	M934	29122-68-7	InChI=1S/C14H22N2O3/c1-10(2)16-8-12(17)9-19-13-5-3-11(4-6-13)7-14(15)18/h3-6,10,12,16-17H,7-9H2,1-2H3,(H2,15,18)/t12-/m0/s1	500.292	5.72621	5.56503	6.19591
Training	M935	29171-20-8	InChI=1S/C10H16O/c1-5-10(4,11)8-6-7-9(2)3/h1,7,11H,6,8H2,2-4H3/t10-/m0/s1	146611	3.01634	3.01933	2.91634
Training	M936	29232-93-7	InChI=1S/C11H20N3O3PS/c1-6-14(7-2)11-12-9(3)8-10(13-11)17-18(19,15-4)16-5/h8H,6-7H2,1-5H3	90456.9	3.52833	4.1662	3.62833
Training	M937	29385-43-1	InChI=1S/C7H7N3/c1-5-3-2-4-6-7(5)9-10-8-6/h2-4H,1H3,(H,8,9,10)	0.0944847	9.14898	6.49808	8.76988
Training	M938	29560-84-7	InChI=1S/C3H5ClO/c4-2-1-3-5/h1-2,5H,3H2/b2-1-	114656	2.90686	3.38636	3.39179
Training	M939	29590-42-9	InChI=1S/C11H20O2/c1-4-11(12)13-9-7-5-6-8-10(2)3/h4,10H,1,5-9H2,2-3H3	4580.78	4.60453	3.07806	3.54658
Training	M940	29973-13-5	InChI=1S/C11H15NO2S/c1-3-15-8-9-6-4-5-7-10(9)14-11(13)12-2/h4-7H,3,8H2,1-2H3,(H,12,13)	941.452	5.37898	5.07675	5.27898
Training	M941	30125-63-4	InChI=1S/C7H12ClN5/c1-7(2,3)13-6-11-4(8)10-5(9)12-6/h1-3H3,(H3,9,10,11,12,13)	196.907	6.01035	4.87438	4.8206
Training	M942	30125-65-6	InChI=1S/C8H15N5S/c1-8(2,3)13-6-10-5(9)11-7(12-6)14-4/h1-4H3,(H3,9,10,11,12,13)	44425.6	3.68136	3.98312	3.78136
Training	M943	30560-19-1	InChI=1S/C4H10NO3PS/c1-4(6)5-9(7,8-2)10-3/h1-3H3,(H,5,6,7)/t9-/m1/s1	9445.84	4.2876	4.73121	4.27777
Training	M944	30777-19-6	InChI=1S/C17H12/c1-2-6-13-11-17-15(9-12(13)5-1)10-14-7-3-4-8-16(14)17/h1-9,11H,10H2	79347.8	3.43548	4.01959	3.82695
Training	M945	30899-19-5	InChI=1S/C5H12O/c1-3-4-5(2)6/h5-6H,3-4H2,1-2H3/t5-/m0/s1	911.361	4.98552	6.09709	5.31821
Training	M946	31218-83-4	InChI=1S/C10H20NO4PS/c1-6-11-16(17,13-5)15-9(4)7-10(12)14-8(2)3/h7-8H,6H2,1-5H3,(H,11,17)/b9-7+/t16-/m1/s1	2.2786e+06	2.09152	2.8665	2.19152
Training	M947	31329-57-4	InChI=1S/C24H33NO3/c1-3-25(4-2)14-16-28-24(26)21(18-22-12-8-15-27-22)17-20-11-7-10-19-9-5-6-13-23(19)20/h5-7,9-11,13,21-22H,3-4,8,12,14-18H2,1-2H3/t21-,22-/m0/s1	15.8695	7.38323	5.92759	7.02235
Training	M948	31895-21-3	InChI=1S/C5H11NS3/c1-6(2)5-3-7-9-8-4-5/h5H,3-4H2,1-2H3	9456.68	4.28276	6.50608	4.60813
Test	M949	31972-43-7	InChI=1S/C13H22NO4PS/c1-6-17-19(15,14-10(2)3)18-12-7-8-13(20(5)16)11(4)9-12/h7-10H,6H2,1-5H3,(H,14,15)/t19-,20-/m1/s1	3539.74	4.9553	5.42226	5.96277
Training	M950	31972-44-8	InChI=1S/C13H22NO5PS/c1-6-18-20(15,14-10(2)3)19-12-7-8-13(11(4)9-12)21(5,16)17/h7-10H,6H2,1-5H3,(H,14,15)/t20-/m1/s1	15.7515	7.32819	5.05693	6.52096
Training	M951	33089-61-1	InChI=1S/C19H23N3/c1-14-6-8-18(16(3)10-14)20-12-22(5)13-21-19-9-7-15(2)11-17(19)4/h6-13H,1-5H3/b20-12+,21-13+	3.06218	7.98144	5.06729	6.86737
Training	M952	33213-65-9	InChI=1S/C9H6Cl6O3S/c10-5-6(11)8(13)4-2-18-19(16)17-1-3(4)7(5,12)9(8,14)15/h3-4H,1-2H2/t3-,4-,7-,8+,19-/m0/s1	48.5415	6.9234	5.95551	6.8234
Training	M953	33629-47-9	InChI=1S/C14H21N3O4/c1-6-9(2)15-13-11(16(18)19)7-10(14(3,4)5)8-12(13)17(20)21/h7-9,15H,6H2,1-5H3/t9-/m0/s1	751.172	5.59457	5.66826	5.76262
Test	M954	33693-04-8	InChI=1S/C10H19N5O/c1-6-11-7-12-8(15-10(2,3)4)14-9(13-7)16-5/h6H2,1-5H3,(H2,11,12,13,14,15)	91.5401	6.39113	6.3857	6.58097
Test	M955	33813-20-6	InChI=1S/C4H4N2S3/c7-4-6-2-1-5-3(6)8-9-4/h1-2H2	31298.7	3.75068	4.53988	3.67823
Training	M956	33820-53-0	InChI=1S/C15H23N3O4/c1-5-7-16(8-6-2)15-13(17(19)20)9-12(11(3)4)10-14(15)18(21)22/h9-11H,5-8H2,1-4H3	368.531	5.92399	5.49806	5.82399
Training	M957	33956-49-9	InChI=1S/C12H22O/c1-2-3-4-5-6-7-8-9-10-11-12-13/h2-5,13H,6-12H2,1H3/b3-2+,5-4+	12.9643	7.14804	6.14807	7.00812
Training	M958	34014-18-1	InChI=1S/C9H16N4OS/c1-9(2,3)6-11-12-8(15-6)13(5)7(14)10-4/h1-5H3,(H,10,14)	3506.71	4.81363	4.65545	4.71363
Test	M959	34123-57-4	InChI=1S/C11H16N2O/c1-8(2)9-4-6-10(7-5-9)13-11(14)12-3/h4-8H,1-3H3,(H2,12,13,14)	189467	3.00635	5.01676	4.23211
Training	M960	34123-59-6	InChI=1S/C12H18N2O/c1-9(2)10-5-7-11(8-6-10)13-12(15)14(3)4/h5-9H,1-4H3,(H,13,15)	17167.3	4.07976	4.59833	4.59716
Training	M961	34256-82-1	InChI=1S/C14H20ClNO2/c1-4-12-8-6-7-11(3)14(12)16(10-18-5-2)13(17)9-15/h6-8H,4-5,9-10H2,1-3H3	758.492	5.55104	4.65756	5.229
Training	M962	34590-94-8	InChI=1S/C7H16O3/c1-6(8)4-10-5-7(2)9-3/h6-8H,4-5H2,1-3H3/t6-,7-/m1/s1	4834.39	4.48651	5.02628	4.39784
Training	M963	34622-58-7	InChI=1S/C12H16ClNOS/c1-3-14(4-2)12(15)16-9-10-7-5-6-8-11(10)13/h5-8H,3-4,9H2,1-2H3	3.33792e+06	1.88777	2.56781	1.98777
Training	M964	34643-46-4	InChI=1S/C11H15Cl2O2PS2/c1-3-7-18-16(17,14-4-2)15-11-6-5-9(12)8-10(11)13/h5-6,8H,3-4,7H2,1-2H3/t16-/m0/s1	3857.19	4.95186	5.30512	5.05186
Training	M965	34681-10-2	InChI=1S/C7H14N2O2S/c1-5(6(2)12-4)9-11-7(10)8-3/h6H,1-4H3,(H,8,10)/b9-5-/t6-/m1/s1	7.71534	7.392	8.16587	7.492
Test	M966	34681-23-7	InChI=1S/C7H14N2O4S/c1-5(6(2)14(4,11)12)9-13-7(10)8-3/h6H,1-4H3,(H,8,10)/b9-5+/t6-/m0/s1	3738.19	4.7742	4.09376	3.67671
Training	M967	35367-38-5	InChI=1S/C14H9ClF2N2O2/c15-8-4-6-9(7-5-8)18-14(21)19-13(20)12-10(16)2-1-3-11(12)17/h1-7H,(H2,18,19,20,21)	698.912	5.6479	3.76876	4.33249
Training	M968	35554-44-0	InChI=1S/C14H14Cl2N2O/c1-2-7-19-14(9-18-6-5-17-10-18)12-4-3-11(15)8-13(12)16/h2-6,8,10,14H,1,7,9H2/t14-/m1/s1	0.764961	8.58938	8.02254	8.47849
Training	M969	35572-78-2	InChI=1S/C7H7N3O4/c1-4-6(8)2-5(9(11)12)3-7(4)10(13)14/h2-3H,8H2,1H3	2321.89	4.92895	5.14548	4.83725
Training	M970	35575-96-3	InChI=1S/C9H10ClN2O5PS/c1-15-18(14,16-2)19-5-12-8-7(17-9(12)13)3-6(10)4-11-8/h3-4H,5H2,1-2H3	7410.93	4.64158	4.10152	4.74158
Training	M971	35694-08-7	InChI=1S/C12H2Cl8/c13-5-1-3(7(15)11(19)9(5)17)4-2-6(14)10(18)12(20)8(4)16/h1-2H	1.32939e+06	2.50958	2.2283	2.47012
Training	M972	36734-19-7	InChI=1S/C13H13Cl2N3O3/c1-7(2)16-12(20)17-6-11(19)18(13(17)21)10-4-8(14)3-9(15)5-10/h3-5,7H,6H2,1-2H3,(H,16,20)	0.153649	9.3322	7.75716	8.65456
Training	M973	37350-58-6	InChI=1S/C15H25NO3/c1-12(2)16-10-14(17)11-19-15-6-4-13(5-7-15)8-9-18-3/h4-7,12,14,16-17H,8-11H2,1-3H3/t14-/m1/s1	342.809	5.89205	4.75679	4.91533
Training	M974	37764-25-3	InChI=1S/C8H11Cl2NO/c1-3-5-11(6-4-2)8(12)7(9)10/h3-4,7H,1-2,5-6H2	49732.3	3.6216	3.55649	3.56755
Training	M975	38260-54-7	InChI=1S/C10H17N2O4PS/c1-5-8-11-9(15-6-2)7-10(12-8)16-17(18,13-3)14-4/h7H,5-6H2,1-4H3	226153	3.11141	4.74589	3.94222
Test	M976	39196-18-4	InChI=1S/C9H18N2O2S/c1-9(2,3)7(6-14-5)11-13-8(12)10-4/h6H2,1-5H3,(H,10,12)/b11-7-	2.83826	7.88603	6.28265	7.95313
Training	M977	39515-40-7	InChI=1S/C24H25NO3/c1-16(2)13-20-22(24(20,3)4)23(26)28-21(15-25)17-9-8-12-19(14-17)27-18-10-6-5-7-11-18/h5-14,20-22H,1-4H3/t20-,21-,22+/m0/s1	533.138	5.84772	4.70111	4.3232
Training	M978	39515-41-8	InChI=1S/C22H23NO3/c1-21(2)19(22(21,3)4)20(24)26-18(14-23)15-9-8-12-17(13-15)25-16-10-6-5-7-11-16/h5-13,18-19H,1-4H3/t18-/m0/s1	0.400181	8.9411	6.83323	8.8411
Test	M979	39515-51-0	InChI=1S/C13H10O2/c14-10-11-5-4-8-13(9-11)15-12-6-2-1-3-7-12/h1-10H	0.300653	8.81908	6.59057	8.11208
Training	M980	39885-50-2	InChI=1S/C7H5ClF3N/c8-5-3-4(7(9,10)11)1-2-6(5)12/h1-3H,12H2	49.3322	6.59817	4.87348	5.17184
Training	M981	40020-01-7	InChI=1S/C10H7ClN2O/c11-9-6-8(14)10(13-12-9)7-4-2-1-3-5-7/h1-6H,(H,12,14)	2852.66	4.85994	4.3288	4.3615
Training	M982	40120-74-9	InChI=1S/C9H15Cl6O4P/c10-4-1-7(13)17-20(16,18-8(14)2-5-11)19-9(15)3-6-12/h7-9H,1-6H2/t7-,8-,9+/m0/s1	54429.3	3.89855	4.71085	3.91181
Test	M983	40596-69-8	InChI=1S/C19H34O3/c1-15(2)22-18(20)14-17(4)11-8-10-16(3)12-9-13-19(5,6)21-7/h8,11,14-16H,9-10,12-13H2,1-7H3/b11-8+,17-14+/t16-/m1/s1	309.028	6.00202	5.7303	6.54379
Training	M984	40843-25-2	InChI=1S/C15H12Cl2O4/c1-9(15(18)19)20-11-3-5-12(6-4-11)21-14-7-2-10(16)8-13(14)17/h2-9H,1H3,(H,18,19)/t9-/m0/s1	93.7837	6.54263	6.66313	6.44263
Training	M985	40843-73-0	InChI=1S/C12H8Cl2O2/c13-8-1-6-12(11(14)7-8)16-10-4-2-9(15)3-5-10/h1-7,15H	18803.3	4.13247	5.54526	4.23247
Test	M986	41096-46-2	InChI=1S/C17H30O2/c1-6-19-17(18)13-16(5)12-8-11-15(4)10-7-9-14(2)3/h8,12-15H,6-7,9-11H2,1-5H3/b12-8+,16-13+/t15-/m1/s1	543.079	5.6907	5.22274	4.89088
Test	M987	41198-08-7	InChI=1S/C11H15BrClO3PS/c1-3-7-18-17(14,15-4-2)16-11-6-5-9(12)8-10(11)13/h5-6,8H,3-4,7H2,1-2H3/t17-/m0/s1	182.315	6.31162	6.84256	6.05039
Training	M988	41394-05-2	InChI=1S/C10H10N4O/c1-7-12-13-9(10(15)14(7)11)8-5-3-2-4-6-8/h2-6H,11H2,1H3	270.605	5.87347	7.55921	7.3841
Training	M989	41483-43-6	InChI=1S/C13H24N4O3S/c1-6-8-9-11-10(3)15-13(14-7-2)16-12(11)20-21(18,19)17(4)5/h6-9H2,1-5H3,(H,14,15,16)	8917.93	4.55	3.75655	3.91289
Training	M990	41814-78-2	InChI=1S/C9H7N3S/c1-6-3-2-4-7-8(6)12-5-10-11-9(12)13-7/h2-5H,1H3	4365.81	4.63694	4.21583	4.23561
Training	M991	42399-41-7	InChI=1S/C22H26N2O4S/c1-15(25)28-20-21(16-9-11-17(27-4)12-10-16)29-19-8-6-5-7-18(19)24(22(20)26)14-13-23(2)3/h5-12,20-21H,13-14H2,1-4H3/t20-,21-/m1/s1	74476	3.74553	5.22706	3.84553
Training	M992	42576-02-3	InChI=1S/C14H9Cl2NO5/c1-21-14(18)10-7-9(3-4-12(10)17(19)20)22-13-5-2-8(15)6-11(13)16/h2-7H,1H3	23110.4	4.17039	5.09077	4.27039
Training	M993	42588-37-4	InChI=1S/C18H28O2/c1-6-13-20-18(19)14-17(5)12-8-11-16(4)10-7-9-15(2)3/h1,8,12,14-16H,7,9-11,13H2,2-5H3/b12-8+,17-14+/t16-/m0/s1	533.226	5.71465	5.97684	5.78769
Training	M994	42874-03-3	InChI=1S/C15H11ClF3NO4/c1-2-23-14-8-10(4-5-12(14)20(21)22)24-13-6-3-9(7-11(13)16)15(17,18)19/h3-8H,2H2,1H3	130.855	6.44156	6.88837	6.34156
Training	M995	43121-43-3	InChI=1S/C14H16ClN3O2/c1-14(2,3)12(19)13(18-9-16-8-17-18)20-11-6-4-10(15)5-7-11/h4-9,13H,1-3H3/t13-/m0/s1	584.737	5.70102	6.4599	5.80102
Training	M996	46503-52-0	InChI=1S/C11H8Cl2N2O/c12-8-1-2-9(10(13)5-8)11(16)6-15-4-3-14-7-15/h1-5,7H,6H2	8015.59	4.50277	5.11111	4.60277
Training	M997	50471-44-8	InChI=1S/C12H9Cl2NO3/c1-3-12(2)10(16)15(11(17)18-12)9-5-7(13)4-8(14)6-9/h3-6H,1H2,2H3/t12-/m0/s1	15253.3	4.27317	4.51309	4.37317
Training	M998	50512-35-1	InChI=1S/C12H18O4S2/c1-7(2)15-10(13)9(11(14)16-8(3)4)12-17-5-6-18-12/h7-8H,5-6H2,1-4H3	3704.7	4.89424	4.98308	4.89432
Training	M999	50563-36-5	InChI=1S/C13H18ClNO2/c1-10-5-4-6-11(2)13(10)15(7-8-17-3)12(16)9-14/h4-6H,7-9H2,1-3H3	54600.5	3.6706	5.6926	5.13039
Training	M1000	50594-66-6	InChI=1S/C14H7ClF3NO5/c15-10-5-7(14(16,17)18)1-4-12(10)24-8-2-3-11(19(22)23)9(6-8)13(20)21/h1-6H,(H,20,21)	33939.7	4.02759	4.55951	3.92759
Test	M1001	50933-33-0	InChI=1S/C18H32O2/c1-3-4-5-6-7-8-9-10-11-12-13-14-15-16-17-20-18(2)19/h6-7,10-11H,3-5,8-9,12-17H2,1-2H3/b7-6+,11-10+	21712.5	4.11114	5.49146	4.65373
Training	M1002	51218-45-2	InChI=1S/C15H22ClNO2/c1-5-13-8-6-7-11(2)15(13)17(14(18)9-16)12(3)10-19-4/h6-8,12H,5,9-10H2,1-4H3/t12-/m1/s1	708.358	5.60275	6.74876	5.70275
Training	M1003	51218-49-6	InChI=1S/C17H26ClNO2/c1-4-11-21-12-10-19(16(20)13-18)17-14(5-2)8-7-9-15(17)6-3/h7-9H,4-6,10-13H2,1-3H3	22526.4	4.14125	4.96436	4.28349
Training	M1004	51235-04-2	InChI=1S/C12H20N4O2/c1-14(2)10-13-11(17)16(12(18)15(10)3)9-7-5-4-6-8-9/h9H,4-8H2,1-3H3	10518.2	4.38	5.14703	4.48
Training	M1005	51276-47-2	InChI=1S/C5H12NO4P/c1-11(9,10)3-2-4(6)5(7)8/h4H,2-3,6H2,1H3,(H,7,8)(H,9,10)/t4-/m0/s1	61018.7	3.47252	4.1633	3.57252
Training	M1006	51333-22-3	InChI=1S/C25H34O6/c1-23-8-7-16(27)11-15(23)5-6-17-18-12-21-25(20(29)14-26,31-10-4-3-9-30-21)24(18,2)13-19(28)22(17)23/h7-8,11,17-19,21-22,26,28H,3-6,9-10,12-14H2,1-2H3/t17-,18-,19-,21+,22-,23-,24+,25+/m1/s1	1.33111e+06	2.50979	2.55067	2.60979
Training	M1007	51338-27-3	InChI=1S/C16H14Cl2O4/c1-10(16(19)20-2)21-12-4-6-13(7-5-12)22-15-8-3-11(17)9-14(15)18/h3-10H,1-2H3/t10-/m0/s1	15849.4	4.33298	3.95415	4.23298
Training	M1008	51481-61-9	InChI=1S/C10H16N6S/c1-8-9(16-7-15-8)5-17-4-3-13-10(12-2)14-6-11/h7H,3-5H2,1-2H3,(H,15,16)(H2,12,13,14)	170.107	6.17126	5.8763	6.07126
Training	M1009	51630-58-1	InChI=1S/C25H22ClNO3/c1-17(2)24(18-11-13-20(26)14-12-18)25(28)30-23(16-27)19-7-6-10-22(15-19)29-21-8-4-3-5-9-21/h3-15,17,23-24H,1-2H3/t23-,24-/m1/s1	631833	2.82254	4.31391	3.44531
Training	M1010	51707-55-2	InChI=1S/C9H8N4OS/c14-9(11-8-6-15-13-12-8)10-7-4-2-1-3-5-7/h1-6H,(H2,10,11,14)	0.813428	8.4326	6.91265	8.5326
Test	M1011	52315-07-8	InChI=1S/C22H19Cl2NO3/c1-22(2)17(12-19(23)24)20(22)21(26)28-18(13-25)14-7-6-10-16(11-14)27-15-8-4-3-5-9-15/h3-12,17-18,20H,1-2H3/t17-,18+,20+/m0/s1	18901	4.34292	5.01849	4.26027
Training	M1012	52645-53-1	InChI=1S/C21H20Cl2O3/c1-21(2)17(12-18(22)23)19(21)20(24)25-13-14-7-6-10-16(11-14)26-15-8-4-3-5-9-15/h3-12,17,19H,13H2,1-2H3/t17-,19-/m1/s1	0.422966	8.96619	6.96154	8.89787
Training	M1013	52888-80-9	InChI=1S/C14H21NOS/c1-3-10-15(11-4-2)14(16)17-12-13-8-6-5-7-9-13/h5-9H,3-4,10-12H2,1-2H3	0.385478	8.81435	7.01949	8.71435
Training	M1014	52918-63-5	InChI=1S/C22H19Br2NO3/c1-22(2)17(12-19(23)24)20(22)21(26)28-18(13-25)14-7-6-10-16(11-14)27-15-8-4-3-5-9-15/h3-12,17-18,20H,1-2H3/t17-,18-,20+/m1/s1	1818.72	5.4437	5.2864	5.3101
Training	M1015	53112-28-0	InChI=1S/C12H13N3/c1-9-8-10(2)14-12(13-9)15-11-6-4-3-5-7-11/h3-8H,1-2H3,(H,13,14,15)	0.220866	8.95527	7.36677	8.85527
Training	M1016	53780-34-0	InChI=1S/C11H13F3N2O3S/c1-6-4-7(2)10(5-9(6)15-8(3)17)16-20(18,19)11(12,13)14/h4-5,16H,1-3H3,(H,15,17)	4516.15	4.837	4.88529	4.8232
Test	M1017	54406-48-3	InChI=1S/C18H26O2/c1-8-10-13(5)15(9-2)20-17(19)16-14(11-12(3)4)18(16,6)7/h2,10-11,14-16H,8H2,1,3-7H3/b13-10+/t14-,15-,16-/m0/s1	91084.9	3.47893	5.10602	4.34725
Training	M1018	54593-83-8	InChI=1S/C6H11Cl4O3PS/c1-3-11-14(15,12-4-2)13-5(7)6(8,9)10/h5H,3-4H2,1-2H3/t5-/m0/s1	24.4901	7.13735	6.169	7.03735
Training	M1019	54910-89-3	InChI=1S/C17H18F3NO/c1-21-12-11-16(13-5-3-2-4-6-13)22-15-9-7-14(8-10-15)17(18,19)20/h2-10,16,21H,11-12H2,1H3/t16-/m1/s1	0.37745	8.91356	7.7293	8.81356
Training	M1020	55179-31-2	InChI=1S/C20H23N3O2/c1-20(2,3)18(24)19(23-14-21-13-22-23)25-17-11-9-16(10-12-17)15-7-5-4-6-8-15/h4-14,18-19,24H,1-3H3/t18-,19-/m0/s1	894.464	5.5766	5.72865	5.4766
Training	M1021	55219-65-3	InChI=1S/C14H18ClN3O2/c1-14(2,3)12(19)13(18-9-16-8-17-18)20-11-6-4-10(15)5-7-11/h4-9,12-13,19H,1-3H3/t12-,13+/m0/s1	3909.46	4.87883	5.29966	4.77883
Training	M1022	55283-68-6	InChI=1S/C13H14F3N3O4/c1-4-17(7-8(2)3)12-10(18(20)21)5-9(13(14,15)16)6-11(12)19(22)23/h5-6H,2,4,7H2,1,3H3	57465.9	3.76338	4.39384	3.86338
Training	M1023	55285-14-8	InChI=1S/C20H32N2O3S/c1-6-8-13-22(14-9-7-2)26-21(5)19(23)24-17-12-10-11-16-15-20(3,4)25-18(16)17/h10-12H,6-9,13-15H2,1-5H3	416.784	5.96049	5.92263	6.06049
Training	M1024	55290-64-7	InChI=1S/C6H10O4S2/c1-5-6(2)12(9,10)4-3-11(5,7)8/h3-4H2,1-2H3	0.828828	8.40431	5.7435	7.14696
Training	M1025	55335-06-3	InChI=1S/C7H4Cl3NO3/c8-3-1-4(9)7(11-6(3)10)14-2-5(12)13/h1H,2H2,(H,12,13)	36469.5	3.84711	4.22206	3.94711
Training	M1026	55406-53-6	InChI=1S/C8H12INO2/c1-2-3-6-10-8(11)12-7-4-5-9/h2-3,6-7H2,1H3,(H,10,11)	145767	3.28519	4.57323	3.38519
Training	M1027	55512-33-9	InChI=1S/C19H23ClN2O2S/c1-2-3-4-5-6-10-13-25-19(23)24-16-14-17(20)21-22-18(16)15-11-8-7-9-12-15/h7-9,11-12,14H,2-6,10,13H2,1H3	53.9208	6.84679	5.48651	6.5194
Training	M1028	55814-41-0	InChI=1S/C17H19NO2/c1-12(2)20-15-9-6-8-14(11-15)18-17(19)16-10-5-4-7-13(16)3/h4-12H,1-3H3,(H,18,19)	589.974	5.65946	7.52089	5.75946
Training	M1029	55949-38-7	InChI=1S/C4H4N2O/c7-4-5-2-1-3-6-4/h1-3H,(H,5,6,7)	3567.54	4.4303	5.5332	4.80047
Training	M1030	56207-39-7	InChI=1S/C7H7N3O4/c1-4-5(9(11)12)2-3-6(7(4)8)10(13)14/h2-3H,8H2,1H3	2.15434e+06	1.96148	2.72939	2.78703
Training	M1031	56425-91-3	InChI=1S/C15H15F3N2O2/c1-10(2)14(21,12-7-19-9-20-8-12)11-3-5-13(6-4-11)22-15(16,17)18/h3-10,21H,1-2H3/t14-/m0/s1	3484.85	4.95237	4.30678	4.85237
Test	M1032	56539-66-3	InChI=1S/C6H14O2/c1-6(2,8-3)4-5-7/h7H,4-5H2,1-3H3	4465.29	4.42267	4.2283	4.15901
Training	M1033	56634-95-8	InChI=1S/C14H15Br2NO2/c1-2-3-4-5-6-13(18)19-14-11(15)7-10(9-17)8-12(14)16/h7-8H,2-6H2,1H3	3.29244e+06	2.07252	2.83043	2.17729
Training	M1034	56803-37-3	InChI=1S/C22H23O4P/c1-22(2,3)18-11-10-16-21(17-18)26-27(23,24-19-12-6-4-7-13-19)25-20-14-8-5-9-15-20/h4-17H,1-3H3	30.4667	7.09868	5.97435	6.99868
Training	M1035	57057-83-7	InChI=1S/C7H5Cl3O2/c1-12-7-4(11)2-3(8)5(9)6(7)10/h2,11H,1H3	178.461	6.10538	8.24476	6.20538
Training	M1036	57369-32-1	InChI=1S/C11H11NO/c13-10-5-4-8-2-1-3-9-6-7-12(10)11(8)9/h1-3H,4-7H2	484.797	5.55302	4.62966	5.51788
Training	M1037	57646-30-7	InChI=1S/C17H19NO4/c1-11-7-5-8-12(2)15(11)18(13(3)17(20)21-4)16(19)14-9-6-10-22-14/h5-10,13H,1-4H3/t13-/m1/s1	104383	3.46042	3.59684	3.48578
Test	M1038	57775-29-8	InChI=1S/C18H22N2O2/c1-12(2)19-10-13(21)11-22-17-9-5-8-16-18(17)14-6-3-4-7-15(14)20-16/h3-9,12-13,15,19,21H,10-11H2,1-2H3/t13-,15-/m0/s1	38617.2	3.88799	4.75595	4.99651
Test	M1039	57837-19-1	InChI=1S/C15H21NO4/c1-10-7-6-8-11(2)14(10)16(13(17)9-19-4)12(3)15(18)20-5/h6-8,12H,9H2,1-5H3/t12-/m1/s1	13902.2	4.30304	4.49634	3.94669
Training	M1040	57960-19-7	InChI=1S/C24H32O4/c1-3-4-5-6-7-8-9-10-11-12-17-21-22(26)19-15-13-14-16-20(19)23(27)24(21)28-18(2)25/h13-16H,3-12,17H2,1-2H3	49325.6	3.89183	4.16752	3.79183
Training	M1041	57960-31-3	InChI=1S/C22H30O3/c1-2-3-4-5-6-7-8-9-10-11-16-19-20(23)17-14-12-13-15-18(17)21(24)22(19)25/h12-15,25H,2-11,16H2,1H3	3.47363	7.99384	6.56268	6.53777
Training	M1042	57966-95-7	InChI=1S/C7H10N4O3/c1-3-9-7(13)10-6(12)5(4-8)11-14-2/h3H2,1-2H3,(H2,9,10,12,13)/b11-5-	7.52274	7.42068	6.02527	5.80344
Training	M1043	58138-08-2	InChI=1S/C10H7Cl5O/c11-7-1-6(2-8(12)3-7)9(5-16-9)4-10(13,14)15/h1-3H,4-5H2/t9-/m0/s1	1293.39	5.394	2.99615	4.05757
Training	M1044	58810-48-3	InChI=1S/C14H16ClNO3/c1-9-4-3-5-10(2)13(9)16(12(17)8-15)11-6-7-19-14(11)18/h3-5,11H,6-8H2,1-2H3/t11-/m0/s1	193.435	6.16331	6.0073	6.26331
Test	M1045	58842-20-9	InChI=1S/C5H8N2O2S/c8-7(9)4-5-6-2-1-3-10-5/h4,6H,1-3H2	26155.5	3.78708	4.47713	4.00098
Training	M1046	59467-70-8	InChI=1S/C18H13ClFN3/c1-11-21-9-13-10-22-18(14-4-2-3-5-16(14)20)15-8-12(19)6-7-17(15)23(11)13/h2-9H,10H2,1H3	67108.1	3.68613	4.31305	3.78613
Test	M1047	59669-26-0	InChI=1S/C10H18N4O4S3/c1-7(19-5)11-17-9(15)13(3)21-14(4)10(16)18-12-8(2)20-6/h1-6H3/b11-7-,12-8+	217.621	6.21188	5.6705	4.85634
Training	M1048	59756-60-4	InChI=1S/C19H14F3NO/c1-23-11-16(13-6-3-2-4-7-13)18(24)17(12-23)14-8-5-9-15(10-14)19(20,21)22/h2-12H,1H3	25.0841	7.11821	5.15826	5.89926
Training	M1049	59865-13-3	InChI=1S/C62H111N11O12/c1-25-27-28-40(15)52(75)51-56(79)65-43(26-2)58(81)67(18)33-48(74)68(19)44(29-34(3)4)55(78)66-49(38(11)12)61(84)69(20)45(30-35(5)6)54(77)63-41(16)53(76)64-42(17)57(80)70(21)46(31-36(7)8)59(82)71(22)47(32-37(9)10)60(83)72(23)50(39(13)14)62(85)73(51)24/h25,27,34-47,49-52,75H,26,28-33H2,1-24H3,(H,63,77)(H,64,76)(H,65,79)(H,66,78)/b27-25-/t40-,41+,42-,43-,44-,45-,46+,47-,49+,50-…	17894	4.82742	6.19881	5.39114
Test	M1050	60207-31-0	InChI=1S/C12H11Cl2N3O2/c13-9-1-2-10(11(14)5-9)12(18-3-4-19-12)6-17-8-15-7-16-17/h1-2,5,7-8H,3-4,6H2	5392.09	4.74557	4.2039	4.1618
Test	M1051	60207-90-1	InChI=1S/C15H17Cl2N3O2/c1-2-3-12-7-21-15(22-12,8-20-10-18-9-19-20)13-5-4-11(16)6-14(13)17/h4-6,9-10,12H,2-3,7-8H2,1H3/t12-,15-/m1/s1	98057	3.54283	4.05186	3.81839
Training	M1052	60348-60-9	InChI=1S/C12H5Br5O/c13-6-1-2-11(9(16)3-6)18-12-5-8(15)7(14)4-10(12)17/h1-5H	11756.8	4.68152	4.69997	4.61826
Training	M1053	61213-25-0	InChI=1S/C12H10Cl2F3NO/c13-5-7-6-18(11(19)10(7)14)9-3-1-2-8(4-9)12(15,16)17/h1-4,7,10H,5-6H2/t7-,10+/m0/s1	29.8469	7.01941	7.93705	6.91941
Test	M1054	61432-55-1	InChI=1S/C15H21NOS/c1-15(2,13-9-5-3-6-10-13)18-14(17)16-11-7-4-8-12-16/h3,5-6,9-10H,4,7-8,11-12H2,1-2H3	4303.96	4.78674	5.07302	4.68719
Training	M1055	61869-08-7	InChI=1S/C19H20FNO3/c20-15-4-2-14(3-5-15)16-7-8-21-10-19(16)22-11-13-1-6-17-18(9-13)24-12-23-17/h1-6,9,16,19,21H,7-8,10-12H2/t16-,19+/m0/s1	50017.8	3.81855	5.53116	4.35196
Training	M1056	62924-70-3	InChI=1S/C16H12ClF4N3O4/c1-2-22(8-10-11(17)4-3-5-12(10)18)15-13(23(25)26)6-9(16(19,20)21)7-14(15)24(27)28/h3-7H,2,8H2,1H3	3841.31	5.04056	4.52087	4.48898
Training	M1057	63284-71-9	InChI=1S/C17H12ClFN2O/c18-16-4-2-1-3-15(16)17(22,13-9-20-11-21-10-13)12-5-7-14(19)8-6-12/h1-11,22H/t17-/m0/s1	49.2563	6.80549	6.56875	6.90549
Training	M1058	63333-35-7	InChI=1S/C14H7Br3F3N3O4/c1-21(13-9(16)2-6(15)3-10(13)17)12-8(14(18,19)20)4-7(22(24)25)5-11(12)23(26)27/h2-5H,1H3	45905.2	4.10001	3.81391	4.00001
Training	M1059	63675-72-9	InChI=1S/C20H24N2O6/c1-11(2)10-28-20(24)17-13(4)21-12(3)16(19(23)27-5)18(17)14-8-6-7-9-15(14)22(25)26/h6-9,11,18,21H,10H2,1-5H3/t18-/m0/s1	3.36039	8.06291	7.82956	7.96291
Training	M1060	64628-44-0	InChI=1S/C15H10ClF3N2O3/c16-12-4-2-1-3-11(12)13(22)21-14(23)20-9-5-7-10(8-6-9)24-15(17,18)19/h1-8H,(H2,20,21,22,23)	30475.4	4.07078	5.93554	4.40365
Training	M1061	64902-72-3	InChI=1S/C12H12ClN5O4S/c1-7-14-10(17-12(15-7)22-2)16-11(19)18-23(20,21)9-6-4-3-5-8(9)13/h3-6H,1-2H3,(H2,14,15,16,17,18,19)	1.59587	8.35061	6.08734	7.03913
Training	M1062	65589-70-0	InChI=1S/C13H11N3/c14-10-3-1-8-5-9-2-4-11(15)7-13(9)16-12(8)6-10/h1-7H,14-15H2	216398	2.98541	4.02513	3.45978
Training	M1063	40596-69-8	InChI=1S/C19H34O3/c1-15(2)22-18(20)14-17(4)11-8-10-16(3)12-9-13-19(5,6)21-7/h8,11,14-16H,9-10,12-13H2,1-7H3/b11-8+,17-14+/t16-/m0/s1	148.376	6.32066	3.92667	4.61664
Training	M1064	65907-30-4	InChI=1S/C18H26N2O5S/c1-6-7-11-23-16(21)19(4)26-20(5)17(22)24-14-10-8-9-13-12-18(2,3)25-15(13)14/h8-10H,6-7,11-12H2,1-5H3	443.489	5.93572	6.7292	6.20748
Test	M1065	66215-27-8	InChI=1S/C6H10N6/c7-4-10-5(8)12-6(11-4)9-3-1-2-3/h3H,1-2H2,(H5,7,8,9,10,11,12)	136.45	6.08562	5.55723	5.06569
Training	M1066	66230-04-4	InChI=1S/C25H22ClNO3/c1-17(2)24(18-11-13-20(26)14-12-18)25(28)30-23(16-27)19-7-6-10-22(15-19)29-21-8-4-3-5-9-21/h3-15,17,23-24H,1-2H3/t23-,24-/m1/s1	135053	3.49264	2.43321	3.39264
Training	M1067	66246-88-6	InChI=1S/C13H15Cl2N3/c1-2-3-10(7-18-9-16-8-17-18)12-5-4-11(14)6-13(12)15/h4-6,8-10H,2-3,7H2,1H3/t10-/m1/s1	0.182733	9.19178	6.91265	8.5326
Training	M1068	66376-36-1	InChI=1S/C4H13NO7P2/c5-3-1-2-4(6,13(7,8)9)14(10,11)12/h6H,1-3,5H2,(H2,7,8,9)(H2,10,11,12)	5916.58	4.6243	5.213	4.7243
Training	M1069	66441-23-4	InChI=1S/C18H16ClNO5/c1-3-22-17(21)11(2)23-13-5-7-14(8-6-13)24-18-20-15-9-4-12(19)10-16(15)25-18/h4-11H,3H2,1-2H3/t11-/m1/s1	31951.8	4.05394	3.24476	3.95394
Training	M1070	66840-71-9	InChI=1S/C9H14N2O2S/c1-8-4-6-9(7-5-8)10-14(12,13)11(2)3/h4-7,10H,1-3H3	6811.61	4.49774	6.44247	5.33124
Training	M1071	66841-25-6	InChI=1S/C22H19Br4NO3/c1-21(2)17(19(23)22(24,25)26)18(21)20(28)30-16(12-27)13-7-6-10-15(11-13)29-14-8-4-3-5-9-14/h3-11,16-19H,1-2H3/t16-,17+,18+,19-/m0/s1	96204.7	3.83963	3.82656	3.73963
Training	M1072	67129-08-2	InChI=1S/C14H16ClN3O/c1-11-5-3-6-12(2)14(11)18(13(19)9-15)10-17-8-4-7-16-17/h3-8H,9-10H2,1-2H3	0.0158712	10.243	8.78192	9.35719
Training	M1073	67306-00-7	InChI=1S/C19H31N/c1-16(15-20-12-6-5-7-13-20)14-17-8-10-18(11-9-17)19(2,3)4/h8-11,16H,5-7,12-15H2,1-4H3/t16-/m1/s1	32489.9	3.92514	4.76097	4.02514
Training	M1074	67375-30-8	InChI=1S/C22H19Cl2NO3/c1-22(2)17(12-19(23)24)20(22)21(26)28-18(13-25)14-7-6-10-16(11-14)27-15-8-4-3-5-9-15/h3-12,17-18,20H,1-2H3/t17-,18-,20-/m0/s1	822.071	5.70449	6.4542	5.80449
Test	M1075	67564-91-4	InChI=1S/C20H33NO/c1-15(12-21-13-16(2)22-17(3)14-21)11-18-7-9-19(10-8-18)20(4,5)6/h7-10,15-17H,11-14H2,1-6H3/t15-,16-,17+/m0/s1	0.218701	9.14228	6.96154	8.89787
Training	M1076	67747-09-5	InChI=1S/C15H16Cl3N3O2/c1-2-4-20(15(22)21-5-3-19-10-21)6-7-23-14-12(17)8-11(16)9-13(14)18/h3,5,8-10H,2,4,6-7H2,1H3	2780.16	5.13189	6.59297	5.31752
Training	M1077	68049-83-2	InChI=1S/C15H13Cl2N3O2/c1-2-7-22-13-9-12(10(16)8-11(13)17)20-15(21)19-6-4-3-5-14(19)18-20/h1,8-9H,3-7H2	3860.76	4.94249	5.35588	5.04249
Training	M1078	68157-60-8	InChI=1S/C12H10ClN3O/c13-11-8-10(6-7-14-11)16-12(17)15-9-4-2-1-3-5-9/h1-8H,(H2,14,15,16,17)	27830.1	3.94938	5.59694	4.46093
Test	M1079	68359-37-5	InChI=1S/C22H18Cl2FNO3/c1-22(2)15(11-19(23)24)20(22)21(27)29-18(12-26)13-8-9-16(25)17(10-13)28-14-6-4-3-5-7-14/h3-11,15,18,20H,1-2H3/t15-,18+,20+/m1/s1	14027.4	4.4908	4.37348	4.49264
Training	M1080	68505-69-1	InChI=1S/C12H16O4S/c1-4-16-17(13,14)9-5-6-11-10(7-9)12(2,3)8-15-11/h5-7H,4,8H2,1-3H3	0.254771	9.00263	7.03315	8.90263
Training	M1081	69409-94-5	InChI=1S/C26H22ClF3N2O3/c1-16(2)24(32-22-12-11-18(14-21(22)27)26(28,29)30)25(33)35-23(15-31)17-7-6-10-20(13-17)34-19-8-4-3-5-9-19/h3-14,16,23-24,32H,1-2H3/t23-,24-/m0/s1	69457.2	3.85978	4.54359	3.7788
Training	M1082	69806-34-4	InChI=1S/C15H11ClF3NO4/c1-8(14(21)22)23-10-2-4-11(5-3-10)24-13-12(16)6-9(7-20-13)15(17,18)19/h2-8H,1H3,(H,21,22)/t8-/m0/s1	53.2215	6.83226	7.64204	7.47616
Training	M1083	70124-77-5	InChI=1S/C26H23F2NO4/c1-17(2)24(18-11-13-21(14-12-18)32-26(27)28)25(30)33-23(16-29)19-7-6-10-22(15-19)31-20-8-4-3-5-9-20/h3-15,17,23-24,26H,1-2H3/t23-,24+/m0/s1	120323	3.57427	5.46589	3.67427
Test	M1084	70343-06-5	InChI=1S/C7H7N3O4/c1-4-2-3-5(9(11)12)6(8)7(4)10(13)14/h2-3H,8H2,1H3	3.62451	7.73554	7.0583	8.49031
Training	M1085	71283-80-2	InChI=1S/C18H16ClNO5/c1-3-22-17(21)11(2)23-13-5-7-14(8-6-13)24-18-20-15-9-4-12(19)10-16(15)25-18/h4-11H,3H2,1-2H3/t11-/m1/s1	14863.9	4.38631	4.22489	4.33425
Test	M1086	71422-67-8	InChI=1S/C20H9Cl3F5N3O3/c21-10-5-9(30-19(33)31-17(32)15-13(24)2-1-3-14(15)25)6-11(22)16(10)34-18-12(23)4-8(7-29-18)20(26,27)28/h1-7H,(H2,30,31,32,33)	836.89	5.81025	6.21408	6.09022
Training	M1087	71626-11-4	InChI=1S/C20H23NO3/c1-14-9-8-10-15(2)19(14)21(16(3)20(23)24-4)18(22)13-17-11-6-5-7-12-17/h5-12,16H,13H2,1-4H3/t16-/m1/s1	0.546495	8.77483	7.48152	8.67483
Training	M1088	71662-11-8	InChI=1S/C13H16N4O6/c18-13-16(14-7-10-1-2-12(22-10)17(19)20)9-11(23-13)8-15-3-5-21-6-4-15/h1-2,7,11H,3-6,8-9H2/b14-7+/t11-/m1/s1	587.983	5.74157	5.41929	5.02201
Test	M1089	72178-02-0	InChI=1S/C15H10ClF3N2O6S/c1-28(25,26)20-14(22)10-7-9(3-4-12(10)21(23)24)27-13-5-2-8(6-11(13)16)15(17,18)19/h2-7H,1H3,(H,20,22)	137708	3.50327	4.01205	3.60774
Training	M1090	72459-58-6	InChI=1S/C10H6ClN5O/c11-7-1-2-8-9(5-7)16(17)14-10(13-8)15-4-3-12-6-15/h1-6H	186254	3.12372	5.74839	4.55688
Training	M1091	72490-01-8	InChI=1S/C17H19NO4/c1-2-20-17(19)18-12-13-21-14-8-10-16(11-9-14)22-15-6-4-3-5-7-15/h3-11H,2,12-13H2,1H3,(H,18,19)	8761.18	4.53649	4.55964	4.43649
Training	M1092	72619-32-0	InChI=1S/C9H10O3/c1-7(9(10)11)12-8-5-3-2-4-6-8/h2-7H,1H3,(H,10,11)	220.582	5.87699	5.42064	5.63423
Test	M1093	72850-64-7	InChI=1S/C12H7ClF3NO2S/c13-11-17-9(12(14,15)16)8(20-11)10(18)19-6-7-4-2-1-3-5-7/h1-5H,6H2	23812.1	4.13066	3.58945	3.08435
Training	M1094	72963-72-5	InChI=1S/C17H22N2O4/c1-6-7-18-9-13(20)19(16(18)22)10-23-15(21)14-12(8-11(2)3)17(14,4)5/h1,8,12,14H,7,9-10H2,2-5H3/t12-,14+/m0/s1	6234.69	4.70811	5.77571	5.10525
Test	M1095	73590-58-6	InChI=1S/C17H19N3O3S/c1-10-8-18-15(11(2)16(10)23-4)9-24(21)17-19-13-6-5-12(22-3)7-14(13)20-17/h5-8H,9H2,1-4H3,(H,19,20)	2095.47	5.21706	5.2019	4.5887
Training	M1096	74051-80-2	InChI=1S/C17H29NO3S/c1-5-8-14(18-21-6-2)17-15(19)10-13(11-16(17)20)9-12(4)22-7-3/h12-13,18H,5-11H2,1-4H3/b17-14-/t12-,13+/m1/s1	83431	3.59386	4.95002	3.69386
Test	M1097	74070-46-5	InChI=1S/C12H9ClN2O3/c13-11-10(18-8-4-2-1-3-5-8)7-6-9(12(11)14)15(16)17/h1-7H,14H2	1212.27	5.3391	5.76553	5.59272
Training	M1098	74115-24-5	InChI=1S/C14H8Cl2N4/c15-11-7-3-1-5-9(11)13-17-19-14(20-18-13)10-6-2-4-8-12(10)16/h1-8H	1374.48	5.34351	5.37817	5.24351
Training	M1099	74223-64-6	InChI=1S/C14H15N5O6S/c1-8-15-12(18-14(16-8)25-3)17-13(21)19-26(22,23)10-7-5-4-6-9(10)11(20)24-2/h4-7H,1-3H3,(H2,15,16,17,18,19,21)	13082.8	4.46464	4.02006	4.10304
Training	M1100	74553-29-0	InChI=1S/C7H4Br2O/c8-6-1-2-7(9)5(3-6)4-10/h1-4H	103804	3.40525	3.64252	3.31545
Training	M1101	74738-17-3	InChI=1S/C11H6Cl2N2/c12-10-3-1-2-8(11(10)13)9-6-15-5-7(9)4-14/h1-3,5-6,15H	4354.26	4.73599	5.29778	4.83599
Training	M1102	76578-12-6	InChI=1S/C17H13ClN2O4/c1-10(17(21)22)23-12-3-5-13(6-4-12)24-16-9-19-15-8-11(18)2-7-14(15)20-16/h2-10H,1H3,(H,21,22)/t10-/m1/s1	1890.35	5.26096	4.69685	4.9408
Training	M1103	76578-14-8	InChI=1S/C19H17ClN2O4/c1-3-24-19(23)12(2)25-14-5-7-15(8-6-14)26-18-11-21-17-10-13(20)4-9-16(17)22-18/h4-12H,3H2,1-2H3/t12-/m1/s1	62395.2	3.77633	5.40939	3.87633
Training	M1104	76674-21-0	InChI=1S/C16H13F2N3O/c17-13-7-5-12(6-8-13)16(22,9-21-11-19-10-20-21)14-3-1-2-4-15(14)18/h1-8,10-11,22H,9H2/t16-/m0/s1	1697.18	5.24926	6.34975	5.34926
Training	M1105	76703-62-3	InChI=1S/C23H19ClF3NO3/c1-22(2)17(12-19(24)23(25,26)27)20(22)21(29)31-18(13-28)14-7-6-10-16(11-14)30-15-8-4-3-5-9-15/h3-12,17-18,20H,1-2H3/b19-12-/t17-,18+,20-/m0/s1	100036	3.65291	3.48356	3.75291
Training	M1106	76738-62-0	InChI=1S/C15H20ClN3O/c1-15(2,3)14(20)13(19-10-17-9-18-19)8-11-4-6-12(16)7-5-11/h4-7,9-10,13-14,20H,8H2,1-3H3/t13-,14-/m0/s1	0.29389	8.99986	7.14069	8.99677
Test	M1107	76824-35-6	InChI=1S/C8H15N7O2S3/c9-6(15-20(12,16)17)1-2-18-3-5-4-19-8(13-5)14-7(10)11/h4H,1-3H2,(H2,9,15)(H2,12,16,17)(H4,10,11,13,14)	34319.7	3.99266	4.38817	4.68496
Test	M1108	77501-60-1	InChI=1S/C16H9ClF3NO7/c17-11-5-8(16(18,19)20)1-4-13(11)28-9-2-3-12(21(25)26)10(6-9)15(24)27-7-14(22)23/h1-6H,7H2,(H,22,23)	495008	2.92832	3.31026	4.29014
Training	M1109	77501-63-4	InChI=1S/C19H15ClF3NO7/c1-3-29-17(25)10(2)30-18(26)13-9-12(5-6-15(13)24(27)28)31-16-7-4-11(8-14(16)20)19(21,22)23/h4-10H,3H2,1-2H3/t10-/m0/s1	33007.9	4.14581	5.25224	4.04581
Training	M1110	77732-09-3	InChI=1S/C14H18N2O4/c1-10-5-4-6-11(2)13(10)16(12(17)9-19-3)15-7-8-20-14(15)18/h4-6H,7-9H2,1-3H3	2561.41	5.03604	6.46898	5.9757
Training	M1111	78587-05-0	InChI=1S/C17H21ClN2O2S/c1-11-15(12-7-9-13(18)10-8-12)23-17(22)20(11)16(21)19-14-5-3-2-4-6-14/h7-11,14-15H,2-6H2,1H3,(H,19,21)/t11-,15+/m1/s1	672021	2.72024	3.48409	2.82024
Training	M1112	79127-80-3	InChI=1S/C17H19NO4/c1-2-20-17(19)18-12-13-21-14-8-10-16(11-9-14)22-15-6-4-3-5-7-15/h3-11H,2,12-13H2,1H3,(H,18,19)	1024.73	5.46844	5.54432	5.36844
Test	M1113	79241-46-6	InChI=1S/C19H20F3NO4/c1-3-4-11-25-18(24)13(2)26-15-6-8-16(9-7-15)27-17-10-5-14(12-23-17)19(20,21)22/h5-10,12-13H,3-4,11H2,1-2H3/t13-/m0/s1	636.102	5.78008	5.3071	5.09487
Training	M1114	79277-27-3	InChI=1S/C12H13N5O6S2/c1-6-13-10(16-12(14-6)23-3)15-11(19)17-25(20,21)7-4-5-24-8(7)9(18)22-2/h4-5H,1-3H3,(H2,13,14,15,16,17,19)	1010.51	5.58361	6.22623	5.48361
Test	M1115	79538-32-2	InChI=1S/C17H14ClF7O2/c1-6-11(19)13(21)7(14(22)12(6)20)5-27-15(26)10-8(16(10,2)3)4-9(18)17(23,24)25/h4,8,10H,5H2,1-3H3/b9-4+/t8-,10+/m0/s1	508025	2.91605	3.81243	3.23554
Training	M1116	79622-59-6	InChI=1S/C13H4Cl2F6N4O4/c14-6-1-4(12(16,17)18)3-22-11(6)23-9-7(24(26)27)2-5(13(19,20)21)8(15)10(9)25(28)29/h1-3H,(H,22,23)	1974.4	5.3721	5.782	5.4721
Test	M1117	79983-71-4	InChI=1S/C14H17Cl2N3O/c1-2-3-6-14(20,8-19-10-17-9-18-19)12-5-4-11(15)7-13(12)16/h4-5,7,9-10,20H,2-3,6,8H2,1H3/t14-/m1/s1	148.629	6.32512	7.80267	7.84602
Training	M1118	80844-07-1	InChI=1S/C25H28O3/c1-4-27-22-15-13-21(14-16-22)25(2,3)19-26-18-20-9-8-12-24(17-20)28-23-10-6-5-7-11-23/h5-17H,4,18-19H2,1-3H3	3474.79	5.03482	4.03533	4.93482
Training	M1119	81334-34-1	InChI=1S/C13H15N3O3/c1-7(2)13(3)12(19)15-10(16-13)9-8(11(17)18)5-4-6-14-9/h4-7H,1-3H3,(H,17,18)(H,15,16,19)/t13-/m1/s1	0.832779	8.49657	6.71234	8.39657
Training	M1120	81335-37-7	InChI=1S/C17H17N3O3/c1-9(2)17(3)16(23)19-14(20-17)13-11(15(21)22)8-10-6-4-5-7-12(10)18-13/h4-9H,1-3H3,(H,21,22)(H,19,20,23)/t17-/m1/s1	119159	3.4171	3.77299	3.3171
Training	M1121	81335-77-5	InChI=1S/C15H19N3O3/c1-5-9-6-10(13(19)20)11(16-7-9)12-17-14(21)15(4,18-12)8(2)3/h6-8H,5H2,1-4H3,(H,19,20)(H,17,18,21)/t15-/m0/s1	260210	3.04607	4.41388	3.14607
Test	M1122	81405-85-8	InChI=1S/C16H20N2O3/c1-9(2)16(4)15(20)17-13(18-16)11-7-6-10(3)8-12(11)14(19)21-5/h6-9H,1-5H3,(H,17,18,20)/t16-/m0/s1	996586	2.46139	4.03861	3.35087
Training	M1123	81777-89-1	InChI=1S/C12H14ClNO2/c1-12(2)8-16-14(11(12)15)7-9-5-3-4-6-10(9)13/h3-6H,7-8H2,1-2H3	133008	3.25579	4.99285	3.31783
Training	M1124	82097-50-5	InChI=1S/C14H16ClN5O5S/c1-9-16-12(19-14(17-9)24-2)18-13(21)20-26(22,23)11-6-4-3-5-10(11)25-8-7-15/h3-6H,7-8H2,1-2H3,(H2,16,17,18,19,20,21)	21290	4.27586	4.24754	4.17586
Training	M1125	82558-50-7	InChI=1S/C18H24N2O4/c1-6-18(3,7-2)14-11-15(24-20-14)19-17(21)16-12(22-4)9-8-10-13(16)23-5/h8-11H,6-7H2,1-5H3,(H,19,21)	82721.1	3.60404	4.35384	3.702
Test	M1126	82560-54-1	InChI=1S/C20H30N2O5S/c1-7-25-17(23)11-12-22(14(2)3)28-21(6)19(24)26-16-10-8-9-15-13-20(4,5)27-18(15)16/h8-10,14H,7,11-13H2,1-6H3	1605.58	5.40771	6.03796	5.37032
Training	M1127	82657-04-3	InChI=1S/C23H22ClF3O2/c1-14-16(10-7-11-17(14)15-8-5-4-6-9-15)13-29-21(28)20-18(22(20,2)3)12-19(24)23(25,26)27/h4-12,18,20H,13H2,1-3H3/b19-12-/t18-,20+/m1/s1	10.3006	7.61334	5.4826	5.67342
Training	M1128	82692-44-2	InChI=1S/C22H20Cl2N2O3/c1-12-5-7-15(8-6-12)18(27)11-29-22-19(14(3)25-26(22)4)21(28)16-9-10-17(23)13(2)20(16)24/h5-10H,11H2,1-4H3	0.112197	9.58481	7.67734	8.82082
Training	M1129	83055-99-6	InChI=1S/C16H18N4O7S/c1-25-12-8-13(26-2)18-15(17-12)19-16(22)20-28(23,24)9-10-6-4-5-7-11(10)14(21)27-3/h4-8H,9H2,1-3H3,(H2,17,18,19,20,22)	364.432	6.05159	6.52983	6.25867
Test	M1130	83121-18-0	InChI=1S/C14H6Cl2F4N2O2/c15-5-4-8(12(20)10(16)11(5)19)21-14(24)22-13(23)9-6(17)2-1-3-7(9)18/h1-4H,(H2,21,22,23,24)	106792	3.55251	4.3042	3.73971
Training	M1131	83657-24-3	InChI=1S/C15H17Cl2N3O/c1-15(2,3)14(21)13(20-9-18-8-19-20)6-10-4-5-11(16)7-12(10)17/h4-9,14,21H,1-3H3/b13-6+/t14-/m1/s1	11180.5	4.46505	4.19505	4.40348
Training	M1132	83881-51-0	InChI=1S/C21H25ClN2O3/c22-19-8-6-18(7-9-19)21(17-4-2-1-3-5-17)24-12-10-23(11-13-24)14-15-27-16-20(25)26/h1-9,21H,10-16H2,(H,25,26)/t21-/m0/s1	8821.54	4.64428	4.63521	4.74428
Training	M1133	84087-01-4	InChI=1S/C10H5Cl2NO2/c11-6-3-5-1-2-7(12)8(10(14)15)9(5)13-4-6/h1-4H,(H,14,15)	205404	3.07131	4.86759	2.98965
Training	M1134	84332-86-5	InChI=1S/C13H11Cl2NO5/c1-3-20-11(18)13(2)10(17)16(12(19)21-13)9-5-7(14)4-8(15)6-9/h4-6H,3H2,1-2H3/t13-/m0/s1	40889.6	3.9097	4.24431	3.8097
Training	M1135	85721-33-1	InChI=1S/C17H18FN3O3/c18-13-7-11-14(8-15(13)20-5-3-19-4-6-20)21(10-1-2-10)9-12(16(11)22)17(23)24/h7-10,19H,1-6H2,(H,23,24)	1177.18	5.44943	4.79004	4.53887
Test	M1136	86209-51-0	InChI=1S/C15H12F4N4O7S/c1-28-11(24)7-4-2-3-5-8(7)31(26,27)23-15(25)22-14-20-9(29-12(16)17)6-10(21-14)30-13(18)19/h2-6,12-13H,1H3,(H2,20,21,22,23,25)	248768	3.27476	4.10255	4.02513
Training	M1137	86479-06-3	InChI=1S/C16H8Cl2F6N2O3/c17-7-4-6(5-8(18)12(7)29-16(23,24)14(21)22)25-15(28)26-13(27)11-9(19)2-1-3-10(11)20/h1-5,14H,(H2,25,26,27,28)	256006	3.25559	5.13174	3.35559
Training	M1138	86763-47-5	InChI=1S/C15H22ClNO2/c1-5-13-8-6-7-12(4)15(13)17(14(18)9-16)10-19-11(2)3/h6-8,11H,5,9-10H2,1-4H3	0.0615414	9.66384	6.72957	7.9341
Test	M1139	86811-58-7	InChI=1S/C20H10Cl2F5N3O3/c21-11-5-4-10(29-19(32)30-17(31)16-13(23)2-1-3-14(16)24)7-15(11)33-18-12(22)6-9(8-28-18)20(25,26)27/h1-8H,(H2,29,30,31,32)	18006.7	4.4489	5.21916	4.72128
Test	M1140	87237-48-7	InChI=1S/C19H19ClF3NO5/c1-3-26-8-9-27-18(25)12(2)28-14-4-6-15(7-5-14)29-17-16(20)10-13(11-24-17)19(21,22)23/h4-7,10-12H,3,8-9H2,1-2H3/t12-/m0/s1	0.514181	8.92618	7.05318	8.48305
Training	M1141	87392-12-9	InChI=1S/C15H22ClNO2/c1-5-13-8-6-7-11(2)15(13)17(14(18)9-16)12(3)10-19-4/h6-8,12H,5,9-10H2,1-4H3/t12-/m1/s1	3035.47	4.97078	6.29545	5.07078
Training	M1142	87674-68-8	InChI=1S/C12H18ClNO2S/c1-8-7-17-10(3)12(8)14(11(15)5-13)9(2)6-16-4/h7,9H,5-6H2,1-4H3/t9-/m1/s1	18075.7	4.18349	4.96436	4.28349
Training	M1143	87818-31-3	InChI=1S/C18H26O2/c1-13(2)18-10-9-17(4,20-18)16(11-18)19-12-15-8-6-5-7-14(15)3/h5-8,13,16H,9-12H2,1-4H3/t16-,17+,18-/m1/s1	15919	4.23647	4.63712	4.33647
Training	M1144	88283-41-4	InChI=1S/C14H12Cl2N2O/c1-19-18-14(7-10-3-2-6-17-9-10)12-5-4-11(15)8-13(12)16/h2-6,8-9H,7H2,1H3/b18-14-	7744.89	4.58105	5.63098	5.08812
Training	M1145	88349-88-6	InChI=1S/C11H8ClNO3/c12-8-3-4-9(16-6-10(14)15)11-7(8)2-1-5-13-11/h1-5H,6H2,(H,14,15)	2898.39	4.91376	5.19833	4.99309
Training	M1146	88485-37-4	InChI=1S/C12H11ClF3NO3/c13-9-3-1-8(2-4-9)11(12(14,15)16)17-20-7-10-18-5-6-19-10/h1-4,10H,5-7H2/b17-11+	130311	3.37592	3.67802	3.47592
Training	M1147	88671-89-0	InChI=1S/C15H17ClN4/c1-2-3-8-15(9-17,10-20-12-18-11-19-20)13-4-6-14(16)7-5-13/h4-7,11-12H,2-3,8,10H2,1H3/t15-/m1/s1	205.156	6.14848	5.35841	4.82398
Training	M1148	90717-03-6	InChI=1S/C11H8ClNO2/c1-6-4-7-2-3-8(12)9(11(14)15)10(7)13-5-6/h2-5H,1H3,(H,14,15)	13047.8	4.23011	4.79529	4.33011
Training	M1149	90982-32-4	InChI=1S/C15H15ClN4O6S/c1-3-26-13(21)9-6-4-5-7-10(9)27(23,24)20-15(22)19-14-17-11(16)8-12(18-14)25-2/h4-8H,3H2,1-2H3,(H2,17,18,19,20,22)	278307	3.17334	3.94952	3.27334
Training	M1150	91465-08-6	InChI=1S/C23H19ClF3NO3/c1-22(2)17(12-19(24)23(25,26)27)20(22)21(29)31-18(13-28)14-7-6-10-16(11-14)30-15-8-4-3-5-9-15/h3-12,17-18,20H,1-2H3/b19-12-/t17-,18+,20+/m1/s1	1.08444e+06	2.61786	4.65175	3.40929
Training	M1151	93697-74-6	InChI=1S/C14H18N6O7S/c1-5-27-12(21)8-7-15-20(2)11(8)28(23,24)19-14(22)18-13-16-9(25-3)6-10(17-13)26-4/h6-7H,5H2,1-4H3,(H2,16,17,18,19,22)	0.331626	9.09677	7.14069	8.99677
Training	M1152	94050-52-9	InChI=1S/C25H20ClF2N3O3/c26-18-10-8-17(9-11-18)23(16-6-7-16)31-34-14-15-4-12-19(13-5-15)29-25(33)30-24(32)22-20(27)2-1-3-21(22)28/h1-5,8-13,16H,6-7,14H2,(H2,29,30,32,33)/b31-23-	817400	2.77232	4.17234	3.17326
Training	M1153	94125-34-5	InChI=1S/C15H16F3N5O4S/c1-9-19-12(22-14(20-9)27-2)21-13(24)23-28(25,26)11-6-4-3-5-10(11)7-8-15(16,17)18/h3-6H,7-8H2,1-2H3,(H2,19,20,21,22,23,24)	0.208002	9.30454	6.58707	8.17193
Training	M1154	94361-06-5	InChI=1S/C15H18ClN3O/c1-11(12-2-3-12)15(20,8-19-10-17-9-18-19)13-4-6-14(16)7-5-13/h4-7,9-12,20H,2-3,8H2,1H3/t11-,15+/m0/s1	83488	3.54343	4.64784	4.26803
Training	M1155	94593-79-0	InChI=1S/C12H12N2O3/c13-8-11(10-4-2-1-3-5-10)14-17-9-12-15-6-7-16-12/h1-5,12H,6-7,9H2/b14-11+	20694.3	4.05008	3.80443	4.15008
Test	M1156	94593-91-6	InChI=1S/C15H19N5O7S/c1-24-8-9-27-10-6-4-5-7-11(10)28(22,23)20-13(21)16-12-17-14(25-2)19-15(18-12)26-3/h4-7H,8-9H2,1-3H3,(H2,16,17,18,19,20,21)	15131	4.43651	4.36759	3.46496
Training	M1157	95266-40-3	InChI=1S/C13H16O5/c1-2-18-13(17)8-5-9(14)11(10(15)6-8)12(16)7-3-4-7/h7-8,16H,2-6H2,1H3/t8-	1.52552e+06	2.21844	3.98943	2.80258
Test	M1158	95465-99-9	InChI=1S/C10H23O2PS2/c1-6-9(4)14-13(11,12-8-3)15-10(5)7-2/h9-10H,6-8H2,1-5H3/t9-,10+,13?	152205	3.24957	3.41042	3.59974
Training	M1159	95617-09-7	InChI=1S/C16H12ClNO5/c1-9(15(19)20)21-11-3-5-12(6-4-11)22-16-18-13-7-2-10(17)8-14(13)23-16/h2-9H,1H3,(H,19,20)/t9-/m1/s1	1.45021	8.36196	6.75096	8.26196
Training	M1160	95737-68-1	InChI=1S/C20H19NO3/c1-16(23-20-9-5-6-14-21-20)15-22-17-10-12-19(13-11-17)24-18-7-3-2-4-8-18/h2-14,16H,15H2,1H3/t16-/m1/s1	1213.36	5.42302	5.50462	4.75555
Test	M1161	96182-53-5	InChI=1S/C13H23N2O3PS/c1-7-16-19(20,17-10(2)3)18-11-8-14-12(15-9-11)13(4,5)6/h8-10H,7H2,1-6H3/t19-/m0/s1	396.269	5.90495	6.23289	5.21973
Training	M1162	96489-71-3	InChI=1S/C19H25ClN2OS/c1-18(2,3)14-9-7-13(8-10-14)12-24-15-11-21-22(19(4,5)6)17(23)16(15)20/h7-11H,12H2,1-6H3	0.0916998	9.59984	6.72974	9.06213
Training	M1163	96491-05-3	InChI=1S/C16H18ClNO2S/c1-11-5-4-6-12(2)16(11)18(15(19)9-17)10-14-13(20-3)7-8-21-14/h4-8H,9-10H2,1-3H3	0.88739	8.56221	7.31657	8.46221
Training	M1164	96525-23-4	InChI=1S/C18H14F3NO2/c1-22-17-14(12-8-5-9-13(10-12)18(19,20)21)15(23)16(24-17)11-6-3-2-4-7-11/h2-10,16,22H,1H3/t16-/m1/s1	102923	3.51033	5.26558	4.3577
Training	M1165	97780-06-8	InChI=1S/C15H18N6O6S/c1-4-27-15-19-12(16-2)17-13(20-15)18-14(23)21-28(24,25)10-8-6-5-7-9(10)11(22)26-3/h5-8H,4H2,1-3H3,(H3,16,17,18,19,20,21,23)	16007.2	4.4089	5.67854	5.21224
Training	M1166	97886-45-8	InChI=1S/C15H16F5NO2S2/c1-6(2)5-7-8(13(22)24-3)10(12(16)17)21-11(15(18,19)20)9(7)14(23)25-4/h6,12H,5H2,1-4H3	33255.2	4.08173	3.98493	3.67088
Training	M1167	71626-11-4	InChI=1S/C20H23NO3/c1-14-9-8-10-15(2)19(14)21(16(3)20(23)24-4)18(22)13-17-11-6-5-7-12-17/h5-12,16H,13H2,1-4H3/t16-/m1/s1	6120.31	4.72565	7.05936	6.35261
Training	M1168	98730-04-2	InChI=1S/C11H11Cl2NO2/c1-7-6-16-9-5-3-2-4-8(9)14(7)11(15)10(12)13/h2-5,7,10H,6H2,1H3/t7-/m0/s1	13589.3	4.28197	5.48535	4.68727
Training	M1169	98886-44-3	InChI=1S/C9H18NO3PS2/c1-4-8(3)16-14(12,13-5-2)10-6-7-15-9(10)11/h8H,4-7H2,1-3H3/t8-,14-/m1/s1	5228.69	4.73393	4.95203	4.63393
Training	M1170	98967-40-9	InChI=1S/C12H9F2N5O2S/c1-7-5-6-19-11(15-7)16-12(17-19)22(20,21)18-10-8(13)3-2-4-9(10)14/h2-6,18H,1H3	467.251	5.84273	5.5017	5.94273
Training	M1171	99105-77-8	InChI=1S/C14H13ClO5S/c1-21(19,20)8-5-6-9(10(15)7-8)14(18)13-11(16)3-2-4-12(13)17/h5-7,13H,2-4H2,1H3	256713	3.10744	4.08572	3.20744
Training	M1172	99387-89-0	InChI=1S/C15H15ClF3N3O/c1-2-7-23-9-14(22-6-5-20-10-22)21-13-4-3-11(16)8-12(13)15(17,18)19/h3-6,8,10H,2,7,9H2,1H3/b21-14+	210329	3.21586	4.48823	3.31586
Training	M1173	100646-51-3	InChI=1S/C19H17ClN2O4/c1-3-24-19(23)12(2)25-14-5-7-15(8-6-14)26-18-11-21-17-10-13(20)4-9-16(17)22-18/h4-12H,3H2,1-2H3/t12-/m1/s1	2275.11	5.21448	5.05786	5.03967
Training	M1174	100728-84-5	InChI=1S/C15H18N2O3/c1-8(2)15(4)14(20)16-12(17-15)11-7-9(3)5-6-10(11)13(18)19/h5-8H,1-4H3,(H,18,19)(H,16,17,20)/t15-/m1/s1	213.388	6.10908	5.66525	6.00908
Test	M1175	100784-20-1	InChI=1S/C13H15ClN6O7S/c1-20-10(8(9(14)18-20)11(21)27-4)28(23,24)19-13(22)17-12-15-6(25-2)5-7(16-12)26-3/h5H,1-4H3,(H2,15,16,17,19,22)	158508	3.43825	4.3226	3.02811
Training	M1176	101007-06-1	InChI=1S/C26H21F6NO5/c1-24(2)18(11-12-20(34)38-23(25(27,28)29)26(30,31)32)21(24)22(35)37-19(14-33)15-7-6-10-17(13-15)36-16-8-4-3-5-9-16/h3-13,18-19,21,23H,1-2H3/b12-11+/t18-,19-,21-/m1/s1	133239	3.60892	4.21156	3.70892
Training	M1177	101200-48-0	InChI=1S/C15H17N5O6S/c1-9-16-13(18-14(17-9)26-4)20(2)15(22)19-27(23,24)11-8-6-5-7-10(11)12(21)25-3/h5-8H,1-4H3,(H,19,22)	0.0160657	10.3911	7.76146	9.59282
Training	M1178	101463-69-8	InChI=1S/C21H11ClF6N2O3/c22-12-8-10(21(26,27)28)4-7-17(12)33-11-5-6-16(15(25)9-11)29-20(32)30-19(31)18-13(23)2-1-3-14(18)24/h1-9H,(H2,29,30,31,32)	553184	2.94623	3.38212	3.04623
Training	M1179	103055-07-8	InChI=1S/C17H8Cl2F8N2O3/c18-6-5-11(32-17(26,27)14(22)16(23,24)25)7(19)4-10(6)28-15(31)29-13(30)12-8(20)2-1-3-9(12)21/h1-5,14H,(H2,28,29,30,31)/t14-/m1/s1	5.03107	8.00689	7.64204	7.47616
Training	M1180	103112-35-2	InChI=1S/C12H8Cl5N3O2/c1-2-22-10(21)9-18-11(12(15,16)17)20(19-9)8-4-3-6(13)5-7(8)14/h3-5H,2H2,1H3	1.02615	8.59461	7.14161	8.49461
Training	M1181	103361-09-7	InChI=1S/C19H15FN2O4/c1-2-7-21-15-9-14(13(20)8-16(15)26-10-17(21)23)22-18(24)11-5-3-4-6-12(11)19(22)25/h1,8-9H,3-7,10H2	1580.76	5.35055	6.44775	5.65562
Training	M1182	104040-78-0	InChI=1S/C13H12F3N5O5S/c1-25-8-6-9(26-2)19-11(18-8)20-12(22)21-27(23,24)10-7(13(14,15)16)4-3-5-17-10/h3-6H,1-2H3,(H2,18,19,20,21,22)	6782.39	4.77856	4.16782	4.67856
Test	M1183	104098-48-8	InChI=1S/C14H17N3O3/c1-7(2)14(4)13(20)16-11(17-14)10-9(12(18)19)5-8(3)6-15-10/h5-7H,1-4H3,(H,18,19)(H,16,17,20)/t14-/m0/s1	13517.6	4.30891	4.53721	3.84546
Training	M1184	105512-06-9	InChI=1S/C17H13ClFNO4/c1-3-8-22-17(21)11(2)23-13-4-6-14(7-5-13)24-16-15(19)9-12(18)10-20-16/h1,4-7,9-11H,8H2,2H3/t11-/m0/s1	127039	3.43981	3.67617	3.33981
Training	M1185	105726-67-8	InChI=1S/C11H23NO/c1-5-8-11(7-3,9-6-2)10(13)12-4/h5-9H2,1-4H3,(H,12,13)	39208	3.67451	5.7946	4.85229
Test	M1186	106700-29-2	InChI=1S/C16H22ClNO2/c1-4-20-11-10-18(15(19)12-17)16(13(2)3)14-8-6-5-7-9-14/h5-9H,4,10-12H2,1-3H3	207519	3.15395	4.56546	4.41541
Training	M1187	106917-52-6	InChI=1S/C13H7Cl2F3N2O4S/c14-10-3-2-8(6-9(10)13(16,17)18)25(23,24)19-12-4-1-7(20(21)22)5-11(12)15/h1-6,19H	32281.4	4.10928	5.39516	4.41651
Test	M1188	107534-96-3	InChI=1S/C16H22ClN3O/c1-15(2,3)16(21,10-20-12-18-11-19-20)9-8-13-4-6-14(17)7-5-13/h4-7,11-12,21H,8-10H2,1-3H3/t16-/m0/s1	215.013	6.15583	6.11253	5.84848
Training	M1189	108173-90-6	InChI=1S/C18H41N7/c19-17(20)24-15-11-7-3-1-5-9-13-23-14-10-6-2-4-8-12-16-25-18(21)22/h23H,1-16H2,(H4,19,20,24)(H4,21,22,25)	4037.12	4.94485	4.49188	4.84485
Training	M1190	109293-97-2	InChI=1S/C15H12F2N4O3/c1-8(13-12(14(22)23)3-2-4-18-13)20-21-15(24)19-11-6-9(16)5-10(17)7-11/h2-7H,1H3,(H,22,23)(H2,19,21,24)/b20-8+	141.02	6.37483	4.43763	4.8776
Training	M1191	110235-47-7	InChI=1S/C14H13N3/c1-3-7-13-10-11(2)15-14(17-13)16-12-8-5-4-6-9-12/h4-6,8-10H,1-2H3,(H,15,16,17)	10018.9	4.34802	3.69875	4.24802
Training	M1192	110488-70-5	InChI=1S/C21H22ClNO4/c1-25-19-8-5-16(13-20(19)26-2)18(15-3-6-17(22)7-4-15)14-21(24)23-9-11-27-12-10-23/h3-8,13-14H,9-12H2,1-2H3/b18-14-	1094.4	5.5495	5.51467	5.4495
Test	M1193	110956-75-7	InChI=1S/C17H17ClFNO4/c1-9(2)15-16(21)20(17(22)24-15)13-8-14(11(18)7-12(13)19)23-10-5-3-4-6-10/h7-8,10H,3-6H2,1-2H3	44694	3.89848	5.4677	4.72048
Training	M1194	111872-58-3	InChI=1S/C24H23BrF2O3/c1-23(2,19-11-13-21(14-12-19)30-24(25,26)27)17-28-16-18-7-6-10-22(15-18)29-20-8-4-3-5-9-20/h3-15H,16-17H2,1-2H3	52352	3.95989	5.24461	4.66809
Training	M1195	111988-49-9	InChI=1S/C10H9ClN4S/c11-9-2-1-8(5-13-9)6-15-3-4-16-10(15)14-7-12/h1-2,5H,3-4,6H2/b14-10+	0.0164127	10.1875	7.90735	9.48572
Training	M1196	111991-09-4	InChI=1S/C15H18N6O6S/c1-21(2)13(22)9-6-5-7-16-12(9)28(24,25)20-15(23)19-14-17-10(26-3)8-11(18-14)27-4/h5-8H,1-4H3,(H2,17,18,19,20,23)	138197	3.47272	5.10307	3.57272
Training	M1197	112143-82-5	InChI=1S/C13H22N4O3S/c1-7-20-9(18)8-21-11-14-10(13(2,3)4)15-17(11)12(19)16(5)6/h7-8H2,1-6H3	417515	2.87682	3.62946	2.97682
Training	M1198	112281-77-3	InChI=1S/C13H11Cl2F4N3O/c14-9-1-2-10(11(15)3-9)8(4-22-7-20-6-21-22)5-23-13(18,19)12(16)17/h1-3,6-8,12H,4-5H2/t8-/m0/s1	3824.85	4.9881	5.34395	5.0881
Test	M1199	112410-23-8	InChI=1S/C22H28N2O2/c1-7-17-8-10-18(11-9-17)20(25)23-24(22(4,5)6)21(26)19-13-15(2)12-16(3)14-19/h8-14H,7H2,1-6H3,(H,23,25)	2841.38	5.09359	5.30007	4.996
Training	M1200	113036-87-6	InChI=1S/C14H10F4N4O6S/c15-11(16)27-9-5-10(28-12(17)18)20-13(19-9)21-14(24)22-29(25,26)8-4-2-1-3-7(8)6-23/h1-6,11-12H,(H2,19,20,21,22,24)	4725.46	4.96734	5.94197	5.20094
Training	M1201	113036-88-7	InChI=1S/C25H20ClF2N3O3/c26-18-10-8-17(9-11-18)23(16-6-7-16)31-34-14-15-4-12-19(13-5-15)29-25(33)30-24(32)22-20(27)2-1-3-21(22)28/h1-5,8-13,16H,6-7,14H2,(H2,29,30,32,33)/b31-23+	287039	3.22681	5.08258	3.32681
Training	M1202	113136-77-9	InChI=1S/C11H9Cl2NO3/c12-5-1-2-9(8(13)3-5)14-10(15)6-4-7(6)11(16)17/h1-3,6-7H,4H2,(H,14,15)(H,16,17)/t6-,7-/m1/s1	0.152941	9.25339	6.58707	8.17193
Training	M1203	113614-08-7	InChI=1S/C18H17F4NO2/c1-2-16(17(24)23-11-12-6-4-3-5-7-12)25-13-8-9-15(19)14(10-13)18(20,21)22/h3-10,16H,2,11H2,1H3,(H,23,24)/t16-/m0/s1	16852.4	4.32397	3.86196	4.06672
Training	M1204	114369-43-6	InChI=1S/C19H17ClN4/c20-18-8-6-16(7-9-18)10-11-19(12-21,13-24-15-22-14-23-24)17-4-2-1-3-5-17/h1-9,14-15H,10-11,13H2/t19-/m0/s1	1554.57	5.33578	5.48308	5.39118
Test	M1205	115852-48-7	InChI=1S/C15H18Cl2N2O2/c1-9(2)15(4,8-18)19-14(20)10(3)21-13-6-5-11(16)7-12(13)17/h5-7,9-10H,1-4H3,(H,19,20)/t10-,15-/m0/s1	2248.13	5.16567	5.24419	4.89923
Training	M1206	116255-48-2	InChI=1S/C13H12BrCl2N3O/c14-9-4-13(20-5-9,6-19-8-17-7-18-19)11-2-1-10(15)3-12(11)16/h1-3,7-9H,4-6H2/t9-,13+/m1/s1	6871.91	4.73934	5.42246	4.63934
Training	M1207	116714-46-6	InChI=1S/C17H9ClF8N2O4/c18-8-6-7(4-5-11(8)31-16(22,23)14(21)32-17(24,25)26)27-15(30)28-13(29)12-9(19)2-1-3-10(12)20/h1-6,14H,(H2,27,28,29,30)/t14-/m1/s1	6533.44	4.87745	5.14573	4.77745
Training	M1208	117337-19-6	InChI=1S/C15H15ClFN3O3S2/c1-23-13(21)8-24-12-7-11(10(17)6-9(12)16)18-14-19-4-2-3-5-20(19)15(22)25-14/h6-7H,2-5,8H2,1H3/b18-14-	47.5436	6.92916	7.04036	7.45461
Training	M1209	117428-22-5	InChI=1S/C18H16F3NO4/c1-24-11-14(17(23)25-2)13-7-4-3-6-12(13)10-26-16-9-5-8-15(22-16)18(19,20)21/h3-9,11H,10H2,1-2H3/b14-11-	2091.8	5.24452	5.11852	5.14452
Training	M1210	117718-60-2	InChI=1S/C16H17F5N2O2S/c1-7(2)6-8-9(15(24)25-3)11(13(17)18)23-12(16(19,20)21)10(8)14-22-4-5-26-14/h7,13H,4-6H2,1-3H3	291388	3.13363	3.19235	3.23363
Training	M1211	118134-30-8	InChI=1S/C18H35NO2/c1-6-12-19(7-2)13-16-14-20-18(21-16)10-8-15(9-11-18)17(3,4)5/h15-16H,6-14H2,1-5H3/t15-,16-,18+/m0/s1	4578	4.81278	6.43421	5.30339
Training	M1212	118712-89-3	InChI=1S/C15H12Cl2F4O2/c1-15(2)7(3-10(16)17)11(15)14(22)23-5-6-12(20)8(18)4-9(19)13(6)21/h3-4,7,11H,5H2,1-2H3/t7-,11+/m1/s1	7610.83	4.68812	6.27708	4.78812
Training	M1213	119168-77-3	InChI=1S/C18H24ClN3O/c1-6-14-15(19)16(22(5)21-14)17(23)20-11-12-7-9-13(10-8-12)18(2,3)4/h7-10H,6,11H2,1-5H3,(H,20,23)	1.52916	8.33911	5.91857	6.33348
Test	M1214	119446-68-3	InChI=1S/C19H17Cl2N3O3/c1-13-9-25-19(27-13,10-24-12-22-11-23-24)17-7-6-16(8-18(17)21)26-15-4-2-14(20)3-5-15/h2-8,11-13H,9-10H2,1H3/t13-,19-/m1/s1	55.9765	6.8608	5.92739	5.73615
Training	M1215	119515-38-7	InChI=1S/C4H5NO2/c1-3-2-4(6)5-7-3/h2H,1H3,(H,5,6)	187.804	5.72232	5.58452	5.62232
Test	M1216	120068-37-3	InChI=1S/C12H4Cl2F6N4OS/c13-5-1-4(11(15,16)17)2-6(14)8(5)24-10(22)9(7(3-21)23-24)26(25)12(18,19)20/h1-2H,22H2/t26-/m1/s1	441171	2.99602	2.69454	3.01296
Training	M1217	120116-88-3	InChI=1S/C13H13ClN4O2S/c1-9-4-6-10(7-5-9)12-13(14)16-11(8-15)18(12)21(19,20)17(2)3/h4-7H,1-3H3	141.163	6.36187	6.63233	6.30006
Training	M1218	120162-55-2	InChI=1S/C13H16N10O5S/c1-22-11(7(6-14-22)10-18-21-23(2)19-10)29(25,26)20-13(24)17-12-15-8(27-3)5-9(16-12)28-4/h5-6H,1-4H3,(H2,15,16,17,20,24)	248.271	6.23284	4.83064	4.76154
Test	M1219	120923-37-7	InChI=1S/C9H15N5O7S2/c1-14(22(4,16)17)23(18,19)13-9(15)12-8-10-6(20-2)5-7(11-8)21-3/h5H,1-4H3,(H2,10,11,12,13,15)	599676	2.78955	3.70803	3.78479
Training	M1220	120928-09-8	InChI=1S/C20H22N2O/c1-20(2,3)16-10-8-15(9-11-16)12-13-23-19-17-6-4-5-7-18(17)21-14-22-19/h4-11,14H,12-13H2,1-3H3	29862.4	4.01116	3.04083	3.91116
Training	M1221	121552-61-2	InChI=1S/C14H15N3/c1-10-9-13(11-7-8-11)17-14(15-10)16-12-5-3-2-4-6-12/h2-6,9,11H,7-8H2,1H3,(H,15,16,17)	3.01462	7.87351	6.39177	7.72037
Training	M1222	121776-33-8	InChI=1S/C11H13Cl2NO3/c1-11(2)14(10(15)9(12)13)6-8(17-11)7-4-3-5-16-7/h3-5,8-9H,6H2,1-2H3/t8-/m0/s1	68.3121	6.60975	5.1312	6.03628
Training	M1223	122008-78-0	InChI=1S/C16H12FNO4/c1-10(16(19)20)21-12-3-5-13(6-4-12)22-15-7-2-11(9-18)8-14(15)17/h2-8,10H,1H3,(H,19,20)/t10-/m0/s1	28162.9	4.02928	4.80018	4.12928
Training	M1224	122453-73-0	InChI=1S/C15H11BrClF3N2O/c1-2-23-8-22-13(9-3-5-10(17)6-4-9)11(7-21)12(16)14(22)15(18,19)20/h3-6H,2,8H2,1H3	135299	3.47895	4.35733	3.57895
Test	M1225	122548-33-8	InChI=1S/C14H13ClN6O5S/c1-25-9-7-10(26-2)18-13(17-9)19-14(22)20-27(23,24)12-11(15)16-8-5-3-4-6-21(8)12/h3-7H,1-2H3,(H2,17,18,19,20,22)	6.17774	7.82492	6.48487	6.73402
Training	M1226	122836-35-5	InChI=1S/C11H10Cl2F2N4O3S/c1-5-16-19(11(20)18(5)10(14)15)9-4-8(17-23(2,21)22)6(12)3-7(9)13/h3-4,10,17H,1-2H3	37517.7	4.01369	5.24805	4.11369
Training	M1227	122931-48-0	InChI=1S/C14H17N5O7S2/c1-4-27(21,22)9-6-5-7-15-12(9)28(23,24)19-14(20)18-13-16-10(25-2)8-11(17-13)26-3/h5-8H,4H2,1-3H3,(H2,16,17,18,19,20)	67303.4	3.80689	5.73878	4.97743
Training	M1228	123312-89-0	InChI=1S/C10H11N5O/c1-8-7-15(10(16)14-13-8)12-6-9-3-2-4-11-5-9/h2-6H,7H2,1H3,(H,14,16)/b12-6+	181256	3.07862	3.93077	3.17862
Training	M1229	123342-93-8	InChI=1S/C13H11ClN2O4S/c1-19-9-6-10(20-2)16-13(15-9)21-8-5-3-4-7(14)11(8)12(17)18/h3-6H,1-2H3,(H,17,18)	130866	3.39739	3.13477	3.29739
Training	M1230	123572-88-3	InChI=1S/C17H20ClN3O2/c1-9-13(15(18)21(5)20-9)16(22)19-12-8-6-7-11-14(12)10(2)23-17(11,3)4/h6-8,10H,1-5H3,(H,19,22)/t10-/m0/s1	1.12376e+06	2.47283	4.68668	2.87106
Test	M1231	124495-18-7	InChI=1S/C15H8Cl2FNO/c16-9-7-12(17)15-13(8-9)19-6-5-14(15)20-11-3-1-10(18)2-4-11/h1-8H	22984.6	4.1273	5.2248	4.77165
Training	M1232	125116-23-6	InChI=1S/C17H22ClN3O/c1-16(2)8-7-14(9-13-3-5-15(18)6-4-13)17(16,22)10-21-12-19-11-20-21/h3-6,11-12,14,22H,7-10H2,1-2H3/t14-,17+/m0/s1	83.0361	6.58565	6.02799	6.30006
Training	M1233	125225-28-7	InChI=1S/C18H24ClN3O/c1-13(2)17-8-5-15(9-14-3-6-16(19)7-4-14)18(17,23)10-22-12-20-11-21-22/h3-4,6-7,11-13,15,17,23H,5,8-10H2,1-2H3/t15-,17+,18-/m0/s1	4071.05	4.91385	4.33562	4.90048
Training	M1234	125306-83-4	InChI=1S/C16H22N4O3S/c1-6-19(7-2)16(21)20-10-17-15(18-20)24(22,23)14-12(4)8-11(3)9-13(14)5/h8-10H,6-7H2,1-5H3	1784.43	5.29311	4.32895	5.19311
Training	M1235	126801-58-9	InChI=1S/C15H18N4O7S/c1-4-25-10-7-5-6-8-11(10)26-27(21,22)19-15(20)18-14-16-12(23-2)9-13(17-14)24-3/h5-9H,4H2,1-3H3,(H2,16,17,18,19,20)	568422	2.84564	4.96118	2.97237
Training	M1236	126833-17-8	InChI=1S/C14H17Cl2NO2/c1-14(7-3-2-4-8-14)13(19)17-9-5-6-10(18)12(16)11(9)15/h5-6,18H,2-4,7-8H2,1H3,(H,17,19)	232872	3.11317	4.41132	3.21317
Test	M1237	128621-72-7	InChI=1S/C13H10Cl2F3N3O3/c1-5-19-21(13(24)20(5)12(17)18)10-3-6(2-8(15)11(22)23)7(14)4-9(10)16/h3-4,8,12H,2H2,1H3,(H,22,23)/t8-/m1/s1	23897.7	4.20613	5.18183	5.54614
Training	M1238	129025-54-3	InChI=1S/C13H11ClN2O3/c1-2-10-12(13(18)19)11(17)7-15-16(10)9-5-3-8(14)4-6-9/h3-7H,2H2,1H3,(H,18,19)	7109.87	4.59326	4.86491	4.00879
Training	M1239	129558-76-5	InChI=1S/C21H22ClN3O2/c1-4-18-19(22)20(25(3)24-18)21(26)23-13-15-7-11-17(12-8-15)27-16-9-5-14(2)6-10-16/h5-12H,4,13H2,1-3H3,(H,23,26)	1.64325e+06	2.36848	4.36421	2.68327
Training	M1240	129630-17-7	InChI=1S/C15H13Cl2F3N2O4/c1-3-24-11(23)6-25-10-4-7(9(18)5-8(10)16)13-12(17)14(22(2)21-13)26-15(19)20/h4-5,15H,3,6H2,1-2H3	8.61073	7.6811	6.12396	6.15895
Training	M1241	129909-90-6	InChI=1S/C10H19N5O2/c1-6(2)7-13-15(9(17)14(7)11)8(16)12-10(3,4)5/h6H,11H2,1-5H3,(H,12,16)	58.3988	6.61614	6.15589	5.93705
Training	M1242	130000-40-7	InChI=1S/C13H6Br2F6N2O2S/c1-4-22-10(12(16,17)18)9(26-4)11(24)23-8-6(14)2-5(3-7(8)15)25-13(19,20)21/h2-3H,1H3,(H,23,24)	260431	3.30699	3.89882	3.40699
Training	M1243	130339-07-0	InChI=1S/C15H16ClF2N3O/c1-3-12(21-14-13(16)9(2)19-8-20-14)10-4-6-11(7-5-10)22-15(17)18/h4-8,12,15H,3H2,1-2H3,(H,19,20,21)/t12-/m1/s1	868.951	5.57656	7.49332	6.54603
Training	M1244	131341-86-1	InChI=1S/C12H6F2N2O2/c13-12(14)17-10-3-1-2-8(11(10)18-12)9-6-16-5-7(9)4-15/h1-3,5-6,16H	726.934	5.53328	5.20656	5.32907
Training	M1245	131807-57-3	InChI=1S/C22H18N2O4/c1-22(16-12-14-19(15-13-16)27-18-10-6-3-7-11-18)20(25)24(21(26)28-22)23-17-8-4-2-5-9-17/h2-15,23H,1H3/t22-/m1/s1	603.403	5.79272	5.05737	5.19849
Training	M1246	131860-33-8	InChI=1S/C22H17N3O5/c1-27-13-17(22(26)28-2)16-8-4-6-10-19(16)30-21-11-20(24-14-25-21)29-18-9-5-3-7-15(18)12-23/h3-11,13-14H,1-2H3/b17-13+	12.9294	7.49414	5.85224	6.45667
Test	M1247	131929-60-7	InChI=1S/C41H65NO10/c1-10-26-12-11-13-34(52-36-17-16-33(42(5)6)23(3)48-36)22(2)37(44)32-20-30-28(31(32)21-35(43)50-26)15-14-25-18-27(19-29(25)30)51-41-40(47-9)39(46-8)38(45-7)24(4)49-41/h14-15,20,22-31,33-34,36,38-41H,10-13,16-19,21H2,1-9H3/t22-,23+,24-,25+,26-,27-,28-,29-,30-,31-,33-,34+,36-,38-,39-,40+,41-/m1/s1	417.34	6.24399	5.77417	5.41977
Test	M1248	131929-63-0	InChI=1S/C40H63NO10/c1-9-25-11-10-12-33(51-35-16-15-32(41-5)22(3)47-35)21(2)36(43)31-19-29-27(30(31)20-34(42)49-25)14-13-24-17-26(18-28(24)29)50-40-39(46-8)38(45-7)37(44-6)23(4)48-40/h13-14,19,21-30,32-33,35,37-41H,9-12,15-18,20H2,1-8H3/t21-,22-,23+,24-,25+,26+,27+,28+,29-,30-,32-,33+,35+,37-,38-,39+,40+/m0/s1	13731.7	4.71836	6.97045	4.60757
Test	M1249	131983-72-7	InChI=1S/C17H20ClN3O/c1-16(2)8-7-14(9-13-3-5-15(18)6-4-13)17(16,22)10-21-12-19-11-20-21/h3-6,9,11-12,22H,7-8,10H2,1-2H3/b14-9-/t17-/m1/s1	2877.42	5.04317	6.62311	4.47251
Test	M1250	133220-30-1	InChI=1S/C20H17ClO3/c1-2-19(17(22)15-8-3-4-9-16(15)18(19)23)11-20(12-24-20)13-6-5-7-14(21)10-13/h3-10H,2,11-12H2,1H3/t20-/m1/s1	9650.96	4.54793	4.14338	4.72401
Test	M1251	133855-98-8	InChI=1S/C17H13ClFN3O/c18-15-4-2-1-3-14(15)16-17(23-16,9-22-11-20-10-21-22)12-5-7-13(19)8-6-12/h1-8,10-11,16H,9H2/t16-,17+/m0/s1	7643.99	4.63487	5.50821	4.7659
Test	M1252	134098-61-6	InChI=1S/C24H27N3O4/c1-17-21(22(27(5)26-17)30-20-9-7-6-8-10-20)15-25-29-16-18-11-13-19(14-12-18)23(28)31-24(2,3)4/h6-15H,16H2,1-5H3/b25-15+	11107.4	4.57917	4.44409	4.12399
Training	M1253	134605-64-4	InChI=1S/C20H18ClF3N2O6/c1-5-8-31-17(29)19(2,3)32-16(28)12-9-11(6-7-13(12)21)26-15(27)10-14(20(22,23)24)25(4)18(26)30/h5-7,9-10H,1,8H2,2-4H3	3.37956	8.14766	6.80925	7.62267
Training	M1254	135158-54-2	InChI=1S/C8H6N2OS2/c1-12-8(11)5-3-2-4-6-7(5)13-10-9-6/h2-4H,1H3	3808.59	4.74203	5.7916	4.84203
Test	M1255	135186-78-6	InChI=1S/C15H14N2O4S/c1-8-9-5-4-6-10(13(9)14(18)21-8)22-15-16-11(19-2)7-12(17-15)20-3/h4-8H,1-3H3/t8-/m1/s1	3633.49	4.94258	5.23914	5.01842
Test	M1256	135410-20-7	InChI=1S/C10H11ClN4/c1-8(14-7-12)15(2)6-9-3-4-10(11)13-5-9/h3-5H,6H2,1-2H3/b14-8+	67498.6	3.51837	5.26139	4.21464
Training	M1257	135590-91-9	InChI=1S/C16H18Cl2N2O4/c1-4-23-14(21)12-9-16(3,15(22)24-5-2)20(19-12)13-7-6-10(17)8-11(13)18/h6-8H,4-5,9H2,1-3H3/t16-/m1/s1	83471.4	3.65044	3.9964	3.75044
Training	M1258	136426-54-5	InChI=1S/C16H8Cl2FN5O/c17-9-1-4-14(12(18)5-9)24-15(25)11-6-10(19)2-3-13(11)22-16(24)23-8-20-7-21-23/h1-8H	53417.6	3.8477	5.74451	4.63181
Test	M1259	136849-15-5	InChI=1S/C17H19N5O6S/c1-27-13-9-14(28-2)19-16(18-13)20-17(24)22-29(25,26)21-12-6-4-3-5-11(12)15(23)10-7-8-10/h3-6,9-10,21H,7-8H2,1-2H3,(H2,18,19,20,22,24)	5601.53	4.87642	5.26652	5.0233
Training	M1260	137641-05-5	InChI=1S/C19H12F4N2O2/c20-13-7-9-14(10-8-13)24-18(26)16-5-2-6-17(25-16)27-15-4-1-3-12(11-15)19(21,22)23/h1-11H,(H,24,26)	8125.63	4.66568	4.74743	4.56568
Training	M1261	138164-12-2	InChI=1S/C24H33NO4/c1-7-10-19(26)23-15(5)11-14(4)22(16(23)6)17-12-20(27)24(21(28)13-17)18(8-2)25-29-9-3/h11,17,27H,7-10,12-13H2,1-6H3/b25-18+/t17-/m1/s1	649.761	5.78879	5.8924	5.88075
Training	M1262	138261-41-3	InChI=1S/C9H10ClN5O2/c10-8-2-1-7(5-12-8)6-14-4-3-11-9(14)13-15(16)17/h1-2,5H,3-4,6H2,(H,11,13)	2367.69	5.03334	5.74483	4.93334
Training	M1263	139528-85-1	InChI=1S/C14H13Cl2N5O4S/c1-7-4-5-8(15)12(11(7)16)20-26(22,23)14-18-13-17-9(24-2)6-10(25-3)21(13)19-14/h4-6,20H,1-3H3	139058	3.47825	4.81584	3.57825
Test	M1264	140163-89-9	InChI=1S/C11H21N4O2PS/c1-4-9-19-18(16,17-6-3)15-8-7-14(5-2)11(15)13-10-12/h4-9H2,1-3H3/b13-11-	4019.61	4.87919	5.75211	5.29971
Training	M1265	140923-17-7	InChI=1S/C18H28N2O3/c1-11(2)16(20-18(22)23-12(3)4)17(21)19-14(6)15-9-7-13(5)8-10-15/h7-12,14,16H,1-6H3,(H,19,21)(H,20,22)/t14-,16+/m0/s1	547.47	5.76737	5.73184	5.86737
Training	M1266	141112-29-0	InChI=1S/C15H12F3NO4S/c1-24(21,22)12-6-9(15(16,17)18)4-5-10(12)13(20)11-7-19-23-14(11)8-2-3-8/h4-8H,2-3H2,1H3	22203.3	4.20906	5.24366	4.44813
Training	M1267	141517-21-7	InChI=1S/C20H19F3N2O4/c1-13(14-8-6-9-16(11-14)20(21,22)23)24-29-12-15-7-4-5-10-17(15)18(25-28-3)19(26)27-2/h4-11H,12H2,1-3H3/b24-13-,25-18-	64553.8	3.80113	5.27837	4.45784
Training	M1268	141776-32-1	InChI=1S/C16H18N6O7S2/c1-4-30(24,25)13-14(22-8-6-5-7-10(22)17-13)31(26,27)21-16(23)20-15-18-11(28-2)9-12(19-15)29-3/h5-9H,4H2,1-3H3,(H2,18,19,20,21,23)	12.673	7.56966	6.00421	6.43953
Training	M1269	142459-58-3	InChI=1S/C14H13F4N3O2S/c1-8(2)21(10-5-3-9(15)4-6-10)11(22)7-23-13-20-19-12(24-13)14(16,17)18/h3-6,8H,7H2,1-2H3	74136.6	3.69027	5.19666	3.79027
Training	M1270	143390-89-0	InChI=1S/C18H19NO4/c1-13-8-4-7-11-16(13)23-12-14-9-5-6-10-15(14)17(19-22-3)18(20)21-2/h4-11H,12H2,1-3H3/b19-17-	26649.1	4.07034	6.00762	4.75156
Test	M1271	144651-06-9	InChI=1S/C17H18N4O6S/c1-10-7-11(2)19-16(18-10)20-17(23)21-28(24,25)14-6-4-3-5-13(14)15(22)27-12-8-26-9-12/h3-7,12H,8-9H2,1-2H3,(H2,18,19,20,21,23)	241.243	6.22651	5.36482	4.79049
Training	M1272	145026-81-9	InChI=1S/C15H18N4O7S/c1-4-9-26-14-16-19(15(22)18(14)2)13(21)17-27(23,24)11-8-6-5-7-10(11)12(20)25-3/h5-8H,4,9H2,1-3H3,(H,17,21)	87635.4	3.65763	3.96476	3.55763
Training	M1273	145026-88-6	InChI=1S/C12H11F3N4O6S/c1-18-10(24-2)16-19(11(18)21)9(20)17-26(22,23)8-6-4-3-5-7(8)25-12(13,14)15/h3-6H,1-2H3,(H,17,20)	106438	3.57093	4.26183	3.67093
Training	M1274	145099-21-4	InChI=1S/C14H14F3N5O6S/c1-26-9-6-10(27-2)20-12(19-9)21-13(23)22-29(24,25)11-8(4-3-5-18-11)28-7-14(15,16)17/h3-6H,7H2,1-2H3,(H2,19,20,21,22,23)	120291	3.5606	4.90656	3.56331
Training	M1275	145348-21-6	InChI=1S/C14H18O4S/c1-10(2)18-13(15)14(8-9-14)19(16,17)12-6-4-11(3)5-7-12/h4-7,10H,8-9H2,1-3H3	69725.1	3.60741	4.50367	3.70741
Training	M1276	145348-24-9	InChI=1S/C14H17ClO4S/c1-13(2,3)19-12(16)14(8-9-14)20(17,18)11-6-4-10(15)5-7-11/h4-7H,8-9H2,1-3H3	60366.1	3.71999	4.95527	3.81999
Test	M1277	145701-21-9	InChI=1S/C13H10Cl2FN5O3S/c1-2-24-13-17-9(16)6-10-18-12(19-21(10)13)25(22,23)20-11-7(14)4-3-5-8(11)15/h3-6,20H,2H2,1H3	67415.7	3.78	5.57692	4.77724
Training	M1278	145701-23-1	InChI=1S/C12H8F3N5O3S/c1-23-12-16-5-8(15)10-17-11(18-20(10)12)24(21,22)19-9-6(13)3-2-4-7(9)14/h2-5,19H,1H3	63680.9	3.75143	5.96655	5.26803
Training	M1279	147150-35-4	InChI=1S/C15H13ClFN5O5S/c1-3-27-15-18-10(17)7-11-19-14(20-22(11)15)28(24,25)21-12-8(13(23)26-2)5-4-6-9(12)16/h4-7,21H,3H2,1-2H3	349319	3.09006	4.49937	3.19006
Training	M1280	149877-41-8	InChI=1S/C17H20N2O3/c1-12(2)22-17(20)19-18-15-11-14(9-10-16(15)21-3)13-7-5-4-6-8-13/h4-12,18H,1-3H3,(H,19,20)	113904	3.42109	5.52553	4.49603
Training	M1281	149961-52-4	InChI=1S/C19H22N2O3/c1-13-9-10-14(2)17(11-13)24-12-15-7-5-6-8-16(15)18(21-23-4)19(22)20-3/h5-11H,12H2,1-4H3,(H,20,22)/b21-18+	543.345	5.77866	5.58156	5.67866
Training	M1282	149979-41-9	InChI=1S/C17H24ClNO4/c1-2-14(19-23-7-3-6-18)17-15(20)10-13(11-16(17)21)12-4-8-22-9-5-12/h3,6,12-13,20H,2,4-5,7-11H2,1H3/b6-3+,19-14+/t13-/m1/s1	41.2639	6.91824	5.3896	5.1099
Training	M1283	150824-47-8	InChI=1S/C11H15ClN4O2/c1-3-15(11(13-2)8-16(17)18)7-9-4-5-10(12)14-6-9/h4-6,8,13H,3,7H2,1-2H3/b11-8-	79195.8	3.53381	4.56625	3.63381
Training	M1284	156963-66-5	InChI=1S/C22H19ClO4S2/c1-29(26,27)16-9-10-17(18(23)12-16)21(25)19-20(24)13-7-8-14(11-13)22(19)28-15-5-3-2-4-6-15/h2-6,9-10,12-14H,7-8,11H2,1H3/t13-,14+/m1/s1	8.82966	7.70433	6.66156	7.31567
Training	M1285	158062-67-0	InChI=1S/C9H6F3N3O/c10-9(11,12)7-1-3-14-5-6(7)8(16)15-4-2-13/h1,3,5H,4H2,(H,15,16)	512.698	5.65028	6.08915	5.66732
Training	M1286	160791-64-0	InChI=1S/C26H22BrF2NO4/c1-16(2)24(17-6-10-21(11-7-17)33-26(28)29)25(31)34-23(15-30)18-4-3-5-22(14-18)32-20-12-8-19(27)9-13-20/h3-14,16,23-24,26H,1-2H3/t23-,24-/m1/s1	231437	3.36014	3.41315	3.46014
Training	M1287	161050-58-4	InChI=1S/C22H28N2O3/c1-14-11-15(2)13-17(12-14)21(26)24(22(4,5)6)23-20(25)18-9-8-10-19(27-7)16(18)3/h8-13H,1-7H3,(H,23,25)	9.935	7.56923	7.59546	8.01454
Training	M1288	161326-34-7	InChI=1S/C17H17N3OS/c1-17(13-9-5-3-6-10-13)15(21)20(16(18-17)22-2)19-14-11-7-4-8-12-14/h3-12,19H,1-2H3/t17-/m0/s1	3126.95	4.9982	5.70678	5.0982
Test	M1289	162320-67-4	InChI=1S/C14H7ClF2N4/c15-9-5-2-1-4-8(9)13-18-20-14(21-19-13)12-10(16)6-3-7-11(12)17/h1-7H	185.9	6.21457	6.09252	5.43079
Training	M1290	162650-77-3	InChI=1S/C14H16N4OS2/c1-3-9-12(21-14(18-9)16-4-2)13(19)17-10(8-15)11-6-5-7-20-11/h5-7,10H,3-4H2,1-2H3,(H,16,18)(H,17,19)/t10-/m1/s1	147.238	6.33772	5.68102	6.01504
Training	M1291	163515-14-8	InChI=1S/C12H18ClNO2S/c1-8-7-17-10(3)12(8)14(11(15)5-13)9(2)6-16-4/h7,9H,5-6H2,1-4H3/t9-/m0/s1	314.154	5.94344	5.02745	5.2162
Training	M1292	163520-33-0	InChI=1S/C18H17NO3/c1-2-21-17(20)16-13-18(22-19-16,14-9-5-3-6-10-14)15-11-7-4-8-12-15/h3-12H,2,13H2,1H3	12850.1	4.36141	4.63712	4.33647
Training	M1293	165252-70-0	InChI=1S/C7H14N4O3/c1-8-7(10-11(12)13)9-4-6-2-3-14-5-6/h6H,2-5H2,1H3,(H2,8,9,10)/t6-/m0/s1	349.192	5.76274	5.56621	5.59055
Training	M1294	173159-57-4	InChI=1S/C17H20N6O7S/c1-23(2)15(25)11-6-5-10(18-9-24)7-12(11)31(27,28)22-17(26)21-16-19-13(29-3)8-14(20-16)30-4/h5-9H,1-4H3,(H,18,24)(H2,19,20,21,22,26)	2.23747e+06	2.3058	3.27574	2.4058
Test	M1295	173584-44-6	InChI=1S/C22H17ClF3N3O7/c1-33-18(30)21-10-12-9-13(23)3-8-16(12)17(21)27-28(11-35-21)19(31)29(20(32)34-2)14-4-6-15(7-5-14)36-22(24,25)26/h3-9H,10-11H2,1-2H3/t21-/m0/s1	116663	3.65556	3.71032	3.15572
Training	M1296	174514-07-9	InChI=1S/C15H12BrClF4N2O2/c1-6(2)25-14(24)7-4-8(10(18)5-9(7)17)12-11(16)13(15(19,20)21)23(3)22-12/h4-6H,1-3H3	504.271	5.94435	6.57649	6.04435
Training	M1297	175013-18-0	InChI=1S/C19H18ClN3O4/c1-25-19(24)23(26-2)17-6-4-3-5-14(17)13-27-18-11-12-22(21-18)16-9-7-15(20)8-10-16/h3-12H,13H2,1-2H3	34.0943	7.05595	6.42017	6.95595
Training	M1298	178928-70-6	InChI=1S/C14H15Cl2N3OS/c15-11-4-2-1-3-10(11)7-14(20,13(16)5-6-13)8-19-12(21)17-9-18-19/h1-4,9,20H,5-8H2,(H,17,18,21)/t14-/m1/s1	14.2029	7.38451	5.81414	6.13405
Training	M1299	188425-85-6	InChI=1S/C18H12Cl2N2O/c19-13-9-7-12(8-10-13)14-4-1-2-6-16(14)22-18(23)15-5-3-11-21-17(15)20/h1-11H,(H,22,23)	1296.03	5.42294	4.25262	5.32294
Training	M1300	213464-77-8	InChI=1S/C16H20N6O6S/c1-22(2)14(23)10-7-5-6-8-11(10)20-29(25,26)21-16(24)19-15-17-12(27-3)9-13(18-15)28-4/h5-9,20H,1-4H3,(H2,17,18,19,21,24)	6591.86	4.8088	6.1859	5.62434
Training	M1301	219714-96-2	InChI=1S/C16H14F5N5O5S/c1-29-10-6-22-15(30-2)26-13(10)23-14(24-26)25-32(27,28)12-8(16(19,20)21)4-3-5-9(12)31-7-11(17)18/h3-6,11H,7H2,1-2H3,(H,24,25)	119581	3.60662	4.42908	3.70662
Training	M1302	229977-93-9	InChI=1S/C20H21F3N2O5/c1-12(2)30-19-24-16(20(21,22)23)9-17(25-19)29-10-13-7-5-6-8-14(13)15(11-27-3)18(26)28-4/h5-9,11-12H,10H2,1-4H3/b15-11+	86711.5	3.69173	5.66111	4.4234
Training	M1303	240494-70-6	InChI=1S/C18H20F4O3/c1-5-6-11-12(18(11,2)3)17(23)25-8-10-15(21)13(19)9(7-24-4)14(20)16(10)22/h5-6,11-12H,7-8H2,1-4H3/b6-5+/t11-,12-/m0/s1	76.0598	6.67556	6.20936	6.08202
Training	M1304	256412-89-2	InChI=1S/C23H18ClFN2O4/c1-14(22(28)27(2)20-6-4-3-5-18(20)25)29-16-8-10-17(11-9-16)30-23-26-19-12-7-15(24)13-21(19)31-23/h3-14H,1-2H3	5.75007	7.88462	5.37142	5.81458
Training	M1305	272451-65-7	InChI=1S/C23H22F7IN2O4S/c1-12-10-13(21(24,22(25,26)27)23(28,29)30)8-9-16(12)32-18(34)14-6-5-7-15(31)17(14)19(35)33-20(2,3)11-38(4,36)37/h5-10H,11H2,1-4H3,(H,32,34)(H,33,35)	445.793	6.1849	6.7956	6.0849
Training	M1306	317815-83-1	InChI=1S/C12H14N4O7S2/c1-6-8(7(5-24-6)9(17)22-3)25(20,21)14-10(18)16-12(19)15(2)11(13-16)23-4/h5H,1-4H3,(H,14,18)	34.3257	7.05588	8.43904	7.15588
Training	M1307	361377-29-9	InChI=1S/C21H16ClFN4O5/c1-28-26-18(21-27-30-11-10-29-21)13-6-2-4-8-15(13)31-19-17(23)20(25-12-24-19)32-16-9-5-3-7-14(16)22/h2-9,12H,10-11H2,1H3/b26-18+	115884	3.59762	4.02026	3.69762
Training	M1308	365400-11-9	InChI=1S/C14H13F3N2O4S/c1-7-11(13(21)19(2)18-7)12(20)9-5-4-8(14(15,16)17)6-10(9)24(3,22)23/h4-6,21H,1-3H3	379.044	5.98041	6.84898	6.08041
Training	M1309	374726-62-2	InChI=1S/C23H22ClNO4/c1-4-14-28-20-11-6-17(16-21(20)27-3)12-13-25-23(26)22(29-15-5-2)18-7-9-19(24)10-8-18/h1-2,6-11,16,22H,12-15H2,3H3,(H,25,26)/t22-/m1/s1	106060	3.58922	4.86019	3.68922
Training	M1310	412928-75-7	InChI=1S/C18H22FN5O8S/c1-10(19)16(32-14(25)9-29-2)15-11(6-5-7-20-15)33(27,28)24-18(26)23-17-21-12(30-3)8-13(22-17)31-4/h5-8,10,16H,9H2,1-4H3,(H2,21,22,23,24,26)/t10-,16+/m1/s1	8402.87	4.76351	5.1664	4.66351
Training	M1311	422556-08-9	InChI=1S/C14H13F3N6O5S/c1-26-8-6-9(27-2)23-13(19-8)20-12(21-23)22-29(24,25)10-7(14(15,16)17)4-5-18-11(10)28-3/h4-6H,1-3H3,(H,21,22)	8910.49	4.68794	4.28665	3.91172
Training	M1312	473798-59-3	InChI=1S/C17H21N3O2S/c1-5-10-23-17(22)20-15(18)14(16(21)19(20)11(2)3)13-9-7-6-8-12(13)4/h5-9,11H,1,10,18H2,2-4H3	76305.5	3.63784	4.9471	3.65198
Training	M1313	500008-45-7	InChI=1S/C18H14BrCl2N5O2/c1-9-6-10(17(27)22-2)15(12(21)7-9)24-18(28)13-8-14(19)25-26(13)16-11(20)4-3-5-23-16/h3-8H,1-2H3,(H,22,27)(H,24,28)	8017.62	4.78003	5.51379	4.88003
Training	M1314	581809-46-3	InChI=1S/C18H12Cl2F3N3O/c1-26-8-12(16(25-26)17(22)23)18(27)24-15-5-3-10(21)7-11(15)9-2-4-13(19)14(20)6-9/h2-8,17H,1H3,(H,24,27)	9.94487	7.61962	6.63708	7.13472
Training	M1315	907204-31-3	InChI=1S/C18H12F5N3O/c1-26-8-11(16(25-26)17(22)23)18(27)24-14-5-3-2-4-10(14)9-6-12(19)15(21)13(20)7-9/h2-8,17H,1H3,(H,24,27)	1104.66	5.53804	6.28532	5.88542
Training	M1316	907204-31-3	c1(c(cccc1)c1cc(c(c(c1)F)F)F)NC(=O)c1cn(nc1C(F)F)C	6779.99	4.75004	5.73216	4.85004
Test	M1317	52645-53-1	InChI=1S/C21H20Cl2O3/c1-21(2)17(12-18(22)23)19(21)20(24)25-13-14-7-6-10-16(11-14)26-15-8-4-3-5-9-15/h3-12,17,19H,13H2,1-2H3/t17-,19+/m1/s1	2.95984	8.12123	7.01949	8.71435
Test	M1318	52918-63-5	InChI=1S/C22H19Br2NO3/c1-22(2)17(12-19(23)24)20(22)21(26)28-18(13-25)14-7-6-10-16(11-14)27-15-8-4-3-5-9-15/h3-12,17-18,20H,1-2H3/t17-,18+,20-/m1/s1	0.216446	9.36811	7.36677	8.85527
Test	M1319	68359-37-5	InChI=1S/C22H18Cl2FNO3/c1-22(2)15(11-19(23)24)20(22)21(27)29-18(12-26)13-8-9-16(25)17(10-13)28-14-6-4-3-5-7-14/h3-11,15,18,20H,1-2H3/t15-,18-,20+/m0/s1	0.599484	8.86	7.03315	8.90263
Test	M1320	60348-60-9	InChI=1S/C12H5Br5O/c13-6-1-2-11(9(16)3-6)18-12-5-8(15)7(14)4-10(12)17/h1-5H	54.0258	7.01921	7.93705	6.91941
Test	M1321	121-29-9	InChI=1S/C22H28O5/c1-7-8-9-10-15-14(3)18(12-17(15)23)27-21(25)19-16(22(19,4)5)11-13(2)20(24)26-6/h7-9,11,16,18-19H,1,10,12H2,2-6H3/b9-8+,13-11+/t16-,18+,19+/m1/s1	15.9587	7.36808	5.99594	7.22292
Test	M1322	26002-80-2	InChI=1S/C23H26O3/c1-16(2)13-20-21(23(20,3)4)22(24)25-15-17-9-8-12-19(14-17)26-18-10-6-5-7-11-18/h5-14,20-21H,15H2,1-4H3/t20-,21+/m1/s1	5.70302	7.78852	6.86488	8.04263
Test	M1323	29761-21-5	InChI=1S/C22H31O4P/c1-20(2)14-8-4-3-5-13-19-24-27(23,25-21-15-9-6-10-16-21)26-22-17-11-7-12-18-22/h6-7,9-12,15-18,20H,3-5,8,13-14,19H2,1-2H3	31.0148	7.1	8.10701	6.1525
Test	M1324	71-23-8	InChI=1S/C3H8O/c1-2-3-4/h4H,2-3H2,1H3	6.63986e+06	0.956679	2.39991	1.44416
Test	M1325	29232-93-7	InChI=1S/C11H20N3O3PS/c1-6-14(7-2)11-12-9(3)8-10(13-11)17-18(19,15-4)16-5/h8H,6-7H2,1-5H3	0.218931	9.14447	6.52533	8.52481
Test	M1326	121-75-5	InChI=1S/C10H19O6PS2/c1-5-15-9(11)7-8(10(12)16-6-2)19-17(18,13-3)14-4/h8H,5-7H2,1-4H3/t8-/m1/s1	8.8162	7.5737	6.15095	7.21072
Test	M1327	333-41-5	InChI=1S/C12H21N2O3PS/c1-6-15-18(19,16-7-2)17-11-8-10(5)13-12(14-11)9(3)4/h8-9H,6-7H2,1-5H3	0.915277	8.52182	6.92256	8.45385
Test	M1328	56-38-2	InChI=1S/C10H14NO5PS/c1-3-14-17(18,15-4-2)16-10-7-5-9(6-8-10)11(12)13/h5-8H,3-4H2,1-2H3	1.33108	8.34008	6.85814	8.586
Test	M1329	2921-88-2	InChI=1S/C9H11Cl3NO3PS/c1-3-14-17(18,15-4-2)16-9-7(11)5-6(10)8(12)13-9/h5H,3-4H2,1-2H3	0.298179	9.07032	7.98864	9.19078
Test	M1330	13071-79-9	InChI=1S/C9H21O2PS3/c1-6-10-12(13,11-7-2)15-8-14-9(3,4)5/h6-8H2,1-5H3	1.05039	8.43869	7.84929	8.86868
Test	M1331	944-22-9	InChI=1S/C10H15OPS2/c1-3-11-12(13,4-2)14-10-8-6-5-7-9-10/h5-9H,3-4H2,1-2H3/t12-/m1/s1	7.46695	7.51837	6.90017	7.66939
Test	M1332	298-02-2	InChI=1S/C7H17O2PS3/c1-4-8-10(11,9-5-2)13-7-12-6-3/h4-7H2,1-3H3	11.6956	7.34758	7.37864	8.07379
Test	M1333	67-56-1	InChI=1S/CH4O/c1-2/h2H,1H3	3.28769e+06	0.988827	1.97216	1.3278
Test	M1334	298-00-0	InChI=1S/C8H10NO5PS/c1-12-15(16,13-2)14-8-5-3-7(4-6-8)9(10)11/h3-6H,1-2H3	9.65161	7.4357	6.37195	7.45697
Test	M1335	86-50-0	InChI=1S/C10H12N3O3PS2/c1-15-17(18,16-2)19-7-13-10(14)8-5-3-4-6-9(8)11-12-13/h3-6H,7H2,1-2H3	3.01454	8.02228	6.566	7.26394
Test	M1336	1825-21-4	InChI=1S/C7H3Cl5O/c1-13-7-5(11)3(9)2(8)4(10)6(7)12/h1H3	27.2361	7.01258	6.13894	6.91315
Test	M1337	55-38-9	InChI=1S/C10H15O3PS2/c1-8-7-9(5-6-10(8)16-4)13-14(15,11-2)12-3/h5-7H,1-4H3	25.4198	7.03939	6.68779	7.5383
Test	M1338	50-29-3	InChI=1S/C14H9Cl5/c15-11-5-1-9(2-6-11)13(14(17,18)19)10-3-7-12(16)8-4-10/h1-8,13H	3.44966	8.01182	6.92145	7.75063
Test	M1339	66230-04-4	InChI=1S/C25H22ClNO3/c1-17(2)24(18-11-13-20(26)14-12-18)25(28)30-23(16-27)19-7-6-10-22(15-19)29-21-8-4-3-5-9-21/h3-15,17,23-24H,1-2H3/t23-,24+/m1/s1	1.09938	8.582	6.93135	8.44016
Test	M1340	67375-30-8	InChI=1S/C22H19Cl2NO3/c1-22(2)17(12-19(23)24)20(22)21(26)28-18(13-25)14-7-6-10-16(11-14)27-15-8-4-3-5-9-15/h3-12,17-18,20H,1-2H3/t17-,18-,20+/m1/s1	0.330042	9.10083	6.98024	8.92402
Test	M1341	68359-37-5	InChI=1S/C22H18Cl2FNO3/c1-22(2)15(11-19(23)24)20(22)21(27)29-18(12-26)13-8-9-16(25)17(10-13)28-14-6-4-3-5-7-14/h3-11,15,18,20H,1-2H3/t15-,18+,20+/m1/s1	0.375696	9.06294	7.05185	8.89261
Test	M1342	101-20-2	InChI=1S/C13H9Cl3N2O/c14-8-1-3-9(4-2-8)17-13(19)18-10-5-6-11(15)12(16)7-10/h1-7H,(H2,17,18,19)	10.6241	7.47282	5.99835	6.51559
Test	M1343	107-21-1	InChI=1S/C2H6O2/c3-1-2-4/h3-4H,1-2H2	4.06535e+07	0.183769	1.63432	0.956619
Test	M1344	33820-53-0	InChI=1S/C15H23N3O4/c1-5-7-16(8-6-2)15-13(17(19)20)9-12(11(3)4)10-14(15)18(21)22/h9-11H,5-8H2,1-4H3	26.0465	7.07472	6.14807	7.00812
Test	M1345	3689-24-5	InChI=1S/C8H20O5P2S2/c1-5-9-14(16,10-6-2)13-15(17,11-7-3)12-8-4/h5-8H2,1-4H3	1.11409	8.46136	8.21735	8.10726
Test	M1346	72-43-5	InChI=1S/C16H15Cl3O2/c1-20-13-7-3-11(4-8-13)15(16(17,18)19)12-5-9-14(21-2)10-6-12/h3-10,15H,1-2H3	31.34	7.04253	6.3572	7.05947
Test	M1347	22431-62-5	InChI=1S/C24H28O3/c1-24(2)21(14-18-10-6-7-11-18)22(24)23(25)27-16-19-13-20(26-15-19)12-17-8-4-3-5-9-17/h3-5,8-9,13-15,21-22H,6-7,10-12,16H2,1-2H3/t21-,22+/m0/s1	2.50667	8.16257	6.42387	7.06328
Test	M1348	112-27-6	InChI=1S/C6H14O4/c7-1-3-9-5-6-10-4-2-8/h7-8H,1-6H2	4.35353e+07	0.537751	1.72559	1.51715
Test	M1349	NA	InChI=1S/C16H26O3S/c1-2-3-4-5-6-7-8-9-11-15-12-10-13-16(14-15)20(17,18)19/h10,12-14H,2-9,11H2,1H3,(H,17,18,19)/p-1	16659.3	4.25173	5.41243	5.39736
Test	M1350	NA	InChI=1S/C17H28O3S/c1-2-3-4-5-6-7-8-9-10-12-16-13-11-14-17(15-16)21(18,19)20/h11,13-15H,2-10,12H2,1H3,(H,18,19,20)/p-1	9178.87	4.53061	5.62585	5.42554
Test	M1351	NA	InChI=1S/C18H30O3S/c1-2-3-4-5-6-7-8-9-10-11-13-17-14-12-15-18(16-17)22(19,20)21/h12,14-16H,2-11,13H2,1H3,(H,19,20,21)/p-1	4789.62	4.83223	5.84013	5.3412
Test	M1352	NA	InChI=1S/C19H32O3S/c1-2-3-4-5-6-7-8-9-10-11-12-14-18-15-13-16-19(17-18)23(20,21)22/h13,15-17H,2-12,14H2,1H3,(H,20,21,22)/p-1	2345.2	5.16068	6.05514	5.08777
Test	M1353	NA	InChI=1S/C20H34O3S/c1-2-3-4-5-6-7-8-9-10-11-12-13-15-19-16-14-17-20(18-19)24(21,22)23/h14,16-18H,2-13,15H2,1H3,(H,21,22,23)/p-1	1497.1	5.37319	6.27079	4.56441

## Sheet: Table S2
Table S2. The experimental and prediction results for the evaluation set
Mol. ID	CAS	optimized_Inchi	LC50(ug/L)	Exp. pLC50	Pred. pLC50 by ACO-SVM
E1	56-35-9	InChI=1S/6C4H9.O.2Sn/c6*1-3-4-2;;;/h6*1,3-4H2,2H3;;;	17.6952	7.52745	1.20463
E2	76-87-9	InChI=1S/3C6H5.H2O.Sn/c3*1-2-4-6-5-3-1;;/h3*1-5H;1H2;/q;;;;+1/p-1	16.4996	7.34722	2.49288
E3	78-40-0	InChI=1S/C6H15O4P/c1-4-8-11(7,9-5-2)10-6-3/h4-6H2,1-3H3	350001	2.71637	5.69739
E4	78-97-7	InChI=1S/C3H5NO/c1-3(5)2-4/h3,5H,1H3/t3-/m1/s1	2500	4.45379	2.26858
E5	93-68-5	InChI=1S/C11H13NO2/c1-8-5-3-4-6-10(8)12-11(14)7-9(2)13/h3-6H,7H2,1-2H3,(H,12,14)	930998	2.3126	4.22791
E6	112-85-6	InChI=1S/C22H44O2/c1-2-3-4-5-6-7-8-9-10-11-12-13-14-15-16-17-18-19-20-21-22(23)24/h2-21H2,1H3,(H,23,24)	16	7.3281	1.34695
E7	117-80-6	InChI=1S/C10H4Cl2O2/c11-7-8(12)10(14)6-4-2-1-3-5(6)9(7)13/h1-4H	25	6.95817	4.11861
E8	119-38-0	InChI=1S/C10H17N3O2/c1-7(2)13-9(6-8(3)11-13)15-10(14)12(4)5/h6-7H,1-5H3	12.5	7.22791	4.81388
E9	123-31-9	InChI=1S/C6H6O2/c7-5-1-2-6(8)4-3-5/h1-4,7-8H	170.001	5.81138	3.25699
E10	315-18-4	InChI=1S/C12H18N2O2/c1-8-6-10(16-12(15)13-3)7-9(2)11(8)14(4)5/h6-7H,1-5H3,(H,13,15)	1.8	8.09163	3.87556
E11	540-88-5	InChI=1S/C6H12O2/c1-5(7)8-6(2,3)4/h1-4H3	4.72999e+06	1.39019	3.87604
E12	623-91-6	InChI=1S/C8H12O4/c1-3-11-7(9)5-6-8(10)12-4-2/h5-6H,3-4H2,1-2H3/b6-5-	5599.98	4.48779	3.58434
E13	919-86-8	InChI=1S/C6H15O3PS2/c1-4-11-5-6-12-10(7,8-2)9-3/h4-6H2,1-3H3	23	7.00054	6.90054
E14	2040-96-2	InChI=1S/C8H16/c1-2-5-8-6-3-4-7-8/h8H,2-7H2,1H3	3090.81	4.55997	4.65997
E15	2634-33-5	InChI=1S/C7H5NOS/c9-7-5-3-1-2-4-6(5)10-8-7/h1-4H,(H,8,9)	4400	4.53606	4.43606
E16	3740-92-9	InChI=1S/C10H6Cl2N2/c11-8-6-9(12)14-10(13-8)7-4-2-1-3-5-7/h1-6H	2200	5.0099	4.98241
E17	4291-63-8	InChI=1S/C10H12ClN5O3/c11-10-14-8(12)7-9(15-10)16(3-13-7)6-1-4(18)5(2-17)19-6/h3-6,17-18H,1-2H2,(H2,12,14,15)/t4-,5-,6+/m0/s1	233000	3.08853	3.02885
E18	13171-21-6	InChI=1S/C10H19ClNO5P/c1-6-12(7-2)10(13)9(11)8(3)17-18(14,15-4)16-5/h6-7H2,1-5H3	8	7.57358	6.75603
E19	13684-56-5	InChI=1S/C16H16N2O4/c1-2-21-15(19)18-13-9-6-10-14(11-13)22-16(20)17-12-7-4-3-5-8-12/h3-11H,2H2,1H3,(H,17,20)(H,18,19)	1165	5.41124	5.43179
E20	13952-84-6	InChI=1S/C4H11N/c1-3-4(2)5/h4H,3,5H2,1-2H3/t4-/m0/s1	40400	3.25775	3.15775
E21	15299-99-7	InChI=1S/C17H21NO2/c1-4-18(5-2)17(19)13(3)20-16-12-8-10-14-9-6-7-11-15(14)16/h6-13H,4-5H2,1-3H3/t13-/m0/s1	14300	4.2782	4.3782
E22	16974-11-1	InChI=1S/C14H26O2/c1-3-4-5-6-7-8-9-10-11-12-13-16-14(2)15/h4-5H,3,6-13H2,1-2H3/b5-4+	2600	4.93982	6.11257
E23	22248-79-9	InChI=1S/C10H9Cl4O4P/c1-16-19(15,17-2)18-10(5-11)6-3-8(13)9(14)4-7(6)12/h3-5H,1-2H3/b10-5+	2	8.26241	8.16241
E24	35400-43-2	InChI=1S/C12H19O2PS3/c1-4-10-18-15(16,13-5-2)14-11-6-8-12(17-3)9-7-11/h6-9H,4-5,10H2,1-3H3/t15-/m0/s1	0.83	8.58938	8.47849
E25	35597-43-4	InChI=1S/C11H22N3O6P/c1-6(9(15)14-7(2)11(17)18)13-10(16)8(12)4-5-21(3,19)20/h6-8H,4-5,12H2,1-3H3,(H,13,16)(H,14,15)(H,17,18)(H,19,20)/t6-,7-,8-/m0/s1	1e+06	2.50958	2.47012
E26	60168-88-9	InChI=1S/C17H12Cl2N2O/c18-14-7-5-12(6-8-14)17(22,13-9-20-11-21-10-13)15-3-1-2-4-16(15)19/h1-11,22H/t17-/m1/s1	5950	4.74557	4.1618
E27	66063-05-6	InChI=1S/C19H21ClN2O/c20-16-12-10-15(11-13-16)14-22(18-8-4-5-9-18)19(23)21-17-6-2-1-3-7-17/h1-3,6-7,10-13,18H,4-5,8-9,14H2,(H,21,23)	270	6.08562	5.06569
E28	73250-68-7	InChI=1S/C16H14N2O2S/c1-18(12-7-3-2-4-8-12)15(19)11-20-16-17-13-9-5-6-10-14(13)21-16/h2-10H,11H2,1H3	1810	5.21706	4.5887
E29	74222-97-2	InChI=1S/C15H16N4O5S/c1-9-8-10(2)17-14(16-9)18-15(21)19-25(22,23)12-7-5-4-6-11(12)13(20)24-3/h4-8H,1-3H3,(H2,16,17,18,19,21)	12500	4.46464	4.10304
E30	79617-96-2	InChI=1S/C17H17Cl2N/c1-20-17-9-7-12(13-4-2-3-5-14(13)17)11-6-8-15(18)16(19)10-11/h2-6,8,10,12,17,20H,7,9H2,1H3/t12-,17-/m1/s1	1300	5.3721	5.4721
E31	83657-17-4	InChI=1S/C15H18ClN3O/c1-15(2,3)14(20)13(19-10-17-9-18-19)8-11-4-6-12(16)7-5-11/h4-10,14,20H,1-3H3/b13-8+/t14-/m1/s1	10000	4.46505	4.40348
E32	102851-06-9	InChI=1S/C26H22ClF3N2O3/c1-16(2)24(32-22-12-11-18(14-21(22)27)26(28,29)30)25(33)35-23(15-31)17-7-6-10-20(13-17)34-19-8-4-3-5-9-19/h3-14,16,23-24,32H,1-2H3/t23-,24-/m0/s1	39.475	7.10517	7.47616
E33	112226-61-6	InChI=1S/C18H19ClN2O2/c1-18(2,3)21(17(23)14-7-5-4-6-8-14)20-16(22)13-9-11-15(19)12-10-13/h4-12H,1-3H3,(H,20,22)	3400	4.9881	5.0881
E34	117671-01-9	InChI=1S/C7H10N2O4S2/c1-2-14(10,11)6-4-3-5-9-7(6)15(8,12)13/h3-5H,2H2,1H3,(H2,8,12,13)	184000	3.13363	3.23363
E35	153233-91-1	InChI=1S/C21H23F2NO2/c1-5-25-18-11-13(21(2,3)4)9-10-14(18)17-12-26-20(24-17)19-15(22)7-6-8-16(19)23/h6-11,17H,5,12H2,1-4H3/t17-/m1/s1	7.10001	7.70433	7.31567
E36	57-74-9	InChI=1S/C10H6Cl8/c11-3-1-2-4(5(3)12)9(16)7(14)6(13)8(2,15)10(9,17)18/h2-5H,1H2/t2-,3-,4-,5+,8-,9+/m1/s1	98.2991	6.62	6.96848
E37	58-89-9	InChI=1S/C6H6Cl6/c7-1-2(8)4(10)6(12)5(11)3(1)9/h1-6H/t1-,2-,3-,4+,5+,6+	1526.92	5.27982	5.35952
E38	72-20-8	InChI=1S/C12H8Cl6O/c13-8-9(14)11(16)5-3-1-2(6-7(3)19-6)4(5)10(8,15)12(11,17)18/h2-7H,1H2/t2-,3+,4+,5-,6-,7+,10+,11-	112.405	6.53004	6.264
E39	115-29-7	InChI=1S/C9H6Cl6O3S/c10-5-6(11)8(13)4-2-18-19(16)17-1-3(4)7(5,12)9(8,14)15/h3-4H,1-2H2/t3-,4+,7-,8+,19+	370.829	6.04034	5.76262
E40	138-86-3	InChI=1S/C10H16/c1-8(2)10-6-4-9(3)5-7-10/h4,10H,1,5-7H2,2-3H3/t10-/m1/s1	31.2094	6.64	5.27311
E41	506-77-4	InChI=1S/CClN/c2-1-3	42.259	6.16275	3.35327
E42	586-62-9	InChI=1S/C10H16/c1-8(2)10-6-4-9(3)5-7-10/h4H,5-7H2,1-3H3	2543.4	4.72887	4.82775
E43	959-98-8	InChI=1S/C9H6Cl6O3S/c10-5-6(11)8(13)4-2-18-19(16)17-1-3(4)7(5,12)9(8,14)15/h3-4H,1-2H2/t3-,4+,7+,8?,19+/m0/s1	865.959	5.67202	5.76262
E44	3483-12-3	InChI=1S/C4H10O2S2/c5-3(1-7)4(6)2-8/h3-8H,1-2H2/t3-,4?/m1/s1	26902.9	3.75843	3.65686
E45	5289-74-7	InChI=1S/C27H44O7/c1-23(2,32)9-8-22(31)26(5,33)21-7-11-27(34)16-12-18(28)17-13-19(29)20(30)14-24(17,3)15(16)6-10-25(21,27)4/h12,15,17,19-22,29-34H,6-11,13-14H2,1-5H3/t15?,17-,19-,20+,21+,22+,24-,25+,26+,27?/m1/s1	2462.15	5.2905	3.65298
E46	11141-17-6	InChI=1S/C35H44O16/c1-8-15(2)24(38)49-18-12-19(48-16(3)36)32(26(39)43-6)13-46-21-22(32)31(18)14-47-34(42,27(40)44-7)25(31)29(4,23(21)37)35-20-11-17(30(35,5)51-35)33(41)9-10-45-28(33)50-20/h8-10,17-23,25,28,37,41-42H,11-14H2,1-7H3/b15-8+/t17-,18-,19+,20+,21-,22-,23-,25-,28-,29+,30-,31-,32+,33+,34+,35-/m0/s1	624.838	6.062	2.73861
E47	35723-83-2	InChI=1S/C27H44O6/c1-15(2)6-7-23(31)26(5,32)22-9-11-27(33)17-12-19(28)18-13-20(29)21(30)14-24(18,3)16(17)8-10-25(22,27)4/h12,15-16,18,20-23,29-33H,6-11,13-14H2,1-5H3/t16-,18+,20-,21+,22+,23-,24-,25+,26-,27-/m1/s1	321.396	6.16007	3.80254
E48	98886-44-3	InChI=1S/C9H18NO3PS2/c1-4-8(3)16-14(12,13-5-2)10-6-7-15-9(10)11/h8H,4-7H2,1-3H3/t8-,14-/m1/s1	520.458	5.73593	5.94273
E49	960003-93-4	InChI=1S/C9H18NO3PS2/c1-4-8(3)16-14(12,13-5-2)10-6-7-15-9(10)11/h8H,4-7H2,1-3H3/t8-,14+/m1/s1	679.705	5.62	6.11731
E50	60207-90-1	InChI=1S/C15H17Cl2N3O2/c1-2-3-12-7-21-15(22-12,8-20-10-18-9-19-20)13-5-4-11(16)6-14(13)17/h4-6,9-10,12H,2-3,7-8H2,1H3/t12-,15+/m1/s1	6722.25	4.70679	4.93008
E51	75-25-2	InChI=1S/CHBr3/c2-1(3)4/h1H	45994.7	3.73995	3.8399
E52	598-16-3	InChI=1S/C2HBr3/c3-1-2(4)5/h1H	12391.4	4.3297	4.4549
E53	5436-43-1	InChI=1S/C12H6Br4O/c13-7-1-3-11(9(15)5-7)17-12-4-2-8(14)6-10(12)16/h1-6H	91.9642	6.72283	6.62266
E54	101-55-3	InChI=1S/C12H9BrO/c13-10-6-8-12(9-7-10)14-11-4-2-1-3-5-11/h1-9H	250.722	5.99719	5.4546
E55	4180-23-8	InChI=1S/C10H12O/c1-3-4-9-5-7-10(11-2)8-6-9/h3-8H,1-2H3/b4-3+	6.82109	7.337	4.3742
E56	77-73-6	InChI=1S/C10H12/c1-2-9-7-4-5-8(6-7)10(9)3-1/h1-2,4-5,7-10H,3,6H2/t7-,8+,9-,10+/m1/s1	10500.8	4.10002	4.20005
E57	110-83-8	InChI=1S/C6H10/c1-2-4-6-5-3-1/h1-2H,3-6H2	9404.83	3.94122	3.84145
E58	287-92-3	InChI=1S/C5H10/c1-2-4-5-3-1/h1-5H2	10887.3	3.809	3.7651
E59	110-82-7	InChI=1S/C6H12/c1-2-4-6-5-3-1/h1-6H2	3846.83	4.34	4.20448
E60	110-89-4	InChI=1S/C5H11N/c1-2-4-6-5-3-1/h6H,1-5H2	10004	3.93	2.84281
E61	107-13-1	InChI=1S/C3H3N/c1-2-3-4/h2H,1H2	8803.1	3.78015	3.68031
E62	100-42-5	InChI=1S/C8H8/c1-2-8-6-4-3-5-7-8/h2-7H,1H2	17612.5	3.77183	4.24556
E63	74-83-9	InChI=1S/CH3Br/c1-2/h1H3	2407.67	4.59585	4.61371
E64	67-64-1	InChI=1S/C3H6O/c1-3(2)4/h1-2H3	9.61716e+06	0.780973	2.42599
E65	123-54-6	InChI=1S/C5H8O2/c1-4(6)3-5(2)7/h3H2,1-2H3	47594.4	3.32295	3.15405
E66	81-81-2	InChI=1S/C19H16O4/c1-12(20)11-15(13-7-3-2-4-8-13)17-18(21)14-9-5-6-10-16(14)23-19(17)22/h2-10,15,21H,11H2,1H3/t15-/m1/s1	149764	3.31361	4.12046
E67	103-90-2	InChI=1S/C8H9NO2/c1-6(10)9-7-2-4-8(11)5-3-7/h2-5,11H,1H3,(H,9,10)	15626.7	3.98558	3.97996
E68	5417-35-6	InChI=1S/C8H14O2/c1-7(2)8-9-5-3-4-6-10-8/h3-4,7-8H,5-6H2,1-2H3	760129	2.272	3.81732
E69	35723-83-2	InChI=1S/C39H81N/c1-37(2)31-25-19-13-7-10-16-22-28-34-40(35-29-23-17-11-8-14-20-26-32-38(3)4)36-30-24-18-12-9-15-21-27-33-39(5)6/h37-39H,7-36H2,1-6H3	618.487	5.96	0.169863
E70	57157-80-9	InChI=1S/C26H55N/c1-25(2)21-17-13-9-5-7-11-15-19-23-27-24-20-16-12-8-6-10-14-18-22-26(3)4/h25-27H,5-24H2,1-4H3	110.853	6.537	1.74251
E71	15687-27-1	InChI=1S/C13H18O2/c1-9(2)8-11-4-6-12(7-5-11)10(3)13(14)15/h4-7,9-10H,8H2,1-3H3,(H,14,15)/t10-/m0/s1	9084.38	4.35616	4.39497
E72	67306-00-7	InChI=1S/C19H31N/c1-16(15-20-12-6-5-7-13-20)14-17-8-10-18(11-9-17)19(2,3)4/h8-11,16H,5-7,12-15H2,1-4H3/t16-/m1/s1	529.931	5.71267	5.80449
E73	67564-91-4	InChI=1S/C20H33NO/c1-15(12-21-13-16(2)22-17(3)14-21)11-18-7-9-19(10-8-18)20(4,5)6/h7-10,15-17H,11-14H2,1-6H3/t15-,16+,17+/m1/s1	2319.78	5.11669	5.31752
E74	1717-00-6	InChI=1S/C2H3Cl2F/c1-2(3,4)5/h1H3	31087.1	3.57542	3.554
E75	2303-17-5	InChI=1S/C10H16Cl3NOS/c1-6(2)14(7(3)4)10(15)16-5-8(11)9(12)13/h6-7H,5H2,1-4H3	135.313	6.35248	5.8132
E76	108-18-9	InChI=1S/C6H15N/c1-5(2)7-6(3)4/h5-7H,1-4H3	448961	2.35293	2.98191
E77	5964-62-5	InChI=1S/C32H34N4O4S/c1-19(2)27-17-29(21(5)15-31(27)37)35-33-23-7-11-25(12-8-23)41(39,40)26-13-9-24(10-14-26)34-36-30-18-28(20(3)4)32(38)16-22(30)6/h7-20,37-38H,1-6H3/b35-33+,36-34+	2072.09	5.44	3.03896
E78	79-94-7	InChI=1S/C15H12Br4O2/c1-15(2,7-3-9(16)13(20)10(17)4-7)8-5-11(18)14(21)12(19)6-8/h3-6,20-21H,1-2H3	7897.61	4.838	4.91302
E79	3547-4-4	InChI=1S/C14H12Cl2/c1-10(11-2-6-13(15)7-3-11)12-4-8-14(16)9-5-12/h2-10H,1H3	34.9143	6.85693	6.5396
E80	140-66-9	InChI=1S/C14H22O/c1-13(2,3)10-14(4,5)11-6-8-12(15)9-7-11/h6-9,15H,10H2,1-5H3	90.0319	6.36015	5.65246
E81	80-05-7	InChI=1S/C15H16O2/c1-15(2,11-3-7-13(16)8-4-11)12-5-9-14(17)10-6-12/h3-10,16-17H,1-2H3	9232.54	4.39316	4.30122
E82	578-54-1	InChI=1S/C8H11N/c1-2-7-5-3-4-6-8(7)9/h3-6H,2,9H2,1H3	8037.38	4.17832	3.90117
E83	78-59-1	InChI=1S/C9H14O/c1-7-4-8(10)6-9(2,3)5-7/h4H,5-6H2,1-3H3	120048	3.06117	3.78875
E84	99-86-5	InChI=1S/C10H16/c1-8(2)10-6-4-9(3)5-7-10/h4,6,8H,5,7H2,1-3H3	1850.48	4.867	4.76636
E85	80-56-8	InChI=1S/C10H16/c1-7-4-5-8-6-9(7)10(8,2)3/h4,8-9H,5-6H2,1-3H3/t8-,9-/m0/s1	40953	3.522	4.36149
E86	709-98-8	InChI=1S/C9H9Cl2NO/c1-2-9(13)12-6-3-4-7(10)8(11)5-6/h3-5H,2H2,1H3,(H,12,13)	3301.62	4.81989	5.11159
E87	79-09-4	InChI=1S/C3H6O2/c1-2-3(4)5/h2H2,1H3,(H,4,5)	45208.3	3.21447	2.71465
E88	149-31-5	InChI=1S/C6H14O2/c1-3-6(8)5(2)4-7/h5-8H,3-4H2,1-2H3/t5-,6+/m0/s1	6.26534e+06	1.27558	2.01703
E89	78-99-9	InChI=1S/C3H6Cl2/c1-2-3(4)5/h3H,2H2,1H3	24712.8	3.6601	3.5913
E90	88-85-7	InChI=1S/C10H12N2O5/c1-3-6(2)8-4-7(11(14)15)5-9(10(8)13)12(16)17/h4-6,13H,3H2,1-2H3/t6-/m1/s1	240.213	6	5.39873
E91	3766-81-2	InChI=1S/C12H17NO2/c1-4-9(2)10-7-5-6-8-11(10)15-12(14)13-3/h5-9H,4H2,1-3H3,(H,13,14)/t9-/m1/s1	99.6026	6.31826	4.98847
E92	50-06-6	InChI=1S/C12H12N2O3/c1-2-12(8-6-4-3-5-7-8)9(15)13-11(17)14-10(12)16/h3-7H,2H2,1H3,(H2,13,14,15,16,17)	1.46193e+06	2.201	3.36958
E93	123-38-6	InChI=1S/C3H6O/c1-2-3-4/h3H,2H2,1H3	88924.2	2.815	2.83092
E94	107-92-6	InChI=1S/C4H8O2/c1-2-3-4(5)6/h2-3H2,1H3,(H,5,6)	60976.9	3.15984	2.56202
E95	51333-22-3	InChI=1S/C25H34O6/c1-4-5-21-30-20-11-17-16-7-6-14-10-15(27)8-9-23(14,2)22(16)18(28)12-24(17,3)25(20,31-21)19(29)13-26/h8-10,16-18,20-22,26,28H,4-7,11-13H2,1-3H3/t16-,17+,18-,20-,21+,22-,23+,24-,25+/m0/s1	20508.6	4.32207	3.99185
E96	109-66-0	InChI=1S/C5H12/c1-3-5-4-2/h3-5H2,1-2H3	7976.37	3.95642	4.03324
E97	109-52-4	InChI=1S/C5H10O2/c1-2-3-4-5(6)7/h2-4H2,1H3,(H,6,7)	44894.1	3.35697	2.68935
E98	149-57-5	InChI=1S/C8H16O2/c1-3-5-6-7(4-2)8(9)10/h7H,3-6H2,1-2H3,(H,9,10)/t7-/m0/s1	119949	3.08	3.96576
E99	104-76-7	InChI=1S/C8H18O/c1-3-5-6-8(4-2)7-9/h8-9H,3-7H2,1-2H3/t8-/m1/s1	99932	3.115	3.84956
E100	103-23-1	InChI=1S/C22H42O4/c1-5-9-13-19(7-3)17-25-21(23)15-11-12-16-22(24)26-18-20(8-4)14-10-6-2/h19-20H,5-18H2,1-4H3/t19-,20+	659.819	5.74944	6.03001
E101	1241-94-7	InChI=1S/C20H27O4P/c1-3-5-12-18(4-2)17-22-25(21,23-19-13-8-6-9-14-19)24-20-15-10-7-11-16-20/h6-11,13-16,18H,3-5,12,17H2,1-2H3/t18-/m0/s1	150.369	6.38203	6.26393
E102	110-54-3	InChI=1S/C6H14/c1-3-5-6-4-2/h3-6H2,1-2H3	3894.25	4.34496	4.44998
E103	96829-58-2	InChI=1S/C29H53NO5/c1-5-7-9-11-12-13-14-15-16-18-24(34-29(33)26(30-22-31)20-23(3)4)21-27-25(28(32)35-27)19-17-10-8-6-2/h22-27H,5-21H2,1-4H3,(H,30,31)/t24-,25-,26+,27-/m1/s1	7002.44	4.85	2.67971
E104	104-40-5	InChI=1S/C15H24O/c1-2-3-4-5-6-7-8-9-14-10-12-15(16)13-11-14/h10-13,16H,2-9H2,1H3	147.079	6.17556	5.86771
E105	1806-26-4	InChI=1S/C14H22O/c1-2-3-4-5-6-7-8-13-9-11-14(15)12-10-13/h9-12,15H,2-8H2,1H3	90.0637	6.36	5.53603
E106	26530-20-1	InChI=1S/C11H19NOS/c1-2-3-4-5-6-7-9-12-11(13)8-10-14-12/h8,10H,2-7,9H2,1H3	179.959	6.0739	5.06378
E107	111-70-6	InChI=1S/C7H16O/c1-2-3-4-5-6-7-8/h8H,2-7H2,1H3	66028.6	3.24548	3.48985
E108	1114-71-2	InChI=1S/C10H21NOS/c1-4-7-8-11(6-3)10(12)13-9-5-2/h4-9H2,1-3H3	6363.53	4.50454	4.63738
E109	592-82-5	InChI=1S/C5H9NS/c1-2-3-4-6-5-7/h2-4H2,1H3	429.492	5.42849	4.18644
E110	55406-53-6	InChI=1S/C8H12INO2/c1-2-3-6-10-8(11)12-7-4-5-9/h2-3,6-7H2,1H3,(H,10,11)	39.9442	6.84739	6.22368
E111	1516-32-1	InChI=1S/C5H12N2S/c1-2-3-4-7-5(6)8/h2-4H2,1H3,(H3,6,7,8)	18688.8	3.84974	3.74948
E112	84-74-2	InChI=1S/C16H22O4/c1-3-5-11-19-15(17)13-9-7-8-10-14(13)16(18)20-12-6-4-2/h7-10H,3-6,11-12H2,1-2H3	3543.1	4.8952	4.9948
E113	85-68-7	InChI=1S/C19H20O4/c1-2-3-13-22-18(20)16-11-7-8-12-17(16)19(21)23-14-15-9-5-4-6-10-15/h4-12H,2-3,13-14H2,1H3	1908.38	5.21399	5.33038
E114	142-96-1	InChI=1S/C8H18O/c1-3-5-7-9-8-6-4-2/h3-8H2,1-2H3	25992	3.69987	3.79973
E115	51-03-6	InChI=1S/C19H30O5/c1-3-5-7-20-8-9-21-10-11-22-14-17-13-19-18(23-15-24-19)12-16(17)6-4-2/h12-13H,3-11,14-15H2,1-2H3	1769.61	5.2816	5.1724
E116	2528-36-1	InChI=1S/C14H23O4P/c1-3-5-12-16-19(15,17-13-6-4-2)18-14-10-8-7-9-11-14/h7-11H,3-6,12-13H2,1-2H3	259.913	6.042	5.99869
E117	104-51-8	InChI=1S/C10H14/c1-2-3-7-10-8-5-4-6-9-10/h4-6,8-9H,2-3,7H2,1H3	395.792	5.53034	5.34551
E118	759-94-4	InChI=1S/C9H19NOS/c1-4-7-10(8-5-2)9(11)12-6-3/h4-8H2,1-3H3	7009.33	4.43152	4.91497
E119	2556-42-5	InChI=1S/C14H28N2S4/c1-5-9-15(10-6-2)13(17)19-20-14(18)16(11-7-3)12-8-4/h5-12H2,1-4H3	229.369	6.1868	6.28561
E120	1582-09-8	InChI=1S/C13H16F3N3O4/c1-3-5-17(6-4-2)12-10(18(20)21)7-9(13(14,15)16)8-11(12)19(22)23/h7-8H,3-6H2,1-2H3	218.966	6.18503	5.85422
E121	24579-73-5	InChI=1S/C9H20N2O2/c1-4-8-13-9(12)10-6-5-7-11(2)3/h4-8H2,1-3H3,(H,10,12)	105935	3.24973	3.34947
E122	107-03-9	InChI=1S/C3H8S/c1-2-3-4/h4H,2-3H2,1H3	60.1091	6.10279	4.57528
E123	13194-48-4	InChI=1S/C8H19O2PS2/c1-4-7-12-11(9,10-6-3)13-8-5-2/h4-8H2,1-3H3	131.944	6.26403	6.99349
E124	54965-21-8	InChI=1S/C12H15N3O2S/c1-3-6-18-8-4-5-9-10(7-8)14-11(13-9)15-12(16)17-2/h4-5,7H,3,6H2,1-2H3,(H2,13,14,15,16)	23.9766	7.044	4.73074
E125	542-85-8	InChI=1S/C3H5NS/c1-2-4-3-5/h2H2,1H3	429.389	5.30738	5.05891
E126	105-55-5	InChI=1S/C5H12N2S/c1-3-6-5(8)7-4-2/h3-4H2,1-2H3,(H2,6,7,8)	192504	2.83688	2.93576
E127	2741-6-2	InChI=1S/C9H12N2S/c1-2-10-9(12)11-8-6-4-3-5-7-8/h3-7H,2H2,1H3,(H2,10,11,12)	80553.3	3.34984	3.87752
E128	122-34-9	InChI=1S/C7H12ClN5/c1-3-9-6-11-5(8)12-7(13-6)10-4-2/h3-4H2,1-2H3,(H2,9,10,11,12,13)	63069.2	3.5048	3.66898
E129	21725-46-2	InChI=1S/C9H13ClN6/c1-4-12-7-13-6(10)14-8(15-7)16-9(2,3)5-11/h4H2,1-3H3,(H2,12,13,14,15,16)	85.9931	6.447	3.59127
E130	64-17-5	InChI=1S/C2H6O/c1-2-3/h3H,2H2,1H3	1.16855e+07	0.595754	1.91323
E131	77501-63-4	InChI=1S/C19H15ClF3NO7/c1-3-29-17(25)10(2)30-18(26)13-9-12(5-6-15(13)24(27)28)31-16-7-4-11(8-14(16)20)19(21,22)23/h4-10H,3H2,1-2H3/t10-/m1/s1	4279.76	5.03301	6.7213
E132	105-53-3	InChI=1S/C7H12O4/c1-3-10-6(8)5-7(9)11-4-2/h3-5H2,1-2H3	202104	2.899	3.41693
E133	84-66-2	InChI=1S/C12H14O4/c1-3-15-11(13)9-7-5-6-8-10(9)12(14)16-4-2/h5-8H,3-4H2,1-2H3	54837	3.60774	3.7308
E134	20485-39-6	InChI=1S/C7H9NO3/c1-3-10-7(9)6-5(2)8-4-11-6/h4H,3H2,1-2H3	333238	2.668	3.16167
E135	60-29-7	InChI=1S/C4H10O/c1-3-5-4-2/h3-4H2,1-2H3	1.38021e+06	1.73	3.22614
E136	311-45-5	InChI=1S/C10H14NO6P/c1-3-15-18(14,16-4-2)17-10-7-5-9(6-8-10)11(12)13/h5-8H,3-4H2,1-2H3	0.196951	9.14528	5.53077
E137	786-19-6	InChI=1S/C11H16ClO2PS3/c1-3-13-15(16,14-4-2)18-9-17-11-7-5-10(12)6-8-11/h5-8H,3-4,9H2,1-2H3	101.957	6.5267	8.20171
E138	59-06-3	InChI=1S/C12H15NO4/c1-4-17-11-7-9(13-8(2)14)5-6-10(11)12(15)16-3/h5-7H,4H2,1-3H3,(H,13,14)	200503	3.07309	3.73519
E139	91-53-2	InChI=1S/C14H19NO/c1-5-16-11-6-7-13-12(8-11)10(2)9-14(3,4)15-13/h6-9,15H,5H2,1-4H3	2000.1	5.03602	4.93355
E140	75-08-1	InChI=1S/C2H6S/c1-2-3/h3H,2H2,1H3	170.172	5.56244	5.306
E141	2212-67-1	InChI=1S/C9H17NOS/c1-2-12-9(11)10-7-5-3-4-6-8-10/h2-8H2,1H3	10873.8	4.23616	4.02207
E142	114-07-8	InChI=1S/C37H67NO13/c1-14-25-37(10,45)30(41)20(4)27(39)18(2)16-35(8,44)32(51-34-28(40)24(38(11)12)15-19(3)47-34)21(5)29(22(6)33(43)49-25)50-26-17-36(9,46-13)31(42)23(7)48-26/h18-26,28-32,34,40-42,44-45H,14-17H2,1-13H3/t18-,19-,20-,21-,22-,23+,24-,25+,26+,28+,29-,30+,31-,32+,34+,35-,36-,37+/m0/s1	207854	3.54789	4.28135
E143	83905-01-5	InChI=1S/C38H72N2O12/c1-15-27-38(10,46)31(42)24(6)40(13)19-20(2)17-36(8,45)33(52-35-29(41)26(39(11)12)16-21(3)48-35)22(4)30(23(5)34(44)50-27)51-28-18-37(9,47-14)32(43)25(7)49-28/h20-33,35,41-43,45-46H,15-19H2,1-14H3/t20-,21+,22-,23+,24-,25-,26+,27+,28+,29-,30+,31-,32-,33-,35-,36+,37+,38+/m1/s1	119959	3.79544	3.48576
E144	81103-11-9	InChI=1S/C38H69NO13/c1-15-26-38(10,45)31(42)21(4)28(40)19(2)17-37(9,47-14)33(52-35-29(41)25(39(11)12)16-20(3)48-35)22(5)30(23(6)34(44)50-26)51-27-18-36(8,46-13)32(43)24(7)49-27/h19-27,29-33,35,41-43,45H,15-18H2,1-14H3/t19-,20+,21+,22-,23+,24-,25-,26+,27-,29-,30+,31-,32+,33+,35-,36-,37-,38-/m0/s1	18701.4	4.602	3.65117
E145	112410-23-8	InChI=1S/C22H28N2O2/c1-7-17-8-10-18(11-9-17)20(25)23-24(22(4,5)6)21(26)19-13-15(2)12-16(3)14-19/h8-14H,7H2,1-6H3,(H,23,25)	10591.4	4.52217	5.20094
E146	589-16-2	InChI=1S/C8H11N/c1-2-7-3-5-8(9)6-4-7/h3-6H,2,9H2,1H3	89.9161	6.12959	4.01625
E147	104-90-5	InChI=1S/C8H11N/c1-3-8-5-4-7(2)9-6-8/h4-6H,3H2,1-2H3	39817.2	3.48336	4.09623
E148	632-22-4	InChI=1S/C5H12N2O/c1-6(2)5(8)7(3)4/h1-4H3	2.90558e+06	1.60183	2.71502
E149	23103-98-2	InChI=1S/C11H18N4O2/c1-7-8(2)12-10(14(3)4)13-9(7)17-11(16)15(5)6/h1-6H3	19.4413	7.08837	3.47695
E150	2782-91-4	InChI=1S/C5H12N2S/c1-6(2)5(8)7(3)4/h1-4H3	772516	2.23341	2.71702
E151	6972-05-0	InChI=1S/C3H8N2S/c1-5(2)3(4)6/h1-2H3,(H2,4,6)	42121.7	3.39325	3.49451
E152	97-74-5	InChI=1S/C6H12N2S3/c1-7(2)5(9)11-6(10)8(3)4/h1-4H3	2894.78	4.85722	4.95643
E153	137-26-8	InChI=1S/C6H12N2S4/c1-7(2)5(9)11-12-6(10)8(3)4/h1-4H3	225.162	6.0285	6.1
E154	15263-53-3	InChI=1S/C7H15N3O2S2/c1-10(2)5(3-13-6(8)11)4-14-7(9)12/h5H,3-4H2,1-2H3,(H2,8,11)(H2,9,12)	9.96989	7.37669	4.20825
E155	680-31-9	InChI=1S/C6H18N3OP/c1-7(2)11(10,8(3)4)9(5)6/h1-6H3	6.66395e+06	1.42961	2.66234
E156	60-54-8	InChI=1S/C22H24N2O8/c1-21(31)8-5-4-6-11(25)12(8)16(26)13-9(21)7-10-15(24(2)3)17(27)14(20(23)30)19(29)22(10,32)18(13)28/h4-6,9-10,15,25,27-28,31-32H,7H2,1-3H3,(H2,23,30)/t9-,10+,15-,21+,22+/m1/s1	165.123	6.43	3.16244
E157	4104-75-0	InChI=1S/C8H10N2S/c1-10(8(9)11)7-5-3-2-4-6-7/h2-6H,1H3,(H2,9,11)	90051.7	3.26625	3.35426
E158	82419-36-1	InChI=1S/C18H20FN3O4/c1-10-9-26-17-14-11(16(23)12(18(24)25)8-22(10)14)7-13(19)15(17)21-5-3-20(2)4-6-21/h7-8,10H,3-6,9H2,1-2H3,(H,24,25)/t10-/m1/s1	47309.6	3.883	3.64646
E159	60-51-5	InChI=1S/C5H12NO3PS2/c1-6-5(7)4-12-10(11,8-2)9-3/h4H2,1-3H3,(H,6,7)	1849.75	5.09321	5.02632
E160	23135-22-0	InChI=1S/C7H13N3O3S/c1-8-7(12)13-9-5(14-4)6(11)10(2)3/h1-4H3,(H,8,12)/b9-5-	1007.97	5.33752	4.07763
E161	1646-88-4	InChI=1S/C7H14N2O4S/c1-7(2,14(4,11)12)5-9-13-6(10)8-3/h5H,1-4H3,(H,8,10)/b9-5+	279.906	5.89985	4.2097
E162	116-06-3	InChI=1S/C7H14N2O2S/c1-7(2,12-4)5-9-11-6(10)8-3/h5H,1-4H3,(H,8,10)/b9-5+	477.5	5.60038	3.92524
E163	1563-66-2	InChI=1S/C12H15NO3/c1-12(2)7-8-5-4-6-9(10(8)16-12)15-11(14)13-3/h4-6H,7H2,1-3H3,(H,13,14)	63.5335	6.54188	4.87802
E164	22781-23-3	InChI=1S/C11H13NO4/c1-11(2)15-8-6-4-5-7(9(8)16-11)14-10(13)12-3/h4-6H,1-3H3,(H,12,13)	62.1121	6.55557	4.95308
E165	63-25-2	InChI=1S/C12H11NO2/c1-13-12(14)15-11-8-4-6-9-5-2-3-7-10(9)11/h2-8H,1H3,(H,13,14)	614.61	5.51507	4.15808
E166	598-52-7	InChI=1S/C2H6N2S/c1-4-2(3)5/h1H3,(H3,3,4,5)	9480.7	3.97811	3.87723
E167	2489-77-2	InChI=1S/C4H10N2S/c1-5-4(7)6(2)3/h1-3H3,(H,5,7)	768346	2.18706	2.85511
E168	100-61-8	InChI=1S/C7H9N/c1-8-7-5-3-2-4-6-7/h2-6,8H,1H3	174.391	5.78848	4.79019
E169	141517-21-7	InChI=1S/C20H19F3N2O4/c1-13(14-8-6-9-16(11-14)20(21,22)23)24-29-12-15-7-4-5-10-17(15)18(25-28-3)19(26)27-2/h4-11H,12H2,1-3H3/b24-13+,25-18+	375.349	6.03662	5.87205
E170	175013-18-0	InChI=1S/C19H18ClN3O4/c1-25-19(24)23(26-2)17-6-4-3-5-14(17)13-27-18-11-12-22(21-18)16-9-7-15(20)8-10-16/h3-12H,13H2,1-2H3	42.0092	6.96528	5.95982
E171	23564-05-8	InChI=1S/C12H14N4O4S2/c1-19-11(17)15-9(21)13-7-5-3-4-6-8(7)14-10(22)16-12(18)20-2/h3-6H,1-2H3,(H2,13,15,17,21)(H2,14,16,18,22)	13357.5	4.4088	4.40514
E172	13684-63-4	InChI=1S/C16H16N2O4/c1-11-5-3-6-12(9-11)18-16(20)22-14-8-4-7-13(10-14)17-15(19)21-2/h3-10H,1-2H3,(H,17,19)(H,18,20)	6692.19	4.652	5.65905
E173	131-11-3	InChI=1S/C10H10O4/c1-13-9(11)7-5-3-4-6-8(7)10(12)14-2/h3-6H,1-2H3	32988.6	3.76985	3.7348
E174	70630-17-0	InChI=1S/C15H21NO4/c1-10-7-6-8-11(2)14(10)16(13(17)9-19-4)12(3)15(18)20-5/h6-8,12H,9H2,1-5H3/t12-/m1/s1	58569.5	3.67845	3.79183
E175	107-98-2	InChI=1S/C4H10O2/c1-4(5)3-6-2/h4-5H,3H2,1-2H3/t4-/m1/s1	2.31647e+07	0.59	2.15586
E176	108-65-6	InChI=1S/C6H12O3/c1-5(4-8-3)9-6(2)7/h5H,4H2,1-3H3/t5-/m0/s1	390234	2.52977	3.02116
E177	20324-32-7	InChI=1S/C7H16O3/c1-6(8)4-10-7(2)5-9-3/h6-8H,4-5H2,1-3H3/t6-,7+/m1/s1	1.918e+06	1.888	2.01654
E178	52-68-6	InChI=1S/C4H8Cl3O4P/c1-10-12(9,11-2)3(8)4(5,6)7/h3,8H,1-2H3/t3-/m0/s1	25.4642	7.00474	5.38091
E179	10265-92-6	InChI=1S/C2H8NO2PS/c1-5-6(3,4)7-2/h1-2H3,(H2,3,4)/t6-/m1/s1	152.005	5.96776	5.06197
E180	2539-17-5	InChI=1S/C7H4Cl4O2/c1-13-7-5(11)3(9)2(8)4(10)6(7)12/h12H,1H3	195.657	6.12667	5.98237
E181	57057-83-7	InChI=1S/C7H5Cl3O2/c1-12-7-4(11)2-3(8)5(9)6(7)10/h2,11H,1H3	656.319	5.53981	5.51788
E182	83-66-9	InChI=1S/C12H16N2O5/c1-7-9(13(15)16)6-8(12(2,3)4)11(19-5)10(7)14(17)18/h6H,1-5H3	620.248	5.636	5.73171
E183	2668-24-8	InChI=1S/C7H5Cl3O2/c1-12-4-2-3(8)5(9)6(10)7(4)11/h2,11H,1H3	962.945	5.37333	5.47466
E184	104-94-9	InChI=1S/C7H9NO/c1-9-7-4-2-6(8)3-5-7/h2-5H,8H2,1H3	330.352	5.57146	4.14431
E185	19937-59-8	InChI=1S/C10H13ClN2O2/c1-13(2)10(14)12-7-4-5-9(15-3)8(11)6-7/h4-6H,1-3H3,(H,12,14)	173918	3.11887	3.64866
E186	73590-58-6	InChI=1S/C17H19N3O3S/c1-10-8-18-15(11(2)16(10)23-4)9-24(21)17-19-13-6-5-12(22-3)7-14(13)20-17/h5-8H,9H2,1-4H3,(H,19,20)/t24-/m0/s1	87971.6	3.594	3.60163
E187	536-90-3	InChI=1S/C7H9NO/c1-9-7-4-2-3-6(8)5-7/h2-5H,8H2,1H3	280.414	5.64264	4.12423
E188	150-19-6	InChI=1S/C7H8O2/c1-9-7-4-2-3-6(8)5-7/h2-5,8H,1H3	41102.8	3.48003	3.39203
E189	100-66-3	InChI=1S/C7H8O/c1-8-7-5-3-2-4-6-7/h2-6H,1H3	25527.6	3.62697	4.09012
E190	90-04-0	InChI=1S/C7H9NO/c1-9-7-5-3-2-4-6(7)8/h2-5H,8H2,1H3	12003.6	4.01113	4.11126
E191	90-05-1	InChI=1S/C7H8O2/c1-9-7-5-3-2-4-6(7)8/h2-5,8H,1H3	25942.9	3.67988	4.37641
E192	72956-09-3	InChI=1S/C24H26N2O4/c1-28-21-10-4-5-11-22(21)29-14-13-25-15-17(27)16-30-23-12-6-9-20-24(23)18-7-2-3-8-19(18)26-20/h2-12,17,25-27H,13-16H2,1H3/t17-/m1/s1	3532.06	5.061	3.89561
E193	28159-98-0	InChI=1S/C11H19N5S/c1-11(2,3)16-9-13-8(12-7-5-6-7)14-10(15-9)17-4/h7H,5-6H2,1-4H3,(H2,12,13,14,15,16)	6796.87	4.57144	4.49386
E194	30125-65-6	InChI=1S/C8H15N5S/c1-8(2,3)13-6-10-5(9)11-7(12-6)14-4/h1-4H3,(H3,9,10,11,12,13)	10995	4.2878	4.14998
E195	95-93-2	InChI=1S/C10H14/c1-7-5-9(3)10(4)6-8(7)2/h5-6H,1-4H3	476.223	5.45	4.17546
E196	95-36-3	InChI=1S/C9H12/c1-7-4-5-8(2)9(3)6-7/h4-6H,1-3H3	3547.12	4.53	3.99316
E197	105-67-9	InChI=1S/C8H10O/c1-6-3-4-8(9)7(2)5-6/h3-5,9H,1-2H3	3449.32	4.54921	4.03308
E198	106-42-3	InChI=1S/C8H10/c1-7-3-5-8(2)6-4-7/h3-6H,1-2H3	29883.7	3.55055	3.67882
E199	134308-13-7	InChI=1S/C14H11NO5/c1-8-2-4-9(5-3-8)13(17)10-6-11(15(19)20)14(18)12(16)7-10/h2-7,16,18H,1H3	19531.3	4.14582	4.06603
E200	99-87-6	InChI=1S/C10H14/c1-8(2)10-6-4-9(3)5-7-10/h4-8H,1-3H3	6484.3	4.31595	4.55768
E201	106-43-4	InChI=1S/C7H7Cl/c1-6-2-4-7(8)5-3-6/h2-5H,1H3	2523.41	4.70039	4.44973
E202	106-44-5	InChI=1S/C7H8O/c1-6-2-4-7(8)5-3-6/h2-5,8H,1H3	11242.6	3.98311	3.70639
E203	877-43-0	InChI=1S/C11H11N/c1-8-3-6-11-10(7-8)5-4-9(2)12-11/h3-7H,1-2H3	37943.3	3.61735	3.96749
E204	91-57-6	InChI=1S/C11H10/c1-9-6-7-10-4-2-3-5-11(10)8-9/h2-8H,1H3	1488.99	4.98	4.92829
E205	14315-14-1	InChI=1S/C9H8S/c1-7-2-3-9-8(6-7)4-5-10-9/h2-6H,1H3	13996.7	4.0249	4.64511
E206	108-38-3	InChI=1S/C8H10/c1-7-4-3-5-8(2)6-7/h3-6H,1-2H3	23601.9	3.65303	3.67882
E207	108-44-1	InChI=1S/C7H9N/c1-6-3-2-4-7(8)5-6/h2-5H,8H2,1H3	728.893	5.16734	3.52596
E208	108-39-4	InChI=1S/C7H8O/c1-6-3-2-4-7(8)5-6/h2-5,8H,1H3	18796.1	3.75991	3.74824
E209	90-12-0	InChI=1S/C11H10/c1-9-5-4-7-10-6-2-3-8-11(9)10/h2-8H,1H3	1633.35	4.93981	4.92829
E210	95-47-6	InChI=1S/C8H10/c1-7-5-3-4-6-8(7)2/h3-6H,1-2H3	15629.2	3.83205	3.67882
E211	95-48-7	InChI=1S/C7H8O/c1-6-4-2-3-5-7(6)8/h2-5,8H,1H3	9912.23	4.03781	4.23501
E212	3056-17-5	InChI=1S/C10H12N2O4/c1-6-4-12(10(15)11-9(6)14)8-3-2-7(5-13)16-8/h2-4,7-8,13H,5H2,1H3,(H,11,14,15)/t7-,8+/m1/s1	980396	2.35926	2.4795
E213	1455-18-1	InChI=1S/C9H8S/c1-7-6-10-9-5-3-2-4-8(7)9/h2-6H,1H3	2599.84	4.75597	4.3055
E214	75-35-4	InChI=1S/C2H2Cl2/c1-2(3)4/h1H2	48088.4	3.30448	3.43042
E215	3282-30-2	InChI=1S/C5H9ClO/c1-5(2,3)4(6)7/h1-3H3	320084	2.576	4.29062
E216	67-72-1	InChI=1S/C2Cl6/c3-1(4,5)2(6,7)8	3235.92	4.86427	5.37948
E217	76-01-7	InChI=1S/C2HCl5/c3-1(4)2(5,6)7/h1H	19641	4.01282	4.87259
E218	79-34-5	InChI=1S/C2H2Cl4/c3-1(4)2(5)6/h1-2H	48758.1	3.53687	3.76145
E219	306-83-2	InChI=1S/C2HCl2F3/c3-1(4)2(5,6)7/h1H	17001.8	3.954	3.93974
E220	56-23-5	InChI=1S/CCl4/c2-1(3,4)5	31998.1	3.6819	3.82462
E221	67-66-3	InChI=1S/CHCl3/c2-1(3)4/h1H	165224	2.85885	3.00202
E222	77-47-4	InChI=1S/C5Cl6/c6-1-2(7)4(9)5(10,11)3(1)8	48.7878	6.74749	6.42942
E223	60-57-1	InChI=1S/C12H8Cl6O/c13-8-9(14)11(16)5-3-1-2(6-7(3)19-6)4(5)10(8,15)12(11,17)18/h2-7H,1H2/t2-,3+,4+,5-,6+,7-,10+,11-	141.503	6.43006	6.264
E224	1031-07-8	InChI=1S/C9H6Cl6O4S/c10-5-6(11)8(13)4-2-19-20(16,17)18-1-3(4)7(5,12)9(8,14)15/h3-4H,1-2H2/t3-,4-,7-,8+/m0/s1	1666.43	5.40448	5.64545
E225	1024-57-3	InChI=1S/C10H5Cl7O/c11-3-1-2(4-5(3)18-4)9(15)7(13)6(12)8(1,14)10(9,16)17/h1-5H/t1-,2+,3-,4+,5-,8-,9+/m1/s1	240.051	6.21	6.11009
E226	76-44-8	InChI=1S/C10H5Cl7/c11-4-2-1-3-5(4)9(15)7(13)6(12)8(3,14)10(9,16)17/h1-5H/t3-,4+,5+,8-,9+/m0/s1	76.1011	6.69069	6.72497
E227	12789-03-6	InChI=1S/C10H6Cl8/c11-3-1-2-4(5(3)12)9(16)7(14)6(13)8(2,15)10(9,17)18/h2-5H,1H2/t2-,3-,4+,5+,8+,9-/m1/s1	66.3112	6.79096	6.96848
E228	79-01-6	InChI=1S/C2HCl3/c3-1-2(4)5/h1H	30504.3	3.63419	3.96328
E229	156-60-5	InChI=1S/C2H2Cl2/c3-1-2-4/h1-2H/b2-1+	221050	2.64203	2.82944
E230	96-18-4	InChI=1S/C3H5Cl3/c4-1-3(6)2-5/h3H,1-2H2	33213.9	3.64727	3.73967
E231	630-20-6	InChI=1S/C2H2Cl4/c3-1-2(4,5)6/h1H2	24075	3.84335	3.94674
E232	78-87-5	InChI=1S/C3H6Cl2/c1-3(5)2-4/h3H,2H2,1H3/t3-/m0/s1	50631.8	3.3486	3.17636
E233	107-06-2	InChI=1S/C2H4Cl2/c3-1-2-4/h1-2H2	225313	2.64267	3.49471
E234	111-91-1	InChI=1S/C5H10Cl2O2/c6-1-3-8-5-9-4-2-7/h1-5H2	200526	2.93597	3.61671
E235	16672-87-0	InChI=1S/C2H6ClO3P/c3-1-2-7(4,5)6/h1-2H2,(H2,4,5,6)	81136	3.25064	3.61632
E236	634-66-2	InChI=1S/C6H2Cl4/c7-3-1-2-4(8)6(10)5(3)9/h1-2H	677.021	5.50363	5.2021
E237	87-61-6	InChI=1S/C6H3Cl3/c7-4-2-1-3-5(8)6(4)9/h1-3H	2333.32	4.89078	4.60011
E238	87-86-5	InChI=1S/C6HCl5O/c7-1-2(8)4(10)6(12)5(11)3(1)9/h12H	591.777	5.65327	5.56392
E239	1570-65-6	InChI=1S/C7H6Cl2O/c1-4-2-5(8)3-6(9)7(4)10/h2-3,10H,1H3	421.544	5.6232	4.92165
E240	634-90-2	InChI=1S/C6H2Cl4/c7-3-1-4(8)6(10)5(9)2-3/h1-2H	1572.8	5.13756	5.11243
E241	88-06-2	InChI=1S/C6H3Cl3O/c7-3-1-4(8)6(10)5(9)2-3/h1-2,10H	4830.75	4.61143	5.04617
E242	608-93-5	InChI=1S/C6HCl5/c7-2-1-3(8)5(10)6(11)4(2)9/h1H	4793.92	4.71783	5.48125
E243	636-30-6	InChI=1S/C6H4Cl3N/c7-3-1-5(9)6(10)2-4(3)8/h1-2H,10H2	2658.13	4.8687	4.45599
E244	95-95-4	InChI=1S/C6H3Cl3O/c7-3-1-5(9)6(10)2-4(3)8/h1-2,10H	1800.26	5.04011	5.01013
E245	15862-07-4	InChI=1S/C12H7Cl3/c13-10-7-12(15)11(14)6-9(10)8-4-2-1-3-5-8/h1-7H	589.998	5.64	5.74
E246	1836-77-7	InChI=1S/C12H6Cl3NO3/c13-7-5-10(14)12(11(15)6-7)19-9-3-1-8(2-4-9)16(17)18/h1-6H	422.928	5.8769	5.9758
E247	618-62-2	InChI=1S/C6H3Cl2NO2/c7-4-1-5(8)3-6(2-4)9(10)11/h1-3H	7234.04	4.42392	4.38342
E248	50594-66-6	InChI=1S/C14H7ClF3NO5/c15-10-5-7(14(16,17)18)1-4-12(10)24-8-2-3-11(19(22)23)9(6-8)13(20)21/h1-6H,(H,20,21)	24006.1	4.17797	4.62256
E249	1570-64-5	InChI=1S/C7H7ClO/c1-5-4-6(8)2-3-7(5)9/h2-4,9H,1H3	408.557	5.54281	4.29833
E250	95-73-8	InChI=1S/C7H6Cl2/c1-5-2-3-6(8)4-7(5)9/h2-4H,1H3	606.108	5.42435	4.34935
E251	112281-77-3	InChI=1S/C13H11Cl2F4N3O/c14-9-1-2-10(11(15)3-9)8(4-22-7-20-6-21-22)5-23-13(18,19)12(16)17/h1-3,6-8,12H,4-5H2/t8-/m0/s1	5103.16	4.86287	4.996
E252	120-82-1	InChI=1S/C6H3Cl3/c7-4-1-2-5(8)6(9)3-4/h1-3H	2181.9	4.91992	4.5355
E253	554-00-7	InChI=1S/C6H5Cl2N/c7-4-1-2-6(9)5(8)3-4/h1-3H,9H2	950.975	5.23139	3.86068
E254	120-83-2	InChI=1S/C6H4Cl2O/c7-4-1-2-6(9)5(8)3-4/h1-3,9H	2431.44	4.82633	4.58493
E255	611-06-3	InChI=1S/C6H3Cl2NO2/c7-4-1-2-6(9(10)11)5(8)3-4/h1-3H	4200.25	4.66003	4.42743
E256	95-82-9	InChI=1S/C6H5Cl2N/c7-4-1-2-5(8)6(9)3-4/h1-3H,9H2	2927.34	4.74309	3.86068
E257	3380-34-5	InChI=1S/C12H7Cl3O2/c13-7-1-3-11(9(15)5-7)17-12-4-2-8(14)6-10(12)16/h1-6,16H	307.637	5.97367	5.87923
E258	89-59-8	InChI=1S/C7H6ClNO2/c1-5-2-3-6(8)4-7(5)9(10)11/h2-4H,1H3	9228.49	4.26934	4.2833
E259	25875-51-8	InChI=1S/C15H13Cl2N5/c16-13-5-1-11(2-6-13)9-19-21-15(18)22-20-10-12-3-7-14(17)8-4-12/h1-10H,(H3,18,21,22)/b19-9+,20-10+	74.9094	6.64947	6.02693
E260	106-46-7	InChI=1S/C6H4Cl2/c7-5-1-2-6(8)4-3-5/h1-4H	6449.25	4.35781	4.23141
E261	1982-47-4	InChI=1S/C15H15ClN2O2/c1-18(2)15(19)17-12-5-9-14(10-6-12)20-13-7-3-11(16)4-8-13/h3-10H,1-2H3,(H,17,19)	2955.75	4.99284	4.9635
E262	116-29-0	InChI=1S/C12H6Cl4O2S/c13-7-1-3-8(4-2-7)19(17,18)12-6-10(15)9(14)5-11(12)16/h1-6H	4463.25	4.90186	5.57243
E263	100-00-5	InChI=1S/C6H4ClNO2/c7-5-1-3-6(4-2-5)8(9)10/h1-4H	7608.33	4.31614	4.133
E264	2051-62-9	InChI=1S/C12H9Cl/c13-12-8-6-11(7-9-12)10-4-2-1-3-5-10/h1-9H	433.169	5.63901	5.5422
E265	59467-70-8	InChI=1S/C18H13ClFN3/c1-11-21-9-13-10-22-18(14-4-2-3-5-16(14)20)15-8-12(19)6-7-17(15)23(11)13/h2-9H,10H2,1H3	199.972	6.21194	4.79502
E266	91-58-7	InChI=1S/C10H7Cl/c11-10-6-5-8-3-1-2-4-9(8)7-10/h1-7H	514.237	5.5	4.48168
E267	541-73-1	InChI=1S/C6H4Cl2/c7-5-2-1-3-6(8)4-5/h1-4H	4500	4.51411	4.25622
E268	121-73-3	InChI=1S/C6H4ClNO2/c7-5-2-1-3-6(4-5)8(9)10/h1-4H	21301.7	3.86901	4.13913
E269	2051-61-8	InChI=1S/C12H9Cl/c13-12-8-4-7-11(9-12)10-5-2-1-3-6-10/h1-9H	430.593	5.6416	5.5422
E270	90-13-1	InChI=1S/C10H7Cl/c11-10-7-3-5-8-4-1-2-6-9(8)10/h1-7H	1596.4	5.00802	4.51775
E271	108-90-7	InChI=1S/C6H5Cl/c7-6-4-2-1-3-5-6/h1-5H	11097.4	4.00615	4.05285
E272	95-50-1	InChI=1S/C6H4Cl2/c7-5-3-1-2-4-6(5)8/h1-4H	2300.31	4.80554	4.3882
E273	59756-60-4	InChI=1S/C19H14F3NO/c1-23-11-16(13-6-3-2-4-7-13)18(24)17(12-23)14-8-5-9-15(10-14)19(20,21)22/h2-12H,1H3	4522.92	4.86219	5.39114
E274	811-97-2	InChI=1S/C2H2F4/c3-1-2(4,5)6/h1H2	978886	2.018	3.2367
E275	85721-33-1	InChI=1S/C17H18FN3O3/c18-13-7-11-14(8-15(13)20-5-3-19-4-6-20)21(10-1-2-10)9-12(16(11)22)17(23)24/h7-10,19H,1-6H2,(H,23,24)	118009	3.44836	3.80808
E276	115-31-1	InChI=1S/C13H19NO2S/c1-12(2)9-4-5-13(12,3)10(6-9)16-11(15)7-17-8-14/h9-10H,4-7H2,1-3H3/t9-,10-,13+/m0/s1	88.2541	6.458	5.61453
E277	6317-18-6	InChI=1S/C3H2N2S2/c4-1-6-3-7-2-5/h3H2	73.0217	6.25113	6.10253
E278	59729-33-8	InChI=1S/C20H21FN2O/c1-23(2)11-3-10-20(17-5-7-18(21)8-6-17)19-9-4-15(13-22)12-16(19)14-24-20/h4-9,12H,3,10-11,14H2,1-2H3/t20-/m0/s1	3571.98	4.95816	3.4474
E279	14080-23-0	InChI=1S/C5H3N3/c6-4-5-7-2-1-3-8-5/h1-3H	48038.6	3.34	2.74221
E280	79-06-1	InChI=1S/C3H5NO/c1-2-3(4)5/h2H,1H2,(H2,4,5)	159745	2.64831	2.4624
E281	2008-58-4	InChI=1S/C7H5Cl2NO/c8-4-2-1-3-5(9)6(4)7(10)11/h1-3H,(H2,10,11)	516369	2.56586	3.17689
E282	62-56-6	InChI=1S/CH4N2S/c2-1(3)4/h(H4,2,3,4)	9471.34	3.90509	3.78679
E283	103-85-5	InChI=1S/C7H8N2S/c8-7(10)9-6-4-2-1-3-5-6/h1-5H,(H3,8,9,10)	54935.1	3.44261	3.51161
E284	107-11-9	InChI=1S/C3H7N/c1-2-3-4/h2H,1,3-4H2	41100	3.14275	3.05273
E285	626-43-7	InChI=1S/C6H5Cl2N/c7-4-1-5(8)3-6(9)2-4/h1-3H,9H2	1120.44	5.16017	5.06034
E286	634-67-3	InChI=1S/C6H4Cl3N/c7-3-1-2-4(10)6(9)5(3)8/h1-2H,10H2	729.963	5.42998	5.32996
E287	106-47-8	InChI=1S/C6H6ClN/c7-5-1-3-6(8)4-2-5/h1-4H,8H2	114.873	6.04554	5.38084
E288	108-45-2	InChI=1S/C6H8N2/c7-5-2-1-3-6(8)4-5/h1-4H,7-8H2	5901.88	4.263	3.43369
E289	62-53-3	InChI=1S/C6H7N/c7-6-4-2-1-3-5-6/h1-5H,7H2	390.672	5.37726	4.15239
E290	7481-89-2	InChI=1S/C9H13N3O3/c10-7-3-4-12(9(14)11-7)8-2-1-6(5-13)15-8/h3-4,6,8,13H,1-2,5H2,(H2,10,11,14)/t6-,8+/m0/s1	1.7895e+06	2.072	2.77271
E291	75-21-8	InChI=1S/C2H4O/c1-2-3-1/h1-2H2	171051	2.41084	2.60725
E292	13311-84-7	InChI=1S/C11H11F3N2O3/c1-6(2)10(17)15-7-3-4-9(16(18)19)8(5-7)11(12,13)14/h3-6H,1-2H3,(H,15,17)	2081.72	5.12282	5.4892
E293	35367-38-5	InChI=1S/C14H9ClF2N2O2/c15-8-4-6-9(7-5-8)18-14(21)19-13(20)12-10(16)2-1-3-11(12)17/h1-7H,(H2,18,19,20,21)	4.32269	7.85656	4.88394
E294	143-50-0	InChI=1S/C10Cl10O/c11-2-1(21)3(12)6(15)4(2,13)8(17)5(2,14)7(3,16)9(6,18)10(8,19)20/t2-,3+,4-,5+,6+,7-,8+,9-	210	6.36854	7.14572
E295	935-92-2	InChI=1S/C9H10O2/c1-5-4-8(10)6(2)7(3)9(5)11/h4H,1-3H3	1498.29	5.001	3.56083
E296	58-27-5	InChI=1S/C11H8O2/c1-7-6-10(12)8-4-2-3-5-9(8)11(7)13/h2-6H,1H3	491.094	5.54482	3.61537
E297	503-87-7	InChI=1S/C3H4N2OS/c6-2-1-4-3(7)5-2/h1H2,(H2,4,5,6,7)	19784.6	3.76866	3.78644
E298	67-20-9	InChI=1S/C8H6N4O5/c13-6-4-11(8(14)10-6)9-3-5-1-2-7(17-5)12(15)16/h1-3H,4H2,(H,10,13,14)/b9-3+	74195.4	3.50649	3.34763
E299	120-93-4	InChI=1S/C3H6N2O/c6-3-4-1-2-5-3/h1-2H2,(H2,4,5,6)	5.58426e+06	1.188	2.44327
E300	20830-75-5	InChI=1S/C41H64O14/c1-19-36(47)28(42)15-34(50-19)54-38-21(3)52-35(17-30(38)44)55-37-20(2)51-33(16-29(37)43)53-24-8-10-39(4)23(13-24)6-7-26-27(39)14-31(45)40(5)25(9-11-41(26,40)48)22-12-32(46)49-18-22/h12,19-21,23-31,33-38,42-45,47-48H,6-11,13-18H2,1-5H3/t19-,20+,21+,23-,24-,25+,26-,27-,28-,29+,30+,31-,33-,34+,35+,36-,37+,38+,39-,40-,41+/m1/s1	22711.7	4.53637	3.08026
E301	111-30-8	InChI=1S/C5H8O2/c6-4-2-1-3-5-7/h4-5H,1-3H2	19406	3.71257	3.54832
E302	68-12-2	InChI=1S/C3H7NO/c1-4(2)3-5/h3H,1-2H3	1.37252e+07	0.726362	2.3473
E303	88-75-5	InChI=1S/C6H5NO3/c8-6-4-2-1-3-5(6)7(9)10/h1-4,8H	14124	3.9934	3.95324
E304	86-30-6	InChI=1S/C12H10N2O/c15-13-14(11-7-3-1-4-8-11)12-9-5-2-6-10-12/h1-10H	7818.51	4.40403	4.50505
E305	115-86-6	InChI=1S/C18H15O4P/c19-23(20-16-10-4-1-5-11-16,21-17-12-6-2-7-13-17)22-18-14-8-3-9-15-18/h1-15H	1001.84	5.5128	5.65724
E306	103577-45-3	InChI=1S/C16H14F3N3O2S/c1-10-13(20-7-6-14(10)24-9-16(17,18)19)8-25(23)15-21-11-4-2-3-5-12(11)22-15/h2-7H,8-9H2,1H3,(H,21,22)/t25-/m1/s1	22081.5	4.22342	5.00329
E307	825-44-5	InChI=1S/C8H6O2S/c9-11(10)6-5-7-3-1-2-4-8(7)11/h1-6H	14040.3	4.07325	3.91107
E308	33213-65-9	InChI=1S/C9H6Cl6O3S/c10-5-6(11)8(13)4-2-18-19(16)17-1-3(4)7(5,12)9(8,14)15/h3-4H,1-2H2/t3-,4+,7+,8-,19-	688.692	5.77149	5.76262
E309	91-64-5	InChI=1S/C9H6O2/c10-9-6-5-7-3-1-2-4-8(7)11-9/h1-6H	13538.1	4.03322	4.16021
E310	51235-04-2	InChI=1S/C12H20N4O2/c1-14(2)10-13-11(17)16(12(18)15(10)3)9-7-5-4-6-8-9/h9H,4-8H2,1-3H3	118517	3.32816	3.82286
E311	1013-23-6	InChI=1S/C12H8OS/c13-14-11-7-3-1-5-9(11)10-6-2-4-8-12(10)14/h1-8H	19989.8	4.00078	4.08923
E312	77501-87-2	InChI=1S/C17H11ClF3NO7/c1-8(15(23)24)28-16(25)11-7-10(3-4-13(11)22(26)27)29-14-5-2-9(6-12(14)18)17(19,20)21/h2-8H,1H3,(H,23,24)/t8-/m1/s1	13683.9	4.501	4.36732
E313	1740-19-8	InChI=1S/C20H28O2/c1-13(2)14-6-8-16-15(12-14)7-9-17-19(16,3)10-5-11-20(17,4)18(21)22/h6,8,12-13,17H,5,7,9-11H2,1-4H3,(H,21,22)/t17-,19+,20-/m1/s1	6339.78	4.67568	5.18692
E314	94-74-6	InChI=1S/C9H9ClO3/c1-6-4-7(10)2-3-8(6)13-5-9(11)12/h2-4H,5H2,1H3,(H,11,12)	140021	3.15618	3.36445
E315	94-75-7	InChI=1S/C8H6Cl2O3/c9-5-1-2-7(6(10)3-5)13-4-8(11)12/h1-3H,4H2,(H,11,12)	59669.9	3.56871	3.66908
E316	77-06-5	InChI=1S/C19H22O6/c1-9-7-17-8-18(9,24)5-3-10(17)19-6-4-11(20)16(2,15(23)25-19)13(19)12(17)14(21)22/h4,6,10-13,20,24H,1,3,5,7-8H2,2H3,(H,21,22)/t10-,11-,12+,13-,16+,17+,18+,19+/m1/s1	22509.4	4.18718	2.94991
E317	69-72-7	InChI=1S/C7H6O3/c8-6-4-2-1-3-5(6)7(9)10/h1-4,8H,(H,9,10)	96701.4	3.15483	3.41221
E318	6607	InChI=1S/C6H3Cl3N2O2/c7-1-3(10)2(8)5(9)11-4(1)6(12)13/h(H2,10,11)(H,12,13)	49504	3.6882	3.30226
E319	76738-62-0	InChI=1S/C15H20ClN3O/c1-15(2,3)14(20)13(19-10-17-9-18-19)8-11-4-6-12(16)7-5-11/h4-7,9-10,13-14,20H,8H2,1-3H3/t13-,14+/m1/s1	29295.2	4.00124	4.54031
E320	29122-68-7	InChI=1S/C14H22N2O3/c1-10(2)16-8-12(17)9-19-13-5-3-11(4-6-13)7-14(15)18/h3-6,10,12,16-17H,7-9H2,1-2H3,(H2,15,18)/t12-/m0/s1	201384	3.1214	2.91634
E321	42200-33-9	InChI=1S/C17H27NO4/c1-17(2,3)18-9-12(19)10-22-16-6-4-5-11-7-14(20)15(21)8-13(11)16/h4-6,12,14-15,18-21H,7-10H2,1-3H3/t12-,14+,15+/m1/s1	131255	3.37241	3.16815
E322	78-83-1	InChI=1S/C4H10O/c1-4(2)3-5/h4-5H,3H2,1-2H3	1.07594e+06	1.83816	2.26087
E323	115-20-8	InChI=1S/C2H3Cl3O/c3-2(4,5)1-6/h6H,1H2	148359	3.00305	3.33397
E324	111-42-2	InChI=1S/C4H11NO2/c6-3-1-5-2-4-7/h5-7H,1-4H2	109513	2.98229	2.42818
E325	110-80-5	InChI=1S/C4H10O2/c1-2-6-4-3-5/h5H,2-4H2,1H3	7.67027e+06	1.07002	2.02145
E326	111-90-0	InChI=1S/C6H14O3/c1-2-8-5-6-9-4-3-7/h7H,2-6H2,1H3	2.97088e+06	1.65478	1.93056
E327	57-92-1	InChI=1S/C21H39N7O12/c1-5-21(36,4-30)16(40-17-9(26-2)13(34)10(31)6(3-29)38-17)18(37-5)39-15-8(28-20(24)25)11(32)7(27-19(22)23)12(33)14(15)35/h4-18,26,29,31-36H,3H2,1-2H3,(H4,22,23,27)(H4,24,25,28)/t5-,6-,7+,8-,9-,10+,11+,12-,13+,14-,15-,16-,17+,18-,21-/m1/s1	487085	3.077	0.32493
E328	7542-37-2	InChI=1S/C23H45N5O14/c24-2-7-13(32)15(34)10(27)21(37-7)41-19-9(4-30)39-23(17(19)36)42-20-12(31)5(25)1-6(26)18(20)40-22-11(28)16(35)14(33)8(3-29)38-22/h5-23,29-36H,1-4,24-28H2/t5-,6-,7-,8+,9+,10+,11+,12-,13+,14+,15+,16-,17-,18+,19+,20+,21-,22+,23-/m0/s1	502712	3.088	0.155181
E329	59-50-7	InChI=1S/C7H7ClO/c1-5-4-6(9)2-3-7(5)8/h2-4,9H,1H3	2002.39	4.85252	4.75304
E330	106-41-2	InChI=1S/C6H5BrO/c7-5-1-3-6(8)4-2-5/h1-4,8H	5946.9	4.46377	4.56355
E331	106-48-9	InChI=1S/C6H5ClO/c7-5-1-3-6(8)4-2-5/h1-4,8H	4460.25	4.45973	4.36294
E332	100-02-7	InChI=1S/C6H5NO3/c8-6-3-1-5(2-4-6)7(9)10/h1-4,8H	13368.9	4.01726	3.91168
E333	92-69-3	InChI=1S/C12H10O/c13-12-8-6-11(7-9-12)10-4-2-1-3-5-10/h1-9,13H	3657.88	4.66775	4.6487
E334	135-19-3	InChI=1S/C10H8O/c11-10-6-5-8-3-1-2-4-9(8)7-10/h1-7,11H	3539.48	4.60994	4.11086
E335	95-57-8	InChI=1S/C6H5ClO/c7-5-3-1-2-4-6(5)8/h1-4,8H	5015.89	4.40874	4.61389
E336	90-43-7	InChI=1S/C12H10O/c13-12-9-5-4-8-11(12)10-6-2-1-3-7-10/h1-9,13H	1704.77	4.99931	4.88747
E337	532-55-8	InChI=1S/C8H5NOS/c10-8(9-6-11)7-4-2-1-3-5-7/h1-5H	1904.29	4.93298	4.83396
E338	130638	InChI=1S/C9H9NS/c11-8-10-7-6-9-4-2-1-3-5-9/h1-5H,6-7H2	129.982	6.09894	5.03325
E339	622-78-6	InChI=1S/C8H7NS/c10-7-9-6-8-4-2-1-3-5-8/h1-5H,6H2	43.0167	6.54017	4.36823
E340	4044-65-9	InChI=1S/C8H4N2S2/c11-5-9-7-1-2-8(4-3-7)10-6-12/h1-4H	76.8585	6.3982	5.80989
E341	103-72-0	InChI=1S/C7H5NS/c9-6-8-7-4-2-1-3-5-7/h1-5H	99.9921	6.13097	4.6973
E342	75-15-0	InChI=1S/CS2/c2-1-3	2098.54	4.5597	4.4594
E343	149-30-4	InChI=1S/C7H5NS2/c9-7-8-5-3-1-2-4-6(5)10-7/h1-4H,(H,8,9)	4731.26	4.54839	5.01587
E344	578517	InChI=1S/C4H10O2S2/c5-3(1-7)4(6)2-8/h3-8H,1-2H2/t3-,4+	26929.5	3.758	3.65686
E345	138261-41-3	InChI=1S/C9H10ClN5O2/c10-8-2-1-7(5-12-8)6-14-4-3-11-9(14)13-15(16)17/h1-2,5H,3-4,6H2,(H,11,13)	51182.3	3.69854	3.22384
E346	55-63-0	InChI=1S/C3H5N3O9/c7-4(8)13-1-3(15-6(11)12)2-14-5(9)10/h3H,1-2H2	32038.5	3.85052	3.12892
E347	693-21-0	InChI=1S/C4H8N2O7/c7-5(8)12-3-1-11-2-4-13-6(9)10/h1-4H2	89974.6	3.33839	3.23779
E348	602-01-7	InChI=1S/C7H6N2O4/c1-5-3-2-4-6(8(10)11)7(5)9(12)13/h2-4H,1H3	659.885	5.44092	4.94419
E349	148-01-6	InChI=1S/C8H7N3O5/c1-4-6(8(9)12)2-5(10(13)14)3-7(4)11(15)16/h2-3H,1H3,(H2,9,12)	164433	3.1365	3.42564
E350	534-52-1	InChI=1S/C7H6N2O5/c1-4-2-5(8(11)12)3-6(7(4)10)9(13)14/h2-3,10H,1H3	3206.67	4.7909	4.69181
E351	118-96-7	InChI=1S/C7H5N3O6/c1-4-6(9(13)14)2-5(8(11)12)3-7(4)10(15)16/h2-3H,1H3	7926.43	4.4572	4.73662
E352	88-89-1	InChI=1S/C6H3N3O7/c10-6-4(8(13)14)1-3(7(11)12)2-5(6)9(15)16/h1-2,10H	85060.1	3.43031	4.02344
E353	99-51-4	InChI=1S/C8H9NO2/c1-6-3-4-8(9(10)11)5-7(6)2/h3-5H,1-2H3	15950.9	3.97666	4.07532
E354	121-87-9	InChI=1S/C6H5ClN2O2/c7-5-3-4(9(10)11)1-2-6(5)8/h1-3H,8H2	5598.55	4.48889	4.55169
E355	121-14-2	InChI=1S/C7H6N2O4/c1-5-2-3-6(8(10)11)4-7(5)9(12)13/h2-4H,1H3	34932.6	3.71716	4.63248
E356	97-00-7	InChI=1S/C6H3ClN2O4/c7-5-2-1-4(8(10)11)3-6(5)9(12)13/h1-3H	801.335	5.40272	4.79461
E357	51-28-5	InChI=1S/C6H4N2O5/c9-6-2-1-4(7(10)11)3-5(6)8(12)13/h1-3,9H	4330.54	4.62853	4.37414
E358	99-65-0	InChI=1S/C6H4N2O4/c9-7(10)5-2-1-3-6(4-5)8(11)12/h1-4H	43061.2	3.5915	4.78512
E359	83-41-0	InChI=1S/C8H9NO2/c1-6-4-3-5-8(7(6)2)9(10)11/h3-5H,1-2H3	4191.3	4.5571	4.27868
E360	83-42-1	InChI=1S/C7H6ClNO2/c1-5-6(8)3-2-4-7(5)9(10)11/h2-4H,1H3	4201.06	4.61111	4.42086
E361	3209-22-1	InChI=1S/C6H3Cl2NO2/c7-4-2-1-3-5(6(4)8)9(10)11/h1-3H	4402.88	4.63956	4.75801
E362	98-95-3	InChI=1S/C6H5NO2/c8-7(9)6-4-2-1-3-5-6/h1-5H	18536.9	3.82225	4.16603
E363	88-72-2	InChI=1S/C7H7NO2/c1-6-4-2-3-5-7(6)8(9)10/h2-5H,1H3	9367.31	4.16554	4.16209
E364	83-32-9	InChI=1S/C12H10/c1-3-9-4-2-6-11-8-7-10(5-1)12(9)11/h1-6H,7-8H2	24470.7	3.79946	4.38988
E365	2764-72-9	InChI=1S/C12H12N2/c1-3-7-13-9-10-14-8-4-2-6-12(14)11(13)5-1/h1-8H,9-10H2/q+2	2022.03	4.95959	4.33254
E366	101-84-8	InChI=1S/C12H10O/c1-3-7-11(8-4-1)13-12-9-5-2-6-10-12/h1-10H	649.012	5.41872	5.3049
E367	92-52-4	InChI=1S/C12H10/c1-3-7-11(8-4-1)12-9-5-2-6-10-12/h1-10H	2024.66	4.88175	5.0157
E368	86-74-8	InChI=1S/C12H9N/c1-3-7-11-9(5-1)10-6-2-4-8-12(10)13-11/h1-8,13H	3353.27	4.69779	4.59558
E369	120-72-9	InChI=1S/C8H7N/c1-2-4-8-7(3-1)5-6-9-8/h1-6,9H	1002.58	5.06762	3.74428
E370	50-32-8	InChI=1S/C20H12/c1-2-7-17-15(4-1)12-16-9-8-13-5-3-6-14-10-11-18(17)20(16)19(13)14/h1-12H	249.998	6.004	6.95107
E371	206-44-0	InChI=1S/C16H10/c1-2-8-13-12(7-1)14-9-3-5-11-6-4-10-15(13)16(11)14/h1-10H	161.307	6.09824	5.75764
E372	85-01-8	InChI=1S/C14H10/c1-3-7-13-11(5-1)9-10-12-6-2-4-8-14(12)13/h1-10H	455.903	5.59211	5.46002
E373	120-12-7	InChI=1S/C14H10/c1-2-6-12-10-14-8-4-3-7-13(14)9-11(12)5-1/h1-10H	263.213	5.83067	5.46002
E374	205-39-0	InChI=1S/C16H10O/c1-2-6-12-11(5-1)9-10-15-16(12)13-7-3-4-8-14(13)17-15/h1-10H	3999.03	4.737	5.33158
E375	205-43-6	InChI=1S/C16H10S/c1-2-6-12-11(5-1)9-10-15-16(12)13-7-3-4-8-14(13)17-15/h1-10H	219.436	6.02849	6.23578
E376	91-20-3	InChI=1S/C10H8/c1-2-6-10-8-4-3-7-9(10)5-1/h1-8H	9695.93	4.1212	4.64434
E377	119-65-3	InChI=1S/C9H7N/c1-2-4-9-7-10-6-5-8(9)3-1/h1-7H	25113.1	3.71122	4.19071
E378	260-94-6	InChI=1S/C13H9N/c1-3-7-12-10(5-1)9-11-6-2-4-8-13(11)14-12/h1-9H	2287.84	4.89395	4.99015
E379	91-22-5	InChI=1S/C9H7N/c1-2-6-9-8(4-1)5-3-7-10-9/h1-7H	36308.8	3.55111	3.86055
E380	120-78-5	InChI=1S/C14H8N2S4/c1-3-7-11-9(5-1)15-13(17-11)19-20-14-16-10-6-2-4-8-12(10)18-14/h1-8H	79941.9	3.619	5.74713
E381	132-65-0	InChI=1S/C12H8S/c1-3-7-11-9(5-1)10-6-2-4-8-12(10)13-11/h1-8H	454.52	5.60787	5.51902
E382	110-86-1	InChI=1S/C5H5N/c1-2-4-6-5-3-1/h1-5H	1.07754e+06	1.86574	2.21832
E383	110-02-1	InChI=1S/C4H4S/c1-2-4-5-3-1/h1-4H	318576	2.42179	3.48639
E384	108-85-0	InChI=1S/C6H11Br/c7-6-4-2-1-3-5-6/h6H,1-5H2	21002.8	3.89006	3.99012
E385	59865-13-3	InChI=1S/C62H111N11O12/c1-25-27-28-40(15)52(75)51-56(79)65-43(26-2)58(81)67(18)33-48(74)68(19)44(29-34(3)4)55(78)66-49(38(11)12)61(84)69(20)45(30-35(5)6)54(77)63-41(16)53(76)64-42(17)57(80)70(21)46(31-36(7)8)59(82)71(22)47(32-37(9)10)60(83)72(23)50(39(13)14)62(85)73(51)24/h25,27,34-47,49-52,75H,26,28-33H2,1-24H3,(H,63,77)(H,64,76)(H,65,79)(H,66,78)/b27-25+/t40-,41-,42-,43-,44+,45+,46+,47+,49-,50+…	20002.2	4.77905	0.253851
E386	79-92-5	InChI=1S/C10H16/c1-7-8-4-5-9(6-8)10(7,2)3/h8-9H,1,4-6H2,2-3H3/t8-,9+/m1/s1	19029.2	3.85486	4.18509
E387	107-02-8	InChI=1S/C3H4O/c1-2-3-4/h2-3H,1H2	56.9743	5.993	3.30797
E388	586-62-9	InChI=1S/C12H20O2/c1-9-5-7-11(8-6-9)12(3,4)14-10(2)13/h5,11H,6-8H2,1-4H3/t11-/m0/s1	2552.05	4.886	4.72021
E389	10161-34-9	InChI=1S/C20H24O3/c1-12(21)23-19-8-7-18-17-5-3-13-11-14(22)4-6-15(13)16(17)9-10-20(18,19)2/h9-11,17-19H,3-8H2,1-2H3/t17-,18+,19+,20-/m0/s1	898.908	5.541	4.69762
E390	62-55-5	InChI=1S/C2H5NS/c1-2(3)4/h1H3,(H2,3,4)	17345.7	3.63664	4.29926
E391	107-41-5	InChI=1S/C6H14O2/c1-5(7)4-6(2,3)8/h5,7-8H,4H2,1-3H3/t5-/m1/s1	1.33248e+07	0.947861	1.99767
E392	770-35-4	InChI=1S/C9H12O2/c1-8(10)7-11-9-5-3-2-4-6-9/h2-6,8,10H,7H2,1H3/t8-/m1/s1	370078	2.61409	3.17207
E393	101-21-3	InChI=1S/C10H12ClNO2/c1-7(2)14-10(13)12-9-5-3-4-8(11)6-9/h3-7H,1-2H3,(H,12,13)	3147.97	4.83169	4.91902
E394	1445-75-6	InChI=1S/C7H17O3P/c1-6(2)9-11(5,8)10-7(3)4/h6-7H,1-5H3	267062	2.8291	5.83112
E395	56-53-1	InChI=1S/C18H20O2/c1-3-17(13-5-9-15(19)10-6-13)18(4-2)14-7-11-16(20)12-8-14/h5-12,19-20H,3-4H2,1-2H3	1144.73	5.37	5.16354
E396	108-87-2	InChI=1S/C7H14/c1-7-5-3-2-4-6-7/h7H,2-6H2,1H3	1489.53	4.819	4.64275
E397	111-65-9	InChI=1S/C8H18/c1-3-5-7-8-6-4-2/h3-8H2,1-2H3	382.581	5.47505	5.38017
E398	124-18-5	InChI=1S/C10H22/c1-3-5-7-9-10-8-6-4-2/h3-10H2,1-2H3	714.743	5.299	5.36271
E399	19295-81-9	InChI=1S/C24H38O4/c1-3-5-7-9-10-12-16-20-28-24(26)22-18-14-13-17-21(22)23(25)27-19-15-11-8-6-4-2/h13-14,17-18H,3-12,15-16,19-20H2,1-2H3	249.852	6.194	5.45528
E400	109-46-6	InChI=1S/C9H20N2S/c1-3-5-7-10-9(12)11-8-6-4-2/h3-8H2,1-2H3,(H2,10,11,12)	33788	3.74617	4.27944
E401	126-73-8	InChI=1S/C12H27O4P/c1-4-7-10-14-17(13,15-11-8-5-2)16-12-9-6-3/h4-12H2,1-3H3	3279.63	4.90957	5.38803
E402	67747-09-5	InChI=1S/C15H16Cl3N3O2/c1-2-4-20(15(22)21-5-3-19-10-21)6-7-23-14-12(17)8-11(16)9-13(14)18/h3,5,8-10H,2,4,6-7H2,1H3	4297.46	4.94274	5.45883
E403	28249-77-6	InChI=1S/C12H16ClNOS/c1-3-14(4-2)12(15)16-9-10-5-7-11(13)8-6-10/h5-8H,3-4,9H2,1-2H3	2014.94	5.10699	4.81768
E404	134-62-3	InChI=1S/C12H17NO/c1-4-13(5-2)12(14)11-8-6-7-10(3)9-11/h6-9H,4-5H2,1-3H3	117412	3.21193	3.5414
E405	97-77-8	InChI=1S/C10H20N2S4/c1-5-11(6-2)9(13)15-16-10(14)12(7-3)8-4/h5-8H2,1-4H3	216.694	6.13624	7.54022
E406	625-53-6	InChI=1S/C3H8N2S/c1-2-5-3(4)6/h2H2,1H3,(H3,4,5,6)	13035.7	3.90262	3.77163
E407	109-89-7	InChI=1S/C4H11N/c1-3-5-4-2/h5H,3-4H2,1-2H3	55868	3.11697	3.16332
E408	103-69-5	InChI=1S/C8H11N/c1-2-9-8-6-4-3-5-7-8/h3-7,9H,2H2,1H3	420.089	5.46009	5.17524
E409	1912-24-9	InChI=1S/C8H14ClN5/c1-4-10-7-12-6(9)13-8(14-7)11-5(2)3/h5H,4H2,1-3H3,(H2,10,11,12,13,14)	45076.3	3.67987	3.96175
E410	1014-70-6	InChI=1S/C8H15N5S/c1-4-9-6-11-7(10-5-2)13-8(12-6)14-3/h4-5H2,1-3H3,(H2,9,10,11,12,13)	50001.6	3.63001	3.73003
E411	141-78-6	InChI=1S/C4H8O2/c1-3-6-4(2)5/h3H2,1-2H3	638073	2.14013	3.20963
E412	22224-92-6	InChI=1S/C13H22NO3PS/c1-6-16-18(15,14-10(2)3)17-12-7-8-13(19-5)11(4)9-12/h7-10H,6H2,1-5H3,(H,14,15)/t18-/m1/s1	2.11929	8.15576	5.24191
E413	100-41-4	InChI=1S/C8H10/c1-2-8-6-4-3-5-7-8/h3-7H,2H2,1H3	2720.9	4.59127	4.51505
E414	50-48-6	InChI=1S/C20H23N/c1-21(2)15-7-12-20-18-10-5-3-8-16(18)13-14-17-9-4-6-11-19(17)20/h3-6,8-12H,7,13-15H2,1-2H3	965.014	5.45858	5.48241
E415	556-61-6	InChI=1S/C2H3NS/c1-3-2-4/h1H3	211.633	5.53843	5.60566
E416	124-40-3	InChI=1S/C2H7N/c1-3-2/h3H,1-2H3	49330.7	2.9609	2.86382
E417	114-26-1	InChI=1S/C11H15NO3/c1-8(2)14-9-6-4-5-7-10(9)15-11(13)12-3/h4-8H,1-3H3,(H,12,13)	1362.12	5.18643	5.0754
E418	534-13-4	InChI=1S/C3H8N2S/c1-4-3(6)5-2/h1-2H3,(H2,4,5,6)	16043.4	3.81246	3.70028
E419	131860-33-8	InChI=1S/C22H17N3O5/c1-27-13-17(22(26)28-2)16-8-4-6-10-19(16)30-21-11-20(24-14-25-21)29-18-9-5-3-7-15(18)12-23/h3-11,13-14H,1-2H3/b17-13+	197.355	6.31047	5.43565
E420	10605-21-7	InChI=1S/C9H9N3O2/c1-14-9(13)12-8-10-6-4-2-3-5-7(6)11-8/h2-5H,1H3,(H2,10,11,12,13)	166.052	6.06121	4.64264
E421	126-07-8	InChI=1S/C17H17ClO6/c1-8-5-9(19)6-12(23-4)17(8)16(20)13-10(21-2)7-11(22-3)14(18)15(13)24-17/h6-8H,5H2,1-4H3/t8-,17-/m1/s1	1.10024e+06	2.506	4.51425
E422	732-11-6	InChI=1S/C11H12NO4PS2/c1-15-17(18,16-2)19-7-12-10(13)8-5-3-4-6-9(8)11(12)14/h3-6H,7H2,1-2H3	561.141	5.75243	7.19052
E423	83-79-4	InChI=1S/C23H22O6/c1-11(2)16-8-14-15(28-16)6-5-12-22(24)21-13-7-18(25-3)19(26-4)9-17(13)27-10-20(21)29-23(12)14/h5-7,9,16,20-21H,1,8,10H2,2-4H3/t16-,20+,21+/m1/s1	3.6979	8.028	5.45157
E424	22204-53-1	InChI=1S/C14H14O3/c1-9(14(15)16)10-3-4-12-8-13(17-2)6-5-11(12)7-10/h3-9H,1-2H3,(H,15,16)/t9-/m1/s1	105501	3.33896	3.27462
E425	67-68-5	InChI=1S/C2H6OS/c1-4(2)3/h1-2H3	2.49971e+07	0.494947	3.95175
E426	779-02-2	InChI=1S/C15H12/c1-11-14-8-4-2-6-12(14)10-13-7-3-5-9-15(11)13/h2-10H,1H3	124.131	6.19	5.21867
E427	108-67-8	InChI=1S/C9H12/c1-7-4-8(2)6-9(3)5-7/h4-6H,1-3H3	6023.87	4.3	3.99316
E428	99-99-0	InChI=1S/C7H7NO2/c1-6-2-4-7(5-3-6)8(9)10/h2-5H,1H3	13459.1	4.00814	4.0837
E429	576-26-1	InChI=1S/C8H10O/c1-6-4-3-5-7(2)8(6)9/h3-5,9H,1-2H3	11196.4	4.03786	4.08603
E430	108-88-3	InChI=1S/C7H8/c1-7-5-3-2-4-6-7/h2-6H,1H3	55657.5	3.21892	3.7109
E431	95-53-4	InChI=1S/C7H9N/c1-6-4-2-3-5-7(6)8/h2-5H,8H2,1H3	521.2	5.313	4.07763
E432	79-00-5	InChI=1S/C2H3Cl3/c3-1-2(4)5/h2H,1H2	30485.2	3.64108	3.7699
E433	142-28-9	InChI=1S/C3H6Cl2/c4-2-1-3-5/h1-3H2	279314	2.60693	2.70587
E434	111-44-4	InChI=1S/C4H8Cl2O/c5-1-3-7-4-2-6/h1-4H2	239218	2.77658	3.90146
E435	75-09-2	InChI=1S/CH2Cl2/c2-1-3/h1H2	160620	2.72327	3.11677
E436	634-83-3	InChI=1S/C6H3Cl4N/c7-2-1-3(11)5(9)6(10)4(2)8/h1H,11H2	638.718	5.55813	4.61096
E437	4901-51-3	InChI=1S/C6H2Cl4O/c7-2-1-3(11)5(9)6(10)4(2)8/h1,11H	402.98	5.76	5.51563
E438	935-95-5	InChI=1S/C6H2Cl4O/c7-2-1-3(8)5(10)6(11)4(2)9/h1,11H	569.612	5.6097	5.64432
E439	6639-30-1	InChI=1S/C7H5Cl3/c1-4-2-6(9)7(10)3-5(4)8/h2-3H,1H3	550.921	5.55	4.36968
E440	89-61-2	InChI=1S/C6H3Cl2NO2/c7-4-1-2-5(8)6(3-4)9(10)11/h1-3H	10886.1	4.24643	4.42743
E441	107534-96-3	InChI=1S/C16H22ClN3O/c1-15(2,3)16(21,10-20-12-18-11-19-20)9-8-13-4-6-14(17)7-5-13/h4-7,11-12,21H,8-10H2,1-3H3/t16-/m1/s1	3217.32	4.9808	4.69398
E442	2051-60-7	InChI=1S/C12H9Cl/c13-12-9-5-4-8-11(12)10-6-2-1-3-7-10/h1-9H	711.972	5.4232	5.32441
E443	1897-45-6	InChI=1S/C8Cl4N2/c9-5-3(1-13)6(10)8(12)7(11)4(5)2-14	142.605	6.2706	5.78388
E444	95-76-1	InChI=1S/C6H5Cl2N/c7-5-2-1-4(9)3-6(5)8/h1-3H,9H2	2160.14	4.87508	4.89475
E445	91-94-1	InChI=1S/C12H10Cl2N2/c13-9-5-7(1-3-11(9)15)8-2-4-12(16)10(14)6-8/h1-6H,15-16H2	1051.39	5.38157	5.17008
E446	108-42-9	InChI=1S/C6H6ClN/c7-5-2-1-3-6(8)4-5/h1-4H,8H2	99.7422	6.10688	5.37828
E447	95-51-2	InChI=1S/C6H6ClN/c7-5-3-1-2-4-6(5)8/h1-4H,8H2	820.17	5.19185	5.11415
E448	872-50-4	InChI=1S/C5H9NO/c1-6-4-2-3-5(6)7/h2-4H2,1H3	1230.43	4.90615	3.21248
E449	90-02-8	InChI=1S/C7H6O2/c8-5-6-3-1-2-4-7(6)9/h1-5,9H	4286.21	4.45472	4.1172
E450	60-00-4	InChI=1S/C10H16N2O8/c13-7(14)3-11(4-8(15)16)1-2-12(5-9(17)18)6-10(19)20/h1-6H2,(H,13,14)(H,15,16)(H,17,18)(H,19,20)	202270	3.15981	3.03144
E451	1071-83-6	InChI=1S/C3H8NO5P/c5-3(6)1-4-2-10(7,8)9/h4H,1-2H2,(H,5,6)(H2,7,8,9)	30448.3	3.74451	3.52601
E452	15307-86-5	InChI=1S/C14H11Cl2NO2/c15-10-5-3-6-11(16)14(10)17-12-7-2-1-4-9(12)8-13(18)19/h1-7,17H,8H2,(H,18,19)	28206.8	4.02116	3.84003
E453	107-07-3	InChI=1S/C2H5ClO/c3-1-2-4/h4H,1-2H2	203818	2.59663	2.715
E454	58-90-2	InChI=1S/C6H2Cl4O/c7-2-1-3(8)6(11)5(10)4(2)9/h1,11H	234.964	5.99428	5.803
E455	609-19-8	InChI=1S/C6H3Cl3O/c7-4-1-3(10)2-5(8)6(4)9/h1-2,10H	681.522	5.46197	5.36294
E456	102-08-9	InChI=1S/C13H12N2S/c16-13(14-11-7-3-1-4-8-11)15-12-9-5-2-6-10-12/h1-10H,(H2,14,15,16)	67112.5	3.53173	4.73868
E457	33813-20-6	InChI=1S/C4H4N2S3/c7-4-6-2-1-5-3(6)8-9-4/h1-2H2	210.483	5.92299	5.34656
E458	88-73-3	InChI=1S/C6H4ClNO2/c7-5-3-1-2-4-6(5)8(9)10/h1-4H	29946.8	3.72108	4.07265
E459	129-00-0	InChI=1S/C16H10/c1-3-11-7-9-13-5-2-6-14-10-8-12(4-1)15(11)16(13)14/h1-10H	124.057	6.21227	6.15544
E460	122-66-7	InChI=1S/C12H12N2/c1-3-7-11(8-4-1)13-14-12-9-5-2-6-10-12/h1-10,13-14H	4107.53	4.6518	4.87438
E461	92-83-1	InChI=1S/C13H10O/c1-3-7-12-10(5-1)9-11-6-2-4-8-13(11)14-12/h1-8H,9H2	20304.5	3.953	4.4806
E462	56-55-3	InChI=1S/C18H12/c1-2-7-15-12-18-16(11-14(15)6-1)10-9-13-5-3-4-8-17(13)18/h1-12H	83.1509	6.43862	6.80474
E463	132-64-9	InChI=1S/C12H8O/c1-3-7-11-9(5-1)10-6-2-4-8-12(10)13-11/h1-8H	2658.69	4.80114	4.53805
E464	71-43-2	InChI=1S/C6H6/c1-2-4-6-5-3-1/h1-6H	144926	2.73157	3.49856
E465	55-86-7	InChI=1S/C5H11Cl2N/c1-8(4-2-6)5-3-7/h2-5H2,1H3	2720	4.75871	4.14066
E466	65-30-5	InChI=1S/C10H14N2/c1-12-7-3-5-10(12)9-4-2-6-11-8-9/h2,4,6,8,10H,3,5,7H2,1H3/t10-/m0/s1	3250	4.69825	3.89208
E467	67-48-1	InChI=1S/C5H14NO/c1-6(2,3)4-5-7/h7H,4-5H2,1-3H3/q+1	349000	2.47492	1.7653
E468	81-88-9	InChI=1S/C28H31N2O3/c1-5-29(6-2)19-13-15-23-25(17-19)33-26-18-20(30(7-3)8-4)14-16-24(26)27(23)21-11-9-10-12-22(21)28(31)32/h9-18H,5-8H2,1-4H3,(H,31,32)/q+1	22900	4.28711	3.43109
E469	107-64-2	InChI=1S/C38H80N/c1-5-7-9-11-13-15-17-19-21-23-25-27-29-31-33-35-37-39(3,4)38-36-34-32-30-28-26-24-22-20-18-16-14-12-10-8-6-2/h5-38H2,1-4H3/q+1	3100	5.24983	0.0768946
E470	108-77-0	InChI=1S/C3Cl3N3/c4-1-7-2(5)9-3(6)8-1	2000000	1.96476	3.70516
E471	108-80-5	InChI=1S/C3H3N3O3/c7-1-4-2(8)6-3(9)5-1/h(H3,4,5,6,7,8,9)	1000000	2.11084	2.29825
E472	112-02-7	InChI=1S/C19H42N/c1-5-6-7-8-9-10-11-12-13-14-15-16-17-18-19-20(2,3)4/h5-19H2,1-4H3/q+1	10	7.45415	2.94668
E473	123-33-1	InChI=1S/C4H4N2O2/c7-3-1-2-4(8)6-5-3/h1-2H,(H,5,7)(H,6,8)	107700	3.01734	2.88092
E474	127-68-4	InChI=1S/C6H5NO5S/c8-7(9)5-2-1-3-6(4-5)13(10,11)12/h1-4H,(H,10,11,12)	8.665e+06	1.3701	3.69717
E475	128-04-1	InChI=1S/C3H7NS2/c1-4(2)3(5)6/h1-2H3,(H,5,6)	670	5.25751	5.55919
E476	128-56-3	InChI=1S/C14H8O5S/c15-13-8-4-1-2-5-9(8)14(16)12-10(13)6-3-7-11(12)20(17,18)19/h1-7H,(H,17,18,19)	186000	3.19029	3.28371
E477	131-52-2	InChI=1S/C6HCl5O/c7-1-2(8)4(10)6(12)5(11)3(1)9/h12H	840	5.50115	5.71368
E478	131-72-6	InChI=1S/C18H24N2O6/c1-3-5-6-7-8-9-11-14-12-15(19(22)23)13-16(20(24)25)18(14)26-17(21)10-4-2/h4,10,12-13H,3,5-9,11H2,1-2H3/b10-4+	4.2	7.93832	6.67189
E479	137-42-8	InChI=1S/C2H5NS2/c1-3-2(4)5/h1H3,(H2,3,4,5)	990	5.03455	5.40445
E480	141-90-2	InChI=1S/C4H4N2OS/c7-3-1-2-5-4(8)6-3/h1-2H,(H2,5,6,7,8)	7702.08	4.22112	3.75016
E481	148-18-5	InChI=1S/C5H11NS2/c1-3-6(4-2)5(7)8/h3-4H2,1-2H3,(H,7,8)	910	5.21495	5.27292
E482	151-21-3	InChI=1S/C12H26O4S/c1-2-3-4-5-6-7-8-9-10-11-12-16-17(13,14)15/h2-12H2,1H3,(H,13,14,15)	25390	4.02087	4.56782
E483	302-04-5	InChI=1S/CHNS/c2-1-3/h3H	57400	3.0126	5.09719
E484	306-67-2	InChI=1S/C10H26N4/c11-5-3-9-13-7-1-2-8-14-10-4-6-12/h13-14H,1-12H2	3000	4.82896	3.37061
E485	500-28-7	InChI=1S/C8H9ClNO5PS/c1-13-16(17,14-2)15-6-3-4-8(10(11)12)7(9)5-6/h3-5H,1-2H3	4200	4.85046	8.28001
E486	525-79-1	InChI=1S/C10H9N5O/c1-2-7(16-3-1)4-11-9-8-10(13-5-12-8)15-6-14-9/h1-3,5-6H,4H2,(H2,11,12,13,14,15)	1900	5.05411	3.25905
E487	584-08-7	InChI=1S/CH2O3/c2-1(3)4/h(H2,2,3,4)	925000	1.82642	2.3584
E488	650-51-1	InChI=1S/C2HCl3O2/c3-2(4,5)1(6)7/h(H,6,7)	2318250	1.84806	2.92088
E489	824-78-2	InChI=1S/C6H5NO3/c8-6-3-1-5(2-4-6)7(9)10/h1-4,8H	27700	3.70088	3.91168
E490	825-90-1	InChI=1S/C6H6O4S/c7-5-1-3-6(4-2-5)11(8,9)10/h1-4,7H,(H,8,9,10)	13510000	1.11033	3.57441
E491	999-81-5	InChI=1S/C5H13ClN/c1-7(2,3)5-4-6/h4-5H2,1-3H3/q+1	31700	3.58749	2.7635
E492	1405-87-4	InChI=1S/C66H103N17O16S/c1-9-35(6)52(69)66-81-48(32-100-66)63(97)76-43(26-34(4)5)59(93)74-42(22-23-50(85)86)58(92)83-53(36(7)10-2)64(98)75-40-20-15-16-25-71-55(89)46(29-49(68)84)78-62(96)47(30-51(87)88)79-61(95)45(28-39-31-70-33-72-39)77-60(94)44(27-38-18-13-12-14-19-38)80-65(99)54(37(8)11-3)82-57(91)41(21-17-24-67)73-56(40)90/h12-14,18-19,31,33-37,39-48,52-54H,9-11,15-17,20-30,32,67,69H2,1-8H3,(…	30480	4.6691	0.0345492
E493	1910-42-5	InChI=1S/C12H14N2/c1-13-7-3-11(4-8-13)12-5-9-14(2)10-6-12/h3-10H,1-2H3/q+2	1200	5.19092	3.15138
E494	2008-39-1	InChI=1S/C8H6Cl2O3/c9-5-1-2-7(6(10)3-5)13-4-8(11)12/h1-3H,4H2,(H,11,12)	184000	3.07965	3.66908
E495	2104-64-5	InChI=1S/C14H14NO4PS/c1-2-18-20(21,14-6-4-3-5-7-14)19-13-10-8-12(9-11-13)15(16)17/h3-11H,2H2,1H3/t20-/m0/s1	0.06	9.73146	7.55968
E496	2302-17-2	InChI=1S/C8H10N2O4S/c1-14-8(11)10-15(12,13)7-4-2-6(9)3-5-7/h2-5H,9H2,1H3,(H,10,11)	57900	3.5995	2.80366
E497	2386-54-1	InChI=1S/C4H10O3S/c1-2-3-4-8(5,6)7/h2-4H2,1H3,(H,5,6,7)	8000000	1.23737	4.00746
E498	2492-26-4	InChI=1S/C7H5NS2/c9-7-8-5-3-1-2-4-6(5)10-7/h1-4H,(H,8,9)	19000	3.94462	5.00853
E499	2545-60-0	InChI=1S/C6H3Cl3N2O2/c7-1-3(10)2(8)5(9)11-4(1)6(12)13/h(H2,10,11)(H,12,13)	212000	3.05651	3.63742
E500	2569-01-9	InChI=1S/C6H15NO3/c1-4(8)7(5(2)9)6(3)10/h4-6,8-10H,1-3H3/t4-,5-,6-/m0/s1	162000	2.96422	2.43784
E501	2702-72-9	InChI=1S/C8H6Cl2O3/c9-5-1-2-7(6(10)3-5)13-8(12)4-11/h1-3,11H,4H2	372100	2.77381	3.53455
E502	3323-53-3	InChI=1S/C6H16N2/c7-5-3-1-2-4-6-8/h1-8H2	90000	3.11098	2.88887
E503	3567-25-7	InChI=1S/C19H12Cl4N2O5S/c20-10-1-5-16(30-17-6-2-11(21)8-18(17)31(27,28)29)15(7-10)25-19(26)24-12-3-4-13(22)14(23)9-12/h1-9H,(H2,24,25,26)(H,27,28,29)	9300	4.74934	3.45423
E504	4016-24-4	InChI=1S/C18H36O5S/c1-3-5-6-7-8-9-10-11-12-13-14-15-16-17(24(20,21)22)18(19)23-4-2/h17H,3-16H2,1-2H3,(H,20,21,22)/t17-/m0/s1	1240	5.46832	3.99799
E505	4097-33-0	InChI=1S/C14H20N2O5/c1-2-3-4-5-6-7-8-11-9-12(15(18)19)14(17)13(10-11)16(20)21/h9-10,17H,2-8H2,1H3	26	7.05679	5.16988
E506	4685-14-7	InChI=1S/C12H14N2/c1-13-7-3-11(4-8-13)12-5-9-14(2)10-6-12/h3-10H,1-2H3/q+2	3599.82	4.71382	3.15138
E507	5015-75-8	InChI=1S/C6H5BrO3S/c7-5-1-3-6(4-2-5)11(8,9)10/h1-4H,(H,8,9,10)	1943000	2.08641	3.80378
E508	5064-31-3	InChI=1S/C6H9NO6/c8-4(9)1-7(2-5(10)11)3-6(12)13/h1-3H2,(H,8,9)(H,10,11)(H,12,13)	780000	2.38925	2.62447
E509	5137-55-3	InChI=1S/C25H54N/c1-5-8-11-14-17-20-23-26(4,24-21-18-15-12-9-6-2)25-22-19-16-13-10-7-3/h5-25H2,1-4H3/q+1	52	6.85067	1.36311
E510	5138-90-9	InChI=1S/C6H5ClO3S/c7-5-1-3-6(4-2-5)11(8,9)10/h1-4H,(H,8,9,10)	7.659e+06	1.40053	3.53908
E511	5138-93-2	InChI=1S/C6H4Cl2O3S/c7-4-1-2-5(8)6(3-4)12(9,10)11/h1-3H,(H,9,10,11)	4.931e+06	1.66322	3.87136
E512	5871-17-0	InChI=1S/C4H11O3PS/c1-3-6-8(5,9)7-4-2/h3-4H2,1-2H3,(H,5,9)	100000	3.23088	4.40912
E513	7173-51-5	InChI=1S/C22H48N/c1-5-7-9-11-13-15-17-19-21-23(3,4)22-20-18-16-14-12-10-8-6-2/h5-22H2,1-4H3/q+1	160	6.30993	2.09452
E514	7722-88-5	InChI=1S/H4O7P2/c1-8(2,3)7-9(4,5)6/h(H2,1,2,3)(H2,4,5,6)	391000	2.65818	2.2418
E515	7745-89-3	InChI=1S/C7H8ClN/c1-5-2-3-6(9)4-7(5)8/h2-4H,9H2,1H3	1600	4.94694	3.8057
E516	8001-54-5	InChI=1S/C23H42N/c1-4-5-6-7-8-9-10-11-12-13-14-18-21-24(2,3)22-23-19-16-15-17-20-23/h15-17,19-20H,4-14,18,21-22H2,1-3H3/q+1	110	6.48051	4.4166
E517	8004-87-3	InChI=1S/C24H28N3/c1-25-21-12-6-18(7-13-21)24(19-8-14-22(15-9-19)26(2)3)20-10-16-23(17-11-20)27(4)5/h6-17,25H,1-5H3/q+1	420000	2.93124	6.4027
E518	8044-71-1	InChI=1S/C17H38N/c1-5-6-7-8-9-10-11-12-13-14-15-16-17-18(2,3)4/h5-17H2,1-4H3/q+1	22	7.06665	3.58978
E519	17090-79-8	InChI=1S/C36H62O11/c1-10-34(31-20(3)16-26(43-31)28-19(2)15-21(4)36(41,18-37)46-28)12-11-27(44-34)33(8)13-14-35(47-33)17-25(38)22(5)30(45-35)23(6)29(42-9)24(7)32(39)40/h19-31,37-38,41H,10-18H2,1-9H3,(H,39,40)/t19-,20-,21+,22-,23-,24-,25-,26-,27+,28-,29+,30-,31-,33+,34+,35-,36-/m0/s1	10700	4.79726	3.10802
E520	17439-94-0	InChI=1S/C8H10O5/c9-7(10)5-3-1-2-4(13-3)6(5)8(11)12/h3-6H,1-2H2,(H,9,10)(H,11,12)/t3-,4+,5-,6-/m0/s1	92000	3.3061	2.84817
E521	23282-55-5	InChI=1S/C10H9ClN4O2S/c11-9-5-6-10(14-13-9)15-18(16,17)8-3-1-7(12)2-4-8/h1-6H,12H2,(H,14,15,16,17)	375300	2.88004	3.94211
E522	24307-26-4	InChI=1S/C7H16N/c1-8(2)6-4-3-5-7-8/h3-7H2,1-2H3/q+1	68500	3.22201	2.66728
E523	25155-30-0	InChI=1S/C18H30O3S/c1-2-3-4-5-6-7-8-9-10-11-14-17-15-12-13-16-18(17)22(19,20)21/h12-13,15-16H,2-11,14H2,1H3,(H,19,20,21)	9546	4.53405	5.11251
E524	25954-13-6	InChI=1S/C3H8NO4P/c1-2-8-9(6,7)3(4)5/h2H2,1H3,(H2,4,5)(H,6,7)	1524000	2.00192	3.16438
E525	29457-72-5	InChI=1S/C8HF17O3S/c9-1(10,3(13,14)5(17,18)7(21,22)23)2(11,12)4(15,16)6(19,20)8(24,25)29(26,27)28/h(H,26,27,28)	67000	3.87301	4.31808
E526	33245-39-5	InChI=1S/C12H13ClF3N3O4/c1-2-4-17(5-3-13)11-9(18(20)21)6-8(12(14,15)16)7-10(11)19(22)23/h6-7H,2-5H2,1H3	560	5.80289	5.90924
E527	34128-01-3	InChI=1S/C6H8O7/c7-4(8)1-3(6(11)12)13-2-5(9)10/h3H,1-2H2,(H,7,8)(H,9,10)(H,11,12)/t3-/m1/s1	1400000	2.13745	2.06385
E528	36362-09-1	InChI=1S/C12H27NS/c1-2-3-4-5-6-7-8-9-11-14-12-10-13/h2-13H2,1H3	33	6.81877	5.38095
E529	43222-48-6	InChI=1S/C17H17N2/c1-18-16(14-9-5-3-6-10-14)13-17(19(18)2)15-11-7-4-8-12-15/h3-13H,1-2H3/q+1	2630	4.97682	4.69358
E530	51580-86-0	InChI=1S/C3HCl2N3O3/c4-7-1(9)6-2(10)8(5)3(7)11/h(H,6,9,10)	215	5.96415	2.58307
E531	52508-35-7	InChI=1S/C12H18O7/c1-10(2)15-5-6-7(17-10)8-12(16-6,9(13)14)19-11(3,4)18-8/h6-8H,5H2,1-4H3,(H,13,14)/t6-,7+,8-,12+/m0/s1	1e+07	1.43817	2.27504
E532	55635-13-7	InChI=1S/C17H25NO5/c1-6-8-11(18-23-9-7-2)13-12(19)10-17(3,4)14(15(13)20)16(21)22-5/h7,14,18H,2,6,8-10H2,1,3-5H3/t14-/m0/s1	502000	2.80901	4.30209
E533	62476-59-9	InChI=1S/C14H7ClF3NO5/c15-10-5-7(14(16,17)18)1-4-12(10)24-8-2-3-11(19(22)23)9(6-8)13(20)21/h1-6H,(H,20,21)	77000	3.67181	4.6574
E534	67233-85-6	InChI=1S/C7H7NO4/c1-12-7-3-2-5(8(10)11)4-6(7)9/h2-4,9H,1H3	71100	3.37636	4.87816
E535	68783-78-8	InChI=1S/C37H74N/c1-5-7-9-11-13-15-17-19-21-23-25-27-29-31-33-35-37-38(3,4)36-34-32-30-28-26-24-22-20-18-16-14-12-10-8-6-2/h19-22H,5-18,23-37H2,1-4H3/q+1/b21-19+,22-20+	490	6.03652	0.282823
E536	68786-66-3	InChI=1S/C14H9Cl3N2OS/c1-21-14-18-9-5-8(16)12(6-10(9)19-14)20-11-4-2-3-7(15)13(11)17/h2-6H,1H3,(H,18,19)	133000	3.43204	7.038
E537	71048-99-2	InChI=1S/C11H22N3O6P/c1-6(9(15)14-7(2)11(17)18)13-10(16)8(12)4-5-21(3,19)20/h6-8H,4-5,12H2,1-3H3,(H,13,16)(H,14,15)(H,17,18)(H,19,20)/t6-,7+,8-/m1/s1	5000000	1.81061	2.47012
E538	71751-41-2	InChI=1S/C48H72O14/c1-11-25(2)43-28(5)17-18-47(62-43)23-34-20-33(61-47)16-15-27(4)42(26(3)13-12-14-32-24-55-45-40(49)29(6)19-35(46(51)58-34)48(32,45)52)59-39-22-37(54-10)44(31(8)57-39)60-38-21-36(53-9)41(50)30(7)56-38/h12-15,17-19,25-26,28,30-31,33-45,49-50,52H,11,16,20-24H2,1-10H3/b13-12-,27-15-,32-14-/t25-,26-,28-,30+,31-,33-,34+,35+,36+,37+,38+,39-,40+,41-,42-,43-,44+,45+,47-,48-/m0/s1	340	6.40957	2.58002
E539	76639-94-6	InChI=1S/C12H14Cl2FNO4S/c1-21(19,20)8-4-2-7(3-5-8)10(17)9(6-15)16-12(18)11(13)14/h2-5,9-11,17H,6H2,1H3,(H,16,18)/t9-,10-/m1/s1	330000	3.03563	3.83762
E540	77182-82-2	InChI=1S/C5H12NO4P/c1-11(9,10)3-2-4(6)5(7)8/h4H,2-3,6H2,1H3,(H,7,8)(H,9,10)/t4-/m1/s1	668000	2.43321	2.60979
E541	79917-90-1	InChI=1S/C8H15N2/c1-3-4-5-10-7-6-9(2)8-10/h6-8H,3-5H2,1-2H3/q+1	14800	3.97343	3.3095
E542	80474-14-2	InChI=1S/C25H31F3O5S/c1-5-20(31)33-25(21(32)34-12-26)13(2)8-15-16-10-18(27)17-9-14(29)6-7-22(17,3)24(16,28)19(30)11-23(15,25)4/h6-7,9,13,15-16,18-19,30H,5,8,10-12H2,1-4H3/t13-,15+,16+,18+,19+,22+,23+,24+,25+/m1/s1	550	5.9591	4.66574
E543	82752-99-6	InChI=1S/C25H32ClN5O2/c1-2-24-27-31(25(32)30(24)18-19-33-23-10-4-3-5-11-23)13-7-12-28-14-16-29(17-15-28)22-9-6-8-21(26)20-22/h3-6,8-11,20H,2,7,12-19H2,1H3	7000	4.82701	6.20904
E544	89365-50-4	InChI=1S/C25H37NO4/c27-20-23-18-22(13-14-24(23)28)25(29)19-26-15-7-1-2-8-16-30-17-9-6-12-21-10-4-3-5-11-21/h3-5,10-11,13-14,18,25-29H,1-2,6-9,12,15-17,19-20H2/t25-/m0/s1	20000	4.31761	3.9955
E545	89987-06-4	InChI=1S/C7H9ClO6P2S/c8-5-1-3-6(4-2-5)17-7(15(9,10)11)16(12,13)14/h1-4,7H,(H2,9,10,11)(H2,12,13,14)	320000	2.99811	2.2106
E546	98319-26-7	InChI=1S/C23H36N2O2/c1-21(2,3)25-20(27)17-8-7-15-14-6-9-18-23(5,13-11-19(26)24-18)16(14)10-12-22(15,17)4/h11,13-18H,6-10,12H2,1-5H3,(H,24,26)(H,25,27)/t14?,15?,16-,17?,18?,22-,23+/m0/s1	21450.2	4.23975	4.94675
E547	100286-97-3	InChI=1S/C12H9N3O/c1-8-11(9-2-4-14-5-3-9)6-10(7-13)12(16)15-8/h2-6H,1H3,(H,15,16)	414000	2.70773	3.37669
E548	101312-92-9	InChI=1S/C31H52N2O5S/c1-10-29(8)15-22(38-23(35)16-39-28(6,7)17-33-27(37)24(32)18(2)3)30(9)19(4)11-13-31(20(5)26(29)36)14-12-21(34)25(30)31/h10,18-20,22,24-26,36H,1,11-17,32H2,2-9H3,(H,33,37)/t19-,20-,22+,24-,25-,26-,29+,30-,31-/m0/s1	44700	4.1016	3.55043
E549	103628-48-4	InChI=1S/C14H21N3O2S/c1-15-20(18,19)10-11-4-5-14-13(8-11)12(9-16-14)6-7-17(2)3/h4-5,8-9,15-16H,6-7,10H2,1-3H3	290004	3.00801	4.01573
E550	103639-04-9	InChI=1S/C18H19N3O/c1-12-19-9-10-21(12)11-13-7-8-16-17(18(13)22)14-5-3-4-6-15(14)20(16)2/h3-6,9-10,13H,7-8,11H2,1-2H3/t13-/m0/s1	28000	4.02025	4.76875
E551	103775-10-6	InChI=1S/C27H34N2O7/c1-5-36-27(33)21(12-11-18-9-7-6-8-10-18)28-17(2)25(30)29-16-20-15-24(35-4)23(34-3)14-19(20)13-22(29)26(31)32/h6-10,14-15,17,21-22,28H,5,11-13,16H2,1-4H3,(H,31,32)/t17-,21-,22-/m0/s1	800000	2.79463	3.68159
E552	104227-87-4	InChI=1S/C14H19N5O4/c1-9(20)22-6-11(7-23-10(2)21)3-4-19-8-17-12-5-16-14(15)18-13(12)19/h5,8,11H,3-4,6-7H2,1-2H3,(H2,15,16,18)	820132	2.59307	3.28482
E553	113507-06-5	InChI=1S/C37H53NO8/c1-21(2)14-25(6)33-26(7)31(38-42-8)19-36(46-33)18-29-17-28(45-36)13-12-23(4)15-22(3)10-9-11-27-20-43-34-32(39)24(5)16-30(35(40)44-29)37(27,34)41/h9-12,14,16,21-22,26,28-30,32-34,39,41H,13,15,17-20H2,1-8H3/b10-9-,23-12-,25-14+,27-11?,38-31+/t22-,26-,28?,29-,30?,32+,33-,34+,36-,37+/m0/s1	0.03	10.3289	3.47096
E554	114798-26-4	InChI=1S/C22H23ClN6O/c1-2-3-8-20-24-21(23)19(14-30)29(20)13-15-9-11-16(12-10-15)17-6-4-5-7-18(17)22-25-27-28-26-22/h4-7,9-12,30H,2-3,8,13-14H2,1H3,(H,25,26,27,28)	331000	3.10642	4.31787
E555	121451-02-3	InChI=1S/C17H7Cl2F9N2O3/c18-5-4-8(29-15(32)30-13(31)9-6(20)2-1-3-7(9)21)11(22)10(19)12(5)33-17(27,28)14(23)16(24,25)26/h1-4,14H,(H2,29,30,31,32)/t14-/m1/s1	3110	5.23081	8.57821
E556	123343-16-8	InChI=1S/C13H11ClN2O4S/c1-19-9-6-10(20-2)16-13(15-9)21-8-5-3-4-7(14)11(8)12(17)18/h3-6H,1-2H3,(H,17,18)	1.1e+06	2.47283	3.31016
E557	130693-82-2	InChI=1S/C10H16N2O4S3/c1-3-12-8-4-6(2)18(13,14)10-7(8)5-9(17-10)19(11,15)16/h5-6,8,12H,3-4H2,1-2H3,(H2,11,15,16)/t6-,8-/m1/s1	699000	2.66666	4.2347
E558	159628-36-1	InChI=1S/C49H73NO14/c1-25(2)43-28(5)17-18-48(64-43)23-35-20-34(63-48)16-15-27(4)44(26(3)13-12-14-33-24-57-46-42(52)29(6)19-36(47(53)60-35)49(33,46)54)61-40-22-38(56-11)45(31(8)59-40)62-39-21-37(55-10)41(30(7)58-39)50-32(9)51/h12-15,17-19,25-26,28,30-31,34-46,52,54H,16,20-24H2,1-11H3,(H,50,51)/b13-12-,27-15-,33-14?/t26?,28-,30-,31-,34+,35-,36+,37+,38-,39?,40-,41+,42+,43-,44-,45-,46+,48+,49+/m0/s1	0.45	9.30108	2.37751
E559	199119-58-9	InChI=1S/C14H14F3N5O6S/c1-26-9-6-10(27-2)20-12(19-9)21-13(23)22-29(24,25)11-8(4-3-5-18-11)28-7-14(15,16)17/h3-6H,7H2,1-2H3,(H2,19,20,21,22,23,24,25)	108000	3.60741	3.65809
E560	274671-61-3	InChI=1S/C14H23NO/c1-4-15(5-2)10-11-16-12-14-8-6-13(3)7-9-14/h6-9H,4-5,10-12H2,1-3H3	2400	4.96485	4.18443
E561	50-52-2	InChI=1S/C21H26N2S2/c1-22-13-6-5-7-16(22)12-14-23-18-8-3-4-9-20(18)25-21-11-10-17(24-2)15-19(21)23/h3-4,8-11,15-16H,5-7,12-14H2,1-2H3/t16-/m1/s1	3705.75	5	5.80843
E562	50-63-5	InChI=1S/C18H26ClN3/c1-4-22(5-2)12-6-7-14(3)21-17-10-11-20-18-13-15(19)8-9-16(17)18/h8-11,13-14H,4-7,12H2,1-3H3,(H,20,21)/t14-/m0/s1	6397.44	4.69897	5.38909
E563	50-78-2	InChI=1S/C9H8O4/c1-6(10)13-8-5-3-2-4-7(8)9(11)12/h2-5H,1H3,(H,11,12)	127913	3.14874	3.18295
E564	51-21-8	InChI=1S/C4H3FN2O2/c5-2-1-6-4(9)7-3(2)8/h1H,(H2,6,7,8,9)	26176.5	3.69629	3.32866
E565	51-52-5	InChI=1S/C7H10N2OS/c1-2-3-5-4-6(10)9-7(11)8-5/h4H,2-3H2,1H3,(H2,8,9,10,11)	10213.9	4.22185	3.61864
E566	52-24-4	InChI=1S/C6H12N3PS/c11-10(7-1-2-7,8-3-4-8)9-5-6-9/h1-6H2	546184	2.53962	3.94353
E567	54-11-5	InChI=1S/C10H14N2/c1-12-7-3-5-10(12)9-4-2-6-11-8-9/h2,4,6,8,10H,3,5,7H2,1H3/t10-/m0/s1	3460.47	4.671	3.89208
E568	54-85-3	InChI=1S/C6H7N3O/c7-9-6(10)5-1-3-8-4-2-5/h1-4H,7H2,(H,9,10)	50347.6	3.43518	3.01719
E569	57-62-5	InChI=1S/C22H23ClN2O8/c1-21(32)7-6-8-15(25(2)3)17(28)13(20(24)31)19(30)22(8,33)18(29)11(7)16(27)12-10(26)5-4-9(23)14(12)21/h4-5,7-8,15,26,28-29,32-33H,6H2,1-3H3,(H2,24,31)/t7?,8?,15-,21+,22-/m1/s1	115382	3.61809	3.50664
E570	57-68-1	InChI=1S/C12H14N4O2S/c1-8-7-9(2)15-12(14-8)16-19(17,18)11-5-3-10(13)4-6-11/h3-7H,13H2,1-2H3,(H,14,15,16)	102508	3.4338	3.09229
E571	58-08-2	InChI=1S/C8H10N4O2/c1-10-4-9-6-5(10)7(13)12(3)8(14)11(6)2/h4H,1-3H3	233696	2.91958	2.85381
E572	58-14-0	InChI=1S/C12H13ClN4/c1-2-9-10(11(14)17-12(15)16-9)7-3-5-8(13)6-4-7/h3-6H,2H2,1H3,(H4,14,15,16,17)	5525.93	4.65329	4.53227
E573	58-22-0	InChI=1S/C19H28O2/c1-18-9-7-13(20)11-12(18)3-4-14-15-5-6-17(21)19(15,2)10-8-16(14)18/h11,14-17,21H,3-10H2,1-2H3/t14-,15?,16-,17-,18-,19-/m0/s1	2417.11	5.07673	4.99939
E574	58-55-9	InChI=1S/C7H8N4O2/c1-10-5-4(8-3-9-5)6(12)11(2)7(10)13/h3H,1-2H3,(H,8,9)	412011	2.64076	2.95022
E575	59-40-5	InChI=1S/C14H12N4O2S/c15-10-5-7-11(8-6-10)21(19,20)18-14-9-16-12-3-1-2-4-13(12)17-14/h1-9H,15H2,(H,17,18)	132148	3.35655	3.5924
E576	59-87-0	InChI=1S/C6H8N4O4/c7-6(11)9-8-3-4-1-2-5(14-4)10(12)13/h1-3,12-13H,(H3,7,9,11)/b8-3+	28465.5	3.84704	2.19912
E577	64-19-7	InChI=1S/C2H4O2/c1-2(3)4/h1H3,(H,3,4)	62428.1	2.98315	2.2653
E578	66-25-1	InChI=1S/C6H12O/c1-2-3-4-5-6-7/h6H,2-5H2,1H3	8488.41	4.07186	3.85184
E579	68-22-4	InChI=1S/C20H26O2/c1-3-20(22)11-9-18-17-6-4-13-12-14(21)5-7-15(13)16(17)8-10-19(18,20)2/h1,12,15-18,22H,4-11H2,2H3/t15?,16-,17-,18+,19+,20?/m1/s1	5284.19	4.75185	4.81979
E580	68-35-9	InChI=1S/C10H10N4O2S/c11-8-2-4-9(5-3-8)17(15,16)14-10-12-6-1-7-13-10/h1-7H,11H2,(H,12,13,14)	183618	3.13451	3.16878
E581	71-63-6	InChI=1S/C41H64O13/c1-20-36(46)29(42)16-34(49-20)53-38-22(3)51-35(18-31(38)44)54-37-21(2)50-33(17-30(37)43)52-25-8-11-39(4)24(15-25)6-7-28-27(39)9-12-40(5)26(10-13-41(28,40)47)23-14-32(45)48-19-23/h14,20-22,24-31,33-38,42-44,46-47H,6-13,15-19H2,1-5H3/t20-,21+,22+,24+,25?,26-,27-,28+,29?,30+,31-,33-,34?,35-,36+,37+,38+,39-,40+,41-/m0/s1	99678.1	3.88503	2.89839
E582	72-14-0	InChI=1S/C9H9N3O2S2/c10-7-1-3-8(4-2-7)16(13,14)12-9-11-5-6-15-9/h1-6H,10H2,(H,11,12)	86139.3	3.47188	3.33302
E583	77-09-8	InChI=1S/C20H14O4/c21-15-9-5-13(6-10-15)20(14-7-11-16(22)12-8-14)18-4-2-1-3-17(18)19(23)24-20/h1-12,21-22H	6366.46	4.69897	3.51569
E584	91-66-7	InChI=1S/C10H15N/c1-3-11(4-2)10-8-6-5-7-9-10/h5-9H,3-4H2,1-2H3	1492.33	5	4.09857
E585	96-45-7	InChI=1S/C3H6N2S/c6-3-4-1-2-5-3/h1-2H2,(H2,4,5,6)	25849	3.59683	3.77689
E586	100-52-7	InChI=1S/C7H6O/c8-6-7-4-2-1-3-5-7/h1-6H	14679.4	3.8591	3.7529
E587	105-37-3	InChI=1S/C5H10O2/c1-3-5(6)7-4-2/h3-4H2,1-2H3	130876	2.8923	3.14734
E588	106-89-8	InChI=1S/C3H5ClO/c4-1-3-2-5-3/h3H,1-2H2/t3-/m1/s1	23142.2	3.60185	4.04046
E589	107-15-3	InChI=1S/C2H8N2/c3-1-2-4/h1-4H2	26432.7	3.35672	3.25562
E590	108-01-0	InChI=1S/C4H11NO/c1-5(2)3-4-6/h6H,3-4H2,1-2H3	98005.5	2.9588	2.19344
E591	108-95-2	InChI=1S/C6H6O/c7-6-4-2-1-3-5-6/h1-5,7H	7191.76	4.11681	3.54123
E592	110-15-6	InChI=1S/C4H6O4/c5-3(6)1-2-4(7)8/h1-2H2,(H,5,6)(H,7,8)	374269	2.49902	2.48638
E593	110-16-7	InChI=1S/C4H4O4/c5-3(6)1-2-4(7)8/h1-2H,(H,5,6)(H,7,8)/b2-1+	201579	2.76028	2.78567
E594	121-69-7	InChI=1S/C8H11N/c1-9(2)8-6-4-3-5-7-8/h3-7H,1-2H3	7039.15	4.23591	4.00595
E595	122-11-2	InChI=1S/C12H14N4O4S/c1-19-11-7-10(14-12(15-11)20-2)16-21(17,18)9-5-3-8(13)4-6-9/h3-7H,13H2,1-2H3,(H,14,15,16)	248132	3.09714	3.65702
E596	127-79-7	InChI=1S/C11H12N4O2S/c1-8-6-7-13-11(14-8)15-18(16,17)10-4-2-9(12)3-5-10/h2-7H,12H2,1H3,(H,13,14,15)	277519	2.97881	3.14735
E597	138-59-0	InChI=1S/C7H10O5/c8-4-1-3(7(11)12)2-5(9)6(4)10/h1,4-6,8-10H,2H2,(H,11,12)/t4-,5-,6-/m1/s1	116270	3.17546	2.34729
E598	152-11-4	InChI=1S/C27H38N2O4/c1-20(2)27(19-28,22-10-12-24(31-5)26(18-22)33-7)14-8-15-29(3)16-13-21-9-11-23(30-4)25(17-21)32-6/h9-12,17-18,20H,8,13-16H2,1-7H3/t27-/m1/s1	9092.04	4.69897	5.4538
E599	154-42-7	InChI=1S/C5H5N5S/c6-5-9-3-2(4(11)10-5)7-1-8-3/h1H,(H4,6,7,8,9,10,11)	16604.5	4.00299	4.57101
E600	298-46-4	InChI=1S/C15H12N2O/c16-15(18)17-13-7-3-1-5-11(13)9-10-12-6-2-4-8-14(12)17/h1-10H,(H2,16,18)	13980.6	4.22788	3.84382
E601	302-17-0	InChI=1S/C2H3Cl3O2/c3-2(4,5)1(6)7/h1,6-7H	502240	2.51763	2.61957
E602	341-69-5	InChI=1S/C18H23NO/c1-15-9-7-8-12-17(15)18(20-14-13-19(2)3)16-10-5-4-6-11-16/h4-12,18H,13-14H2,1-3H3/t18-/m0/s1	10775.2	4.39794	5.10594
E603	396-01-0	InChI=1S/C12H11N7/c13-9-7(6-4-2-1-3-5-6)16-8-10(14)18-12(15)19-11(8)17-9/h1-5H,(H6,13,14,15,17,18,19)	10060.3	4.40096	2.75623
E604	434-07-1	InChI=1S/C21H32O3/c1-19-11-13(12-22)18(23)10-14(19)4-5-15-16(19)6-8-20(2)17(15)7-9-21(20,3)24/h12,14-17,22,24H,4-11H2,1-3H3/b13-12-/t14?,15-,16+,17+,19+,20+,21+/m1/s1	9837.04	4.5289	4.87533
E605	439-14-5	InChI=1S/C16H13ClN2O/c1-19-14-8-7-12(17)9-13(14)16(18-10-15(19)20)11-5-3-2-4-6-11/h2-9H,10H2,1H3	5845.31	4.68764	3.78722
E606	440-17-5	InChI=1S/C21H24F3N3S/c1-25-11-13-26(14-12-25)9-4-10-27-17-5-2-3-6-19(17)28-20-8-7-16(15-18(20)27)21(22,23)24/h2-3,5-8,15H,4,9-14H2,1H3	4074.96	5	5.57595
E607	490-79-9	InChI=1S/C7H6O4/c8-4-1-2-6(9)5(3-4)7(10)11/h1-3,8-9H,(H,10,11)	60106.8	3.40894	2.53226
E608	504-24-5	InChI=1S/C5H6N2/c6-5-1-3-7-4-2-5/h1-4H,(H2,6,7)	3011.72	4.49484	3.14231
E609	525-66-6	InChI=1S/C16H21NO2/c1-12(2)17-10-14(18)11-19-16-9-5-7-13-6-3-4-8-15(13)16/h3-9,12,14,17-18H,10-11H2,1-2H3/t14-/m1/s1	3571.71	4.861	3.88941
E610	637-07-0	InChI=1S/C12H15ClO3/c1-4-15-11(14)12(2,3)16-10-7-5-9(13)6-8-10/h5-8H,4H2,1-3H3	16988.9	4.1549	4.37447
E611	723-46-6	InChI=1S/C10H11N3O3S/c1-7-6-10(12-16-7)13-17(14,15)9-4-2-8(11)3-5-9/h2-6H,11H2,1H3,(H,12,13)	110623	3.35975	3.40669
E612	738-70-5	InChI=1S/C14H18N4O3/c1-19-10-5-8(6-11(20-2)12(10)21-3)4-9-7-17-14(16)18-13(9)15/h5-7H,4H2,1-3H3,(H4,15,16,17,18)	107951	3.42965	3.2341
E613	768-94-5	InChI=1S/C10H17N/c11-10-4-7-1-8(5-10)3-9(2-7)6-10/h7-9H,1-6,11H2/t7-,8+,9-,10-	22687.3	3.82391	4.12447
E614	882-09-7	InChI=1S/C10H11ClO3/c1-10(2,9(12)13)14-8-5-3-7(11)4-6-8/h3-6H,1-2H3,(H,12,13)	72348.1	3.4723	3.63968
E615	1247-42-3	InChI=1S/C21H26O5/c1-19-7-5-13(23)9-12(19)3-4-14-15-6-8-21(26,17(25)11-22)20(15,2)10-16(24)18(14)19/h5,7,9,14-15,18,22,26H,3-4,6,8,10-11H2,1-2H3/t14-,15-,18+,19-,20-,21+/m0/s1	53764.2	3.82391	3.61621
E616	1401-69-0	InChI=1S/C46H77NO17/c1-13-33-30(22-58-45-42(57-12)41(56-11)37(52)26(5)60-45)18-23(2)14-15-31(49)24(3)19-29(16-17-48)39(25(4)32(50)20-34(51)62-33)64-44-38(53)36(47(9)10)40(27(6)61-44)63-35-21-46(8,55)43(54)28(7)59-35/h14-15,17-18,24-30,32-33,35-45,50,52-55H,13,16,19-22H2,1-12H3/b15-14-,23-18-/t24-,25?,26-,27+,28?,29-,30-,32+,33-,35-,36-,37+,38+,39+,40-,41?,42+,43?,44+,45-,46-/m0/s1	678957	3.1301	2.97244
E617	1622-61-3	InChI=1S/C15H12ClN3O3/c16-12-4-2-1-3-10(12)15-11-7-9(19(21)22)5-6-13(11)18-14(20)8-17-15/h1-7,21-22H,8H2,(H,18,20)	30892.2	4.01221	3.23396
E618	1665-48-1	InChI=1S/C12H15NO3/c1-8-3-9(2)5-10(4-8)15-7-11-6-13-12(14)16-11/h3-5,11H,6-7H2,1-2H3,(H,13,14)/t11-/m0/s1	75097.8	3.46926	3.81971
E619	2144-08-3	InChI=1S/C7H6O4/c8-3-4-1-2-5(9)7(11)6(4)10/h1-3,9-11H	32695.7	3.67337	2.35603
E620	2741-06-2	InChI=1S/C9H12N2S/c1-2-10-9(12)11-8-6-4-3-5-7-8/h3-7H,2H2,1H3,(H2,10,11,12)	81121.5	3.34679	3.76881
E621	3930-20-9	InChI=1S/C12H20N2O3S/c1-9(2)13-8-12(15)10-4-6-11(7-5-10)14-18(3,16)17/h4-7,9,12-15H,8H2,1-3H3/t12-/m1/s1	299810	2.9583	3.72719
E622	5251-34-3	InChI=1S/C21H25ClO5/c1-19-5-3-11(24)7-14(19)15(22)8-12-13-4-6-21(27,17(26)10-23)20(13,2)9-16(25)18(12)19/h3,5,7-8,12-13,16,18,23,25,27H,4,6,9-10H2,1-2H3/t12-,13?,16-,18+,19-,20-,21-/m0/s1	43097.3	3.9598	3.62792
E623	6700-34-1	InChI=1S/C19H27NO/c1-20-10-9-19-8-4-3-5-17(19)18(20)12-14-6-7-16(21-2)11-15(14)13-19/h6-7,11,17-18H,3-5,8-10,12-13H2,1-2H3/t17-,18+,19-/m1/s1	14271.2	4.30103	4.89595
E624	9002-92-0	InChI=1S/C14H30O2/c1-2-3-4-5-6-7-8-9-10-11-13-16-14-12-15/h15H,2-14H2,1H3	4607.74	4.69897	4.22573
E625	13035-61-5	InChI=1S/C12H16O9/c1-6(14)18-10-9(4-17-5-13)21-12(20-8(3)16)11(10)19-7(2)15/h5,9-12H,4H2,1-3H3/t9?,10-,11?,12-/m1/s1	118658	3.40894	3.86121
E626	13710-19-5	InChI=1S/C14H12ClNO2/c1-9-11(15)6-4-8-12(9)16-13-7-3-2-5-10(13)14(17)18/h2-8,16H,1H3,(H,17,18)	7851.12	4.52288	3.83842
E627	15307-79-6	InChI=1S/C14H11Cl2NO2/c15-10-5-3-6-11(16)14(10)17-12-7-2-1-4-9(12)8-13(18)19/h1-7,17H,8H2,(H,18,19)	44365.2	3.82447	3.84003
E628	17321-77-6	InChI=1S/C19H23ClN2/c1-21(2)12-5-13-22-18-7-4-3-6-15(18)8-9-16-10-11-17(20)14-19(16)22/h3-4,6-7,10-11,14H,5,8-9,12-13H2,1-2H3	3148.52	5	6.24376
E629	22071-15-4	InChI=1S/C16H14O3/c1-11(16(18)19)13-8-5-9-14(10-13)15(17)12-6-3-2-4-7-12/h2-11H,1H3,(H,18,19)/t11-/m0/s1	63863.4	3.60006	3.63084
E630	22204-88-2	InChI=1S/C16H25NO2/c1-17(2)12-14-7-4-5-10-16(14,18)13-8-6-9-15(11-13)19-3/h6,8-9,11,14,18H,4-5,7,10,12H2,1-3H3/t14?,16-/m0/s1	73745	3.55284	3.90073
E631	22664-55-7	InChI=1S/C17H27NO4/c1-10(2)18-8-15(20)9-21-16-7-11(3)17(22-14(6)19)13(5)12(16)4/h7,10,15,18,20H,8-9H2,1-6H3/t15-/m1/s1	37292.1	3.91891	3.52622
E632	25812-30-0	InChI=1S/C15H22O3/c1-11-6-7-12(2)13(10-11)18-9-5-8-15(3,4)14(16)17/h6-7,10H,5,8-9H2,1-4H3,(H,16,17)	10013.3	4.39794	4.25064
E633	27589-33-9	InChI=1S/C12H11ClN6O2S2/c13-9-5-10(15-6-7-2-1-3-22-7)8(12-16-18-19-17-12)4-11(9)23(14,20)21/h1-5,15H,6H2,(H2,14,20,21)(H,16,17,18,19)	66750.8	3.74473	4.08991
E634	35554-44-0	InChI=1S/C14H14Cl2N2O/c1-2-7-19-14(9-18-6-5-17-10-18)12-4-3-11(15)8-13(12)16/h2-6,8,10,14H,1,7,9H2/t14-/m1/s1	3235.9	4.96302	4.83725
E635	37517-30-9	InChI=1S/C18H28N2O4/c1-5-6-18(23)20-14-7-8-17(16(9-14)13(4)21)24-11-15(22)10-19-12(2)3/h7-9,12,15,19,22H,5-6,10-11H2,1-4H3,(H,20,23)/t15-/m1/s1	50750.7	3.82145	4.0149
E636	41859-67-0	InChI=1S/C19H20ClNO4/c1-19(2,18(23)24)25-16-9-3-13(4-10-16)11-12-21-17(22)14-5-7-15(20)8-6-14/h3-10H,11-12H2,1-2H3,(H,21,22)(H,23,24)	28945.5	4.09691	3.53171
E637	42017-89-0	InChI=1S/C17H15ClO4/c1-17(2,16(20)21)22-14-9-5-12(6-10-14)15(19)11-3-7-13(18)8-4-11/h3-10H,1-2H3,(H,20,21)	6375.04	4.69897	3.78379
E638	42399-41-7	InChI=1S/C22H26N2O4S/c1-15(25)28-20-21(16-9-11-17(27-4)12-10-16)29-19-8-6-5-7-18(19)24(22(20)26)14-13-23(2)3/h5-12,20-21H,13-14H2,1-4H3/t20-,21+/m1/s1	28508.1	4.16257	4.317
E639	42835-25-6	InChI=1S/C14H12FNO3/c1-7-2-3-8-4-9(15)5-10-12(8)16(7)6-11(13(10)17)14(18)19/h4-7H,2-3H2,1H3,(H,18,19)/t7-/m0/s1	60087	3.63827	4.26948
E640	51384-51-1	InChI=1S/C15H25NO3/c1-12(2)16-10-14(17)11-19-15-6-4-13(5-7-15)8-9-18-3/h4-7,12,14,16-17H,8-11H2,1-3H3/t14-/m1/s1	64033.7	3.62069	3.56755
E641	57775-29-8	InChI=1S/C18H22N2O2/c1-12(2)19-10-13(21)11-22-17-9-5-8-16-18(17)14-6-3-4-7-15(14)20-16/h3-9,12-13,19-21H,10-11H2,1-2H3/t13-/m0/s1	14850.8	4.30302	3.94669
E642	63675-72-9	InChI=1S/C20H26N2O6/c1-11(2)10-28-20(24)17-13(4)21-12(3)16(19(23)27-5)18(17)14-8-6-7-9-15(14)22(25)26/h6-9,11,18,21,25-26H,10H2,1-5H3	33707.3	4.06382	3.56092
E643	64137-52-6	InChI=1S/C11H15N3/c1-12-8-4-7-11-13-9-5-2-3-6-10(9)14-11/h2-3,5-6,12H,4,7-8H2,1H3,(H,13,14)	47314.2	3.60206	3.67886
E644	66357-35-5	InChI=1S/C13H24N4O3S/c1-14-13(9-17(18)19)15-6-7-21-10-12-5-4-11(20-12)8-16(2)3/h4-5,9,14-15,18-19H,6-8,10H2,1-3H3/b13-9+	652177	2.6859	3.01148
E645	70458-96-7	InChI=1S/C16H18FN3O3/c1-2-19-9-11(16(22)23)15(21)10-7-12(17)14(8-13(10)19)20-5-3-18-4-6-20/h7-9,18H,2-6H2,1H3,(H,22,23)	188405	3.22915	3.70425
E646	73231-34-2	InChI=1S/C12H14Cl2FNO4S/c1-21(19,20)8-4-2-7(3-5-8)10(17)9(6-15)16-12(18)11(13)14/h2-5,9-11,17H,6H2,1H3,(H,16,18)/t9-,10-/m1/s1	336720	3.02687	3.85753
E647	73334-07-3	InChI=1S/C18H24I3N3O8/c1-24(4-9(28)6-26)18(31)12-13(19)11(17(30)22-3-8(27)5-25)14(20)16(15(12)21)23-10(29)7-32-2/h8-9,25-28H,3-7H2,1-2H3,(H,22,30)(H,23,29)/t8-,9?/m1/s1	1.01262e+06	2.89279	2.35929
E648	73590-58-6	InChI=1S/C17H19N3O3S/c1-10-8-18-15(11(2)16(10)23-4)9-24(21)17-19-13-6-5-12(22-3)7-14(13)20-17/h5-8H,9H2,1-4H3,(H,19,20)	87441.9	3.59662	3.43524
E649	76470-66-1	InChI=1S/C16H16ClN3O4/c17-9-6-7-10-12(15(22)20(10)13(9)16(23)24)19-14(21)11(18)8-4-2-1-3-5-8/h1-5,10-12H,6-7,18H2,(H,19,21)(H,23,24)/t10-,11+,12+/m1/s1	965362	2.55909	2.70697
E650	76824-35-6	InChI=1S/C8H15N7O2S3/c9-6(15-20(12,16)17)1-2-18-3-5-4-19-8(13-5)14-7(10)11/h4H,1-3H2,(H2,9,15)(H2,12,16,17)(H4,10,11,13,14)	398159	2.92815	4.28916
E651	78246-49-8	InChI=1S/C19H20FNO3/c20-15-3-1-13(2-4-15)17-7-8-21-10-14(17)11-22-16-5-6-18-19(9-16)24-12-23-18/h1-6,9,14,17,21H,7-8,10-12H2/t14-,17?/m0/s1	6587.3	4.69897	4.90779
E652	83647-97-6	InChI=1S/C22H30N2O5S2/c1-3-29-21(28)17(10-9-16-7-5-4-6-8-16)23-15(2)19(25)24-14-22(30-11-12-31-22)13-18(24)20(26)27/h4-8,15,17-18,23H,3,9-14H2,1-2H3,(H,26,27)/t15?,17-,18-/m0/s1	933228	2.69897	3.76749
E653	93106-60-6	InChI=1S/C19H22FN3O3/c1-2-21-5-7-22(8-6-21)17-10-16-13(9-15(17)20)18(24)14(19(25)26)11-23(16)12-3-4-12/h9-12H,2-8H2,1H3,(H,25,26)	21563.7	4.22185	3.94369
E654	96829-58-2	InChI=1S/C30H55NO5/c1-5-7-9-11-12-13-14-15-16-18-25(35-30(34)27(31-23-32)21-20-24(3)4)22-28-26(29(33)36-28)19-17-10-8-6-2/h23-28H,5-22H2,1-4H3,(H,31,32)/t25-,26-,27-,28-/m0/s1	5097.61	5	2.23602
E655	98079-51-7	InChI=1S/C17H19F2N3O3/c1-3-21-8-11(17(24)25)16(23)10-6-12(18)15(13(19)14(10)21)22-5-4-20-9(2)7-22/h6,8-9,20H,3-5,7H2,1-2H3,(H,24,25)/t9-/m1/s1	129969	3.4319	3.93088
E656	106266-06-2	InChI=1S/C23H27FN4O2/c1-15-18(23(29)28-10-3-2-4-21(28)25-15)9-13-27-11-7-16(8-12-27)22-19-6-5-17(24)14-20(19)30-26-22/h5-6,14,16H,2-4,7-13H2,1H3	5368.95	4.88341	4.37157
E657	107007-99-8	InChI=1S/C18H24N4O/c1-21-13-6-5-7-14(21)11-12(10-13)19-18(23)17-15-8-3-4-9-16(15)22(2)20-17/h3-4,8-9,12-14H,5-7,10-11H2,1-2H3,(H,19,23)/t12-,13+,14-	21868.6	4.1549	4.46426
E658	127779-20-8	InChI=1S/C38H50N6O5/c1-38(2,3)43-37(49)32-20-26-14-7-8-15-27(26)22-44(32)23-33(45)30(19-24-11-5-4-6-12-24)41-36(48)31(21-34(39)46)42-35(47)29-18-17-25-13-9-10-16-28(25)40-29/h4-6,9-13,16-18,26-27,30-33,45H,7-8,14-15,19-23H2,1-3H3,(H2,39,46)(H,41,48)(H,42,47)(H,43,49)/t26-,27-,30+,31+,32+,33?/m1/s1	34784.2	4.28524	2.94007
E659	154361-50-9	InChI=1S/C15H22FN3O6/c1-3-4-5-6-24-15(23)18-12-9(16)7-19(14(22)17-12)13-11(21)10(20)8(2)25-13/h7-8,10-11,13,20-21H,3-6H2,1-2H3,(H,17,18,22,23)/t8?,10?,11-,13-/m1/s1	850926	2.62563	3.07832
E660	224452-66-8	InChI=1S/C30H47NO4S/c1-7-28(4)16-24(35-25(33)17-36-22-14-20-8-9-21(15-22)31(20)6)29(5)18(2)10-12-30(19(3)27(28)34)13-11-23(32)26(29)30/h7,18-22,24,26-27,34H,1,8-17H2,2-6H3/t18-,19+,20+,21+,24?,26+,27+,28+,29+,30-/m0/s1	40713.8	4.10439	3.83143

## Sheet: Table S3
Table S3. Y-randomization results after randomly shuffling the toxicity 20 times
No	Q2 shuffled	R2 shuffled
1	0.001201	0.004208
2	0.000657	0.009346
3	0.003617	0.003895
4	4.99e-06	0.007104
5	0.032343	0.000888
6	3.34e-09	0.006811
7	0.002789	0.003061
8	0.000421	0.004661
9	1.84e-05	0.005654
10	3.41e-05	0.006516
11	0.013459	0.001976
12	0.001932	0.011186
13	0.00615	0.002359
14	0.001637	0.003813
15	2.68e-05	0.006021
16	0.001399	0.004312
17	0.000535	0.004771
18	0.000708	0.008177
19	0.001383	0.00397
20	0.007109	0.001995

## Sheet: Table S4
Table S4. Defining applicability domain using Standardization approach for the evaluation set
Mol. ID	CAS	optimized_Inchi	LC50(ug/L)	Exp. pLC50	Pred. pLC50 by ACO-SVM	Applicability Domain Info.
E1	56-35-9	InChI=1S/6C4H9.O.2Sn/c6*1-3-4-2;;;/h6*1,3-4H2,2H3;;;	17.6952	7.52745	1.20463	Outside AD
E2	76-87-9	InChI=1S/3C6H5.H2O.Sn/c3*1-2-4-6-5-3-1;;/h3*1-5H;1H2;/q;;;;+1/p-1	16.4996	7.34722	2.49288	Outside AD
E6	112-85-6	InChI=1S/C22H44O2/c1-2-3-4-5-6-7-8-9-10-11-12-13-14-15-16-17-18-19-20-21-22(23)24/h2-21H2,1H3,(H,23,24)	16	7.3281	1.34695	Outside AD
E25	35597-43-4	InChI=1S/C11H22N3O6P/c1-6(9(15)14-7(2)11(17)18)13-10(16)8(12)4-5-21(3,19)20/h6-8H,4-5,12H2,1-3H3,(H,13,16)(H,14,15)(H,17,18)(H,19,20)/t6-,7-,8-/m0/s1	1e+06	2.50958	2.47012	Outside AD
E46	11141-17-6	InChI=1S/C35H44O16/c1-8-15(2)24(38)49-18-12-19(48-16(3)36)32(26(39)43-6)13-46-21-22(32)31(18)14-47-34(42,27(40)44-7)25(31)29(4,23(21)37)35-20-11-17(30(35,5)51-35)33(41)9-10-45-28(33)50-20/h8-10,17-23,25,28,37,41-42H,11-14H2,1-7H3/b15-8+/t17-,18-,19+,20+,21-,22-,23-,25-,28-,29+,30-,31-,32+,33+,34+,35-/m0/s1	624.838	6.062	2.73861	Outside AD
E51	75-25-2	InChI=1S/CHBr3/c2-1(3)4/h1H	45994.7	3.73995	3.8399	Outside AD
E63	74-83-9	InChI=1S/CH3Br/c1-2/h1H3	2407.67	4.59585	4.61371	Outside AD
E69	35723-83-2	InChI=1S/C39H81N/c1-37(2)31-25-19-13-7-10-16-22-28-34-40(35-29-23-17-11-8-14-20-26-32-38(3)4)36-30-24-18-12-9-15-21-27-33-39(5)6/h37-39H,7-36H2,1-6H3	618.487	5.96	0.169863	Outside AD
E70	57157-80-9	InChI=1S/C26H55N/c1-25(2)21-17-13-9-5-7-11-15-19-23-27-24-20-16-12-8-6-10-14-18-22-26(3)4/h25-27H,5-24H2,1-4H3	110.853	6.537	1.74251	Outside AD
E77	5964-62-5	InChI=1S/C32H34N4O4S/c1-19(2)27-17-29(21(5)15-31(27)37)35-33-23-7-11-25(12-8-23)41(39,40)26-13-9-24(10-14-26)34-36-30-18-28(20(3)4)32(38)16-22(30)6/h7-20,37-38H,1-6H3/b35-33+,36-34+	2072.09	5.44	3.03896	Outside AD
E103	96829-58-2	InChI=1S/C29H53NO5/c1-5-7-9-11-12-13-14-15-16-18-24(34-29(33)26(30-22-31)20-23(3)4)21-27-25(28(32)35-27)19-17-10-8-6-2/h22-27H,5-21H2,1-4H3,(H,30,31)/t24-,25-,26+,27-/m1/s1	7002.44	4.85	2.67971	Outside AD
E110	55406-53-6	InChI=1S/C8H12INO2/c1-2-3-6-10-8(11)12-7-4-5-9/h2-3,6-7H2,1H3,(H,10,11)	39.9442	6.84739	6.22368	Outside AD
E142	114-07-8	InChI=1S/C37H67NO13/c1-14-25-37(10,45)30(41)20(4)27(39)18(2)16-35(8,44)32(51-34-28(40)24(38(11)12)15-19(3)47-34)21(5)29(22(6)33(43)49-25)50-26-17-36(9,46-13)31(42)23(7)48-26/h18-26,28-32,34,40-42,44-45H,14-17H2,1-13H3/t18-,19-,20-,21-,22-,23+,24-,25+,26+,28+,29-,30+,31-,32+,34+,35-,36-,37+/m0/s1	207854	3.54789	4.28135	Outside AD
E143	83905-01-5	InChI=1S/C38H72N2O12/c1-15-27-38(10,46)31(42)24(6)40(13)19-20(2)17-36(8,45)33(52-35-29(41)26(39(11)12)16-21(3)48-35)22(4)30(23(5)34(44)50-27)51-28-18-37(9,47-14)32(43)25(7)49-28/h20-33,35,41-43,45-46H,15-19H2,1-14H3/t20-,21+,22-,23+,24-,25-,26+,27+,28+,29-,30+,31-,32-,33-,35-,36+,37+,38+/m1/s1	119959	3.79544	3.48576	Outside AD
E144	81103-11-9	InChI=1S/C38H69NO13/c1-15-26-38(10,45)31(42)21(4)28(40)19(2)17-37(9,47-14)33(52-35-29(41)25(39(11)12)16-20(3)48-35)22(5)30(23(6)34(44)50-26)51-27-18-36(8,46-13)32(43)24(7)49-27/h19-27,29-33,35,41-43,45H,15-18H2,1-14H3/t19-,20+,21+,22-,23+,24-,25-,26+,27-,29-,30+,31-,32+,33+,35-,36-,37-,38-/m0/s1	18701.4	4.602	3.65117	Outside AD
E156	60-54-8	InChI=1S/C22H24N2O8/c1-21(31)8-5-4-6-11(25)12(8)16(26)13-9(21)7-10-15(24(2)3)17(27)14(20(23)30)19(29)22(10,32)18(13)28/h4-6,9-10,15,25,27-28,31-32H,7H2,1-3H3,(H2,23,30)/t9-,10+,15-,21+,22+/m1/s1	165.123	6.43	3.16244	Outside AD
E300	20830-75-5	InChI=1S/C41H64O14/c1-19-36(47)28(42)15-34(50-19)54-38-21(3)52-35(17-30(38)44)55-37-20(2)51-33(16-29(37)43)53-24-8-10-39(4)23(13-24)6-7-26-27(39)14-31(45)40(5)25(9-11-41(26,40)48)22-12-32(46)49-18-22/h12,19-21,23-31,33-38,42-45,47-48H,6-11,13-18H2,1-5H3/t19-,20+,21+,23-,24-,25+,26-,27-,28-,29+,30+,31-,33-,34+,35+,36-,37+,38+,39-,40-,41+/m1/s1	22711.7	4.53637	3.08026	Outside AD
E327	57-92-1	InChI=1S/C21H39N7O12/c1-5-21(36,4-30)16(40-17-9(26-2)13(34)10(31)6(3-29)38-17)18(37-5)39-15-8(28-20(24)25)11(32)7(27-19(22)23)12(33)14(15)35/h4-18,26,29,31-36H,3H2,1-2H3,(H4,22,23,27)(H4,24,25,28)/t5-,6-,7+,8-,9-,10+,11+,12-,13+,14-,15-,16-,17+,18-,21-/m1/s1	487085	3.077	0.32493	Outside AD
E328	7542-37-2	InChI=1S/C23H45N5O14/c24-2-7-13(32)15(34)10(27)21(37-7)41-19-9(4-30)39-23(17(19)36)42-20-12(31)5(25)1-6(26)18(20)40-22-11(28)16(35)14(33)8(3-29)38-22/h5-23,29-36H,1-4,24-28H2/t5-,6-,7-,8+,9+,10+,11+,12-,13+,14+,15+,16-,17-,18+,19+,20+,21-,22+,23-/m0/s1	502712	3.088	0.155181	Outside AD
E385	59865-13-3	InChI=1S/C62H111N11O12/c1-25-27-28-40(15)52(75)51-56(79)65-43(26-2)58(81)67(18)33-48(74)68(19)44(29-34(3)4)55(78)66-49(38(11)12)61(84)69(20)45(30-35(5)6)54(77)63-41(16)53(76)64-42(17)57(80)70(21)46(31-36(7)8)59(82)71(22)47(32-37(9)10)60(83)72(23)50(39(13)14)62(85)73(51)24/h25,27,34-47,49-52,75H,26,28-33H2,1-24H3,(H,63,77)(H,64,76)(H,65,79)(H,66,78)/b27-25+/t40-,41-,42-,43-,44+,45+,46+,47+,49-,50+…	20002.2	4.77905	0.253851	Outside AD
E399	19295-81-9	InChI=1S/C24H38O4/c1-3-5-7-9-10-12-16-20-28-24(26)22-18-14-13-17-21(22)23(25)27-19-15-11-8-6-4-2/h13-14,17-18H,3-12,15-16,19-20H2,1-2H3	249.852	6.194	5.45528	Outside AD
E469	107-64-2	InChI=1S/C38H80N/c1-5-7-9-11-13-15-17-19-21-23-25-27-29-31-33-35-37-39(3,4)38-36-34-32-30-28-26-24-22-20-18-16-14-12-10-8-6-2/h5-38H2,1-4H3/q+1	3100	5.24983	0.0768946	Outside AD
E472	112-02-7	InChI=1S/C19H42N/c1-5-6-7-8-9-10-11-12-13-14-15-16-17-18-19-20(2,3)4/h5-19H2,1-4H3/q+1	10	7.45415	2.94668	Outside AD
E492	1405-87-4	InChI=1S/C66H103N17O16S/c1-9-35(6)52(69)66-81-48(32-100-66)63(97)76-43(26-34(4)5)59(93)74-42(22-23-50(85)86)58(92)83-53(36(7)10-2)64(98)75-40-20-15-16-25-71-55(89)46(29-49(68)84)78-62(96)47(30-51(87)88)79-61(95)45(28-39-31-70-33-72-39)77-60(94)44(27-38-18-13-12-14-19-38)80-65(99)54(37(8)11-3)82-57(91)41(21-17-24-67)73-56(40)90/h12-14,18-19,31,33-37,39-48,52-54H,9-11,15-17,20-30,32,67,69H2,1-8H3,(…	30480	4.6691	0.0345492	Outside AD
E504	4016-24-4	InChI=1S/C18H36O5S/c1-3-5-6-7-8-9-10-11-12-13-14-15-16-17(24(20,21)22)18(19)23-4-2/h17H,3-16H2,1-2H3,(H,20,21,22)/t17-/m0/s1	1240	5.46832	3.99799	Outside AD
E509	5137-55-3	InChI=1S/C25H54N/c1-5-8-11-14-17-20-23-26(4,24-21-18-15-12-9-6-2)25-22-19-16-13-10-7-3/h5-25H2,1-4H3/q+1	52	6.85067	1.36311	Outside AD
E513	7173-51-5	InChI=1S/C22H48N/c1-5-7-9-11-13-15-17-19-21-23(3,4)22-20-18-16-14-12-10-8-6-2/h5-22H2,1-4H3/q+1	160	6.30993	2.09452	Outside AD
E514	7722-88-5	InChI=1S/H4O7P2/c1-8(2,3)7-9(4,5)6/h(H2,1,2,3)(H2,4,5,6)	391000	2.65818	2.2418	Outside AD
E516	8001-54-5	InChI=1S/C23H42N/c1-4-5-6-7-8-9-10-11-12-13-14-18-21-24(2,3)22-23-19-16-15-17-20-23/h15-17,19-20H,4-14,18,21-22H2,1-3H3/q+1	110	6.48051	4.4166	Outside AD
E518	8044-71-1	InChI=1S/C17H38N/c1-5-6-7-8-9-10-11-12-13-14-15-16-17-18(2,3)4/h5-17H2,1-4H3/q+1	22	7.06665	3.58978	Outside AD
E519	17090-79-8	InChI=1S/C36H62O11/c1-10-34(31-20(3)16-26(43-31)28-19(2)15-21(4)36(41,18-37)46-28)12-11-27(44-34)33(8)13-14-35(47-33)17-25(38)22(5)30(45-35)23(6)29(42-9)24(7)32(39)40/h19-31,37-38,41H,10-18H2,1-9H3,(H,39,40)/t19-,20-,21+,22-,23-,24-,25-,26-,27+,28-,29+,30-,31-,33+,34+,35-,36-/m0/s1	10700	4.79726	3.10802	Outside AD
E535	68783-78-8	InChI=1S/C37H74N/c1-5-7-9-11-13-15-17-19-21-23-25-27-29-31-33-35-37-38(3,4)36-34-32-30-28-26-24-22-20-18-16-14-12-10-8-6-2/h19-22H,5-18,23-37H2,1-4H3/q+1/b21-19+,22-20+	490	6.03652	0.282823	Outside AD
E537	71048-99-2	InChI=1S/C11H22N3O6P/c1-6(9(15)14-7(2)11(17)18)13-10(16)8(12)4-5-21(3,19)20/h6-8H,4-5,12H2,1-3H3,(H,13,16)(H,14,15)(H,17,18)(H,19,20)/t6-,7+,8-/m1/s1	5000000	1.81061	2.47012	Outside AD
E538	71751-41-2	InChI=1S/C48H72O14/c1-11-25(2)43-28(5)17-18-47(62-43)23-34-20-33(61-47)16-15-27(4)42(26(3)13-12-14-32-24-55-45-40(49)29(6)19-35(46(51)58-34)48(32,45)52)59-39-22-37(54-10)44(31(8)57-39)60-38-21-36(53-9)41(50)30(7)56-38/h12-15,17-19,25-26,28,30-31,33-45,49-50,52H,11,16,20-24H2,1-10H3/b13-12-,27-15-,32-14-/t25-,26-,28-,30+,31-,33-,34+,35+,36+,37+,38+,39-,40+,41-,42-,43-,44+,45+,47-,48-/m0/s1	340	6.40957	2.58002	Outside AD
E545	89987-06-4	InChI=1S/C7H9ClO6P2S/c8-5-1-3-6(4-2-5)17-7(15(9,10)11)16(12,13)14/h1-4,7H,(H2,9,10,11)(H2,12,13,14)	320000	2.99811	2.2106	Outside AD
E558	159628-36-1	InChI=1S/C49H73NO14/c1-25(2)43-28(5)17-18-48(64-43)23-35-20-34(63-48)16-15-27(4)44(26(3)13-12-14-33-24-57-46-42(52)29(6)19-36(47(53)60-35)49(33,46)54)61-40-22-38(56-11)45(31(8)59-40)62-39-21-37(55-10)41(30(7)58-39)50-32(9)51/h12-15,17-19,25-26,28,30-31,34-46,52,54H,16,20-24H2,1-11H3,(H,50,51)/b13-12-,27-15-,33-14?/t26?,28-,30-,31-,34+,35-,36+,37+,38-,39?,40-,41+,42+,43-,44-,45-,46+,48+,49+/m0/s1	0.45	9.30108	2.37751	Outside AD
E581	71-63-6	InChI=1S/C41H64O13/c1-20-36(46)29(42)16-34(49-20)53-38-22(3)51-35(18-31(38)44)54-37-21(2)50-33(17-30(37)43)52-25-8-11-39(4)24(15-25)6-7-28-27(39)9-12-40(5)26(10-13-41(28,40)47)23-14-32(45)48-19-23/h14,20-22,24-31,33-38,42-44,46-47H,6-13,15-19H2,1-5H3/t20-,21+,22+,24+,25?,26-,27-,28+,29?,30+,31-,33-,34?,35-,36+,37+,38+,39-,40+,41-/m0/s1	99678.1	3.88503	2.89839	Outside AD
E616	1401-69-0	InChI=1S/C46H77NO17/c1-13-33-30(22-58-45-42(57-12)41(56-11)37(52)26(5)60-45)18-23(2)14-15-31(49)24(3)19-29(16-17-48)39(25(4)32(50)20-34(51)62-33)64-44-38(53)36(47(9)10)40(27(6)61-44)63-35-21-46(8,55)43(54)28(7)59-35/h14-15,17-18,24-30,32-33,35-45,50,52-55H,13,16,19-22H2,1-12H3/b15-14-,23-18-/t24-,25?,26-,27+,28?,29-,30-,32+,33-,35-,36-,37+,38+,39+,40-,41?,42+,43?,44+,45-,46-/m0/s1	678957	3.1301	2.97244	Outside AD
E647	73334-07-3	InChI=1S/C18H24I3N3O8/c1-24(4-9(28)6-26)18(31)12-13(19)11(17(30)22-3-8(27)5-25)14(20)16(15(12)21)23-10(29)7-32-2/h8-9,25-28H,3-7H2,1-2H3,(H,22,30)(H,23,29)/t8-,9?/m1/s1	1.01262e+06	2.89279	2.35929	Outside AD
E654	96829-58-2	InChI=1S/C30H55NO5/c1-5-7-9-11-12-13-14-15-16-18-25(35-30(34)27(31-23-32)21-20-24(3)4)22-28-26(29(33)36-28)19-17-10-8-6-2/h23-28H,5-22H2,1-4H3,(H,31,32)/t25-,26-,27-,28-/m0/s1	5097.61	5	2.23602	Outside AD
E658	127779-20-8	InChI=1S/C38H50N6O5/c1-38(2,3)43-37(49)32-20-26-14-7-8-15-27(26)22-44(32)23-33(45)30(19-24-11-5-4-6-12-24)41-36(48)31(21-34(39)46)42-35(47)29-18-17-25-13-9-10-16-28(25)40-29/h4-6,9-13,16-18,26-27,30-33,45H,7-8,14-15,19-23H2,1-3H3,(H2,39,46)(H,41,48)(H,42,47)(H,43,49)/t26-,27-,30+,31+,32+,33?/m1/s1	34784.2	4.28524	2.94007	Outside AD
